# Supplementary material
Source: Royal Society of Chemistry journal article supplement (doi:10.1039/d6gc00831c)
Supplement: d6gc00831c1.pdf [file d6gc00831c1.pdf]

**A well-defined Pd(II)–NHC aqua complex for ambient Buchwald–Hartwig amination in *tert*-butanol**

Yaxu Liu,<sup>a</sup> Zheng Wang,<sup>c</sup> Ziyi Quan,<sup>a</sup> Fengze Sun,<sup>a</sup> Lixing Zhao,<sup>d</sup> Lei Guo,<sup>e</sup> Yixuan Gao,<sup>f</sup> Bo Wang<sup>\*a,b</sup>

<sup>a</sup> Department of Biological Engineering, College of Chemical and Biological Engineering, Shandong University of Science and Technology, Qingdao 266590, P.R. China.

<sup>b</sup> The China National Deep Sea Center, Jimo District Qingdao 266237, P.R. China.

<sup>c</sup> Department of Chemical Engineering, Hebei Petroleum University of Technology, Chengde 067000, P.R. China.

<sup>d</sup> College of Chemistry and Chemical Engineering, Qingdao University, 308 Ningxia Road, Qingdao 266071, P.R. China.

<sup>e</sup> College of Energy and Mining Engineering, Shandong University of Science and Technology, Qingdao 266590, P.R. China.

<sup>f</sup> Agricultural Clean Watershed Research Group, Institute of Environment and Sustainable Development in Agriculture, Chinese Academy of Agricultural Sciences/Key Laboratory of Agricultural and Rural Eco-Environment, Ministry of Agriculture and Rural Affairs, Beijing, 100081, China

Table of contents

|                                                                                                                                      |      |
|--------------------------------------------------------------------------------------------------------------------------------------|------|
| General information .....                                                                                                            | S2   |
| Preparation of Pd(IPr <sup>#</sup> )Cl(allyl).....                                                                                   | S2   |
| Preparation of Pd(IPr <sup>#</sup> )Cl(cin).....                                                                                     | S3   |
| Preparation of Pd(BIAN-IPr <sup>#</sup> )Cl(allyl).....                                                                              | S3   |
| Preparation of Pd(IPr <sup>#</sup> )Cl <sub>2</sub> (OH <sub>2</sub> ).....                                                          | S4   |
| Preparation of Pd(BIAN-IPr <sup>#</sup> )Cl <sub>2</sub> (OH <sub>2</sub> ) .....                                                    | S5   |
| Procedure of optimization of Buchwald-Hartwig amination reaction.....                                                                | S6   |
| Comparative of activity of Pd(BIAN-IPr <sup>#</sup> )Cl <sub>2</sub> (OH <sub>2</sub> ) and Pd(BIAN-IPr <sup>#</sup> )Cl(allyl)..... | S7   |
| The selectivity of Pd(BIAN-IPr <sup>#</sup> )Cl <sub>2</sub> (OH <sub>2</sub> ) in C-N cross-coupling reaction.....                  | S7   |
| General procedure of Buchwald-Hartwig amination reaction.....                                                                        | S7   |
| Characterization data of desired product.....                                                                                        | S8   |
| Computational studies .....                                                                                                          | S85  |
| Reference.....                                                                                                                       | S221 |

## General information

All reactions were performed under inert atmosphere using Glovebox or Schlenk line techniques unless otherwise mentioned. All the reactions were carried out at 25-30 °C unless otherwise mentioned. All solvents and all other reagents were purchased from commercial suppliers (e.g., Aladdin, Macklin) and used as received without further purification unless otherwise stated.  $^1\text{H}$  NMR and  $^{13}\text{C}$  NMR spectra were recorded on a Bruker Avance-300, 400 or 500 instruments at 298K. Chemical shifts (ppm) in  $^1\text{H}$  and  $^{13}\text{C}$  NMR spectra are referenced to the residual solvent peak ( $\text{CDCl}_3$ :  $\delta_{\text{H}} = 7.26$  ppm,  $\delta_{\text{C}} = 77.23$  ppm;  $\text{DMSO-d}_6$ :  $\delta_{\text{H}} = 2.50$  ppm,  $\delta_{\text{C}} = 39.51$  ppm). Coupling constants (J) are given in hertz (Hz). Abbreviations used in the designation of the signals: s = singlet, d = doublet, t = triplet, m = multiplet, q = quadruplet. All GC analyses were performed on Agilent 7890A Gas Chromatograph with FID detector using J&W HP-5 column (30 m, 0.32 mm). All reagents and solvents were purchased from commercial suppliers (e.g., Aladdin, Macklin) and used as received without further purification, unless specifically noted.

## Preparation of Pd(IPr<sup>#</sup>)Cl(allyl)

Under aerobic conditions, IPr<sup>#</sup>·HCl (0.2 mmol, 205.8 mg),  $[\text{Pd}(\text{allyl})\text{Cl}]_2$  (0.1 mmol, 36.6 mg),  $\text{K}_2\text{CO}_3$  (0.4 mmol, 55.3 mg), and acetone (1.5 mL) were added to a vial. The mixture was stirred at 60 °C for 3 hours. After cooling to room temperature, the mixture was filtered through a short pad of  $\text{SiO}_2$ , and the solvent was removed under reduced pressure. Recrystallization from DCM/pentane afforded Pd(IPr<sup>#</sup>)Cl(allyl) as a pale white powder in 96% yield (270 mg).

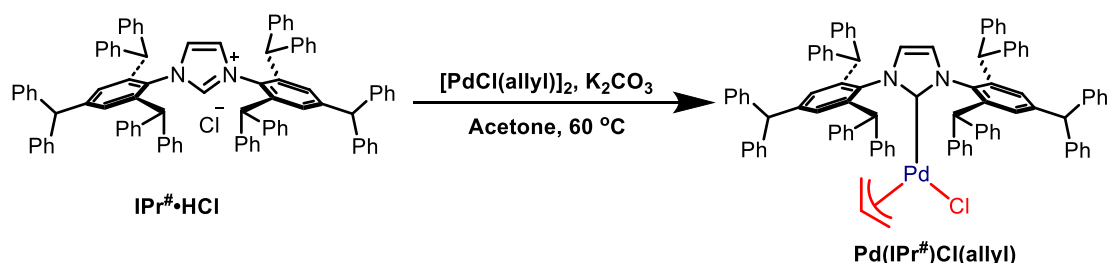

$^1\text{H}$  NMR (400 MHz,  $\text{CDCl}_3$ )  $\delta$  7.16-7.077 (m, 44H,  $\text{CH}_{\text{Ar}}$ ), 6.92-6.89 (m, 8H,  $\text{CH}_{\text{Ar}}$ ), 6.77-6.73 (m, 12H,  $\text{CH}_{\text{Ar}}$ ), 5.90 (s, 2H,  $\underline{\text{CH}}(\text{Ph})_2$ ), 5.75 (s, 2H,  $\underline{\text{CH}}(\text{Ph})_2$ ), 5.35 (s, 2H,  $\underline{\text{CH}}(\text{Ph})_2$ ), 5.33 (s, 2H,  $\text{CH}=\text{CH}$ ), 4.40 (dq,  $J = 13.4, 6.7$  Hz, 1H,  $\text{CH}^{\text{allyl}}$ ), 4.08 (dd,  $J = 7.5, 2.1$  Hz, 1H,  $\text{CH}^{\text{allyl}}$ ), 2.91 (d,  $J = 13.4$  Hz, 1H,  $\text{CH}^{\text{allyl}}$ ), 2.50 (dd,  $J = 6.3, 2.2$  Hz, 1H,  $\text{CH}^{\text{allyl}}$ ), 1.04 (d,  $J = 12.0$  Hz, 1H,  $\text{CH}^{\text{allyl}}$ ).

$^{13}\text{C}$  NMR (101 MHz,  $\text{CDCl}_3$ )  $\delta$  184.25 ( $\text{C}^{\text{Im-Pd}}$ ), 144.54 ( $\text{C}_{\text{Ar}}$ ), 144.43 ( $\text{C}_{\text{Ar}}$ ), 144.25 ( $\text{C}_{\text{Ar}}$ ), 143.39 ( $\text{C}_{\text{Ar}}$ ), 143.27 ( $\text{C}_{\text{Ar}}$ ), 141.40 ( $\text{C}_{\text{Ar}}$ ), 141.33 ( $\text{C}_{\text{Ar}}$ ), 136.36 ( $\text{C}_{\text{Ar}}$ ), 130.87 ( $\text{CH}_{\text{Ar}}$ ), 130.70 ( $\text{CH}_{\text{Ar}}$ ), 130.30 ( $\text{CH}_{\text{Ar}}$ ), 130.26 ( $\text{CH}_{\text{Ar}}$ ), 129.30 ( $\text{CH}_{\text{Ar}}$ ), 129.24 ( $\text{CH}_{\text{Ar}}$ ), 128.41 ( $\text{CH}_{\text{Ar}}$ ), 128.34 ( $\text{CH}_{\text{Ar}}$ ), 128.07 ( $\text{CH}_{\text{Ar}}$ ), 126.37 ( $\text{CH}_{\text{Ar}}$ ), 126.34 ( $\text{CH}_{\text{Ar}}$ ), 123.36 ( $\text{CH}=\text{CH}$ ), 115.03 ( $\text{CH}^{\text{allyl}}$ ), 71.78 ( $\text{CH}^{\text{allyl}}$ ), 56.34 ( $\underline{\text{CH}}(\text{Ph})_2$ ), 51.64 ( $\underline{\text{CH}}(\text{Ph})_2$ ), 51.58 ( $\underline{\text{CH}}(\text{Ph})_2$ ).

**Elemental analysis:** Calculated: C 82.33, H 5.54, N 2.00. Found: C 81.98, H 5.25, N 1.69.

### Preparation of Pd(IPr<sup>#</sup>)Cl(cin)

Under aerobic condition, IPr<sup>#</sup>·HCl (0.2 mmol, 205.8 mg), [Pd(cin)Cl]<sub>2</sub> (0.1 mmol, 51.8 mg), K<sub>2</sub>CO<sub>3</sub> (0.4 mmol, 55.3 mg), and acetone (1.5 mL) were added to a vial. The mixture was stirring at 60°C for 8 hours. After cooling to room temperature, the mixture was filtered through a short pad of SiO<sub>2</sub>, and the solvent was removed under reduced pressure. Recrystallization from DCM/hexane afforded Pd(IPr<sup>#</sup>)Cl(cin) as a light-yellow powder in 92% yield (272 mg). And the data matched with reported paper.<sup>1</sup>

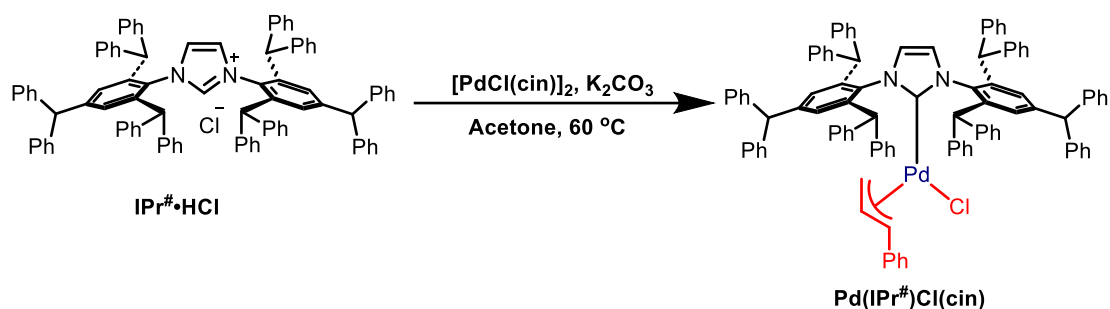

<sup>1</sup>H NMR (500 MHz, CDCl<sub>3</sub>) δ 7.40-7.34 (m, 5H), 7.19-7.05 (m, 44H), 6.95(t, *J* = 7.1 Hz, 8H), 6.79 (t, *J* = 7.4 Hz, 8H), 6.71 (d, *J* = 8.1 Hz, 4H), 6.09 (s, 2H), 5.62 (s, 2H), 5.36 (d, *J* = 10.6 Hz, 4H), 4.80 (m, 1H), 4.48 (d, *J* = 13.0 Hz, 1H), 2.52 (d, *J* = 6.8 Hz, 1H), 1.19 (d, *J* = 11.5 Hz, 1H).

<sup>13</sup>C NMR (126 MHz, CDCl<sub>3</sub>) δ 183.14, 144.70, 144.21, 143.48, 143.45, 143.36, 143.29, 141.70, 140.60, 137.90, 136.29, 130.86, 130.70, 130.62, 130.33, 129.30, 129.18, 129.08, 128.67, 128.44, 128.37, 128.18, 128.15, 127.70, 127.16, 126.36, 123.46, 108.99, 90.79, 56.44, 56.33, 51.68, 47.51.

**Elemental analysis:** Calculated: C 82.97, H 5.53, N 1.90. Found: C 82.72, H 5.19, N 1.74.

### Preparation of Pd(BIAN-IPr<sup>#</sup>)Cl(allyl)

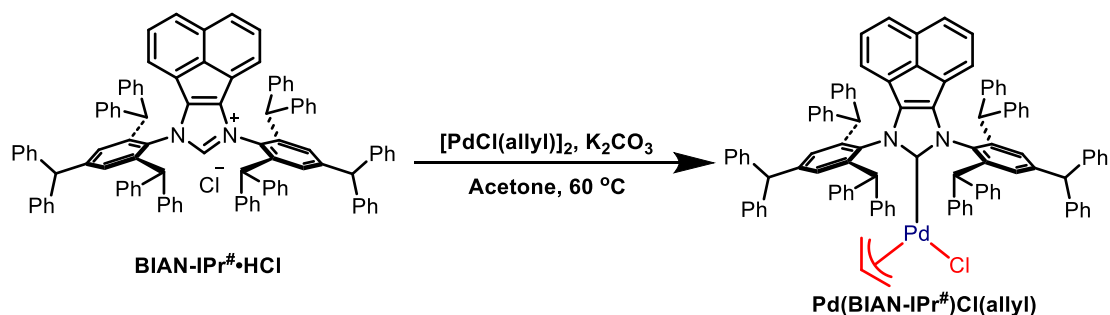

Under aerobic condition, BIAN-IPr<sup>#</sup>·HCl (0.29 mmol, 400 mg), [Pd(allyl)Cl]<sub>2</sub> (0.145 mmol, 53 mg), K<sub>2</sub>CO<sub>3</sub> (0.75 mmol, 103 mg), and acetone (3 mL) were added to a vial. The mixture was stirred at 60°C for 5 hours. After cooling to room temperature, the mixture was filtered through

a short pad of SiO<sub>2</sub>, and the solvent was removed under reduced pressure. Recrystallization from THF/hexane afforded Pd(BIAN-IPr<sup>#</sup>)Cl(allyl) as a yellow powder in 93% yield (407 mg).

<sup>1</sup>H NMR (500 MHz, CDCl<sub>3</sub>) δ 7.29 (t, *J* = 7.4 Hz, 10H), 7.25-7.21 (m, 6H, CH<sub>Ar</sub>), 7.16 (s, 10H, CH<sub>Ar</sub>), 7.11 (d, *J* = 7.2 Hz, 8H, CH<sub>Ar</sub>), 7.09-6.99 (m, 12H, CH<sub>Ar</sub>), 6.75-6.45 (m, 22H, CH<sub>Ar</sub>), 6.11 (s, 2H, CH(Ph)<sub>2</sub>), 5.96 (s, 2H, CH(Ph)<sub>2</sub>), 5.67 (d, *J* = 6.9 Hz, 2H, CH<sub>Ar</sub>), 5.57 (s, 2H, CH(Ph)<sub>2</sub>), 4.45 (dq, *J* = 13.1, 8.5 Hz, 1H, CH<sup>allyl</sup>), 4.13 (d, *J* = 7.4 Hz, 1H, CH<sup>allyl</sup>), 3.03 (d, *J* = 13.3 Hz, 1H, CH<sup>allyl</sup>), 2.38 (s, 1H, CH<sup>allyl</sup>), 1.26 (d, *J* = 12.5 Hz, 1H, CH<sup>allyl</sup>).

<sup>13</sup>C NMR (126 MHz, CDCl<sub>3</sub>) δ 190.52 (C<sup>Im</sup>-Pd), 144.57 (C<sub>Ar</sub>), 143.49 (C<sub>Ar</sub>), 141.75 (C<sub>Ar</sub>), 140.51 (C<sub>Ar</sub>), 135.97 (C<sub>Ar</sub>), 131.29 (CH<sub>Ar</sub>), 130.29 (CH<sub>Ar</sub>), 129.59 (CH<sub>Ar</sub>), 129.50 (CH<sub>Ar</sub>), 129.42 (CH<sub>Ar</sub>), 129.42 (CH<sub>Ar</sub>), 128.48 (CH<sub>Ar</sub>), 128.40 (CH<sub>Ar</sub>), 127.82 (CH<sub>Ar</sub>), 127.78 (CH<sub>Ar</sub>), 127.76 (CH<sub>Ar</sub>), 126.51 (CH<sub>Ar</sub>), 126.25 (CH<sub>Ar</sub>), 126.15 (CH<sub>Ar</sub>), 126.07 (CH<sub>Ar</sub>), 125.99 (CH<sub>Ar</sub>), 125.81 (CH<sub>Ar</sub>), 125.78 (CH<sub>Ar</sub>), 124.86 (C=C, backbone), 121.46 (CH<sub>Ar</sub>), 121.39 (CH<sub>Ar</sub>), 114.79 (CH<sup>allyl</sup>), 69.89 (CH<sup>allyl</sup>), 56.61 (CH(Ph)<sub>2</sub>), 56.53 (CH(Ph)<sub>2</sub>), 51.88 (CH(Ph)<sub>2</sub>).

**Elemental analysis:** Calculated: C 83.50, H 5.36, N 1.84. Found: C 83.63, H 5.19, N 1.65.

#### Preparation of Pd(IPr<sup>#</sup>)Cl<sub>2</sub>(OH<sub>2</sub>)

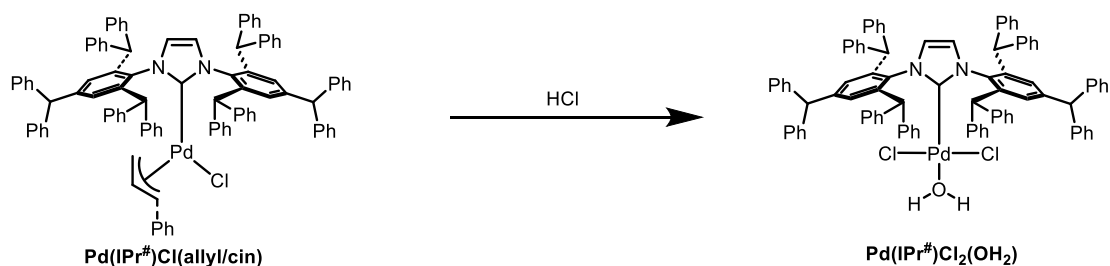

Under a N<sub>2</sub> atmosphere, the Pd(IPr<sup>#</sup>)Cl(allyl) (0.2 mmol, 280 mg) and excess HCl (2.5 mL, 4M in 1,4-dioxane) were added to a Schlenk flask. The mixture was stirred at 40°C for 24 hours, during which a yellow solution was observed. After cooling to room temperature, the solvent was removed under reduced pressure. A minimal amount of THF was added, followed by the addition of excess hexane to precipitate a yellow solid. The solid was collected, washed with hexane, and dried under vacuum to afford Pd(IPr<sup>#</sup>)Cl<sub>2</sub>(OH<sub>2</sub>) as a fine pale-yellow solid in quantitative yield (267 mg, 94%). In addition, Pd(IPr<sup>#</sup>)Cl<sub>2</sub>(OH<sub>2</sub>) could also be synthesized from Pd(IPr<sup>#</sup>)Cl(cin) under the same reaction conditions.

<sup>1</sup>H NMR (500 MHz, DMSO-d<sub>6</sub>) δ = 7.24-7.18 (m, 16H, CH<sub>Ar</sub>), 7.16-7.09 (m, 16H, CH<sub>Ar</sub>), 7.07 (d, *J* = 7.3 Hz, 4H, 3,5-CH<sub>Ar</sub>), 7.02 (t, *J* = 7.4 Hz, 8H, CH<sub>Ar</sub>), 6.98 (d, *J* = 7.1 Hz, 8H, CH<sub>Ar</sub>), 6.70 (s, 4H, CH<sub>Ar</sub>), 6.54 (d, *J* = 7.1 Hz, 8H, CH<sub>Ar</sub>), 6.11 (s, 4H, CH(Ph)<sub>2</sub>), 5.50 (s, 2H, CH(Ph)<sub>2</sub>), 4.61 (s, 2H, CH=CH).

<sup>13</sup>C NMR (126 MHz, DMSO-d<sub>6</sub>) δ 143.76 (C<sub>Ar</sub>), 143.53 (C<sub>Ar</sub>), 143.32 (C<sub>Ar</sub>), 143.28 (C<sub>Ar</sub>), 141.22 (C<sub>Ar</sub>), 134.73 (C<sub>Ar</sub>), 132.37 (C<sub>Ar</sub>), 130.30 (CH<sub>Ar</sub>), 129.80 (CH<sub>Ar</sub>), 128.79 (CH<sub>Ar</sub>), 128.55

(CH<sub>Ar</sub>), 128.21 (CH<sub>Ar</sub>), 127.72 (CH<sub>Ar</sub>), 126.41 (CH<sub>Ar</sub>), 126.21 (CH<sub>Ar</sub>), 126.09(CH<sub>Ar</sub>), 124.14 (CH=CH), 55.02 (CH(Ph)<sub>2</sub>), 50.28 (CH(Ph)<sub>2</sub>).

**Elemental analysis:** Calculated: C 79.06, H 5.28, N 1.98. Found: C 78.93, H 5.17, N 1.58.

### Preparation of Pd(BIAN-IPr<sup>#</sup>)Cl<sub>2</sub>(OH<sub>2</sub>)

Under a N<sub>2</sub> atmosphere, Pd(BIAN-IPr<sup>#</sup>)Cl(allyl) (0.2 mmol, 306 mg) and excess HCl (2.5 mL, 4 M in 1,4-dioxane) were added to a Schlenk flask. The mixture was stirred at 40 °C for 24 hours, during which a reddish-brown coloration was observed. After cooling to room temperature, the solvent was removed under reduced pressure. A minimal amount of THF was added, followed by the addition of excess hexane to precipitate a yellow solid. The solid was collected, washed with hexane, and dried under vacuum to afford Pd(BIAN-IPr<sup>#</sup>)Cl<sub>2</sub>(OH<sub>2</sub>) as a fine yellow solid in quantitative yield (300 mg, 97%).

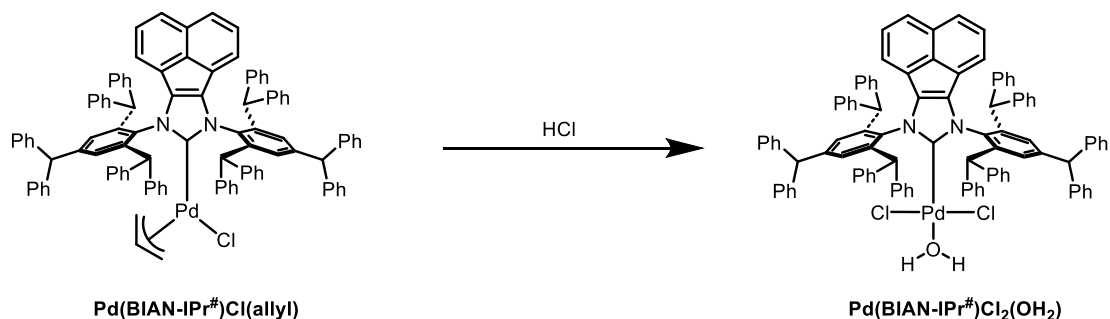

<sup>1</sup>H NMR (500 MHz, DMSO-d<sub>6</sub>) δ 7.30 (t, *J* = 7.4 Hz, 8H, CH<sub>Ar</sub>), 7.23 (dt, *J* = 9.2, 5.0 Hz, 6H, CH<sub>Ar</sub>), 7.12 (d, *J* = 7.8 Hz, 12H, CH<sub>Ar</sub>), 7.03 (s, 20H, CH<sub>Ar</sub>), 6.61 (t, *J* = 7.6 Hz, 2H, CH<sub>Ar</sub>), 6.51 (t, *J* = 7.3 Hz, 4H, CH<sub>Ar</sub>), 6.29 (t, *J* = 7.5 Hz, 8H, CH<sub>Ar</sub>), 6.25-6.16 (m, 12H, CH(Ph)<sub>2</sub> and CH<sub>Ar</sub> overlapped), 5.77 (s, 2H, CH(Ph)<sub>2</sub>), 5.48 (d, *J* = 6.9 Hz, 2H, CH<sub>Ar</sub>).

<sup>13</sup>C NMR (126 MHz, DMSO-d<sub>6</sub>) δ 144.76 (CH<sub>Ar</sub>), 144.35 (CH<sub>Ar</sub>), 143.26 (CH<sub>Ar</sub>), 141.45 (CH<sub>Ar</sub>), 140.95 (CH<sub>Ar</sub>), 140.04 (CH<sub>Ar</sub>), 134.87 (CH<sub>Ar</sub>), 131.61 (C<sub>Ar</sub>), 129.86 (C<sub>Ar</sub>), 128.87 (C<sub>Ar</sub>), 128.80 (C<sub>Ar</sub>), 128.46 (C<sub>Ar</sub>), 128.36 (C<sub>Ar</sub>), 127.34 (C<sub>Ar</sub>), 126.85 (C<sub>Ar</sub>), 126.37(C<sub>Ar</sub>), 126.15 (C<sub>Ar</sub>), 125.84 (C<sub>Ar</sub>), 125.48 (C<sub>Ar</sub>), 125.35 (C=C, backbone), 124,21 (C<sub>Ar</sub>), 120.70 (CH<sub>Ar</sub>), 55.04 (CH(Ph)<sub>2</sub>), 50.12 (CH(Ph)<sub>2</sub>).

**Elemental analysis:** Calculated: C 80.49, H 5.12, N 1.82. Found: C 80.18, H 5.37, N 1.56.

| (Å)   | 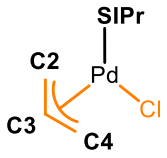 |  |  |  |
|-------|-----------------------------------------------------------------------------------|-----------------------------------------------------------------------------------|-----------------------------------------------------------------------------------|-------------------------------------------------------------------------------------|
| Pd-C2 | 2.118(6)                                                                          | 2.136(10)                                                                         | 2.155(11)                                                                         | 2.103(5)                                                                            |
| Pd-C3 | 2.132(7)                                                                          | 2.137(8)                                                                          | 2.183(10)                                                                         | 2.143(6)                                                                            |
| Pd-C4 | 2.203(6)                                                                          | 2.136(10)                                                                         | 2.291(10)                                                                         | 2.193(5)                                                                            |

Fig.S1 Selected bond distances in the crystals of Pd(SIPr)Cl(allyl/cin), Pd(SIPr<sup>Ph2</sup>)Cl(allyl) and Pd(BIAN-IPr<sup>#</sup>)Cl(allyl) complexes.

### Procedure of optimization of Buchwald-Hartwig amination reaction

Table S1 The optimization of the model reaction between 4-chloroanisole and aniline<sup>a,2</sup>

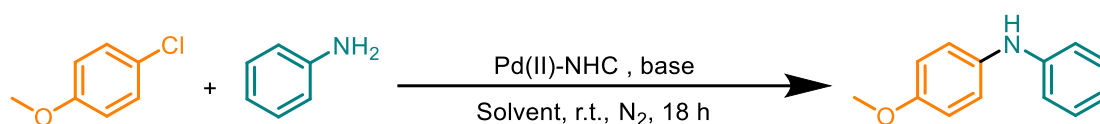

| Entry | Pd(II)-NHC                                                   | Loading (mol%) | Base                | Solvent           | Conv.(%) <sup>b</sup> |
|-------|--------------------------------------------------------------|----------------|---------------------|-------------------|-----------------------|
| 1     | Pd(IPr <sup>#</sup> )Cl <sub>2</sub> (OH <sub>2</sub> )      | 0.25           | KO <sup>t</sup> Bu  | 2-MeTHF           | < 5                   |
| 2     | Pd(BIAN-IPr <sup>#</sup> )Cl <sub>2</sub> (OH <sub>2</sub> ) | 0.25           | KO <sup>t</sup> Bu  | 2-MeTHF           | 16                    |
| 3     | Pd(IPr <sup>#</sup> )Cl <sub>2</sub> (OH <sub>2</sub> )      | 0.25           | NaO <sup>t</sup> Bu | 2-MeTHF           | 45                    |
| 4     | Pd(BIAN-IPr <sup>#</sup> )Cl <sub>2</sub> (OH <sub>2</sub> ) | 0.25           | NaO <sup>t</sup> Bu | 2-MeTHF           | >99                   |
| 5     | Pd(IPr <sup>#</sup> )Cl <sub>2</sub> (OH <sub>2</sub> )      | 0.25           | NaO <sup>t</sup> Bu | <sup>t</sup> BuOH | 42                    |
| 6     | Pd(BIAN-IPr <sup>#</sup> )Cl <sub>2</sub> (OH <sub>2</sub> ) | 0.25           | NaO <sup>t</sup> Bu | <sup>t</sup> BuOH | >99                   |
| 7     | Pd(BIAN-IPr <sup>#</sup> )Cl <sub>2</sub> (OH <sub>2</sub> ) | 0.1            | NaO <sup>t</sup> Bu | <sup>t</sup> BuOH | 99                    |
| 8     | Pd(BIAN-IPr <sup>#</sup> )Cl <sub>2</sub> (OH <sub>2</sub> ) | 0.05           | NaO <sup>t</sup> Bu | <sup>t</sup> BuOH | 76                    |

<sup>a</sup> 4-Chloroanisole (1 mmol), aniline (1.2 mmol), KO<sup>t</sup>Bu or NaO<sup>t</sup>Bu (1.2 mmol), Pd(II)-NHC (0.05-0.25 mol%), solvent (1.5 mL), room temperature, 18 hours, N<sub>2</sub>. <sup>b</sup> The reaction conversions were measured by GC (2 runs).

## Comparative of activity of Pd(BIAN-IPr<sup>#</sup>)Cl<sub>2</sub>(OH<sub>2</sub>) and Pd(BIAN-IPr<sup>#</sup>)Cl(allyl)

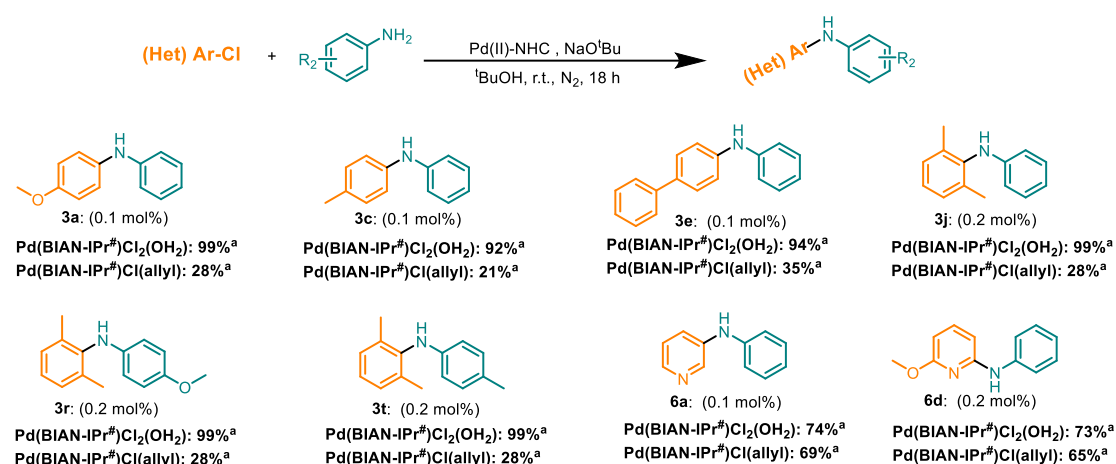

**Scheme S1.** Comparative of activity of two catalysts in C-N cross-coupling reaction. <sup>a</sup>Reaction yields were determined by GC analysis.

## The selectivity of Pd(BIAN-IPr<sup>#</sup>)Cl<sub>2</sub>(OH<sub>2</sub>) in C-N cross-coupling reaction

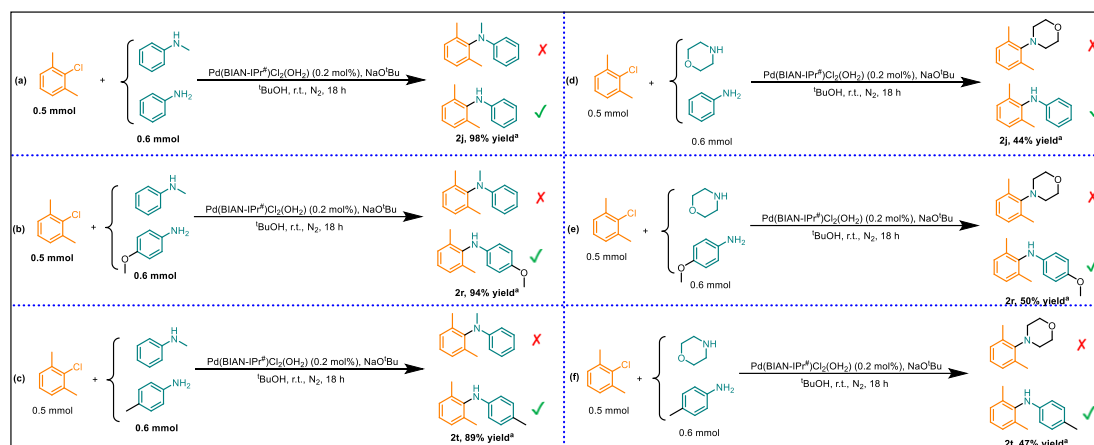

**Scheme S2.** High chemoselectivity of a Pd(BIAN-IPr<sup>#</sup>)Cl<sub>2</sub>(OH<sub>2</sub>) catalyst in Buchwald-Hartwig amination for secondary amine synthesis. <sup>a</sup>Reaction yields were determined by GC analysis.

## General procedure of Buchwald-Hartwig amination reaction

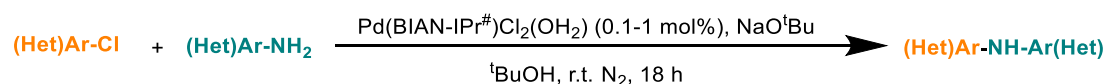

The Pd(BIAN-IPr<sup>#</sup>)Cl<sub>2</sub>(OH<sub>2</sub>) (0.1-1 mol%) and a stirring bar were charged in a 4 mL vial. The vial was transferred into a glovebox, where NaO<sup>t</sup>Bu (1.2 mmol) was added. The cap was then sealed, and the vial was removed from the glovebox. Under a N<sub>2</sub> atmosphere, the aryl chloride (1.0 mmol, liquid), amine (1.2 mmol, liquid), and the degassed <sup>t</sup>BuOH (1.5 mL) were added at room temperature. The reaction mixture was stirred at room temperature (25-30°C) for 18 h.

Subsequently, the reaction mixture was filtered through a fritted funnel, and the solvent was removed under reduced pressure. The corresponding product was purified by column chromatography on silica gel (eluent: EtOAc/petroleum ether or DCM/petroleum ether). In addition, the isolated yields were presented in Scheme 3 and 4.

### Characterization data of desired product.

#### 4-methoxy-N-phenylaniline (2a)<sup>2b</sup>

According to the general procedure, the corresponding final product was obtained as a white solid.

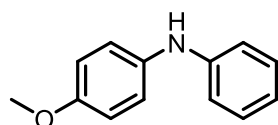

<sup>1</sup>H NMR (400 MHz, DMSO-d<sub>6</sub>) δ 7.81 (s, 1H), 7.16 (m, 2H), 7.04 (d, *J* = 8.9 Hz, 2H), 6.91 (d, *J* = 7.6 Hz, 2H), 6.86 (d, *J* = 8.9 Hz, 2H), 6.69 (t, *J* = 7.3 Hz, 1H), 3.71 (s, 3H).

#### 2-methoxy-N-phenylaniline (2b)<sup>4</sup>

According to the general procedure, the corresponding final product was obtained as yellow oil.

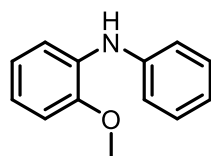

<sup>1</sup>H NMR (400 MHz, CDCl<sub>3</sub>) δ 7.48 (d, *J* = 8.1 Hz, 2H), 7.24 (d, *J* = 7.9 Hz, 2H), 2.40 (s, 3H).

#### 4-methyl-N-phenylaniline (2c)<sup>5</sup>

According to the general procedure, the corresponding final product was obtained as a pale white solid.

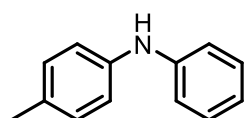

<sup>1</sup>H NMR (400 MHz, CDCl<sub>3</sub>) δ 7.25 (t, *J* = 7.5 Hz, 2H), 7.09 (d, *J* = 8.0 Hz, 2H), 7.03-7.00 (m, 4H), 6.89 (t, *J* = 7.3 Hz, 1H), 5.62 (s, 1H), 2.31 (s, 3H).

#### 2-methyl-N-phenylaniline (2d)<sup>4</sup>

According to the general procedure, the corresponding final product was obtained as yellow oil.

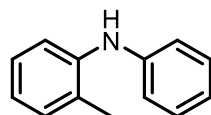

<sup>1</sup>H NMR (400 MHz, CDCl<sub>3</sub>) δ 7.27-7.22 (m, 3H), 7.19 (dd, *J* = 7.4, 1.5 Hz, 1H), 7.13 (td, *J* = 7.7, 1.6 Hz, 1H), 6.98-6.87 (m, 4H), 5.35 (s, 1H), 2.25 (s, 3H).

#### N-phenyl-[1,1'-biphenyl]-4-amine (2e)<sup>6</sup>

According to the general procedure, the corresponding final product was obtained as a white solid.

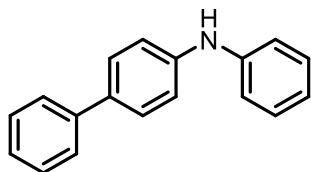

$^1\text{H NMR}$  (400 MHz,  $\text{CDCl}_3$ )  $\delta$  7.60 (dd,  $J = 8.3, 1.3$  Hz, 2H), 7.54 (d,  $J = 8.6$  Hz, 2H), 7.45 (t,  $J = 7.7$  Hz, 2H), 7.36-7.29 (m, 3H), 7.15 (dd,  $J = 8.6, 7.1$  Hz, 4H), 6.98 (tt,  $J = 7.3, 1.1$  Hz, 1H), 5.40 (s, 1H).

#### 4-fluoro-N-phenylaniline (2f)<sup>2b</sup>

According to the general procedure, the corresponding final product was obtained as brown oil.

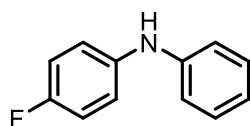

$^1\text{H NMR}$  (400 MHz,  $\text{CDCl}_3$ )  $\delta$  7.28-7.24 (m, 2H), 7.08-7.03 (m, 2H), 7.01-6.97 (m, 4H), 6.91 (t,  $J = 7.4$  Hz, 1H), 5.61 (s, 1H).

#### N-benzylaniline (2g)<sup>5</sup>

According to the general procedure, the corresponding final product was obtained as yellow oil.

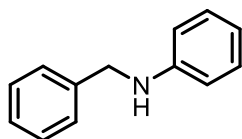

$^1\text{H NMR}$  (400 MHz,  $\text{CDCl}_3$ )  $\delta$  7.40-7.34 (m, 4H), 7.30-7.27 (m, 1H), 7.22-7.16 (m, 2H), 6.73 (t,  $J = 7.3$  Hz, 1H), 6.66 (d,  $J = 7.6$  Hz, 2H), 4.34 (s, 2H), 4.09 (s, 1H).

#### N-phenylnaphthalen-2-amine (2h)<sup>7</sup>

According to the general procedure, the corresponding final product was obtained as a pale-yellow solid.

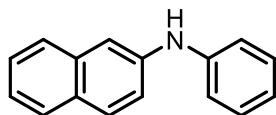

$^1\text{H NMR}$  (400 MHz,  $\text{CDCl}_3$ )  $\delta$  7.76 (d,  $J = 8.6$  Hz, 2H), 7.66 (d,  $J = 9.5$  Hz, 1H), 7.46 (d,  $J = 2.3$  Hz, 1H), 7.42 (ddd,  $J = 8.2, 6.8, 1.3$  Hz, 1H), 7.35-7.29 (m, 3H), 7.24 (dd,  $J = 8.8, 2.3$  Hz, 1H), 7.18 (d,  $J = 7.5$  Hz, 2H), 7.00 (t,  $J = 7.3$  Hz, 1H), 5.90 (s, 1H).

#### N-phenylnaphthalen-1-amine (2i)<sup>8</sup>

According to the general procedure, the corresponding final product was obtained as brown oil.

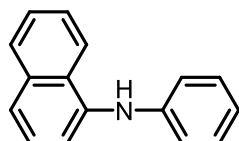

$^1\text{H}$  NMR (500 MHz,  $\text{CDCl}_3$ )  $\delta$  8.01 (dd,  $J = 7.9, 1.7$  Hz, 1H), 7.85 (dd,  $J = 7.4, 1.9$  Hz, 1H), 7.55 (dd,  $J = 7.5, 1.7$  Hz, 1H), 7.51-7.43 (m, 2H), 7.40-7.33 (m, 2H), 7.24 (dd,  $J = 6.5, 1.8$  Hz, 2H), 6.98 (d,  $J = 7.9$  Hz, 2H), 6.90 (t,  $J = 7.3$  Hz, 1H), 5.92 (s, 1H).

**2,6-dimethyl-N-phenylaniline (2j)**<sup>9</sup>

According to the general procedure, the corresponding final product was obtained as a white solid.

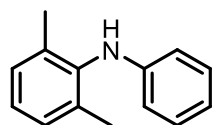

$^1\text{H}$  NMR (400 MHz,  $\text{CDCl}_3$ )  $\delta$  7.20-7.08 (m, 5H), 6.77 (t,  $J = 7.3$  Hz, 1H), 6.53 (d,  $J = 7.5$  Hz, 2H), 5.19 (s, 1H), 2.24 (s, 6H).

**bis(4-fluorophenyl)amine (2k)**<sup>10</sup>

According to the general procedure, the corresponding final product was obtained as brown oil.

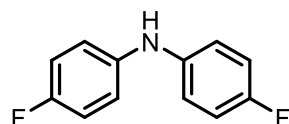

$^1\text{H}$  NMR (400 MHz,  $\text{CDCl}_3$ )  $\delta$  6.96 (d,  $J = 7.0$  Hz, 8H), 5.39 (s, 1H).

**4-fluoro-N-(p-tolyl)aniline (2l)**<sup>5</sup>

According to the general procedure, the corresponding final product was obtained as brown oil.

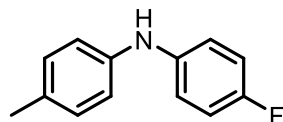

$^1\text{H}$  NMR (500 MHz,  $\text{CDCl}_3$ )  $\delta$  7.08 (d,  $J = 8.2$  Hz, 2H), 6.99 (dt,  $J = 10.7, 6.8$  Hz, 4H), 6.93 (d,  $J = 8.3$  Hz, 2H), 5.40 (s, 1H), 2.31 (s, 3H).

**4-fluoro-N-(4-methoxyphenyl)aniline (2m)**<sup>11</sup>

According to the general procedure, the corresponding final product was obtained as brown oil.

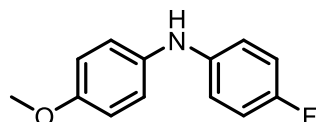

$^1\text{H}$  NMR (400 MHz,  $\text{CDCl}_3$ )  $\delta$  7.00 (d,  $J = 8.3$  Hz, 2H), 6.94-6.84 (m, 6H), 5.35 (s, 1H), 3.80 (s, 3H).

**bis(4-methoxyphenyl)amine (2n)**<sup>2b</sup>

According to the general procedure, the corresponding final product was obtained as a white solid.

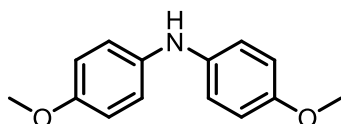

$^1\text{H NMR}$  (400 MHz,  $\text{DMSO-d}_6$ )  $\delta$  7.50 (s, 1H), 6.92 (d,  $J = 9.0$  Hz, 4H), 6.80 (d,  $J = 9.0$  Hz, 4H), 3.68 (s, 6H).

**4-methoxy-N-(p-tolyl)aniline (2o)<sup>2b</sup>**

According to the general procedure, the corresponding final product was obtained as a white solid.

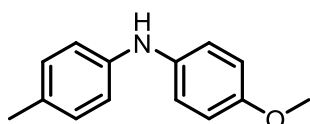

$^1\text{H NMR}$  (400 MHz,  $\text{DMSO-d}_6$ )  $\delta$  7.66 (s, 1H), 6.98 (m, 4H), 6.84 (m, 4H), 3.70 (s, 3H), 2.19 (s, 3H).

**2,4,6-trimethyl-N-(p-tolyl)aniline (2p)<sup>2b</sup>**

According to the general procedure, the corresponding final product was obtained as yellow oil.

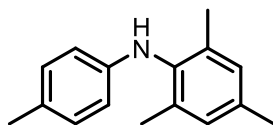

$^1\text{H NMR}$  (400 MHz,  $\text{CDCl}_3$ )  $\delta$  6.97 (d,  $J = 8.0$  Hz, 2H), 6.94 (s, 2H), 6.43 (d,  $J = 8.4$  Hz, 2H), 5.02 (s, 1H), 2.31 (s, 3H), 2.25 (s, 3H), 2.18 (s, 6H).

**2,6-diethyl-N-(p-tolyl)aniline (2q)<sup>2b</sup>**

According to the general procedure, the corresponding final product was obtained as yellow oil.

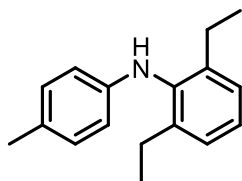

$^1\text{H NMR}$  (400 MHz,  $\text{CDCl}_3$ )  $\delta$  7.18 (m, 3H), 6.96 (d,  $J = 8.0$  Hz, 2H), 6.42 (d,  $J = 8.4$  Hz, 2H), 5.08 (s, 1H), 2.59 (q,  $J = 7.5$  Hz, 4H), 2.24 (s, 3H), 1.15 (t,  $J = 7.6$  Hz, 6H).

**N-(4-methoxyphenyl)-2,6-dimethylaniline (2r)<sup>9</sup>**

According to the general procedure, the corresponding final product was obtained as brown oil.

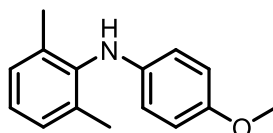

$^1\text{H NMR}$  (400 MHz,  $\text{CDCl}_3$ )  $\delta$  7.11 (d,  $J = 7.4$  Hz, 2H), 7.05 (dd,  $J = 8.5, 6.3$  Hz, 1H), 6.76 (d,  $J = 9.0$  Hz, 2H), 6.50 (d,  $J = 8.3$  Hz, 2H), 5.06 (s, 1H), 3.75 (s, 3H), 2.21 (s, 6H).

**N-(3-methoxyphenyl)-2,6-dimethylaniline (2s)<sup>11</sup>**

According to the general procedure, the corresponding final product was obtained as brown oil.

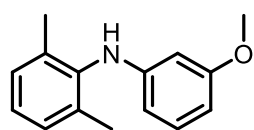

$^1\text{H}$  NMR (400 MHz,  $\text{CDCl}_3$ )  $\delta$  7.13-7.05 (m, 4H), 6.32 (ddd,  $J = 8.1, 2.5, 0.8$  Hz, 1H), 6.15 (ddd,  $J = 8.0, 2.2, 0.8$  Hz, 1H), 6.05 (t,  $J = 2.3$  Hz, 1H), 3.74 (s, 3H), 2.23 (s, 6H).

#### **2,6-dimethyl-N-(p-tolyl)aniline (2t)**<sup>8</sup>

According to the general procedure, the corresponding final product was obtained as brown oil.

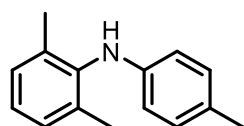

$^1\text{H}$  NMR (400 MHz,  $\text{CDCl}_3$ )  $\delta$  7.12 (d,  $J = 6.3$  Hz, 2H), 7.09-7.06 (m, 1H), 6.99-6.97 (m, 2H), 6.45 (d,  $J = 8.4$  Hz, 2H), 5.11 (s, 1H), 2.26 (s, 3H), 2.22 (s, 6H).

#### **N-(4-ethylphenyl)-2,6-dimethylaniline (2u)**

According to the general procedure, the corresponding final product was obtained as brown oil.

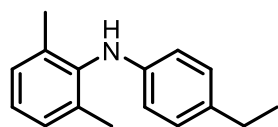

$^1\text{H}$  NMR (400 MHz,  $\text{CDCl}_3$ )  $\delta$  7.12 (d,  $J = 8.3$  Hz, 2H,  $\text{CH}_{\text{Ar}}$ ), 7.08-7.05 (m, 1H,  $\text{CH}_{\text{Ar}}$ ), 7.00 (d,  $J = 8.5$  Hz, 2H,  $\text{CH}_{\text{Ar}}$ ), 6.46 (d,  $J = 8.4$  Hz, 2H,  $\text{CH}_{\text{Ar}}$ ), 5.12 (s, 1H, NH), 2.56 (q,  $J = 7.6$  Hz, 2H,  $\text{CH}_2\text{CH}_3$ ), 2.22 (s, 6H,  $\text{CH}_3$ ), 1.20 (t,  $J = 7.6$  Hz, 3H,  $\text{CH}_2\text{CH}_3$ ).

$^{13}\text{C}$  NMR (101 MHz,  $\text{CDCl}_3$ )  $\delta$  144.17 ( $\text{C}_{\text{Ar}}$ ), 138.85 ( $\text{C}_{\text{Ar}}$ ), 135.63 ( $\text{C}_{\text{Ar}}$ ), 134.19 ( $\text{C}_{\text{Ar}}$ ), 128.65 ( $\text{CH}_{\text{Ar}}$ ), 128.62 ( $\text{CH}_{\text{Ar}}$ ), 125.50 ( $\text{CH}_{\text{Ar}}$ ), 113.94 ( $\text{CH}_{\text{Ar}}$ ), 28.06 ( $\text{CH}_2\text{CH}_3$ ), 18.54 ( $\text{CH}_3$ ), 15.89 ( $\text{CH}_2\text{CH}_3$ ).

HRMS: Calcd. For  $\text{C}_{16}\text{H}_{20}\text{N}$  ( $[\text{M}+\text{H}]^+$ ): 226.1590, Found: 226.1590

#### **N-(2,6-dimethylphenyl)-2,4,6-trimethylaniline (2v)**<sup>13</sup>

According to the general procedure, the corresponding final product was obtained as a white solid.

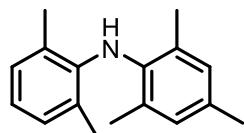

$^1\text{H}$  NMR (400 MHz,  $\text{CDCl}_3$ )  $\delta$  6.98 (d,  $J = 7.4$  Hz, 2H), 6.85-6.79 (m, 3H), 4.73 (s, 1H), 2.27 (s, 3H), 2.02 (s, 6H), 2.01 (s, 6H).

#### **N-(2,6-diethylphenyl)-2,6-dimethylaniline (2w)**<sup>8</sup>

According to the general procedure, the corresponding final product was obtained as colourless oil.

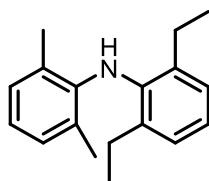

$^1\text{H NMR}$  (400 MHz,  $\text{CDCl}_3$ )  $\delta$  7.08-7.06 (m, 2H), 7.04-7.00 (m, 1H), 6.97 (d,  $J = 7.4$  Hz, 2H), 6.79 (t,  $J = 7.4$  Hz, 1H), 4.89 (s, 1H), 2.44 (q,  $J = 7.5$  Hz, 4H), 2.00 (s, 6H), 1.14 (t,  $J = 7.5$  Hz, 6H).

**N-(4-fluorophenyl)-2,6-dimethylaniline (2x)<sup>2e</sup>**

According to the general procedure, the corresponding final product was obtained as a rufous solid.

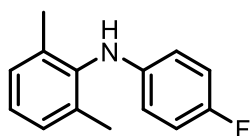

$^1\text{H NMR}$  (400 MHz,  $\text{CDCl}_3$ )  $\delta$  7.13-7.05 (m, 3H), 6.86 (t,  $J = 8.7$  Hz, 2H), 6.46- 6.43 (m, 2H), 5.10 (s, 1H), 2.20 (s, 6H).

**N-(4-methoxyphenyl)-[1,1'-biphenyl]-4-amine (2y)<sup>14</sup>**

According to the general procedure, the corresponding final product was obtained as a rufous solid.

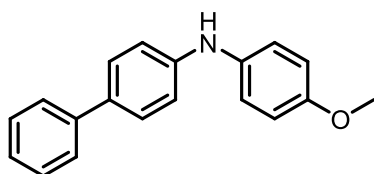

$^1\text{H NMR}$  (400 MHz,  $\text{CDCl}_3$ )  $\delta$  7.60 (s, 2H), 7.50 (d,  $J = 8.6$  Hz, 2H), 7.44 (t,  $J = 7.7$  Hz, 2H), 7.31 (t,  $J = 7.3$  Hz, 1H), 7.20-7.08 (m, 2H), 7.00 (d,  $J = 8.1$  Hz, 2H), 6.91 (d,  $J = 8.9$  Hz, 2H), 5.59 (s, 1H), 3.83 (s, 3H).

**N-(p-tolyl)-[1,1'-biphenyl]-4-amine (2z)<sup>8</sup>**

According to the general procedure, the corresponding final product was obtained as a yellow solid.

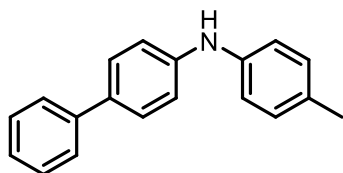

$^1\text{H NMR}$  (400 MHz,  $\text{CDCl}_3$ )  $\delta$  7.60 (d,  $J = 7.0$  Hz, 2H), 7.53 (d,  $J = 8.6$  Hz, 2H), 7.45 (t,  $J = 7.7$  Hz, 2H), 7.33 (t,  $J = 7.4$  Hz, 1H), 7.18-7.13 (m, 2H), 7.09 (dd,  $J = 11.7, 8.5$  Hz, 4H), 5.70 (s, 1H), 2.36 (s, 3H).

**N-mesityl-[1,1'-biphenyl]-4-amine (2aa)<sup>15</sup>**

According to the general procedure, the corresponding final product was obtained as pale-yellow oil.

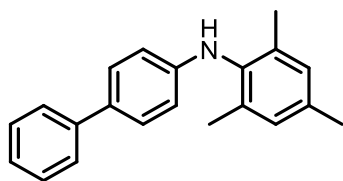

$^1\text{H NMR}$  (500 MHz,  $\text{CDCl}_3$ )  $\delta$  7.53 (d,  $J = 8.3$  Hz, 2H), 7.43-7.35 (m, 4H), 7.26-7.22 (m, 1H), 6.96 (s, 2H), 6.55 (d,  $J = 8.5$  Hz, 2H), 5.18 (s, 1H), 2.32 (s, 3H), 2.21 (s, 6H).

#### **N-(4-fluorophenyl)-[1,1'-biphenyl]-4-amine (2ab)<sup>16</sup>**

According to the general procedure, the corresponding final product was obtained as a white solid.

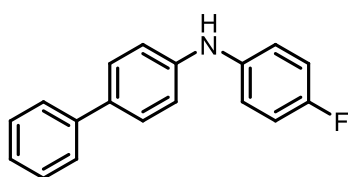

$^1\text{H NMR}$  (400 MHz,  $\text{CDCl}_3$ )  $\delta$  7.58 (d,  $J = 7.0$  Hz, 2H), 7.51 (d,  $J = 8.6$  Hz, 2H), 7.43 (t,  $J = 7.7$  Hz, 2H), 7.32 (t,  $J = 7.3$  Hz, 1H), 7.16-6.95 (m, 6H), 5.65 (s, 1H).

#### **N-(p-tolyl)naphthalen-2-amine (2ac)<sup>17</sup>**

According to the general procedure, the corresponding final product was obtained as a rufous solid.

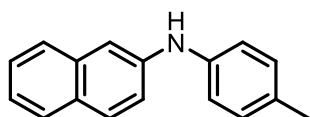

$^1\text{H NMR}$  (400 MHz,  $\text{CDCl}_3$ )  $\delta$  7.73 (d,  $J = 8.8$  Hz, 2H), 7.63 (dd,  $J = 8.3, 1.1$  Hz, 1H), 7.42-7.35 (m, 2H), 7.28 (ddd,  $J = 8.3, 6.9, 1.3$  Hz, 1H), 7.19 (dd,  $J = 8.8, 2.4$  Hz, 1H), 7.13 (q,  $J = 8.5$  Hz, 4H), 5.82 (s, 1H), 2.35 (s, 3H).

#### **N-(4-methoxyphenyl)naphthalen-2-amine (2ad)<sup>18</sup>**

According to the general procedure, the corresponding final product was obtained as a pale-white solid.

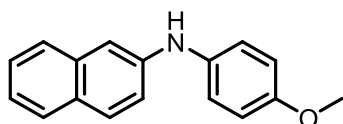

$^1\text{H NMR}$  (400 MHz,  $\text{CDCl}_3$ )  $\delta$  7.97-7.57 (m, 3H), 7.40-7.12 (m, 5H), 7.10-6.89 (m, 2H), 5.71 (s, 1H), 3.86 (s, 3H).

#### **N-(4-fluorophenyl)naphthalen-2-amine (2ae)<sup>18</sup>**

According to the general procedure, the corresponding final product was obtained as a white solid.

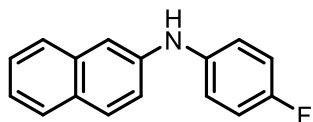

$^1\text{H}$  NMR (400 MHz,  $\text{CDCl}_3$ )  $\delta$  7.74 (d,  $J = 8.5$  Hz, 2H), 7.63 (d,  $J = 8.2$  Hz, 1H), 7.43-7.37 (m, 1H), 7.34-7.27 (m, 2H), 7.15 (ddd,  $J = 8.9, 5.2, 3.5$  Hz, 3H), 7.03 (t,  $J = 8.7$  Hz, 2H), 5.83 (s, 1H).

**di(naphthalen-2-yl)amine (2af)**<sup>19</sup>

According to the general procedure, the corresponding final product was obtained as a pale-brown solid.

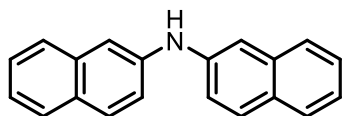

$^1\text{H}$  NMR (500 MHz,  $\text{CDCl}_3$ )  $\delta$  7.79 (t,  $J = 8.1$  Hz, 4H), 7.69 (d,  $J = 8.2$  Hz, 2H), 7.54 (d,  $J = 2.3$  Hz, 2H), 7.44 (ddd,  $J = 8.2, 6.6, 1.3$  Hz, 2H), 7.40-7.29 (m, 4H), 6.04 (s, 1H).

**N-(naphthalen-2-yl)naphthalen-1-amine (2ag)**<sup>20</sup>

According to the general procedure, the corresponding final product was obtained as a pale-brown solid.

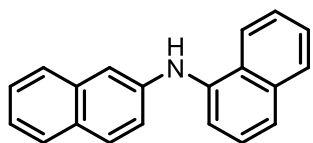

$^1\text{H}$  NMR (500 MHz,  $\text{CDCl}_3$ )  $\delta$  8.09 (d,  $J = 8.3$  Hz, 1H), 7.96-7.89 (m, 1H), 7.78 (dd,  $J = 8.4, 3.6$  Hz, 2H), 7.65 (dd,  $J = 6.8, 2.6$  Hz, 1H), 7.61 (d,  $J = 8.2$  Hz, 1H), 7.57-7.44 (m, 4H), 7.41 (t,  $J = 7.5$  Hz, 1H), 7.34-7.26 (m, 3H), 6.13 (s, 1H).

**N-mesitylnaphthalen-2-amine (2ah)**<sup>21</sup>

According to the general procedure, the corresponding final product was obtained as brown oil.

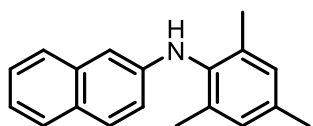

$^1\text{H}$  NMR (500 MHz,  $\text{CDCl}_3$ )  $\delta$  7.69 (t,  $J = 8.1$  Hz, 2H), 7.51 (d,  $J = 8.2$  Hz, 1H), 7.38-7.30 (m, 1H), 7.26-7.19 (m, 1H), 7.01 (s, 2H), 6.96 (dd,  $J = 8.7, 2.4$  Hz, 1H), 6.57 (d,  $J = 2.4$  Hz, 1H), 5.27 (s, 1H), 2.37 (s, 3H), 2.22 (s, 6H).

**di(naphthalen-1-yl)amine (2ai)**<sup>22</sup>

According to the general procedure, the corresponding final product was obtained as a rufous solid.

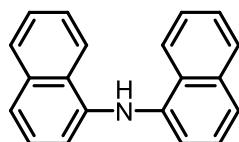

$^1\text{H}$  NMR (500 MHz,  $\text{CDCl}_3$ )  $\delta$  8.10 (d,  $J = 8.7$  Hz, 2H), 7.92 (d,  $J = 8.1$  Hz, 2H), 7.63-7.46 (m, 6H), 7.37 (t,  $J = 7.8$  Hz, 2H), 7.05 (dd,  $J = 7.4, 1.1$  Hz, 2H), 6.36 (s, 1H).

**N-mesitylnaphthalen-1-amine (2aj)**<sup>8</sup>

According to the general procedure, the corresponding final product was obtained as rufous oil.

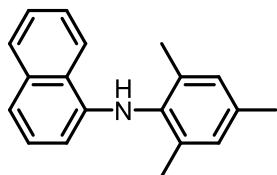

$^1\text{H}$  NMR (500 MHz,  $\text{CDCl}_3$ )  $\delta$  8.14-8.06 (m, 1H), 7.92-7.83 (m, 1H), 7.53 (dq,  $J = 6.2, 3.7$  Hz, 2H), 7.31 (d,  $J = 8.1$  Hz, 1H), 7.23 (t,  $J = 7.8$  Hz, 1H), 7.01 (s, 2H), 6.23 (d,  $J = 7.5$  Hz, 1H), 5.68 (s, 1H), 2.36 (s, 3H), 2.19 (s, 6H).

**N-phenylpyridin-3-amine (6a)**<sup>7</sup>

According to the general procedure, the corresponding final product was obtained as a white solid.

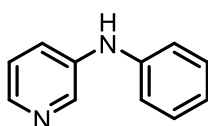

$^1\text{H}$  NMR (400 MHz,  $\text{CDCl}_3$ )  $\delta$  8.38 (d,  $J = 2.8$  Hz, 1H), 8.16 (dd,  $J = 4.7, 1.4$  Hz, 1H), 7.41 (ddd,  $J = 8.3, 2.8, 1.4$  Hz, 1H), 7.34-7.27 (m, 2H), 7.20-7.14 (m, 1H), 7.09 (d,  $J = 7.5$  Hz, 2H), 7.00 (t,  $J = 7.4$  Hz, 1H), 5.85 (s, 1H).

**N-(4-methoxyphenyl)pyridin-3-amine (6b)**<sup>9</sup>

According to the general procedure, the corresponding final product was obtained as a pale-yellow solid.

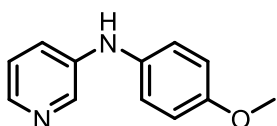

$^1\text{H}$  NMR (400 MHz,  $\text{CDCl}_3$ )  $\delta$  8.25 (d,  $J = 2.8$  Hz, 1H), 8.06 (dd,  $J = 4.6, 1.4$  Hz, 1H), 7.20 (ddd,  $J = 8.3, 2.8, 1.4$  Hz, 1H), 7.13-7.05 (m, 3H), 6.88 (d,  $J = 8.9$  Hz, 2H), 5.64 (s, 1H), 3.80 (s, 3H).

**N-(p-tolyl)pyridin-3-amine (6c)**<sup>8</sup>

According to the general procedure, the corresponding final product was obtained as a white solid.

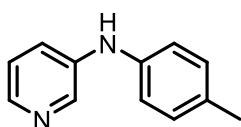

<sup>1</sup>H NMR (400 MHz, CDCl<sub>3</sub>) δ 8.33 (d, *J* = 2.8 Hz, 1H), 8.11 (dd, *J* = 4.7, 1.4 Hz, 1H), 7.33 (ddd, *J* = 8.3, 2.8, 1.4 Hz, 1H), 7.16-7.08 (m, 3H), 7.01 (d, *J* = 8.4 Hz, 2H), 5.79 (s, 1H), 2.32 (s, 3H).

#### 6-methoxy-N-phenylpyridin-2-amine (6d)<sup>23</sup>

According to the general procedure, the corresponding final product was obtained as yellow oil.

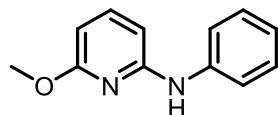

<sup>1</sup>H NMR (400 MHz, CDCl<sub>3</sub>) δ 7.41-7.37 (m, 3H), 7.35-7.29 (m, 2H), 7.03 (t, *J* = 7.2 Hz, 1H), 6.42 (s, 1H), 6.41 (d, *J* = 3.3 Hz, 1H), 6.20 (dd, *J* = 8.0, 0.6 Hz, 1H), 3.91 (s, 3H).

#### 6-methoxy-N-(4-methoxyphenyl)pyridin-2-amine (6e)

According to the general procedure, the corresponding final product was obtained as brown oil.

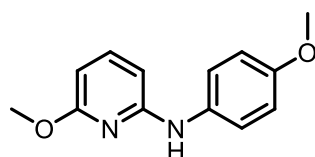

<sup>1</sup>H NMR (400 MHz, CDCl<sub>3</sub>) δ 7.36 (t, *J* = 7.9 Hz, 1H, CH<sub>Ar</sub>), 7.27 (d, *J* = 8.9 Hz, 2H, CH<sub>Ar</sub>), 6.89 (d, *J* = 8.9 Hz, 2H, CH<sub>Ar</sub>), 6.25 (s, 1H, NH), 6.22 (d, *J* = 7.9 Hz, 1H, CH<sub>Ar</sub>), 6.14 (dd, *J* = 7.9, 0.6 Hz, 1H, CH<sub>Ar</sub>), 3.89 (s, 3H, OCH<sub>3</sub>), 3.81 (s, 3H, OCH<sub>3</sub>).

<sup>13</sup>C NMR (126 MHz, CDCl<sub>3</sub>) δ 163.74 (C<sub>Ar</sub>), 156.03 (C<sub>Ar</sub>), 155.79 (C<sub>Ar</sub>), 140.29 (CH<sub>Ar</sub>), 133.60 (C<sub>Ar</sub>), 123.57 (CH<sub>Ar</sub>), 114.57 (CH<sub>Ar</sub>), 99.33 (CH<sub>Ar</sub>), 98.71 (CH<sub>Ar</sub>), 55.65 (OCH<sub>3</sub>), 53.46 (OCH<sub>3</sub>).  
HRMS: Calcd. For C<sub>13</sub>H<sub>15</sub>N<sub>2</sub>O<sub>2</sub> ([M+H]<sup>+</sup>): 231.1128, Found: 231.1127

#### 6-methoxy-N-(p-tolyl)pyridin-2-amine (6f)

According to the general procedure, the corresponding final product was obtained as brown oil.

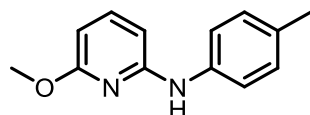

<sup>1</sup>H NMR (400 MHz, CDCl<sub>3</sub>) δ 7.38 (t, *J* = 7.9 Hz, 1H, CH<sub>Ar</sub>), 7.25 (d, *J* = 8.4 Hz, 2H, CH<sub>Ar</sub>), 7.13 (d, *J* = 8.2 Hz, 2H, CH<sub>Ar</sub>), 6.34 (d, *J* = 7.8 Hz, 2H, CH<sub>Ar</sub>), 6.17 (d, *J* = 7.9 Hz, 1H, CH<sub>Ar</sub>), 3.90 (s, 3H, OCH<sub>3</sub>), 2.33 (s, 3H, CH<sub>3</sub>).

<sup>13</sup>C NMR (126 MHz, CDCl<sub>3</sub>) δ 163.70 (C<sub>Ar</sub>), 154.97 (C<sub>Ar</sub>), 140.27 (CH<sub>Ar</sub>), 138.05 (C<sub>Ar</sub>), 132.35 (C<sub>Ar</sub>), 129.81 (CH<sub>Ar</sub>), 120.75 (CH<sub>Ar</sub>), 99.77 (CH<sub>Ar</sub>), 99.32 (CH<sub>Ar</sub>), 53.49 (OCH<sub>3</sub>), 20.91 (CH<sub>3</sub>).  
HRMS: Calcd. For C<sub>13</sub>H<sub>15</sub>N<sub>2</sub>O ([M+H]<sup>+</sup>): 215.1179, Found: 215.1180

#### N-(4-fluorophenyl)-6-methoxypyridin-2-amine (6g)

According to the general procedure, the corresponding final product was obtained as brown oil.

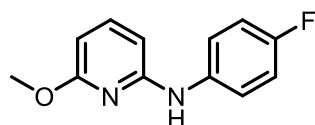

$^1\text{H}$  NMR (400 MHz,  $\text{CDCl}_3$ )  $\delta$  7.40 (t,  $J = 7.9$  Hz, 1H,  $\text{CH}_{\text{Ar}}$ ), 7.36-7.30 (m, 2H,  $\text{CH}_{\text{Ar}}$ ), 7.05-6.99 (m, 2H,  $\text{CH}_{\text{Ar}}$ ), 6.31 (s, 1H, NH), 6.27 (dd,  $J = 7.9, 0.6$  Hz, 1H,  $\text{CH}_{\text{Ar}}$ ), 6.19 (dd,  $J = 7.9, 0.6$  Hz, 1H,  $\text{CH}_{\text{Ar}}$ ), 3.89 (s, 3H,  $\text{OCH}_3$ ).

$^{13}\text{C}$  NMR (126 MHz,  $\text{CDCl}_3$ )  $\delta$  163.69 ( $\text{C}_{\text{Ar}}$ ), 158.77 (d,  $J = 241.6$  Hz,  $\text{C}_{\text{Ar}}$ ), 154.84 ( $\text{C}_{\text{Ar}}$ ), 140.39 ( $\text{CH}_{\text{Ar}}$ ), 136.67 (d,  $J = 2.7$  Hz,  $\text{C}_{\text{Ar}}$ ), 122.39 (d,  $J = 7.8$  Hz,  $\text{CH}_{\text{Ar}}$ ), 115.87 (d,  $J = 22.4$  Hz,  $\text{CH}_{\text{Ar}}$ ), 100.08 ( $\text{CH}_{\text{Ar}}$ ), 99.40 ( $\text{CH}_{\text{Ar}}$ ), 53.56 ( $\text{OCH}_3$ ).

HRMS: Calcd. For  $\text{C}_{12}\text{H}_{12}\text{FN}_2\text{O}$  ( $[\text{M}+\text{H}]^+$ ): 219.0928, Found: 219.0919

#### 6-methoxy-N-(pyridin-3-yl)pyridin-2-amine (6h)

According to the general procedure, the corresponding final product was obtained as a yellow solid.

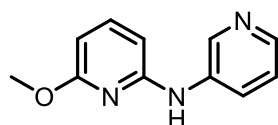

$^1\text{H}$  NMR (400 MHz,  $\text{CDCl}_3$ )  $\delta$  8.69 (d,  $J = 2.7$  Hz, 1H,  $\text{CH}_{\text{Ar}}$ ), 8.23 (dd,  $J = 4.8, 1.4$  Hz, 1H,  $\text{CH}_{\text{Ar}}$ ), 7.97 (ddd,  $J = 8.3, 2.7, 1.4$  Hz, 1H,  $\text{CH}_{\text{Ar}}$ ), 7.44 (t,  $J = 7.9$  Hz, 1H,  $\text{CH}_{\text{Ar}}$ ), 7.24 (dd,  $J = 8.4, 4.8$  Hz, 1H,  $\text{CH}_{\text{Ar}}$ ), 6.61 (s, 1H, NH), 6.33 (d,  $J = 7.8$  Hz, 1H,  $\text{CH}_{\text{Ar}}$ ), 6.26 (d,  $J = 8.0$  Hz, 1H,  $\text{CH}_{\text{Ar}}$ ), 3.91 (s, 3H,  $\text{OCH}_3$ ).

$^{13}\text{C}$  NMR (126 MHz,  $\text{CDCl}_3$ )  $\delta$  163.64 ( $\text{C}_{\text{Ar}}$ ), 153.78 ( $\text{C}_{\text{Ar}}$ ), 142.65 ( $\text{CH}_{\text{Ar}}$ ), 141.11 ( $\text{CH}_{\text{Ar}}$ ), 140.36 ( $\text{CH}_{\text{Ar}}$ ), 137.97 ( $\text{C}_{\text{Ar}}$ ), 125.81 ( $\text{CH}_{\text{Ar}}$ ), 123.74 ( $\text{CH}_{\text{Ar}}$ ), 101.06 ( $\text{CH}_{\text{Ar}}$ ), 101.01 ( $\text{CH}_{\text{Ar}}$ ), 53.73 ( $\text{OCH}_3$ ).

HRMS: Calcd. For  $\text{C}_{11}\text{H}_{12}\text{N}_3\text{O}$  ( $[\text{M}+\text{H}]^+$ ): 202.0975, Found: 219.0974

#### N-(6-methoxypyridin-2-yl)quinolin-3-amine (6i)

According to the general procedure, the corresponding final product was obtained as a pale-yellow solid.

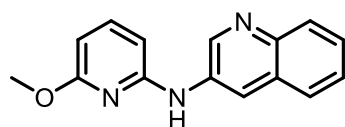

$^1\text{H}$  NMR (500 MHz,  $\text{CDCl}_3$ )  $\delta$  8.90 (d,  $J = 2.7$  Hz, 1H,  $\text{CH}_{\text{Ar}}$ ), 8.49 (d,  $J = 2.6$  Hz, 1H,  $\text{CH}_{\text{Ar}}$ ), 8.03 (d,  $J = 8.2$  Hz, 1H,  $\text{CH}_{\text{Ar}}$ ), 7.71 (dd,  $J = 8.1, 1.5$  Hz, 1H,  $\text{CH}_{\text{Ar}}$ ), 7.59-7.53 (m, 1H,  $\text{CH}_{\text{Ar}}$ ), 7.48 (dt,  $J = 15.6, 7.9$  Hz, 2H,  $\text{CH}_{\text{Ar}}$ ), 6.92 (s, 1H, NH), 6.40 (d,  $J = 7.7$  Hz, 1H,  $\text{CH}_{\text{Ar}}$ ), 6.30 (d,  $J = 8.0$  Hz, 1H,  $\text{CH}_{\text{Ar}}$ ), 3.98 (s, 3H,  $\text{OCH}_3$ ).

$^{13}\text{C}$  NMR (126 MHz,  $\text{CDCl}_3$ )  $\delta$  163.65 ( $\text{C}_{\text{Ar}}$ ), 153.65 ( $\text{C}_{\text{Ar}}$ ), 145.34 ( $\text{C}_{\text{Ar}}$ ), 144.02 ( $\text{CH}_{\text{Ar}}$ ), 140.37 ( $\text{CH}_{\text{Ar}}$ ), 134.69 ( $\text{C}_{\text{Ar}}$ ), 129.07 ( $\text{C}_{\text{Ar}}$ ), 128.82 ( $\text{CH}_{\text{Ar}}$ ), 127.19 ( $\text{CH}_{\text{Ar}}$ ), 127.17 ( $\text{CH}_{\text{Ar}}$ ), 127.12 ( $\text{CH}_{\text{Ar}}$ ), 120.77 ( $\text{CH}_{\text{Ar}}$ ), 101.39 ( $\text{CH}_{\text{Ar}}$ ), 101.11 ( $\text{CH}_{\text{Ar}}$ ), 53.74 ( $\text{OCH}_3$ ).

HRMS: Calcd. For  $\text{C}_{15}\text{H}_{14}\text{N}_3\text{O}$  ( $[\text{M}+\text{H}]^+$ ): 252.1131, Found: 252.1132

#### N-phenylquinolin-4-amine (6j)<sup>24</sup>

According to the general procedure, the corresponding final product was obtained as a pale-yellow solid.

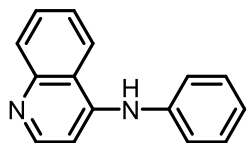

$^1\text{H NMR}$  (400 MHz,  $\text{CDCl}_3$ )  $\delta$  8.56 (d,  $J = 5.3$  Hz, 1H), 8.05 (dd,  $J = 8.5, 1.2$  Hz, 1H), 7.97 (dd,  $J = 8.4, 1.3$  Hz, 1H), 7.68 (t,  $J = 7.0$  Hz, 1H), 7.50 (t,  $J = 7.0$  Hz, 1H), 7.46-7.38 (m, 2H), 7.31 (d,  $J = 7.3$  Hz, 2H), 7.19 (t,  $J = 7.4$  Hz, 1H), 6.99 (d,  $J = 5.2$  Hz, 1H), 6.89 (s, 1H).

#### **N-(p-tolyl)quinolin-4-amine (6k)**<sup>24</sup>

According to the general procedure, the corresponding final product was obtained as a pale-yellow solid.

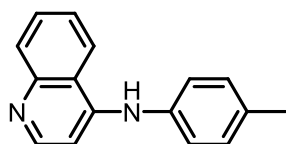

$^1\text{H NMR}$  (400 MHz,  $\text{CDCl}_3$ )  $\delta$  8.52 (d,  $J = 5.3$  Hz, 1H), 8.03 (dd,  $J = 8.5, 1.3$  Hz, 1H), 7.96 (dd,  $J = 8.4, 1.3$  Hz, 1H), 7.66 (t,  $J = 7.9$  Hz, 1H), 7.47 (t,  $J = 8.3$  Hz, 1H), 7.25-7.16 (m, 4H), 6.90 (d,  $J = 8.3$  Hz, 1H), 6.87 (s, 1H), 2.38 (s, 3H).

#### **N-(4-fluorophenyl)quinolin-4-amine (6l)**<sup>24</sup>

According to the general procedure, the corresponding final product was obtained as a pale-yellow solid.

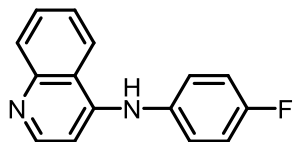

$^1\text{H NMR}$  (400 MHz,  $\text{CDCl}_3$ )  $\delta$  8.53 (d,  $J = 5.3$  Hz, 1H), 8.04 (dd,  $J = 8.5, 1.3$  Hz, 1H), 7.96 (dd,  $J = 8.3, 1.3$  Hz, 1H), 7.70 (ddd,  $J = 8.7, 4.0, 2.4$  Hz, 1H), 7.53-7.49 (m, 1H), 7.31-7.26 (m, 2H), 7.12 (t,  $J = 8.6$  Hz, 2H), 6.78 (s, 1H), 6.77 (s, 1H).

#### **N-(pyridin-3-yl)quinolin-4-amine (6m)**

According to the general procedure, the corresponding final product was obtained as a pale-yellow solid.

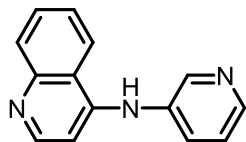

$^1\text{H NMR}$  (400 MHz,  $\text{DMSO-d}_6$ )  $\delta$  8.67 (d,  $J = 2.6$  Hz, 1H,  $\text{CH}_{\text{Ar}}$ ), 8.59 (dd,  $J = 8.5, 1.3$  Hz, 1H,  $\text{CH}_{\text{Ar}}$ ), 8.50 (d,  $J = 5.8$  Hz, 1H,  $\text{CH}_{\text{Ar}}$ ), 8.42 (d,  $J = 1.5$  Hz, 1H,  $\text{CH}_{\text{Ar}}$ ), 7.97 (d,  $J = 8.4$  Hz, 1H,  $\text{CH}_{\text{Ar}}$ ), 7.89-7.79 (m, 2H,  $\text{CH}_{\text{Ar}}$ ), 7.67-7.60 (m, 1H,  $\text{CH}_{\text{Ar}}$ ), 7.48 (dd,  $J = 8.3, 4.2$  Hz, 1H,  $\text{CH}_{\text{Ar}}$ ), 6.91 (d,  $J = 5.8$  Hz, 1H,  $\text{CH}_{\text{Ar}}$ ).

$^{13}\text{C}$  NMR (101 MHz, DMSO- $d_6$ )  $\delta$  172.50 ( $\text{CH}_{\text{Ar}}$ ), 150.25 ( $\text{C}_{\text{Ar}}$ ), 148.69 ( $\text{CH}_{\text{Ar}}$ ), 145.97 ( $\text{C}_{\text{Ar}}$ ), 145.26 ( $\text{CH}_{\text{Ar}}$ ), 137.03 ( $\text{C}_{\text{Ar}}$ ), 131.32 ( $\text{CH}_{\text{Ar}}$ ), 130.77 ( $\text{CH}_{\text{Ar}}$ ), 126.83 ( $\text{CH}_{\text{Ar}}$ ), 126.10 ( $\text{CH}_{\text{Ar}}$ ), 124.67 ( $\text{CH}_{\text{Ar}}$ ), 123.26 ( $\text{CH}_{\text{Ar}}$ ), 119.61 ( $\text{C}_{\text{Ar}}$ ), 101.73 ( $\text{CH}_{\text{Ar}}$ ).

HRMS: Calcd. For  $\text{C}_{14}\text{H}_{11}\text{N}_3\text{Na}$  ( $[\text{M}+\text{Na}]^+$ ): 244.0845, Found: 244.0854

#### **N-(quinolin-4-yl)quinolin-3-amine (6n)**

According to the general procedure, the corresponding final product was obtained as a pale-yellow solid.

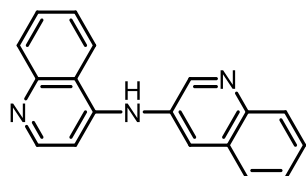

$^1\text{H}$  NMR (500 MHz,  $\text{CDCl}_3$ )  $\delta$  8.90 (d,  $J = 2.6$  Hz, 1H,  $\text{CH}_{\text{Ar}}$ ), 8.61 (d,  $J = 5.2$  Hz, 1H,  $\text{CH}_{\text{Ar}}$ ), 8.09 (q,  $J = 8.2$  Hz, 3H,  $\text{CH}_{\text{Ar}}$ ), 8.00 (d,  $J = 2.6$  Hz, 1H,  $\text{CH}_{\text{Ar}}$ ), 7.77-7.72 (m, 1H,  $\text{CH}_{\text{Ar}}$ ), 7.67 (dt,  $J = 20.2, 7.6$  Hz, 2H,  $\text{CH}_{\text{Ar}}$ ), 7.52 (dt,  $J = 25.6, 7.6$  Hz, 3H,  $\text{CH}_{\text{Ar}}$ ), 7.03 (d,  $J = 5.2$  Hz, 1H,  $\text{CH}_{\text{Ar}}$ ).

$^{13}\text{C}$  NMR (126 MHz,  $\text{CDCl}_3$ )  $\delta$  150.91 ( $\text{CH}_{\text{Ar}}$ ), 149.24 ( $\text{C}_{\text{Ar}}$ ), 147.32 ( $\text{C}_{\text{Ar}}$ ), 147.30 ( $\text{C}_{\text{Ar}}$ ), 145.43 ( $\text{CH}_{\text{Ar}}$ ), 134.09 ( $\text{C}_{\text{Ar}}$ ), 130.16 ( $\text{C}_{\text{Ar}}$ ), 129.88 ( $\text{CH}_{\text{Ar}}$ ), 129.37 ( $\text{CH}_{\text{Ar}}$ ), 128.60 ( $\text{CH}_{\text{Ar}}$ ), 128.49 ( $\text{CH}_{\text{Ar}}$ ), 127.62 ( $\text{CH}_{\text{Ar}}$ ), 127.19 ( $\text{CH}_{\text{Ar}}$ ), 125.89 ( $\text{CH}_{\text{Ar}}$ ), 125.59 ( $\text{CH}_{\text{Ar}}$ ), 120.24 ( $\text{C}_{\text{Ar}}$ ), 120.15 ( $\text{CH}_{\text{Ar}}$ ), 102.90 ( $\text{CH}_{\text{Ar}}$ ).

HRMS: Calcd. For  $\text{C}_{18}\text{H}_{14}\text{N}_3$  ( $[\text{M}+\text{H}]^+$ ): 272.1182, Found: 271.1180

#### **N-(4-methoxyphenyl)quinolin-5-amine (6o)<sup>25</sup>**

According to the general procedure, the corresponding final product was obtained as a yellow solid.

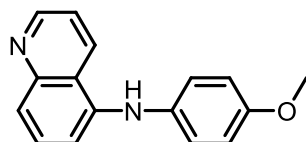

$^1\text{H}$  NMR (500 MHz,  $\text{CDCl}_3$ )  $\delta$  8.90 (dd,  $J = 4.3, 1.6$  Hz, 1H), 8.34 (d,  $J = 8.5$  Hz, 1H), 7.69 (d,  $J = 8.3$  Hz, 1H), 7.54 (t,  $J = 8.0$  Hz, 1H), 7.35 (dd,  $J = 8.5, 4.2$  Hz, 1H), 7.12 (d,  $J = 7.6$  Hz, 1H), 7.04 (d,  $J = 8.8$  Hz, 2H), 6.88 (d,  $J = 8.9$  Hz, 2H), 5.92 (s, 1H), 3.81 (s, 3H).

#### **N-mesitylquinolin-5-amine (6p)<sup>26</sup>**

According to the general procedure, the corresponding final product was obtained as a yellow solid.

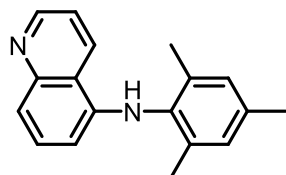

$^1\text{H}$  NMR (400 MHz,  $\text{CDCl}_3$ )  $\delta$  8.93 (dd,  $J = 4.2, 1.6$  Hz, 1H), 8.43 (d,  $J = 8.5$  Hz, 1H), 7.55 (d,  $J = 8.4$  Hz, 1H), 7.46-7.39 (m, 2H), 6.99 (s, 2H), 6.25 (d,  $J = 8.7$  Hz, 1H), 5.68 (s, 1H), 2.34 (s, 3H), 2.16 (s, 6H).

**N-phenylbenzo[d][1,3]dioxol-5-amine (6q)**<sup>27</sup>

According to the general procedure, the corresponding final product was obtained as brown oil.

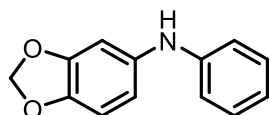

$^1\text{H}$  NMR (400 MHz,  $\text{CDCl}_3$ )  $\delta$  7.26-7.20 (m, 2H), 6.94 (d,  $J = 7.5$  Hz, 2H), 6.87 (t,  $J = 7.3$  Hz, 1H), 6.75 (d,  $J = 8.3$  Hz, 1H), 6.70 (d,  $J = 2.2$  Hz, 1H), 6.56 (dd,  $J = 8.3, 2.3$  Hz, 1H), 5.94 (s, 2H), 5.53 (s, 1H).

**N-(p-tolyl)benzo[d][1,3]dioxol-5-amine (6r)**<sup>28</sup>

According to the general procedure, the corresponding final product was obtained as brown oil.

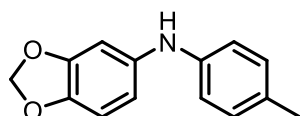

$^1\text{H}$  NMR (400 MHz,  $\text{CDCl}_3$ )  $\delta$  7.05 (d,  $J = 7.8$  Hz, 2H), 6.88 (d,  $J = 8.4$  Hz, 2H), 6.72 (d,  $J = 8.3$  Hz, 1H), 6.65 (d,  $J = 2.2$  Hz, 1H), 6.50 (dd,  $J = 8.3, 2.3$  Hz, 1H), 5.92 (s, 2H), 5.41 (s, 1H), 2.29 (s, 3H).

**N-(4-methoxyphenyl)benzo[d][1,3]dioxol-5-amine (6s)**<sup>29</sup>

According to the general procedure, the corresponding final product was obtained as brown oil.

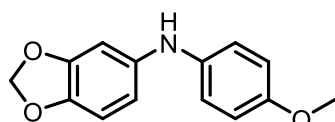

$^1\text{H}$  NMR (400 MHz,  $\text{CDCl}_3$ )  $\delta$  6.97 (d,  $J = 8.9$  Hz, 2H), 6.83 (d,  $J = 8.9$  Hz, 2H), 6.69 (d,  $J = 8.3$  Hz, 1H), 6.56 (d,  $J = 2.3$  Hz, 1H), 6.40 (d,  $J = 7.7$  Hz, 1H), 5.90 (s, 2H), 3.79 (s, 3H).

**N-(4-fluorophenyl)benzo[d][1,3]dioxol-5-amine (6t)**<sup>30</sup>

According to the general procedure, the corresponding final product was obtained as brown oil.

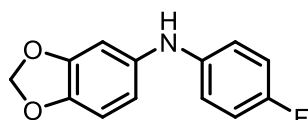

$^1\text{H}$  NMR (400 MHz,  $\text{CDCl}_3$ )  $\delta$  6.96-6.87 (m, 4H), 6.72 (d,  $J = 8.3$  Hz, 1H), 6.61 (d,  $J = 2.2$  Hz, 1H), 6.47 (dd,  $J = 8.3, 2.3$  Hz, 1H), 5.93 (s, 2H), 5.37 (s, 1H).

**N-mesitylbenzo[d][1,3]dioxol-5-amine (6u)**<sup>31</sup>

According to the general procedure, the corresponding final product was obtained as a white solid.

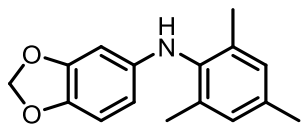

$^1\text{H NMR}$  (400 MHz,  $\text{CDCl}_3$ )  $\delta$  6.93 (s, 2H), 6.62 (d,  $J = 8.3$  Hz, 1H), 6.12 (d,  $J = 2.3$  Hz, 1H), 5.95 (dd,  $J = 8.3, 2.3$  Hz, 1H), 5.85 (s, 2H), 4.98 (s, 1H), 2.30 (s, 3H), 2.18 (s, 6H).

**N-(benzo[d][1,3]dioxol-5-yl)pyridin-3-amine (6v)**

According to the general procedure, the corresponding final product was obtained as a yellow solid.

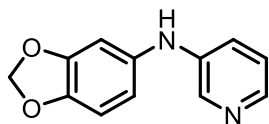

$^1\text{H NMR}$  (400 MHz,  $\text{CDCl}_3$ )  $\delta$  8.25 (d,  $J = 2.9$  Hz, 1H,  $\text{CH}_{\text{Ar}}$ ), 8.07 (dd,  $J = 4.7, 1.4$  Hz, 1H,  $\text{CH}_{\text{Ar}}$ ), 7.23 (ddd,  $J = 8.3, 2.8, 1.4$  Hz, 1H,  $\text{CH}_{\text{Ar}}$ ), 7.10 (dd,  $J = 8.3, 4.6$  Hz, 1H,  $\text{CH}_{\text{Ar}}$ ), 6.74 (d,  $J = 8.2$  Hz, 1H,  $\text{CH}_{\text{Ar}}$ ), 6.66 (d,  $J = 2.2$  Hz, 1H,  $\text{CH}_{\text{Ar}}$ ), 6.56 (dd,  $J = 8.2, 2.2$  Hz, 1H,  $\text{CH}_{\text{Ar}}$ ), 5.94 (s, 3H, NH and O- $\text{CH}_2$ -O overlapped).

$^{13}\text{C NMR}$  (101 MHz,  $\text{CDCl}_3$ )  $\delta$  148.48 (O- $\text{C}_{\text{Ar}}$ ), 143.68 (O- $\text{C}_{\text{Ar}}$ ), 141.53 ( $\text{C}_{\text{Ar}}$ ), 140.84 ( $\text{C}_{\text{Ar}}$ ), 138.74 ( $\text{CH}_{\text{Ar}}$ ), 136.04 ( $\text{CH}_{\text{Ar}}$ ), 123.82 ( $\text{CH}_{\text{Ar}}$ ), 121.83 ( $\text{CH}_{\text{Ar}}$ ), 113.70 ( $\text{CH}_{\text{Ar}}$ ), 108.77 ( $\text{CH}_{\text{Ar}}$ ), 103.06 (O- $\text{CH}_2$ -O), 101.33 ( $\text{CH}_{\text{Ar}}$ ).

HRMS: Calcd. For  $\text{C}_{12}\text{H}_{11}\text{N}_2\text{O}_2$  ( $[\text{M}+\text{H}]^+$ ): 215.0815, Found: 215.0814

**N-(benzo[d][1,3]dioxol-5-yl)quinolin-3-amine (6w)**

According to the general procedure, the corresponding final product was obtained as a yellow solid.

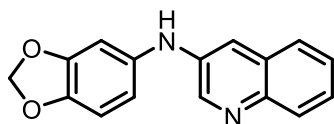

$^1\text{H NMR}$  (500 MHz,  $\text{CDCl}_3$ )  $\delta$  8.61 (d,  $J = 2.8$  Hz, 1H,  $\text{CH}_{\text{Ar}}$ ), 7.97 (d,  $J = 8.1$  Hz, 1H,  $\text{CH}_{\text{Ar}}$ ), 7.58 (d,  $J = 7.9$  Hz, 1H,  $\text{CH}_{\text{Ar}}$ ), 7.53-7.41 (m, 3H,  $\text{CH}_{\text{Ar}}$ ), 6.83-6.74 (m, 2H,  $\text{CH}_{\text{Ar}}$ ), 6.65 (dd,  $J = 8.2, 2.2$  Hz, 1H,  $\text{CH}_{\text{Ar}}$ ), 6.02 (s, 1H, NH), 5.97 (s, 2H, O- $\text{CH}_2$ -O).

$^{13}\text{C NMR}$  (126 MHz,  $\text{CDCl}_3$ )  $\delta$  148.57 (O- $\text{C}_{\text{Ar}}$ ), 144.33 (O- $\text{C}_{\text{Ar}}$ ), 143.90 ( $\text{C}_{\text{Ar}}$ ), 143.26 ( $\text{C}_{\text{Ar}}$ ), 138.72 ( $\text{C}_{\text{Ar}}$ ), 135.88 ( $\text{C}_{\text{Ar}}$ ), 129.10 ( $\text{CH}_{\text{Ar}}$ ), 129.05 ( $\text{CH}_{\text{Ar}}$ ), 127.20 ( $\text{CH}_{\text{Ar}}$ ), 126.39 ( $\text{CH}_{\text{Ar}}$ ), 126.16 ( $\text{CH}_{\text{Ar}}$ ), 114.94 ( $\text{CH}_{\text{Ar}}$ ), 113.91 ( $\text{CH}_{\text{Ar}}$ ), 108.90 ( $\text{CH}_{\text{Ar}}$ ), 103.17 (O- $\text{CH}_2$ -O), 101.42 ( $\text{CH}_{\text{Ar}}$ ).

HRMS: Calcd. For  $\text{C}_{16}\text{H}_{13}\text{N}_2\text{O}_2$  ( $[\text{M}+\text{H}]^+$ ): 265.0972, Found: 265.0970

**N-(p-tolyl)quinolin-2-amine (6x)<sup>32</sup>**

According to the general procedure, the corresponding final product was obtained as a pale-pink solid.

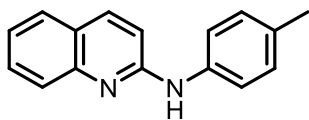

$^1\text{H NMR}$  (400 MHz,  $\text{CDCl}_3$ )  $\delta$  7.89 (dd,  $J = 8.9, 0.7$  Hz, 1H), 7.77 (d,  $J = 8.3$  Hz, 1H), 7.63 (dd,  $J = 7.9, 1.5$  Hz, 1H), 7.61-7.55 (m, 1H), 7.42 (d,  $J = 8.3$  Hz, 2H), 7.28 (t,  $J = 7.4$  Hz, 1H), 7.21-7.16 (m, 2H), 6.96 (d,  $J = 8.9$  Hz, 1H), 6.90 (s, 1H), 2.36 (s, 3H).

**N-(4-methoxyphenyl)quinolin-2-amine (6y)**<sup>33</sup>

According to the general procedure, the corresponding final product was obtained as a light-yellow solid.

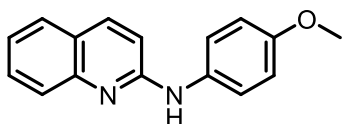

$^1\text{H NMR}$  (400 MHz,  $\text{CDCl}_3$ )  $\delta$  7.87 (dd,  $J = 9.0, 0.8$  Hz, 1H), 7.73 (dd,  $J = 8.4, 1.0$  Hz, 1H), 7.62 (d,  $J = 8.0$  Hz, 1H), 7.60-7.54 (m, 1H), 7.42 (d,  $J = 8.9$  Hz, 2H), 7.28 (d,  $J = 8.0$  Hz, 1H), 6.93 (d,  $J = 8.9$  Hz, 2H), 6.87 (d,  $J = 8.9$  Hz, 2H).

**N-(4-fluorophenyl)quinolin-2-amine (6z)**<sup>33</sup>

According to the general procedure, the corresponding final product was obtained as a light-yellow solid.

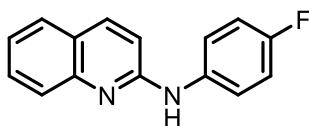

$^1\text{H NMR}$  (400 MHz,  $\text{CDCl}_3$ )  $\delta$  7.91 (dd,  $J = 8.9, 0.8$  Hz, 1H), 7.77 (dd,  $J = 8.4, 1.0$  Hz, 1H), 7.64 (d,  $J = 7.9$  Hz, 1H), 7.62-7.57 (m, 1H), 7.57-7.52 (m, 2H), 7.30 (t,  $J = 8.0$  Hz, 1H), 7.10-7.03 (m, 2H), 6.87 (d,  $J = 8.9$  Hz, 2H).

**N-(pyridin-3-yl)quinolin-2-amine (6aa)**<sup>2e</sup>

According to the general procedure, the corresponding final product was obtained as a yellow solid.

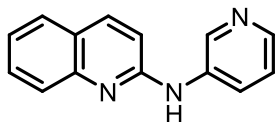

$^1\text{H NMR}$  (400 MHz,  $\text{CDCl}_3$ )  $\delta$  8.82 (s, 1H), 8.43 (d,  $J = 4.3$  Hz, 1H), 8.29 (s, 1H), 7.96 (d,  $J = 8.1$  Hz, 1H), 7.82 (d,  $J = 7.3$  Hz, 1H), 7.67 (dd,  $J = 8.0, 1.5$  Hz, 1H), 7.65 – 7.59 (m, 1H), 7.34 (ddd,  $J = 8.1, 6.9, 1.2$  Hz, 2H), 6.92 (d,  $J = 8.8$  Hz, 1H).

**N-(4-methoxyphenyl)quinolin-7-amine (6ab)**<sup>34</sup>

According to the general procedure, the corresponding final product was obtained as a yellow solid.

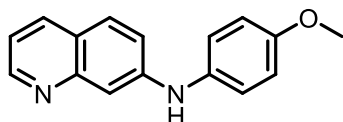

$^1\text{H}$  NMR (500 MHz,  $\text{CDCl}_3$ )  $\delta$  8.79-8.70 (m, 1H), 7.97 (d,  $J = 8.0$  Hz, 1H), 7.62 (d,  $J = 8.8$  Hz, 1H), 7.43 (d,  $J = 2.4$  Hz, 1H), 7.19 (d,  $J = 8.8$  Hz, 2H), 7.16-7.09 (m, 2H), 6.89 (d,  $J = 8.8$  Hz, 2H), 6.02 (s, 1H), 3.81 (s, 3H).

#### N-(pyridin-3-yl)quinolin-7-amine (6ac)

According to the general procedure, the corresponding final product was obtained as a yellow solid.

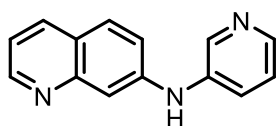

$^1\text{H}$  NMR (500 MHz,  $\text{CDCl}_3$ )  $\delta$  8.74 (d,  $J = 4.2$  Hz, 1H,  $\text{CH}_{\text{Ar}}$ ), 8.43 (s, 1H, NH), 8.16 (d,  $J = 4.7$  Hz, 1H,  $\text{CH}_{\text{Ar}}$ ), 7.96 (d,  $J = 8.1$  Hz, 1H,  $\text{CH}_{\text{Ar}}$ ), 7.69-7.54 (m, 4H,  $\text{CH}_{\text{Ar}}$ ), 7.24 (dd,  $J = 8.8$ , 2.4 Hz, 1H,  $\text{CH}_{\text{Ar}}$ ), 7.15 (dd,  $J = 8.1$ , 4.3 Hz, 1H,  $\text{CH}_{\text{Ar}}$ ), 7.09 (dd,  $J = 8.3$ , 4.6 Hz, 1H,  $\text{CH}_{\text{Ar}}$ ).  
 $^{13}\text{C}$  NMR (126 MHz,  $\text{CDCl}_3$ )  $\delta$  150.77 ( $\text{CH}_{\text{Ar}}$ ), 149.66 ( $\text{C}_{\text{Ar}}$ ), 144.20 ( $\text{C}_{\text{Ar}}$ ), 142.78 ( $\text{C}_{\text{Ar}}$ ), 141.41 ( $\text{CH}_{\text{Ar}}$ ), 138.86 ( $\text{C}_{\text{Ar}}$ ), 135.82 ( $\text{CH}_{\text{Ar}}$ ), 129.15 ( $\text{CH}_{\text{Ar}}$ ), 125.21 ( $\text{CH}_{\text{Ar}}$ ), 123.84 ( $\text{CH}_{\text{Ar}}$ ), 123.69 ( $\text{CH}_{\text{Ar}}$ ), 119.81 ( $\text{CH}_{\text{Ar}}$ ), 118.78 ( $\text{CH}_{\text{Ar}}$ ), 110.91 ( $\text{CH}_{\text{Ar}}$ ).

HRMS: Calcd. For  $\text{C}_{14}\text{H}_{12}\text{N}_3$  ( $[\text{M}+\text{H}]^+$ ): 222.1026, Found: 265.1024

#### N-(4-methoxyphenyl)quinolin-6-amine (6ad)<sup>11</sup>

According to the general procedure, the corresponding final product was obtained as a yellow solid.

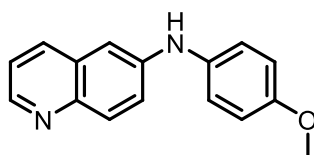

$^1\text{H}$  NMR (500 MHz,  $\text{CDCl}_3$ )  $\delta$  8.68 (dd,  $J = 4.2$ , 1.6 Hz, 1H), 7.96 (d,  $J = 9.0$  Hz, 1H), 7.89 (d,  $J = 8.8$  Hz, 1H), 7.32 (dd,  $J = 9.0$ , 2.6 Hz, 1H), 7.29-7.26 (m, 1H), 7.20 (d,  $J = 8.6$  Hz, 2H), 7.11 (d,  $J = 2.6$  Hz, 1H), 6.94 (d,  $J = 8.4$  Hz, 2H), 5.90 (s, 1H), 3.85 (s, 3H).

#### N-(quinolin-6-yl)quinolin-3-amine (6ae)

According to the general procedure, the corresponding final product was obtained as a yellow solid.

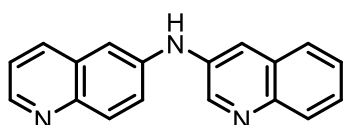

$^1\text{H}$  NMR (500 MHz,  $\text{DMSO}-d_6$ )  $\delta$  9.11 (s, 1H,  $\text{NH}_{\text{Ar}}$ ), 8.84 (d,  $J = 2.8$  Hz, 1H,  $\text{CH}_{\text{Ar}}$ ), 8.69 (d,  $J = 2.5$  Hz, 1H,  $\text{CH}_{\text{Ar}}$ ), 8.23 (dd,  $J = 8.3$ , 1.7 Hz, 1H,  $\text{CH}_{\text{Ar}}$ ), 8.11 (d,  $J = 2.8$  Hz, 1H,  $\text{CH}_{\text{Ar}}$ ),

7.97 (d,  $J = 9.0$  Hz, 1H, CH<sub>Ar</sub>), 7.95-7.90 (m, 1H, CH<sub>Ar</sub>), 7.90-7.84 (m, 1H, CH<sub>Ar</sub>), 7.73 (d,  $J = 2.7$  Hz, 1H, CH<sub>Ar</sub>), 7.64 (d,  $J = 9.0$  Hz, 1H, CH<sub>Ar</sub>), 7.56-7.50 (m, 2H, CH<sub>Ar</sub>), 7.43 (dd,  $J = 8.3, 4.2$  Hz, 1H, CH<sub>Ar</sub>).

<sup>13</sup>C NMR (126 MHz, DMSO-d<sub>6</sub>)  $\delta$  147.59 (C<sub>Ar</sub>), 145.45 (C<sub>Ar</sub>), 143.86 (C<sub>Ar</sub>), 142.88 (C<sub>Ar</sub>), 140.66 (CH<sub>Ar</sub>), 136.64 (CH<sub>Ar</sub>), 134.50 (C<sub>Ar</sub>), 130.20 (CH<sub>Ar</sub>), 129.27 (CH<sub>Ar</sub>), 128.64 (CH<sub>Ar</sub>), 128.50 (CH<sub>Ar</sub>), 126.90 (CH<sub>Ar</sub>), 126.25 (C<sub>Ar</sub>), 123.34 (CH<sub>Ar</sub>), 121.69 (CH<sub>Ar</sub>), 115.94 (CH<sub>Ar</sub>), 109.18 (CH<sub>Ar</sub>).

HRMS: Calcd. For C<sub>18</sub>H<sub>14</sub>N<sub>3</sub> ([M+H]<sup>+</sup>): 272.1182, Found: 272.1178

#### **N-(quinolin-3-yl)benzo[d]oxazol-2-amine (6af)**

According to the general procedure, the corresponding final product was obtained as a pale-white solid.

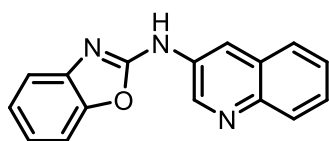

<sup>1</sup>H NMR (500 MHz, DMSO-d<sub>6</sub>)  $\delta$  11.19 (s, 1H, NH<sub>Ar</sub>), 9.02 (d,  $J = 2.6$  Hz, 1H, CH<sub>Ar</sub>), 8.87 (d,  $J = 2.7$  Hz, 1H, CH<sub>Ar</sub>), 7.98 (d,  $J = 9.4$  Hz, 2H, CH<sub>Ar</sub>), 7.68-7.52 (m, 4H, CH<sub>Ar</sub>), 7.28 (t,  $J = 7.4$  Hz, 1H, CH<sub>Ar</sub>), 7.22-7.16 (m, 1H, CH<sub>Ar</sub>).

<sup>13</sup>C NMR (126 MHz, DMSO-d<sub>6</sub>)  $\delta$  157.67 (C<sub>Ar</sub>), 147.18 (C<sub>Ar</sub>), 143.71 (C<sub>Ar</sub>), 143.60 (C<sub>Ar</sub>), 142.10 (CH<sub>Ar</sub>), 132.70 (C<sub>Ar</sub>), 128.64 (CH<sub>Ar</sub>), 128.01 (CH<sub>Ar</sub>), 127.44 (CH<sub>Ar</sub>), 127.35 (CH<sub>Ar</sub>), 127.29 (CH<sub>Ar</sub>), 124.23 (CH<sub>Ar</sub>), 122.18 (CH<sub>Ar</sub>), 119.11 (C<sub>Ar</sub>), 117.03 (CH<sub>Ar</sub>), 109.23 (CH<sub>Ar</sub>).

HRMS: Calcd. For C<sub>16</sub>H<sub>12</sub>N<sub>3</sub>O ([M+H]<sup>+</sup>): 262.0975, Found: 262.0974

#### **N-(thiophen-3-yl)quinolin-3-amine (6ag)**

According to the general procedure, the corresponding final product was obtained as a yellow solid.

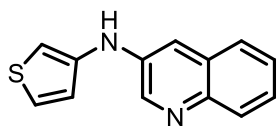

<sup>1</sup>H NMR (500 MHz, CDCl<sub>3</sub>)  $\delta$  8.63 (d,  $J = 2.9$  Hz, 1H, CH<sub>Ar</sub>), 7.99 (d,  $J = 7.0$  Hz, 1H, CH<sub>Ar</sub>), 7.67-7.56 (m, 2H, CH<sub>Ar</sub>), 7.52-7.41 (m, 2H, CH<sub>Ar</sub>), 7.33 (dd,  $J = 5.1, 3.1$  Hz, 1H, CH<sub>Ar</sub>), 7.00 (d,  $J = 5.1$  Hz, 1H, CH<sub>Ar</sub>), 6.90 (s, 1H, CH<sub>Ar</sub>), 6.28 (s, 1H, NH).

<sup>13</sup>C NMR (126 MHz, CDCl<sub>3</sub>)  $\delta$  143.86 (C<sub>Ar</sub>), 143.24 (C<sub>Ar</sub>), 140.23 (C<sub>Ar</sub>), 138.42 (C<sub>Ar</sub>), 129.14 (CH<sub>Ar</sub>), 129.10 (CH<sub>Ar</sub>), 127.30 (CH<sub>Ar</sub>), 126.45 (CH<sub>Ar</sub>), 126.23 (CH<sub>Ar</sub>), 125.92 (CH<sub>Ar</sub>), 122.84 (C<sub>Ar</sub>), 114.55 (CH<sub>Ar</sub>), 108.27 (CH<sub>Ar</sub>).

HRMS: Calcd. For C<sub>13</sub>H<sub>11</sub>N<sub>2</sub>S ([M+H]<sup>+</sup>): 227.0637, Found: 227.0636

#### **N-(pyridin-3-yl)thiazol-2-amine (6ah)<sup>2e</sup>**

According to the general procedure, the corresponding final product was obtained as a light-yellow solid.

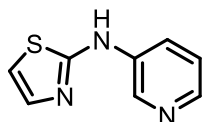

$^1\text{H NMR}$  (500 MHz,  $\text{CDCl}_3$ )  $\delta$  8.61 (d,  $J = 2.8$  Hz, 1H), 8.36-8.26 (m, 1H), 8.02 (ddd,  $J = 8.4$ , 2.9, 1.4 Hz, 1H), 7.38-7.28 (m, 2H), 6.71 (d,  $J = 3.6$  Hz, 1H).

#### **N-(4-methoxyphenyl)quinolin-3-amine (6ai)**<sup>35</sup>

According to the general procedure, the corresponding final product was obtained as a yellow solid.

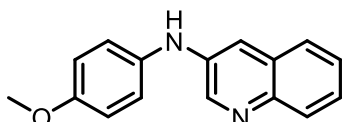

$^1\text{H NMR}$  (500 MHz,  $\text{CDCl}_3$ )  $\delta$  8.62 (d,  $J = 2.8$  Hz, 1H), 7.97 (d,  $J = 7.8$  Hz, 1H), 7.57 (d,  $J = 7.5$  Hz, 1H), 7.51-7.40 (m, 3H), 7.17 (d,  $J = 8.8$  Hz, 2H), 6.93 (d,  $J = 8.9$  Hz, 2H), 5.92 (s, 1H), 3.83 (s, 3H).

#### **N-(p-tolyl)quinolin-3-amine (6aj)**<sup>35</sup>

According to the general procedure, the corresponding final product was obtained as a yellow solid.

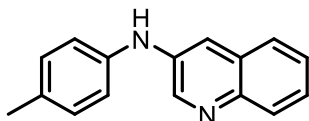

$^1\text{H NMR}$  (500 MHz,  $\text{CDCl}_3$ )  $\delta$  8.66 (d,  $J = 2.9$  Hz, 1H), 7.99 (d,  $J = 8.1$  Hz, 1H), 7.65-7.58 (m, 2H), 7.51-7.42 (m, 2H), 7.17 (d,  $J = 8.0$  Hz, 2H), 7.11 (d,  $J = 8.2$  Hz, 2H), 6.03 (s, 1H), 2.35 (s, 3H).

#### **N-(4-fluorophenyl)pyridin-3-amine (6ak)**<sup>11</sup>

According to the general procedure, the corresponding final product was obtained as a yellow solid.

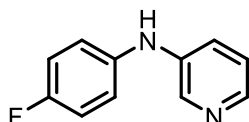

$^1\text{H NMR}$  (400 MHz,  $\text{CDCl}_3$ )  $\delta$  8.30 (d,  $J = 2.9$  Hz, 1H), 8.12 (dd,  $J = 4.8$ , 1.4 Hz, 1H), 7.29 (ddd,  $J = 8.3$ , 2.8, 1.4 Hz, 1H), 7.14 (dd,  $J = 8.3$ , 4.7 Hz, 1H), 7.06 (dt,  $J = 7.1$ , 2.6 Hz, 2H), 7.03-6.96 (m, 2H), 5.91 (s, 1H).

#### **N-(4-fluorophenyl)quinolin-3-amine (6al)**<sup>36</sup>

According to the general procedure, the corresponding final product was obtained as a light-brown solid.

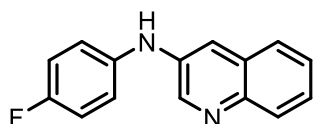

$^1\text{H}$  NMR (500 MHz,  $\text{CDCl}_3$ )  $\delta$  8.65 (d,  $J = 2.8$  Hz, 1H), 7.99 (d,  $J = 8.2$  Hz, 1H), 7.64-7.55 (m, 2H), 7.48 (dddd,  $J = 21.0, 8.2, 6.9, 1.5$  Hz, 2H), 7.16 (dd,  $J = 8.9, 4.6$  Hz, 2H), 7.06 (t,  $J = 8.6$  Hz, 2H), 6.04 (s, 1H).

**N-([1,1'-biphenyl]-4-yl)pyridin-3-amine (6am)**

According to the general procedure, the corresponding final product was obtained as a light-yellow solid.

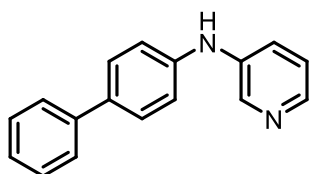

$^1\text{H}$  NMR (400 MHz,  $\text{CDCl}_3$ )  $\delta$  8.44 (d,  $J = 2.8$  Hz, 1H,  $\text{CH}_{\text{Ar}}$ ), 8.18 (dd,  $J = 4.7, 1.4$  Hz, 1H,  $\text{CH}_{\text{Ar}}$ ), 7.60-7.52 (m, 4H,  $\text{CH}_{\text{Ar}}$ ), 7.49 (dd,  $J = 2.8, 1.4$  Hz, 1H,  $\text{CH}_{\text{Ar}}$ ), 7.43 (t,  $J = 7.6$  Hz, 2H,  $\text{CH}_{\text{Ar}}$ ), 7.32 (t,  $J = 7.3$  Hz, 1H,  $\text{CH}_{\text{Ar}}$ ), 7.21 (ddd,  $J = 8.4, 4.7, 0.7$  Hz, 1H,  $\text{CH}_{\text{Ar}}$ ), 7.16 (d,  $J = 8.6$  Hz, 2H,  $\text{CH}_{\text{Ar}}$ ), 5.91 (s, 1H, NH).

$^{13}\text{C}$  NMR (126 MHz,  $\text{CDCl}_3$ )  $\delta$  142.37 ( $\text{CH}_{\text{Ar}}$ ), 141.53 ( $\text{C}_{\text{Ar}}$ ), 140.80 ( $\text{C}_{\text{Ar}}$ ), 140.57 ( $\text{C}_{\text{Ar}}$ ), 139.79 ( $\text{CH}_{\text{Ar}}$ ), 135.12 ( $\text{C}_{\text{Ar}}$ ), 129.00 ( $\text{CH}_{\text{Ar}}$ ), 128.40 ( $\text{CH}_{\text{Ar}}$ ), 127.06 ( $\text{CH}_{\text{Ar}}$ ), 126.83 ( $\text{CH}_{\text{Ar}}$ ), 123.97 ( $\text{CH}_{\text{Ar}}$ ), 123.95 ( $\text{CH}_{\text{Ar}}$ ), 118.58 ( $\text{CH}_{\text{Ar}}$ ).

HRMS: Calcd. For  $\text{C}_{17}\text{H}_{14}\text{N}_2\text{Na}$  ( $[\text{M}+\text{H}]^+$ ): 269.1049, Found: 269.1057

**N-([1,1'-biphenyl]-4-yl)quinolin-3-amine (6an)**

According to the general procedure, the corresponding final product was obtained as a light-yellow solid.

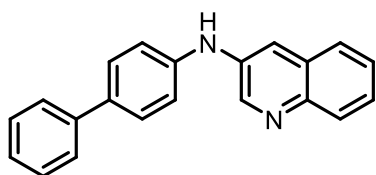

$^1\text{H}$  NMR (500 MHz,  $\text{CDCl}_3$ )  $\delta$  8.75 (d,  $J = 2.8$  Hz, 1H,  $\text{CH}_{\text{Ar}}$ ), 8.04 (d,  $J = 8.2$  Hz, 1H,  $\text{CH}_{\text{Ar}}$ ), 7.80 (s, 1H,  $\text{CH}_{\text{Ar}}$ ), 7.68 (d,  $J = 8.0$  Hz, 1H,  $\text{CH}_{\text{Ar}}$ ), 7.65-7.57 (m, 4H,  $\text{CH}_{\text{Ar}}$ ), 7.57-7.53 (m, 1H,  $\text{CH}_{\text{Ar}}$ ), 7.50 (d,  $J = 7.6$  Hz, 1H,  $\text{CH}_{\text{Ar}}$ ), 7.46 (t,  $J = 7.6$  Hz, 2H,  $\text{CH}_{\text{Ar}}$ ), 7.34 (t,  $J = 7.4$  Hz, 1H,  $\text{CH}_{\text{Ar}}$ ), 7.27 (d,  $J = 3.5$  Hz, 2H,  $\text{CH}_{\text{Ar}}$ ), 6.08 (s, 1H, NH).

$^{13}\text{C}$  NMR (126 MHz,  $\text{CDCl}_3$ )  $\delta$  145.24 ( $\text{C}_{\text{Ar}}$ ), 143.87 ( $\text{C}_{\text{Ar}}$ ), 141.35 ( $\text{C}_{\text{Ar}}$ ), 140.71 ( $\text{C}_{\text{Ar}}$ ), 136.94 ( $\text{C}_{\text{Ar}}$ ), 135.34 ( $\text{C}_{\text{Ar}}$ ), 129.22 ( $\text{CH}_{\text{Ar}}$ ), 128.96 ( $\text{CH}_{\text{Ar}}$ ), 128.41 ( $\text{CH}_{\text{Ar}}$ ), 127.36 ( $\text{CH}_{\text{Ar}}$ ), 127.06 ( $\text{CH}_{\text{Ar}}$ ), 126.81 ( $\text{CH}_{\text{Ar}}$ ), 126.79 ( $\text{CH}_{\text{Ar}}$ ), 126.64 ( $\text{CH}_{\text{Ar}}$ ), 118.79 ( $\text{CH}_{\text{Ar}}$ ), 117.54 ( $\text{CH}_{\text{Ar}}$ ).

HRMS: Calcd. For  $\text{C}_{21}\text{H}_{17}\text{N}_2$  ( $[\text{M}+\text{H}]^+$ ): 297.1386, Found: 297.1384

**N-(2,6-dimethylphenyl)pyridin-3-amine (6ao)<sup>9</sup>**

According to the general procedure, the corresponding final product was obtained as a yellow solid.

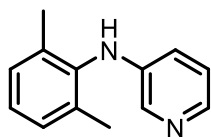

$^1\text{H NMR}$  (400 MHz,  $\text{CDCl}_3$ )  $\delta$  7.96 (d,  $J = 2.9$  Hz, 1H), 7.92 (dd,  $J = 4.7, 1.4$  Hz, 1H), 7.09-7.01 (m, 3H), 6.96 (dd,  $J = 8.3, 4.7$  Hz, 1H), 6.57 (ddd,  $J = 8.3, 2.9, 1.4$  Hz, 1H), 5.23 (s, 1H), 2.13 (s, 6H).

#### **N-(2,6-dimethylphenyl)quinolin-3-amine (6ap)**

According to the general procedure, the corresponding final product was obtained as a gray solid.

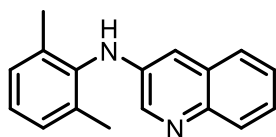

$^1\text{H NMR}$  (500 MHz,  $\text{CDCl}_3$ )  $\delta$  8.63 (d,  $J = 2.8$  Hz, 1H,  $\text{CH}_{\text{Ar}}$ ), 7.98 (d,  $J = 8.1$  Hz, 1H,  $\text{CH}_{\text{Ar}}$ ), 7.49 (dd,  $J = 7.9, 1.7$  Hz, 1H,  $\text{CH}_{\text{Ar}}$ ), 7.40 (dddd,  $J = 18.9, 8.1, 6.9, 1.6$  Hz, 2H,  $\text{CH}_{\text{Ar}}$ ), 7.19 (d,  $J = 2.1$  Hz, 3H,  $\text{CH}_{\text{Ar}}$ ), 6.70 (d,  $J = 2.8$  Hz, 1H,  $\text{CH}_{\text{Ar}}$ ), 5.60 (s, 1H, NH), 2.25 (s, 6H,  $\text{CH}_3$ ).

$^{13}\text{C NMR}$  (126 MHz,  $\text{CDCl}_3$ )  $\delta$  143.10 ( $\text{C}_{\text{Ar}}$ ), 142.73 ( $\text{C}_{\text{Ar}}$ ), 139.87 ( $\text{C}_{\text{Ar}}$ ), 136.93 ( $\text{C}_{\text{Ar}}$ ), 136.08 ( $\text{C}_{\text{Ar}}$ ), 129.45 ( $\text{C}_{\text{Ar}}$ ), 129.11 ( $\text{CH}_{\text{Ar}}$ ), 128.96 ( $\text{CH}_{\text{Ar}}$ ), 127.05 ( $\text{CH}_{\text{Ar}}$ ), 126.68 ( $\text{CH}_{\text{Ar}}$ ), 126.14 ( $\text{CH}_{\text{Ar}}$ ), 125.42 ( $\text{CH}_{\text{Ar}}$ ), 111.94 ( $\text{CH}_{\text{Ar}}$ ), 18.40 ( $\text{CH}_3$ ).

HRMS: Calcd. For  $\text{C}_{17}\text{H}_{17}\text{N}_2$  ( $[\text{M}+\text{H}]^+$ ): 249.1386, Found: 249.1385

#### **N-(naphthalen-1-yl)pyridin-3-amine (6aq)<sup>8</sup>**

According to the general procedure, the corresponding final product was obtained as a light-brown solid.

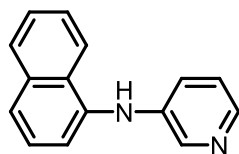

$^1\text{H NMR}$  (400 MHz,  $\text{CDCl}_3$ )  $\delta$  8.36 (dd,  $J = 2.8, 0.8$  Hz, 1H), 8.14 (dd,  $J = 4.6, 1.5$  Hz, 1H), 8.00 (d,  $J = 9.2$  Hz, 1H), 7.88 (d,  $J = 7.9$  Hz, 1H), 7.64 (d,  $J = 8.1$  Hz, 1H), 7.54-7.46 (m, 2H), 7.42 (t,  $J = 7.8$  Hz, 1H), 7.35 (dd,  $J = 7.4, 1.2$  Hz, 1H), 7.20 (ddd,  $J = 8.3, 2.8, 1.4$  Hz, 1H), 7.12 (ddd,  $J = 8.3, 4.6, 0.8$  Hz, 1H), 6.11 (s, 1H).

#### **N-(naphthalen-1-yl)quinolin-3-amine (6ar)**

According to the general procedure, the corresponding final product was obtained as a brown solid.

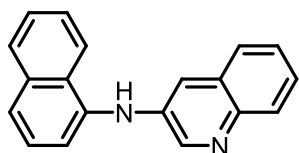

$^1\text{H}$  NMR (500 MHz,  $\text{CDCl}_3$ )  $\delta$  8.79 (d,  $J = 2.8$  Hz, 1H,  $\text{CH}_{\text{Ar}}$ ), 8.03 (d,  $J = 7.1$  Hz, 2H,  $\text{CH}_{\text{Ar}}$ ), 7.96-7.88 (m, 1H,  $\text{CH}_{\text{Ar}}$ ), 7.69 (dd,  $J = 7.8, 1.7$  Hz, 1H,  $\text{CH}_{\text{Ar}}$ ), 7.58-7.40 (m, 7H,  $\text{CH}_{\text{Ar}}$ ), 7.37 (d,  $J = 2.7$  Hz, 1H,  $\text{CH}_{\text{Ar}}$ ), 6.28 (s, 1H, NH).

$^{13}\text{C}$  NMR (126 MHz,  $\text{CDCl}_3$ )  $\delta$  144.58 ( $\text{C}_{\text{Ar}}$ ), 143.44 ( $\text{C}_{\text{Ar}}$ ), 138.97 ( $\text{C}_{\text{Ar}}$ ), 137.47 ( $\text{C}_{\text{Ar}}$ ), 134.82 ( $\text{C}_{\text{Ar}}$ ), 129.07 ( $\text{C}_{\text{Ar}}$ ), 129.01 ( $\text{CH}_{\text{Ar}}$ ), 128.72 ( $\text{CH}_{\text{Ar}}$ ), 128.19 ( $\text{CH}_{\text{Ar}}$ ), 127.10 ( $\text{CH}_{\text{Ar}}$ ), 126.46 ( $\text{CH}_{\text{Ar}}$ ), 126.40 ( $\text{CH}_{\text{Ar}}$ ), 126.30 ( $\text{CH}_{\text{Ar}}$ ), 126.20 ( $\text{CH}_{\text{Ar}}$ ), 126.04 ( $\text{CH}_{\text{Ar}}$ ), 124.58, 121.97 ( $\text{CH}_{\text{Ar}}$ ), 117.64 ( $\text{CH}_{\text{Ar}}$ ), 116.62 ( $\text{CH}_{\text{Ar}}$ ).

HRMS: Calcd. For  $\text{C}_{19}\text{H}_{15}\text{N}_2$  ( $[\text{M}+\text{H}]^+$ ): 271.1230, Found: 271.1124

#### **N-(naphthalen-2-yl)pyridin-3-amine (6as)**<sup>37</sup>

According to the general procedure, the corresponding final product was obtained as a brown solid.

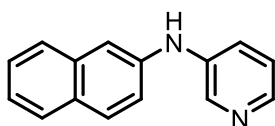

$^1\text{H}$  NMR (400 MHz,  $\text{CDCl}_3$ )  $\delta$  8.48 (d,  $J = 2.8$  Hz, 1H), 8.21 (dd,  $J = 4.7, 1.4$  Hz, 1H), 7.82-7.74 (m, 2H), 7.67 (d,  $J = 8.2$  Hz, 1H), 7.51 (ddd,  $J = 8.3, 2.8, 1.4$  Hz, 1H), 7.48-7.41 (m, 2H), 7.35 (t,  $J = 6.9$  Hz, 1H), 7.25-7.20 (m, 2H), 5.99 (s, 1H).

#### **N-(naphthalen-2-yl)quinolin-3-amine (6at)**<sup>35</sup>

According to the general procedure, the corresponding final product was obtained as a light-brown solid.

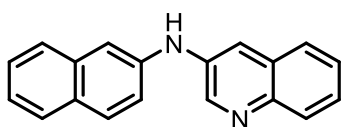

$^1\text{H}$  NMR (500 MHz,  $\text{CDCl}_3$ )  $\delta$  8.78 (d,  $J = 2.7$  Hz, 1H), 8.05 (d,  $J = 8.3$  Hz, 1H), 7.81 (t,  $J = 10.3$  Hz, 3H), 7.70 (d,  $J = 8.2$  Hz, 1H), 7.66 (d,  $J = 6.6$  Hz, 1H), 7.58-7.52 (m, 2H), 7.51-7.43 (m, 2H), 7.37 (t,  $J = 7.2$  Hz, 1H), 7.31 (dd,  $J = 8.8, 2.4$  Hz, 1H), 6.28 (s, 1H).

# $^1\text{H}$ NMR and $^{13}\text{C}$ NMR spectra

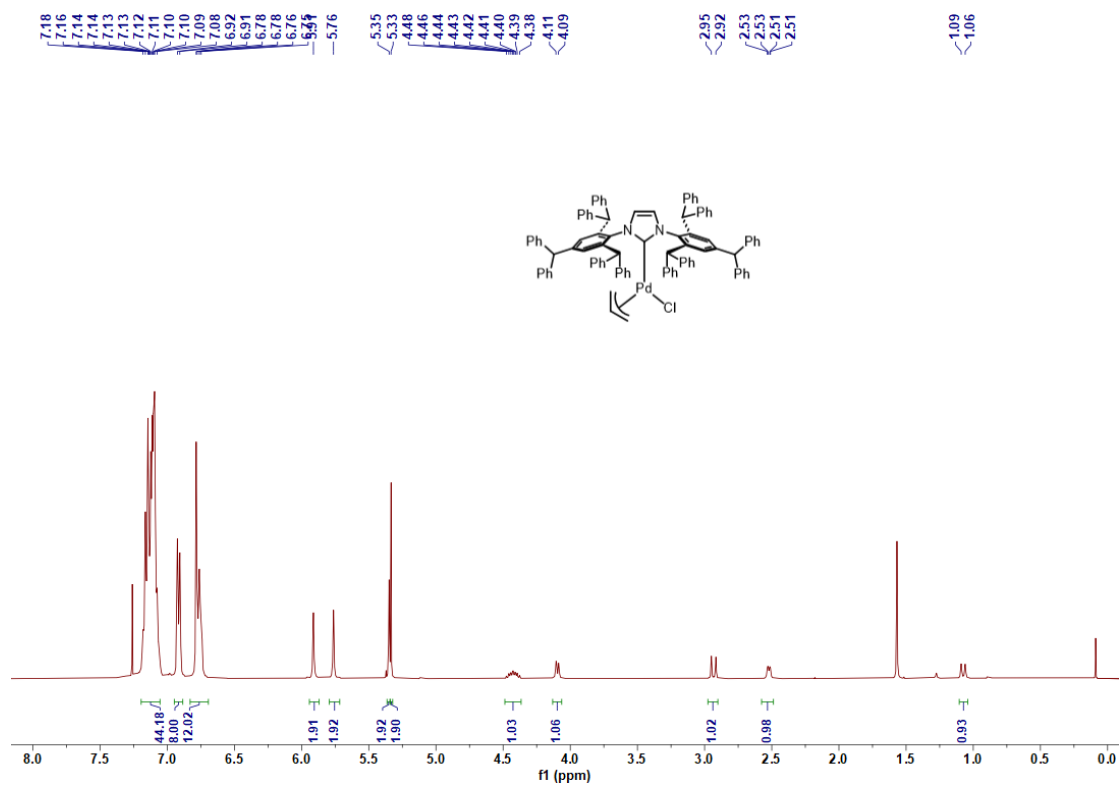

$^1\text{H}$  NMR spectrum of Pd(IPr<sup>#</sup>)Cl(allyl)

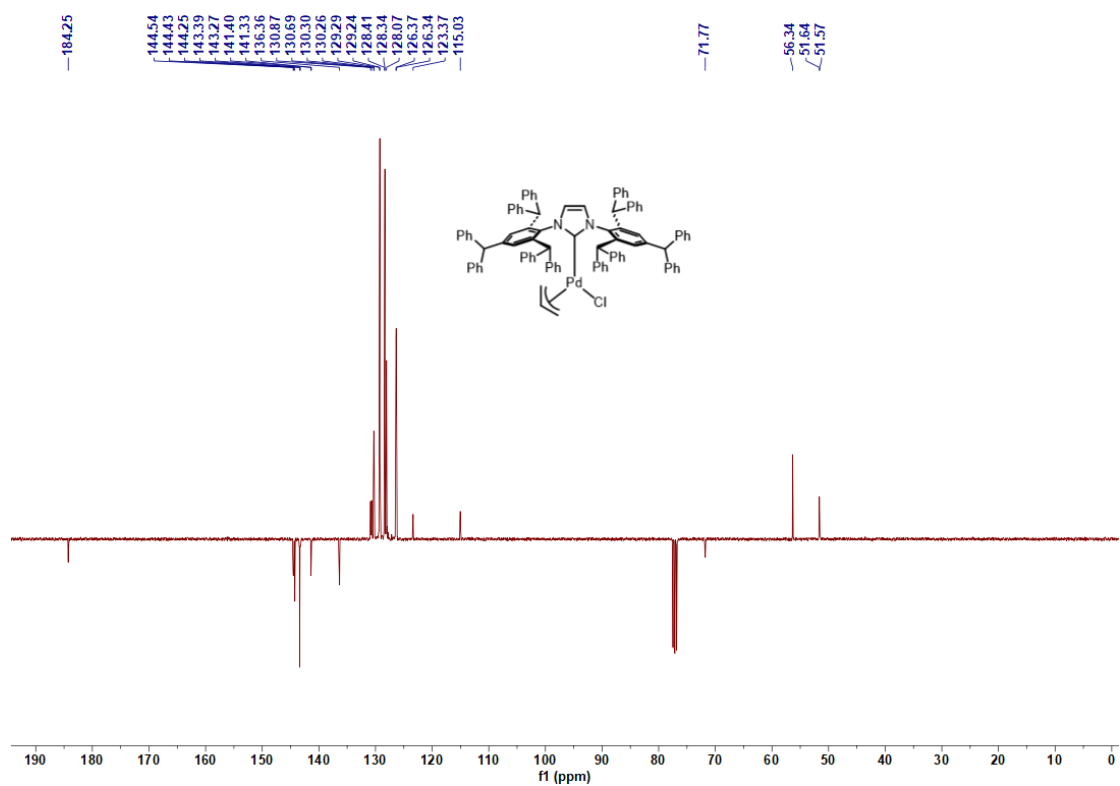

$^{13}\text{C}$  NMR spectrum of Pd(IPr<sup>#</sup>)Cl(allyl)

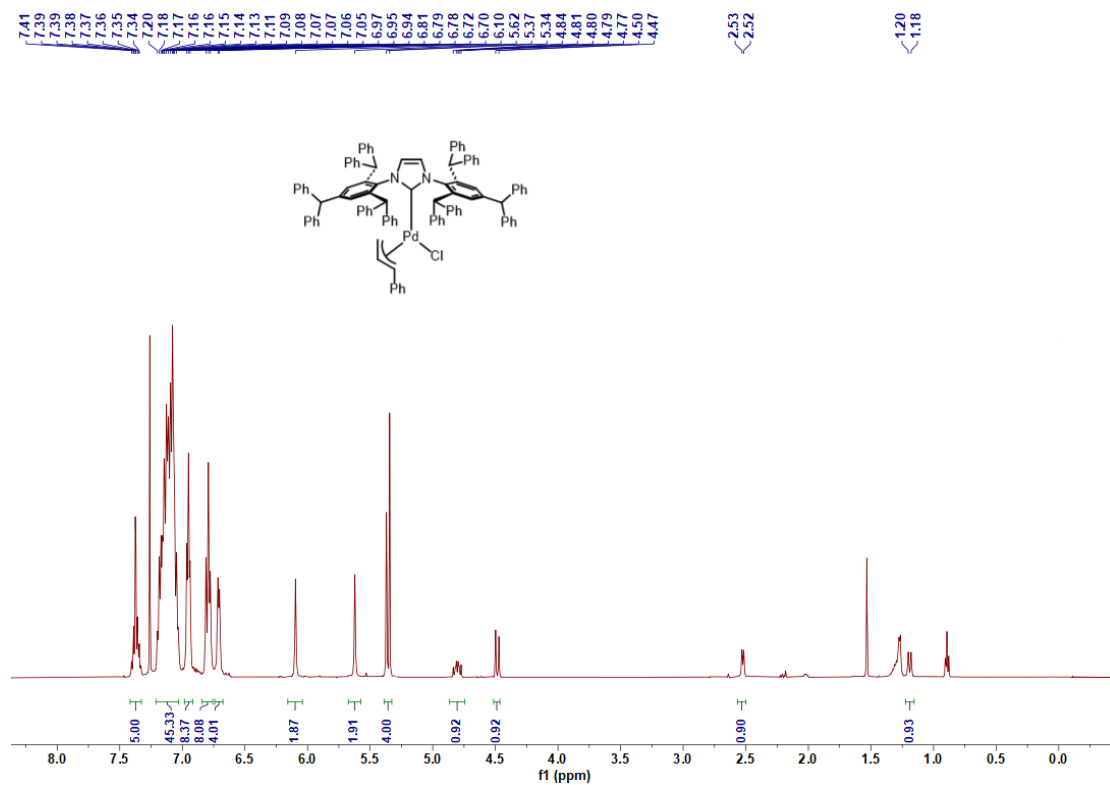

<sup>1</sup>H NMR spectrum of Pd(IPr<sup>#</sup>)Cl(cin)

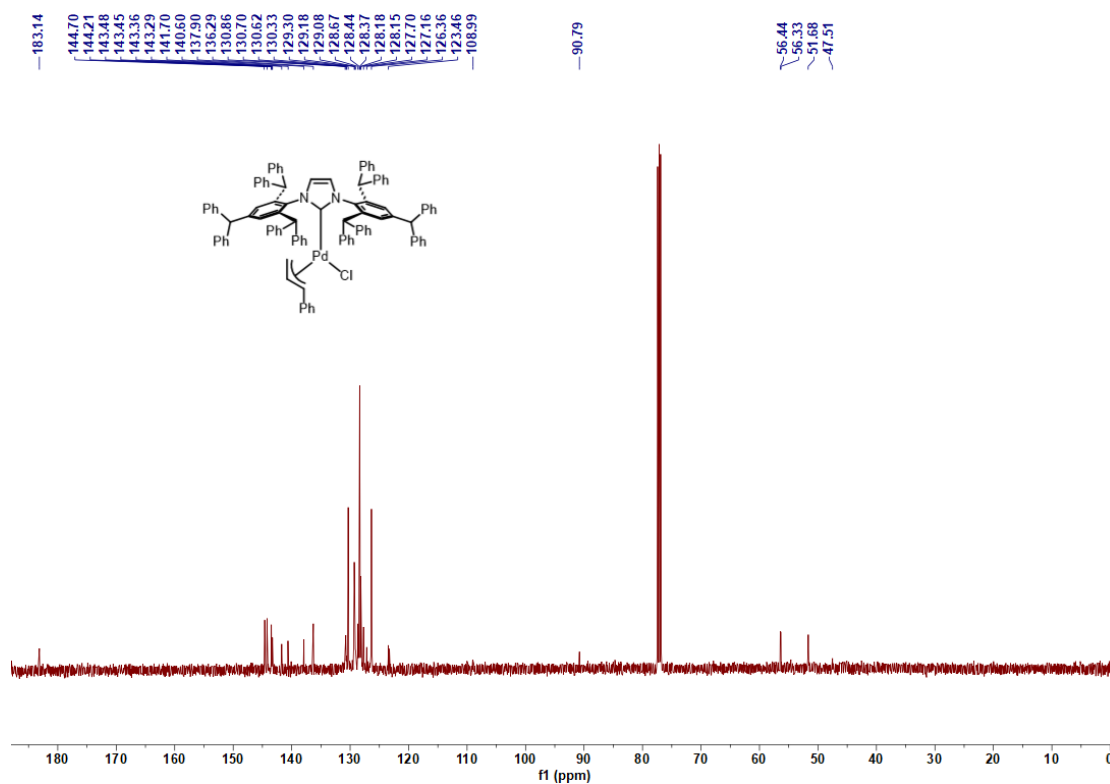

<sup>13</sup>C NMR spectrum of Pd(IPr<sup>#</sup>)Cl(cin)

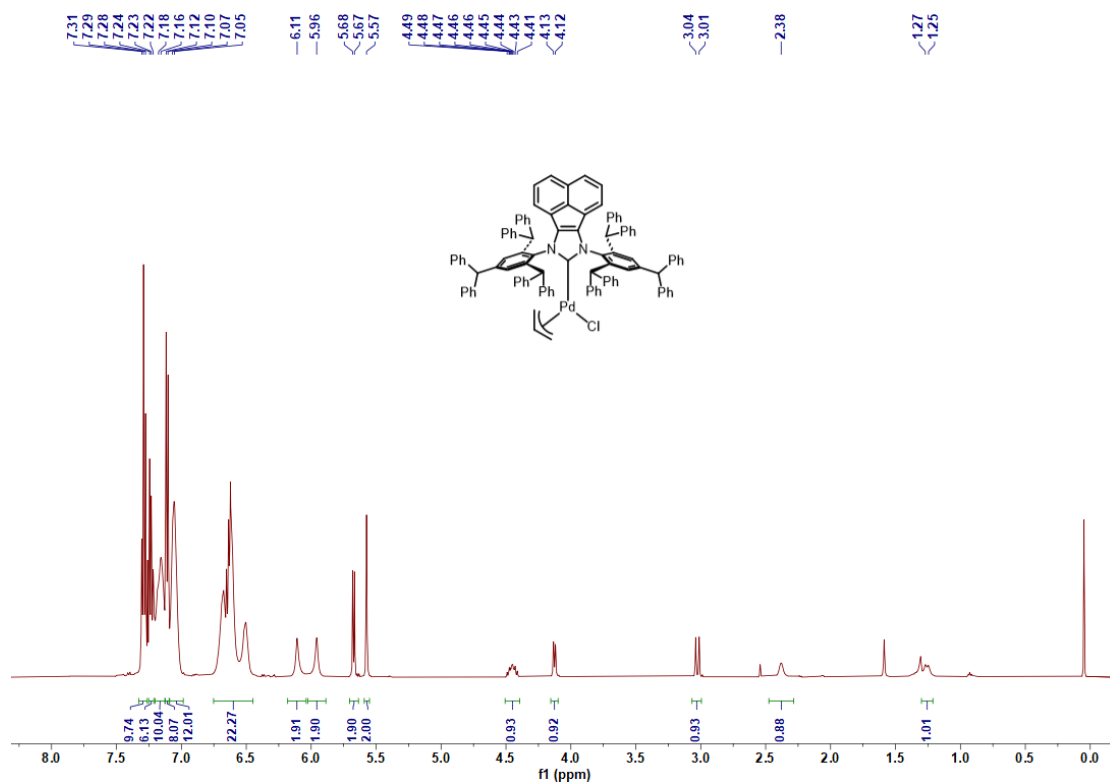

<sup>1</sup>H NMR spectrum of Pd(BIAN-IPr<sup>#</sup>)Cl(allyl)

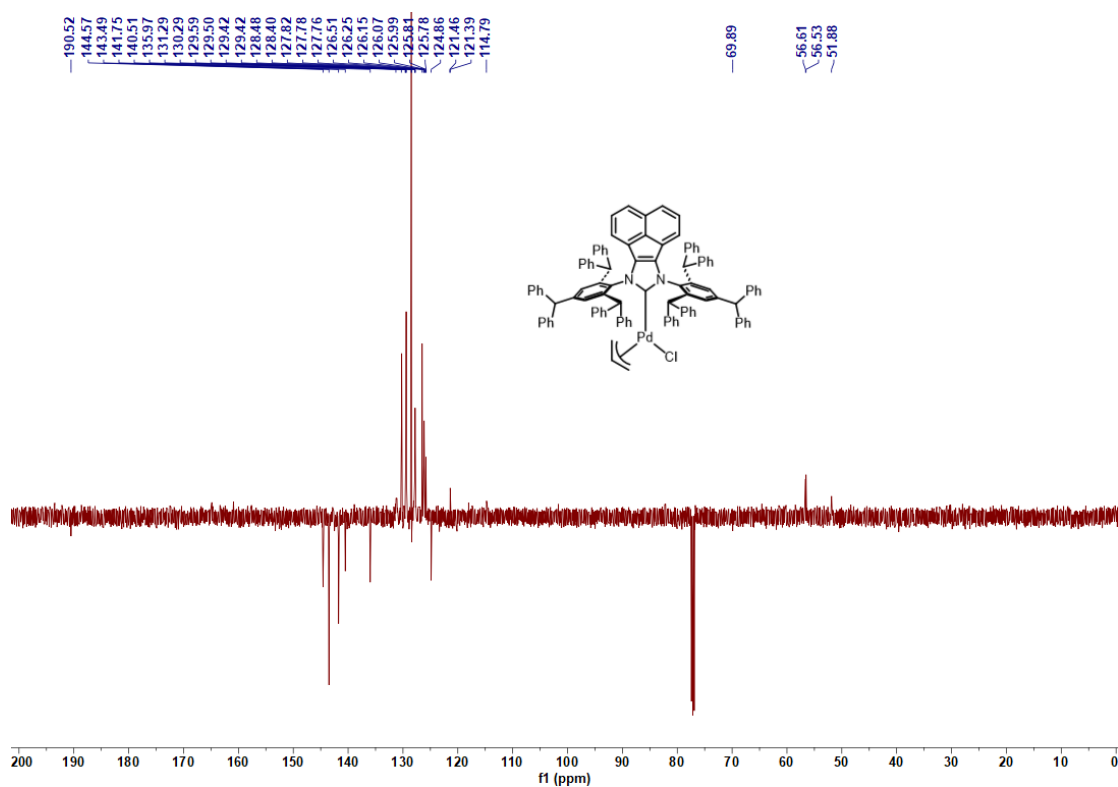

<sup>13</sup>C NMR spectrum of Pd(BIAN-IPr<sup>#</sup>)Cl(allyl)

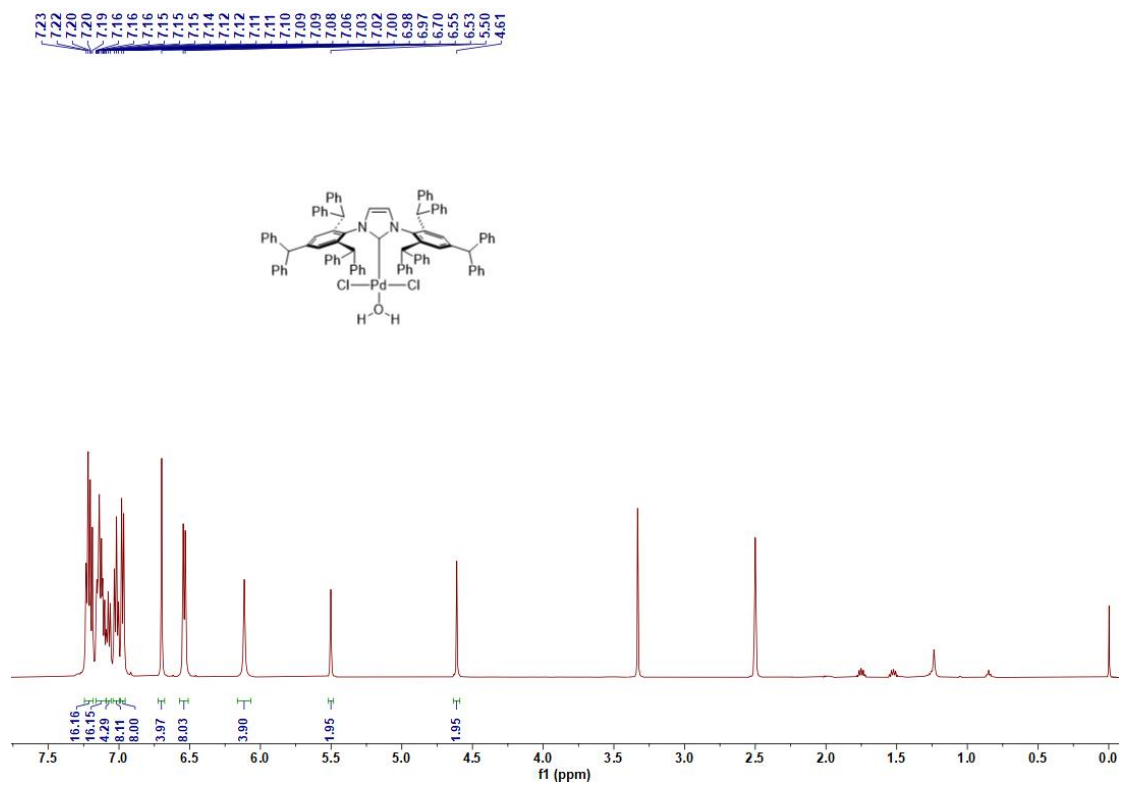

$^1\text{H}$  NMR spectrum of  $\text{Pd}(\text{IPr}^\#)\text{Cl}_2(\text{OH}_2)$

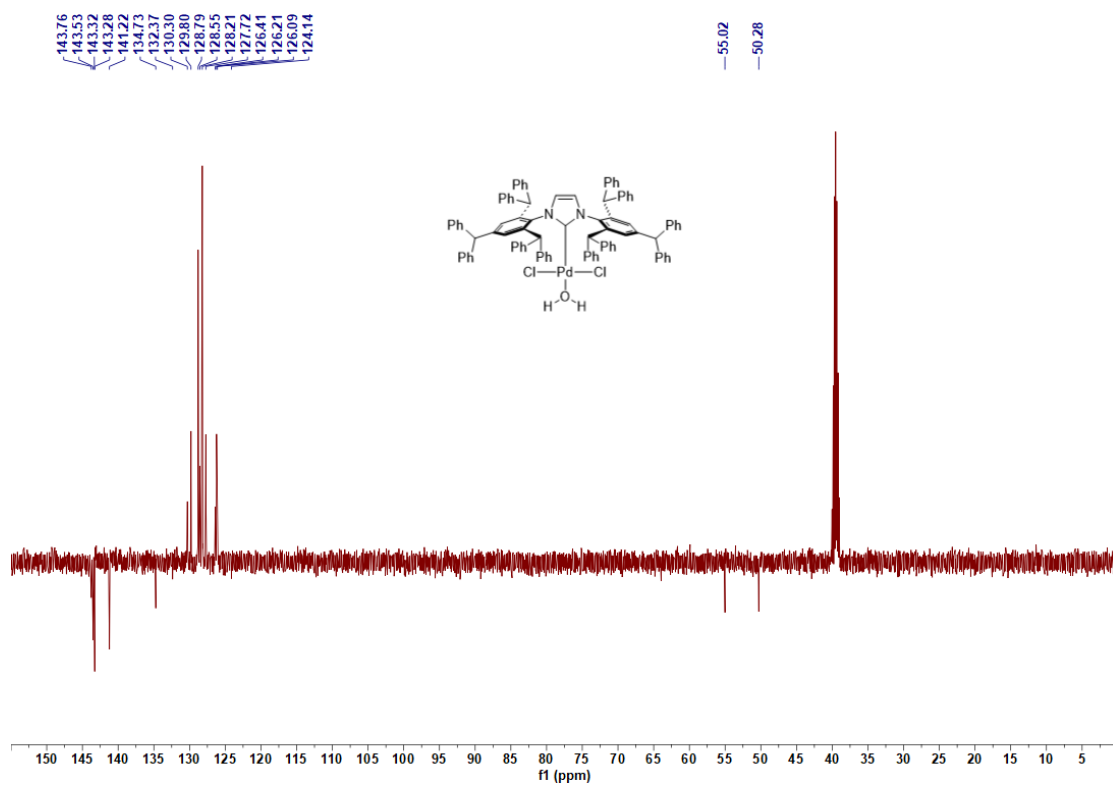

$^{13}\text{C}$  NMR spectrum of  $\text{Pd}(\text{IPr}^\#)\text{Cl}_2(\text{OH}_2)$

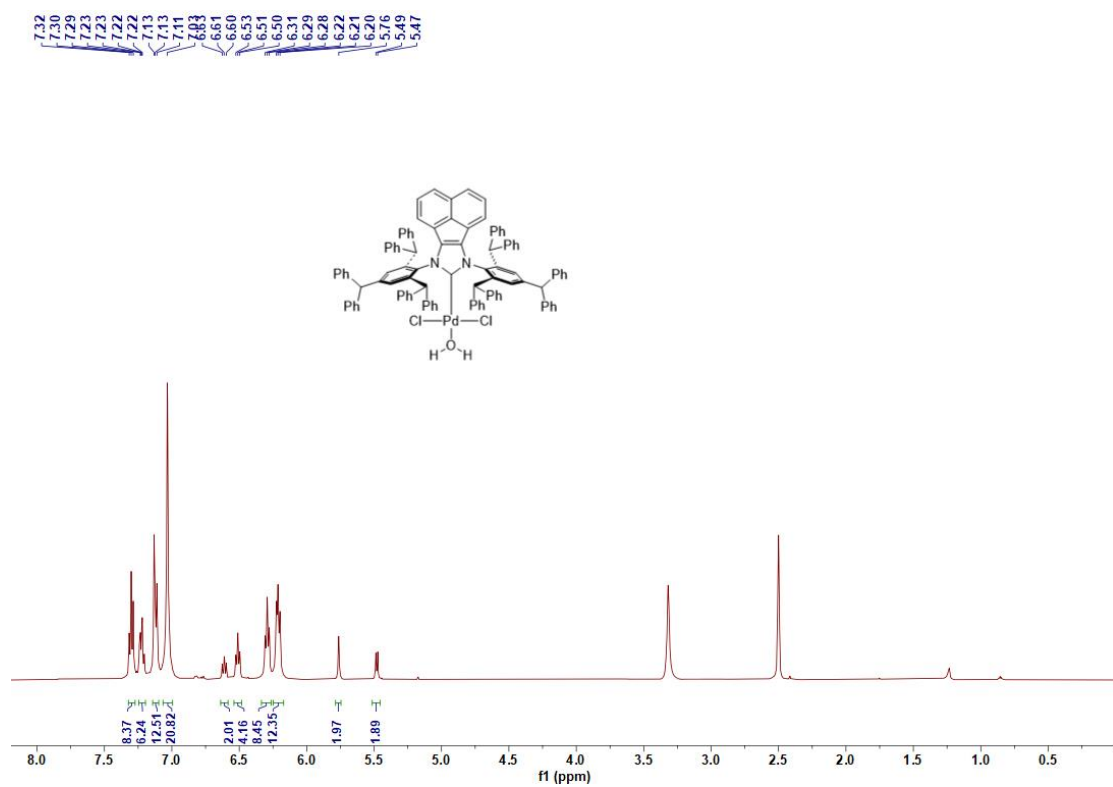

**<sup>1</sup>H NMR spectrum of Pd(BIAN-IPr)<sup>#</sup>Cl<sub>2</sub>(OH<sub>2</sub>)**

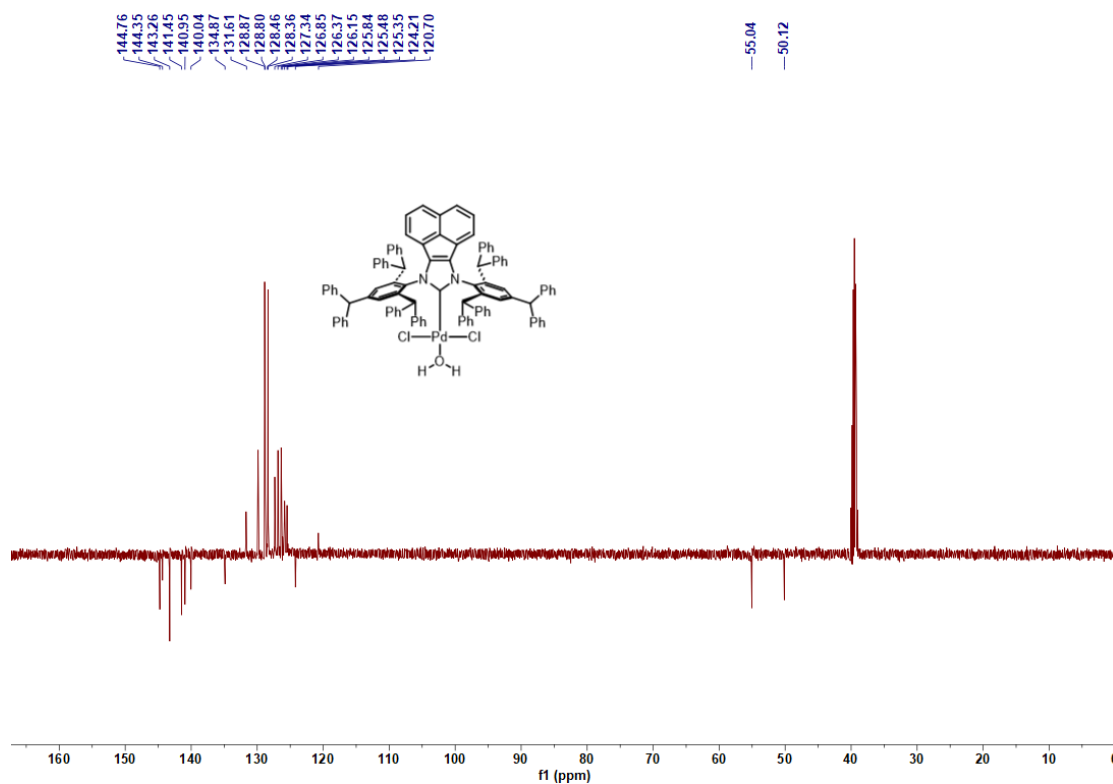

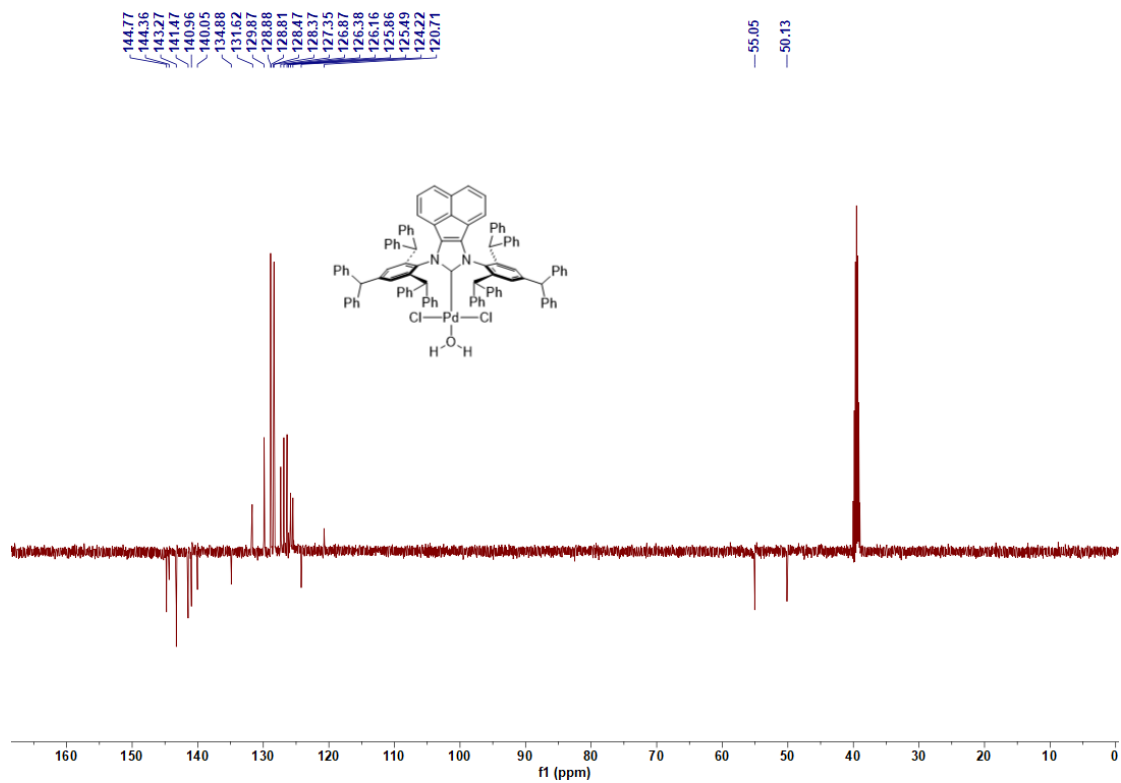

<sup>13</sup>C NMR spectrum of Pd(BIAN-IPr)<sup>#</sup>Cl<sub>2</sub>(OH<sub>2</sub>)

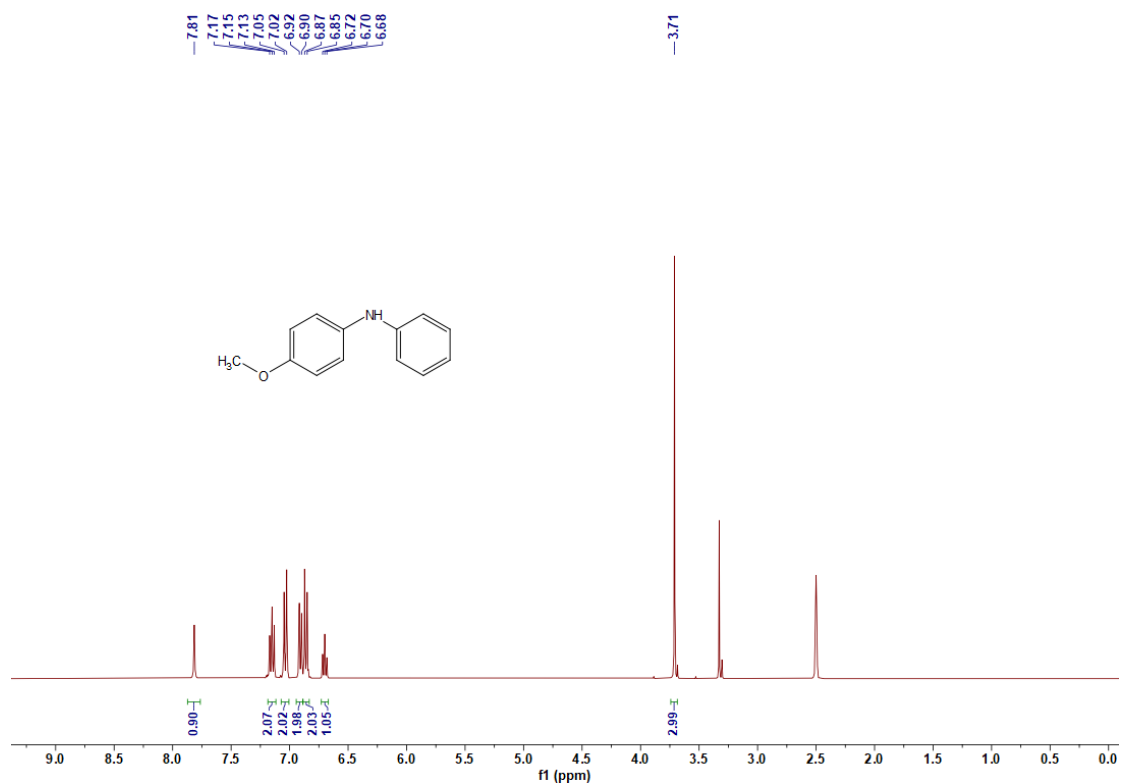

<sup>1</sup>H NMR spectrum of 2a

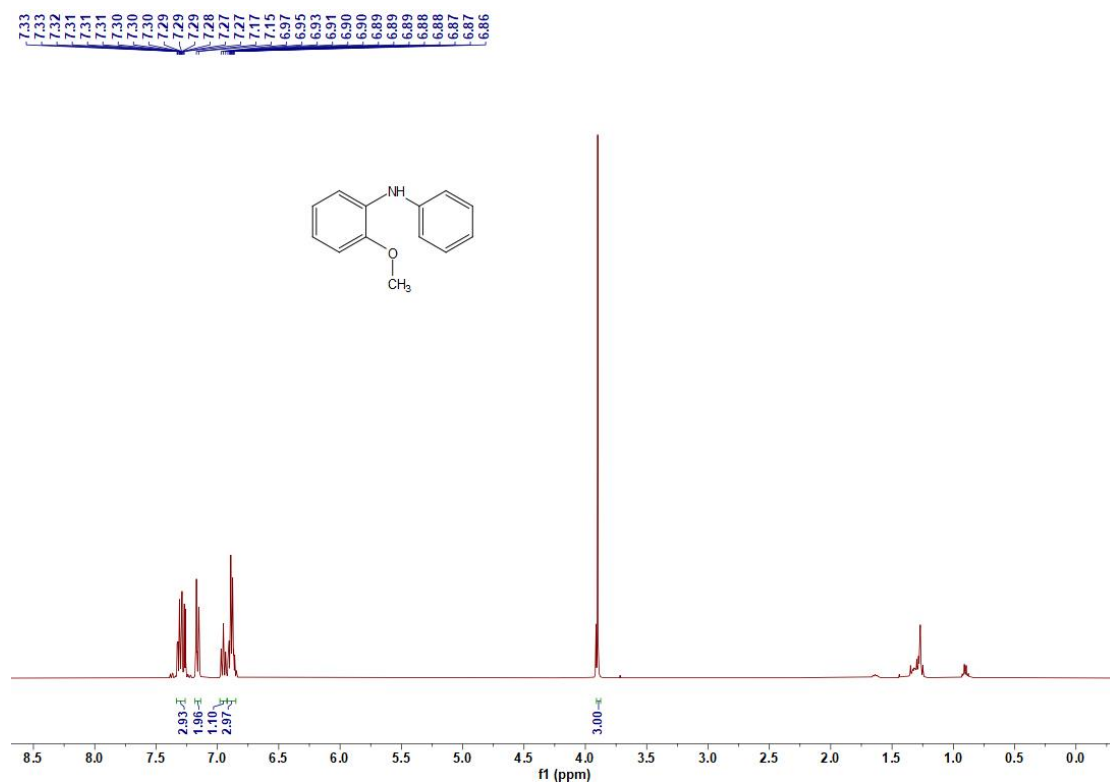

<sup>1</sup>H NMR spectrum of 2b

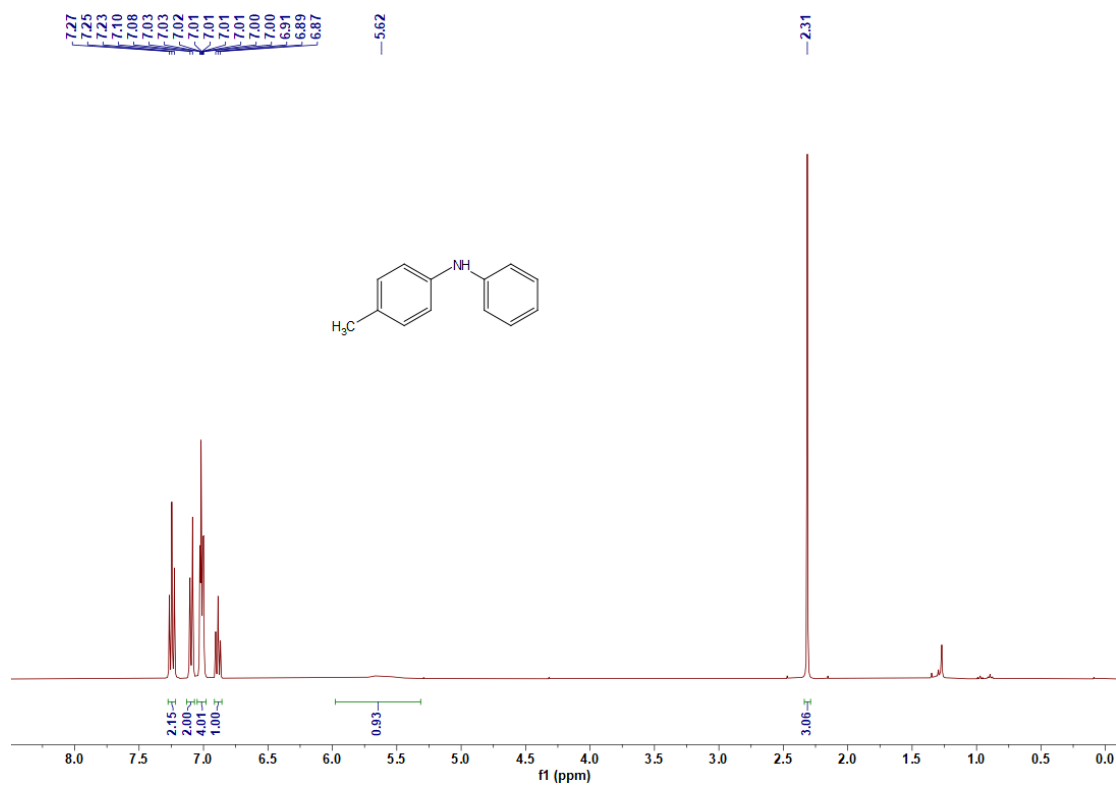

<sup>1</sup>H NMR spectrum of 2c

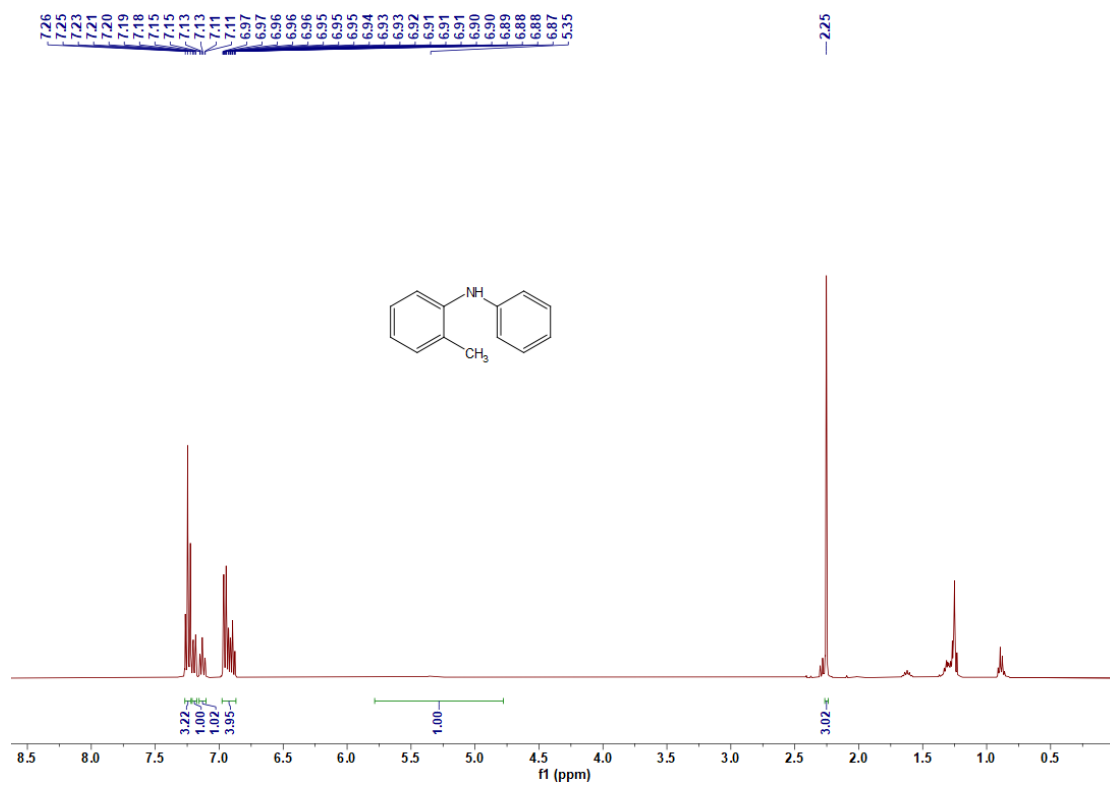

<sup>1</sup>H NMR spectrum of 2d

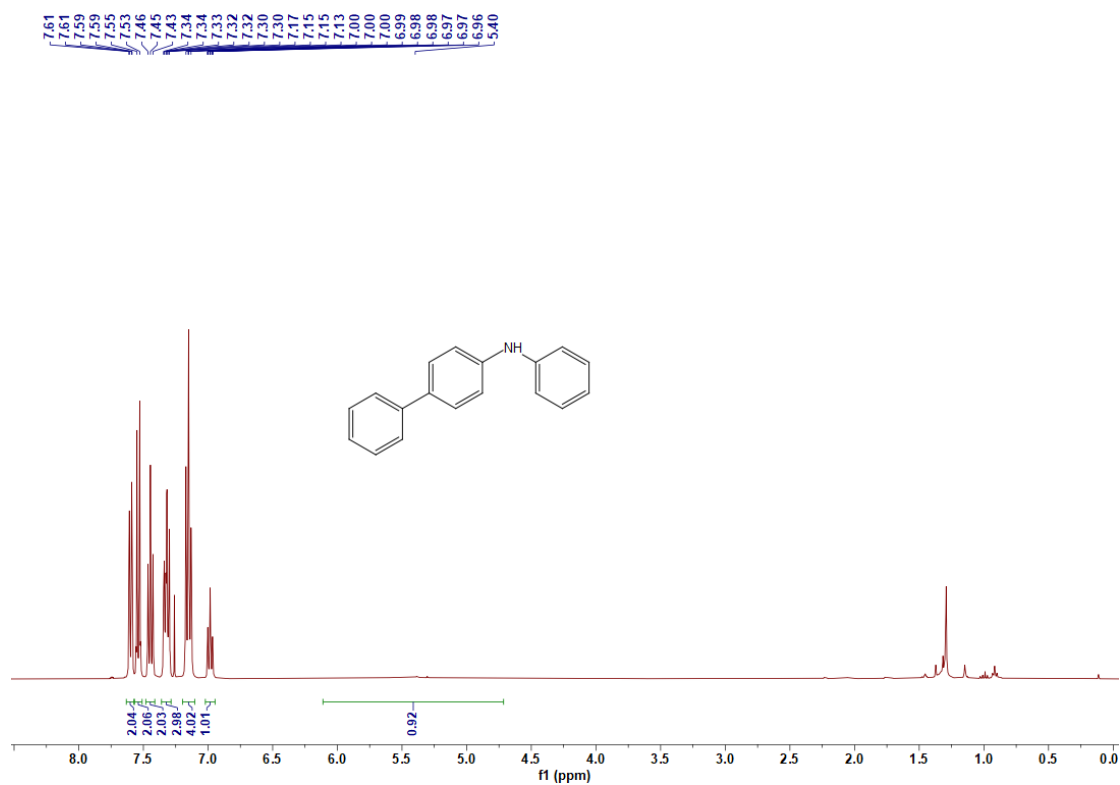

<sup>1</sup>H NMR spectrum of 2e

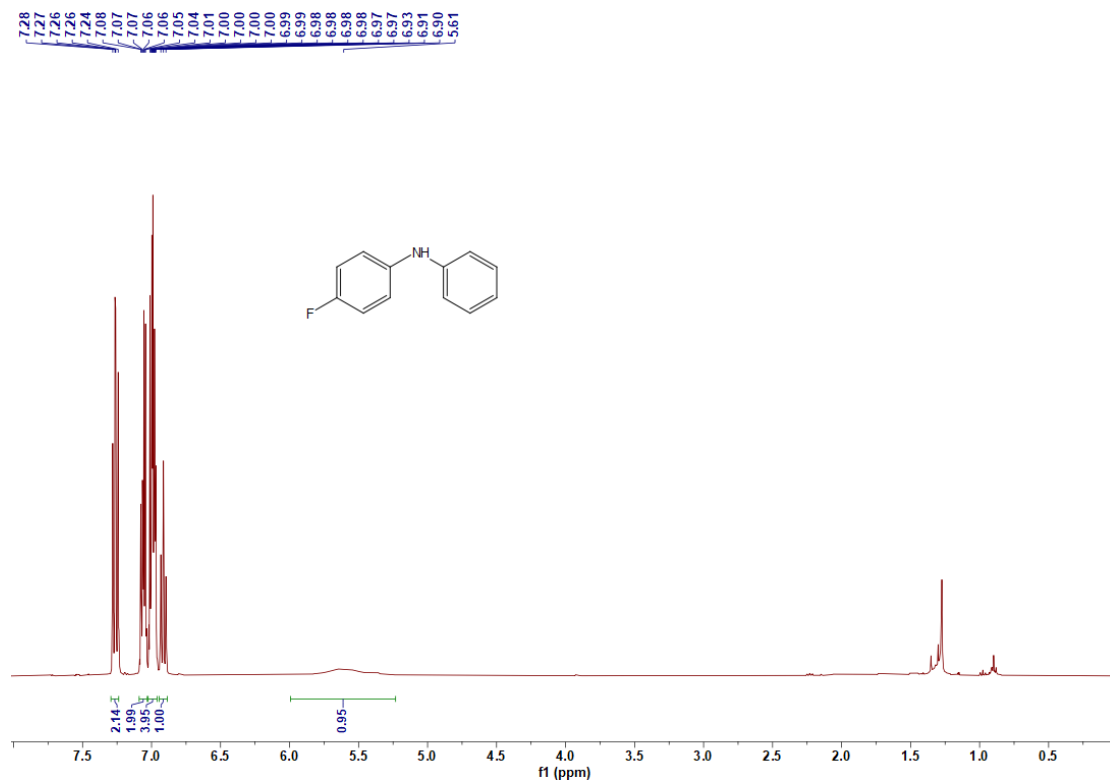

<sup>1</sup>H NMR spectrum of 2f

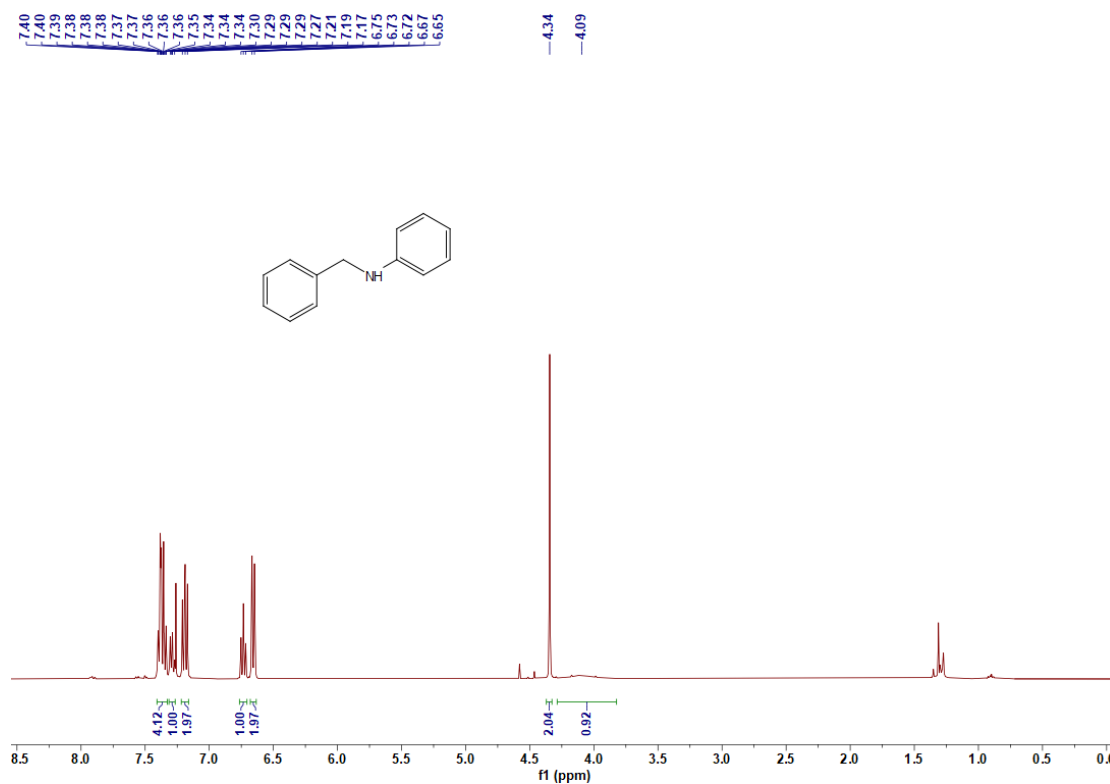

<sup>1</sup>H NMR spectrum of 2g

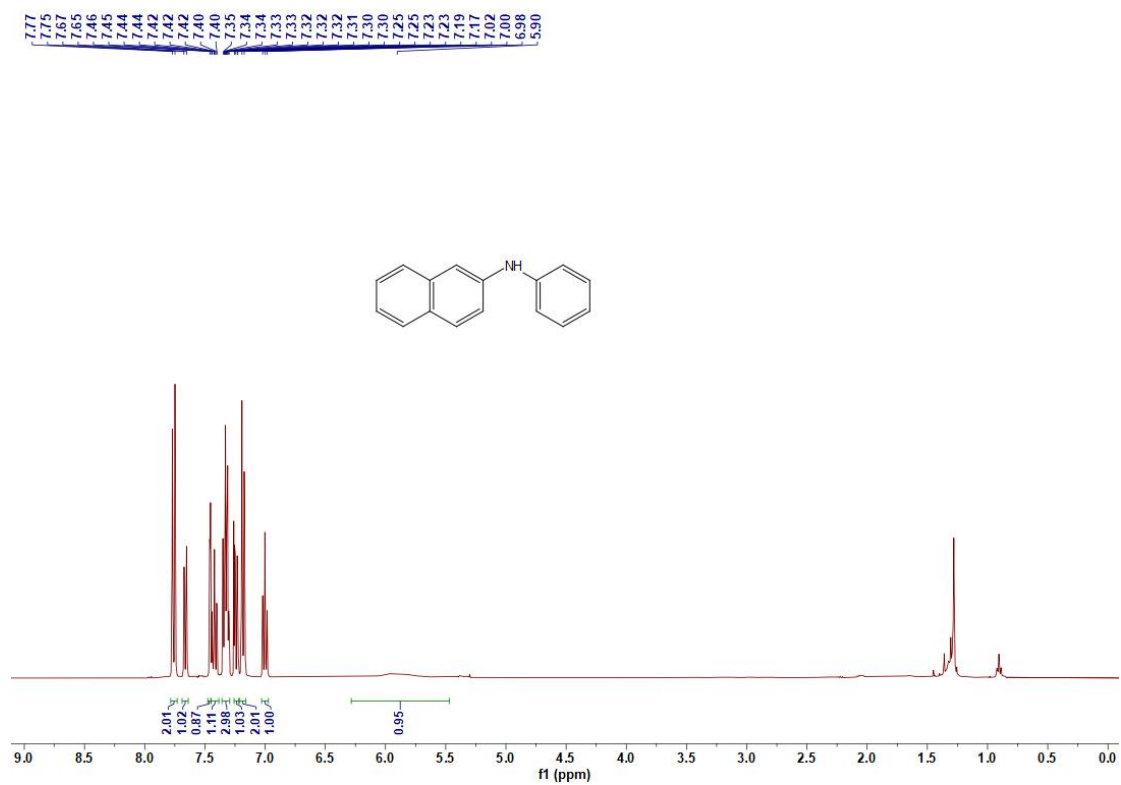

<sup>1</sup>H NMR spectrum of 2h

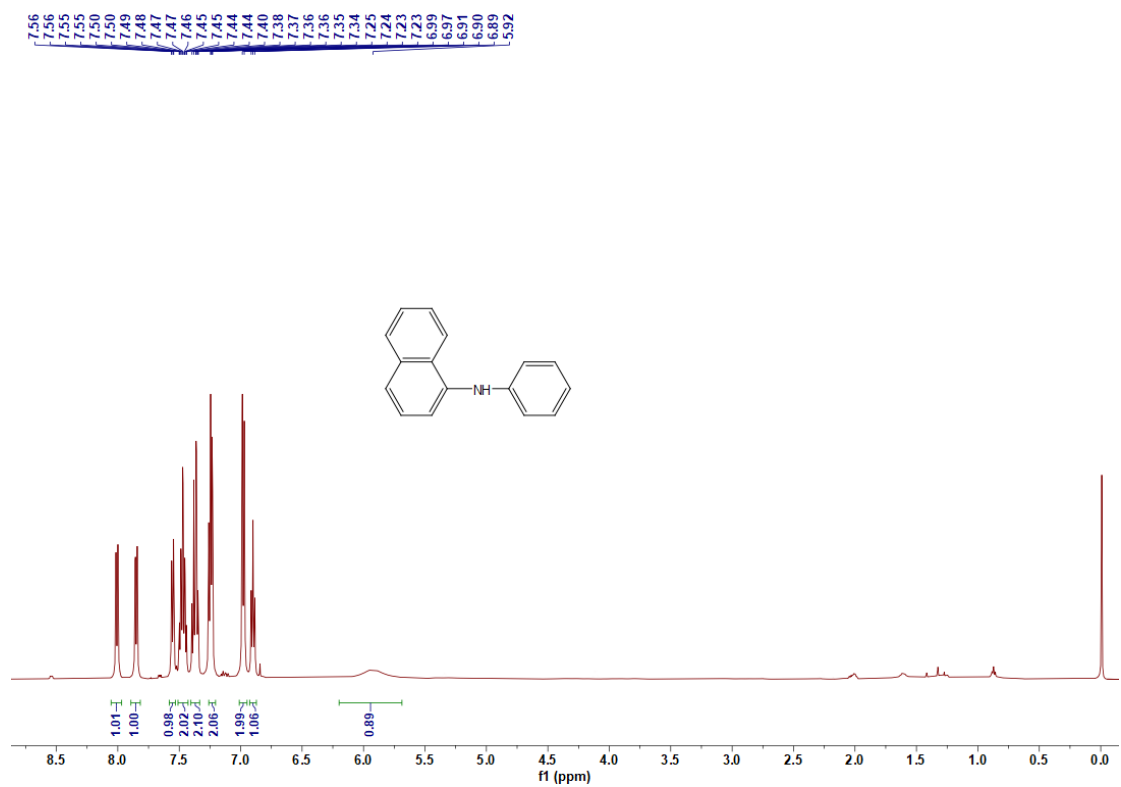

<sup>1</sup>H NMR spectrum of 2i

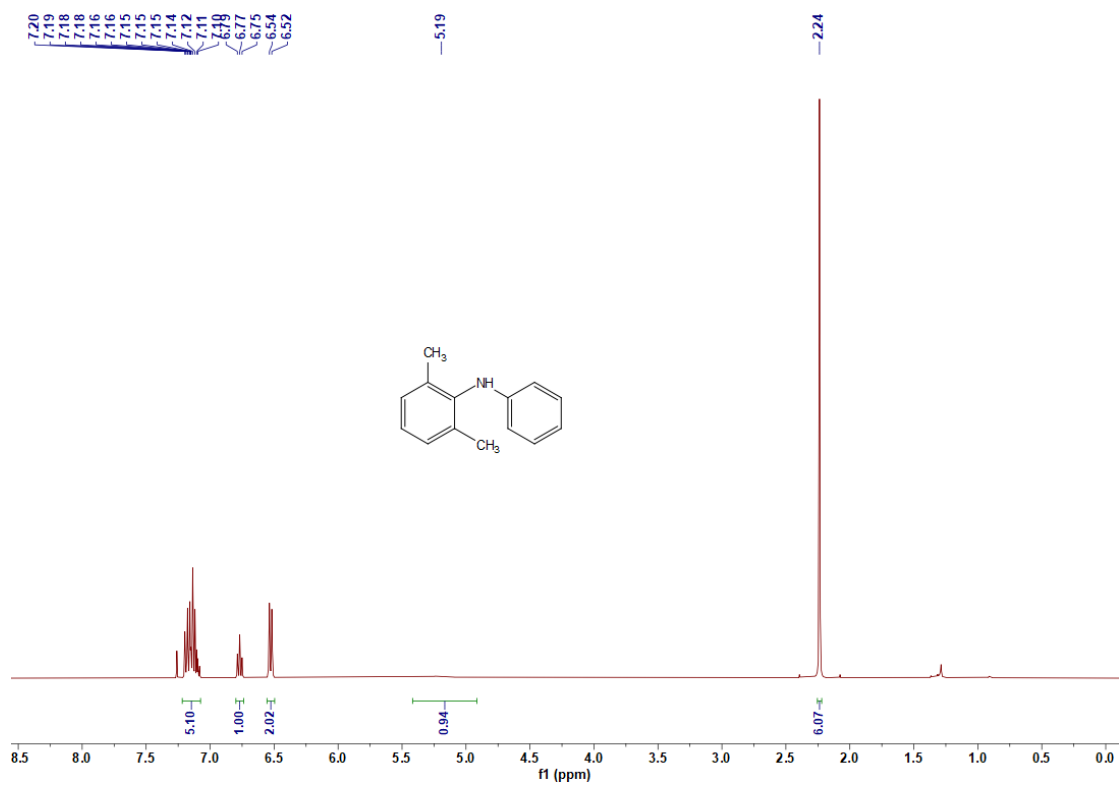

$^1\text{H}$  NMR spectrum of 2j

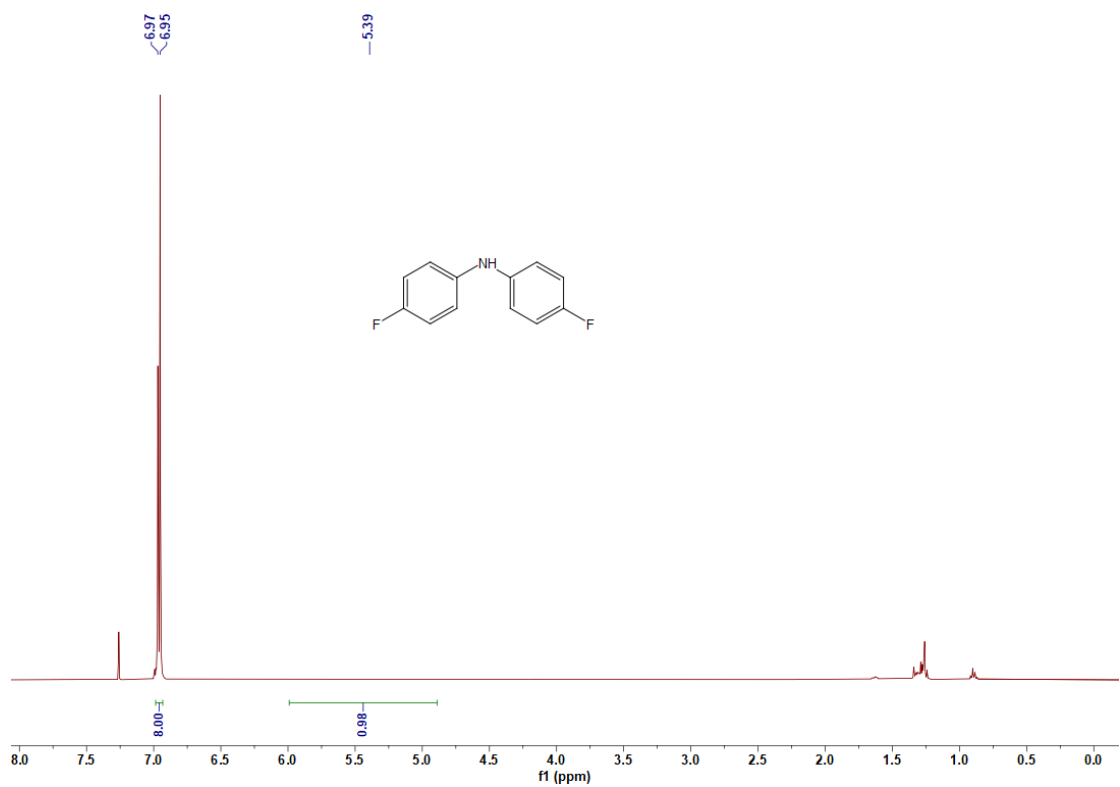

$^1\text{H}$  NMR spectrum of 2k

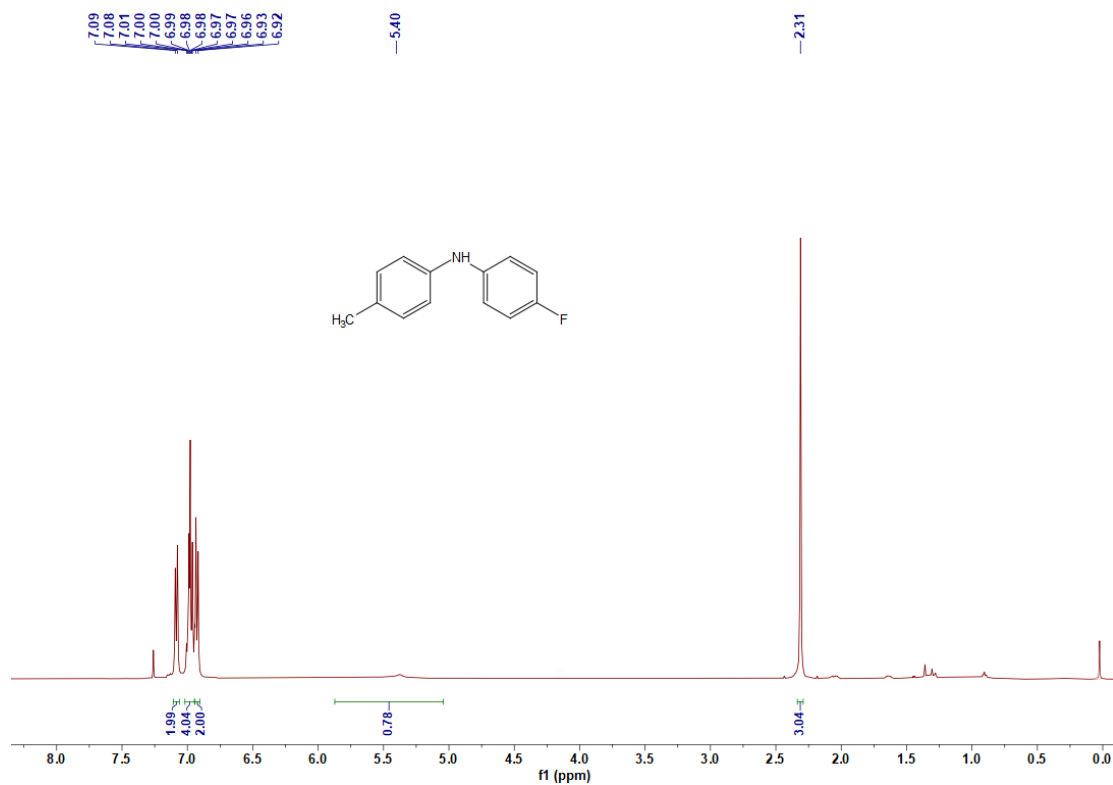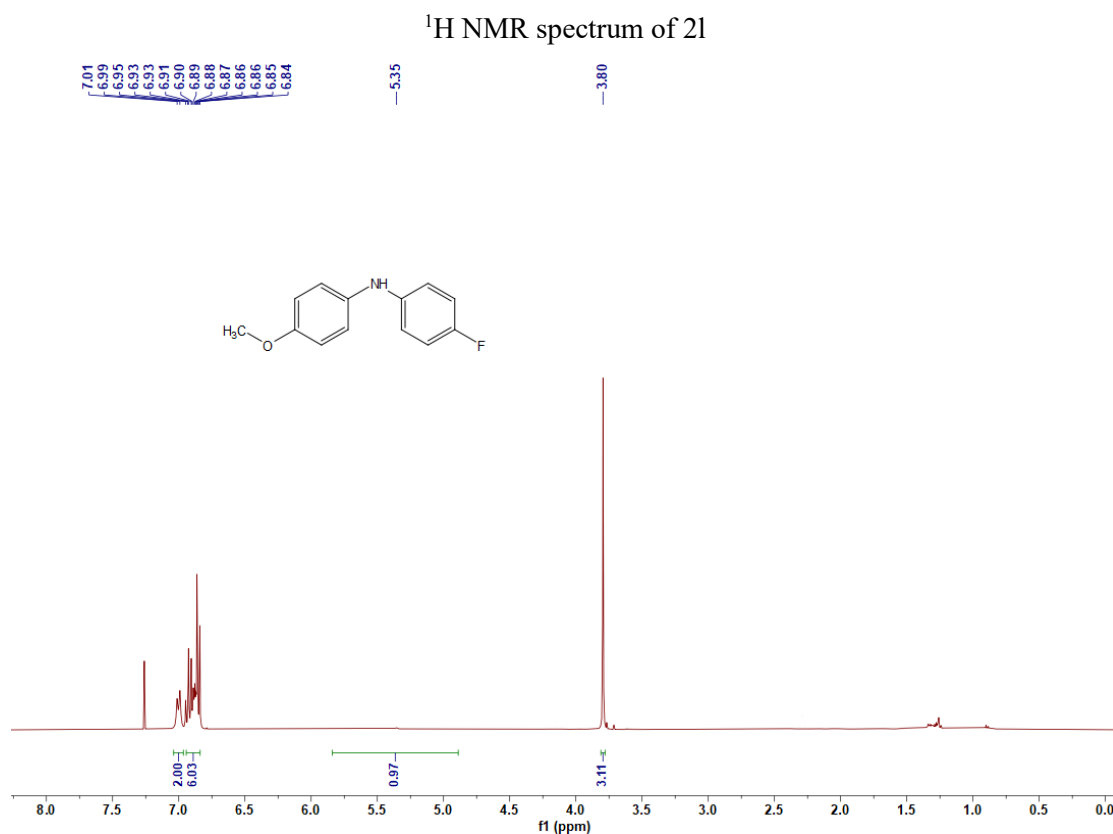

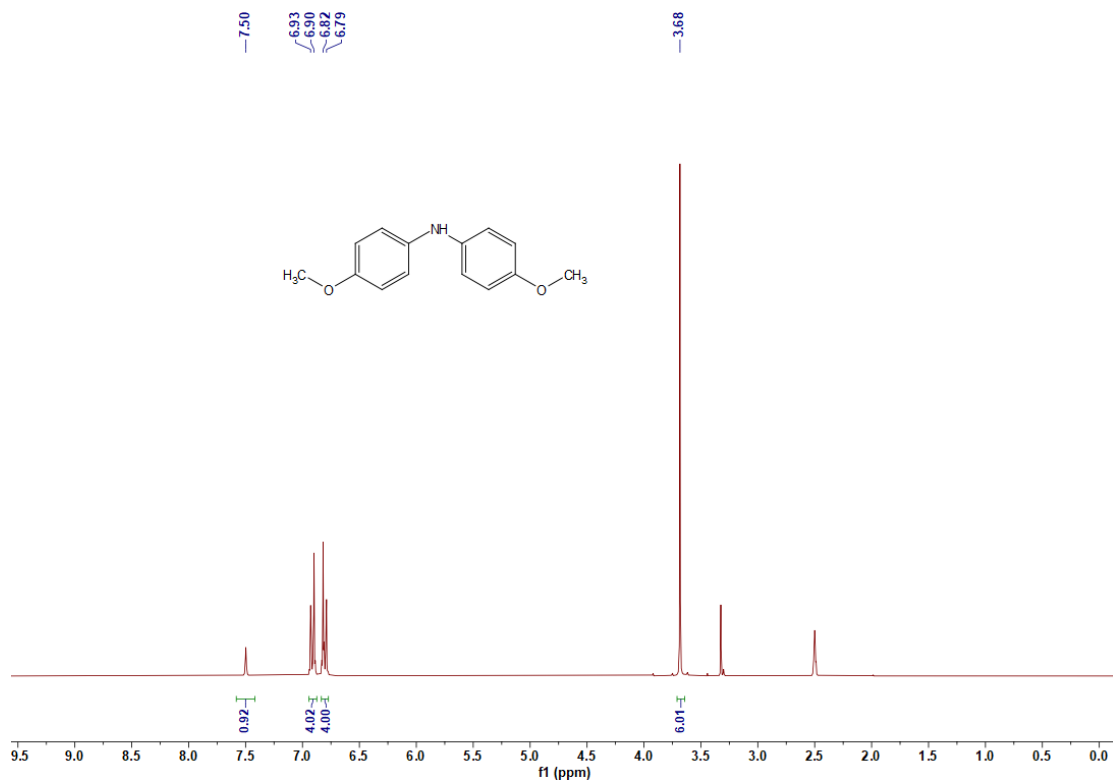

$^1\text{H}$  NMR spectrum of 2n

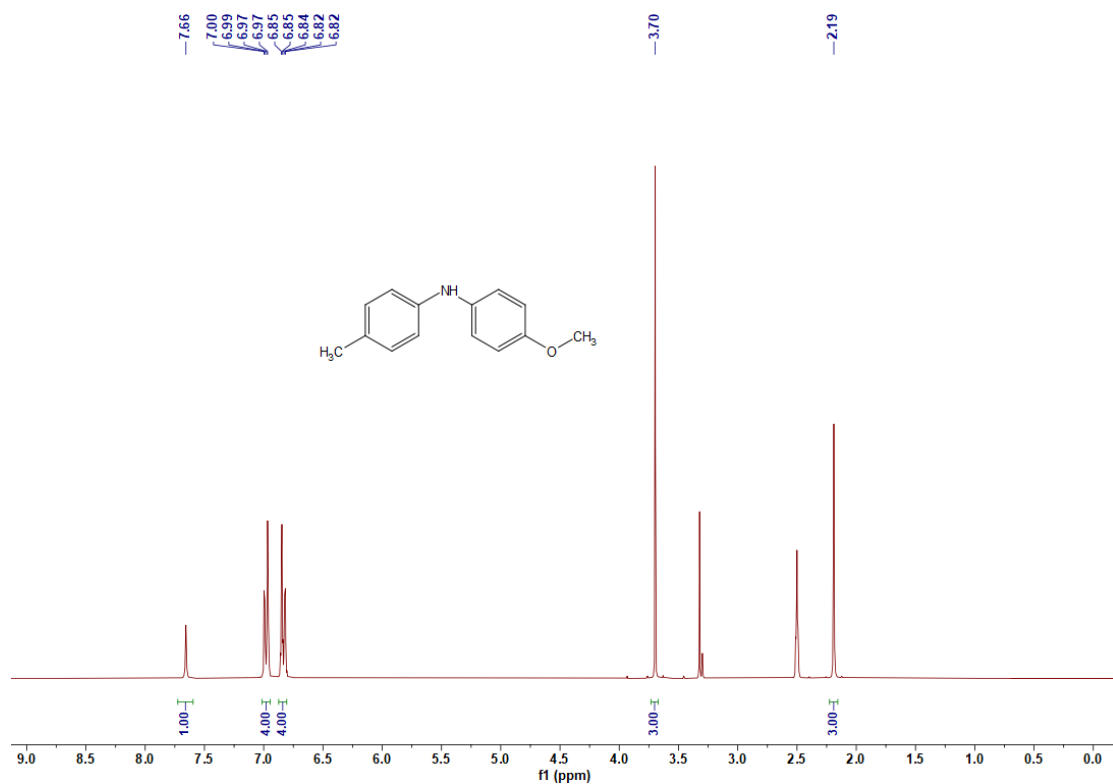

$^1\text{H}$  NMR spectrum of 2o

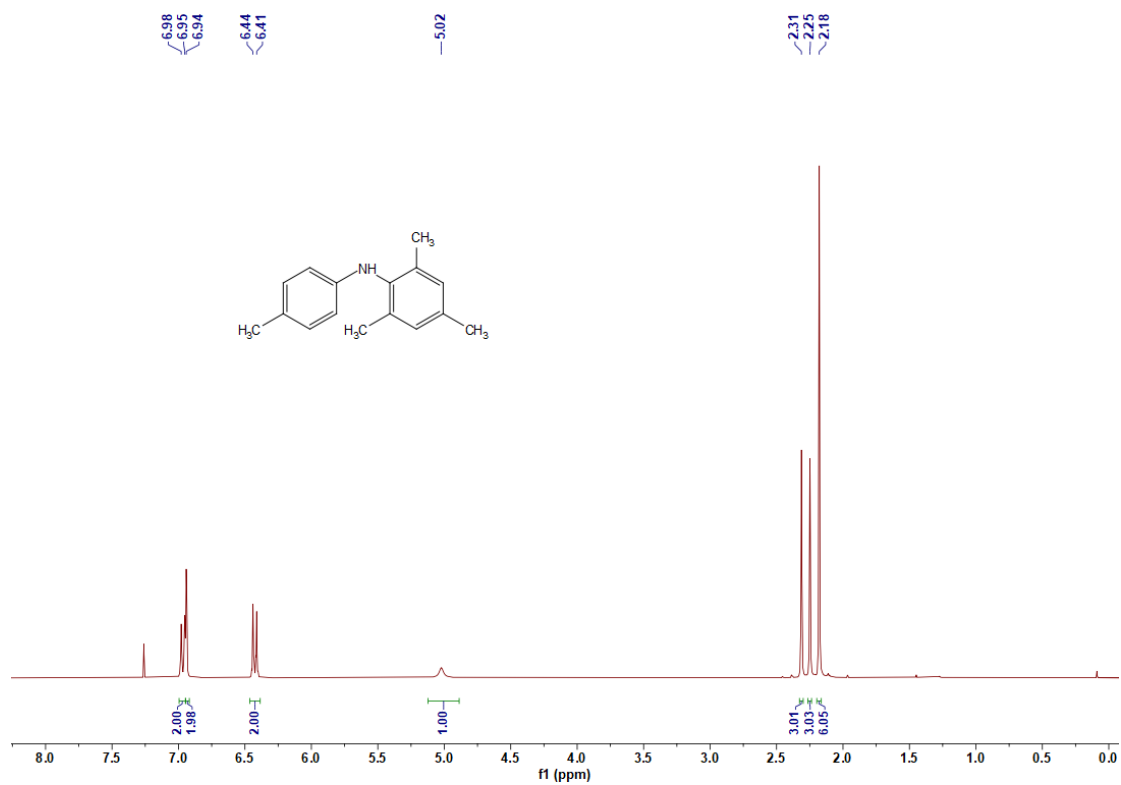

<sup>1</sup>H NMR spectrum of 2p

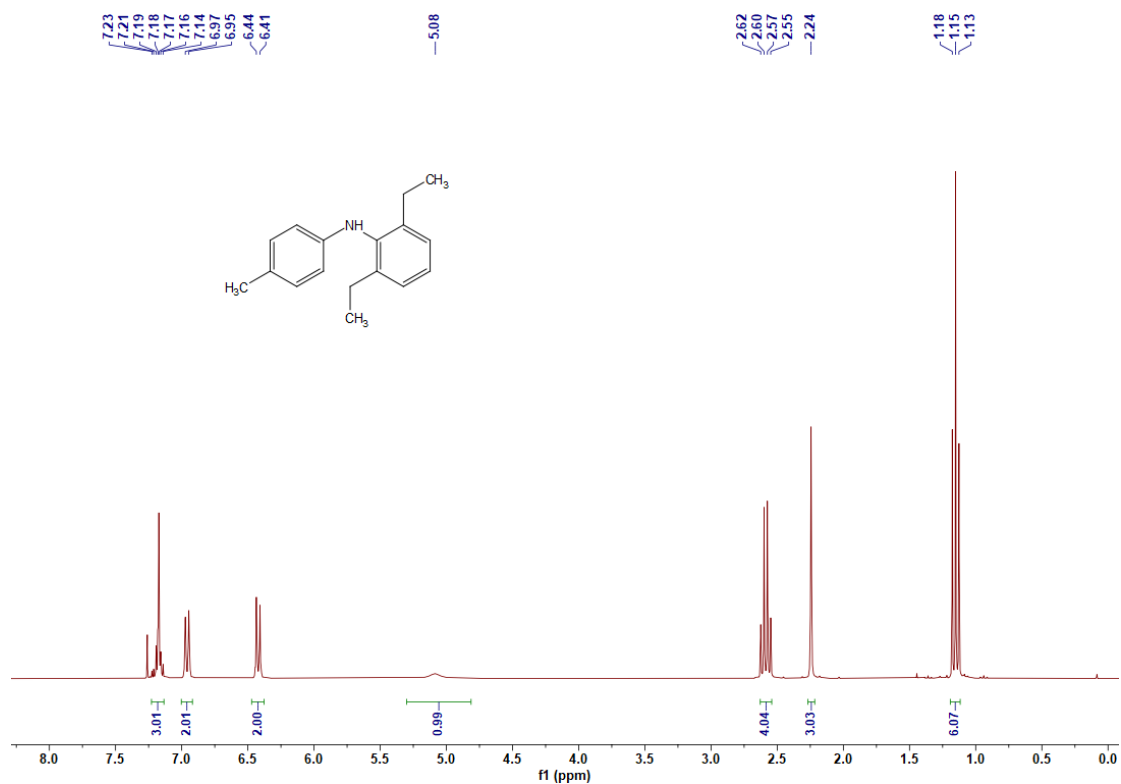

<sup>1</sup>H NMR spectrum of 2q

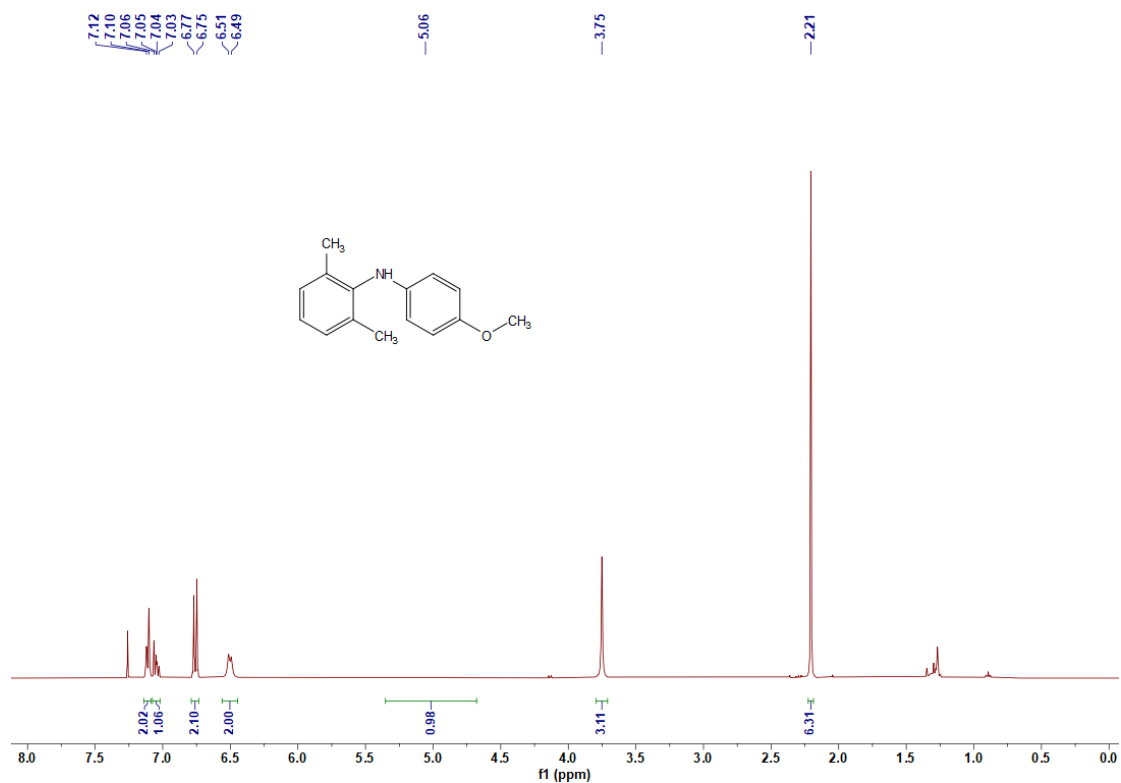

<sup>1</sup>H NMR spectrum of 2r

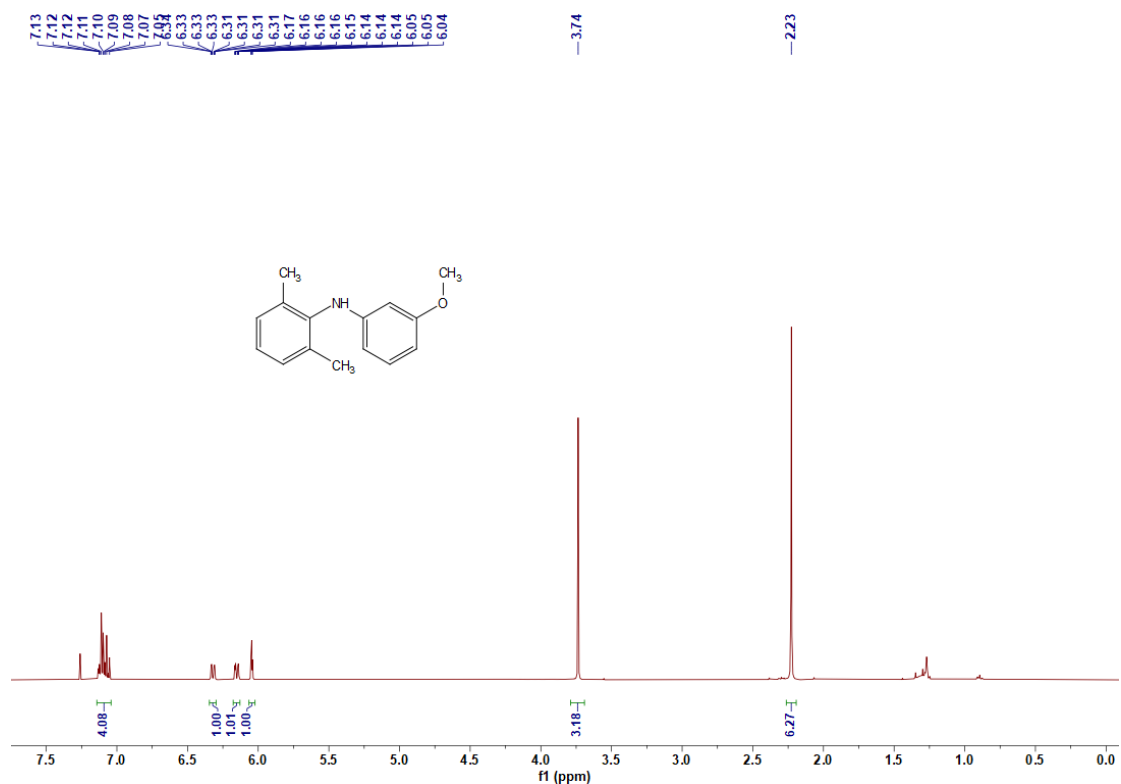

<sup>1</sup>H NMR spectrum of 2s

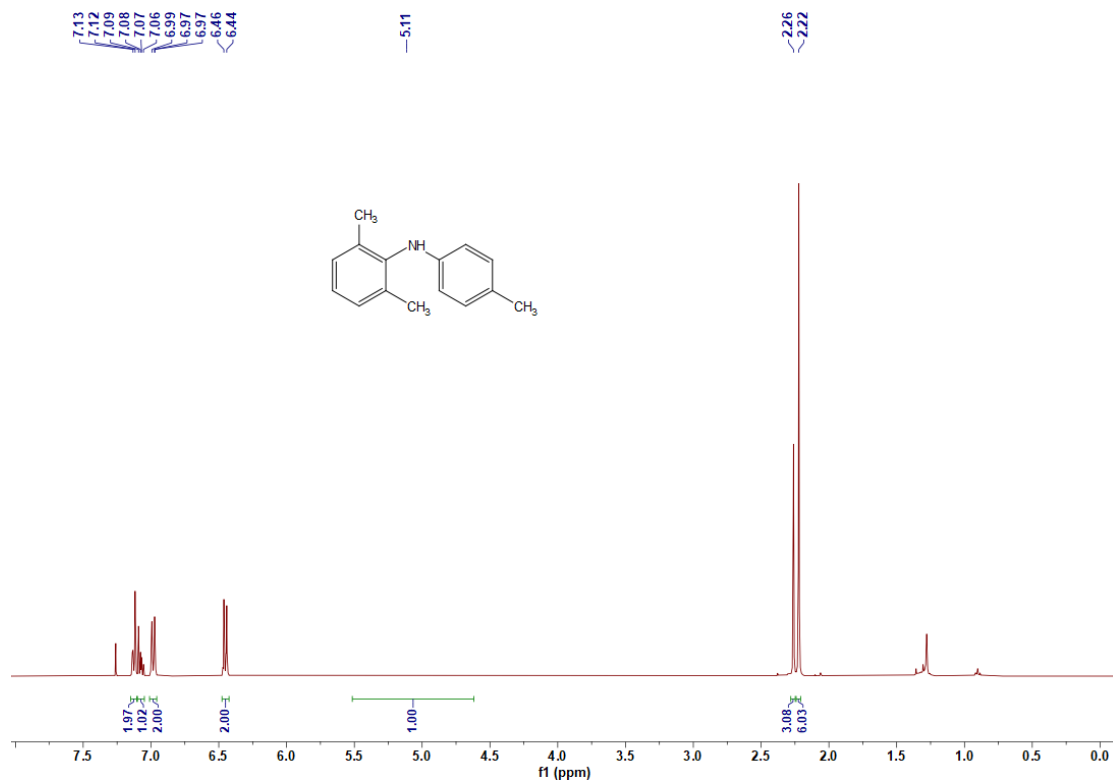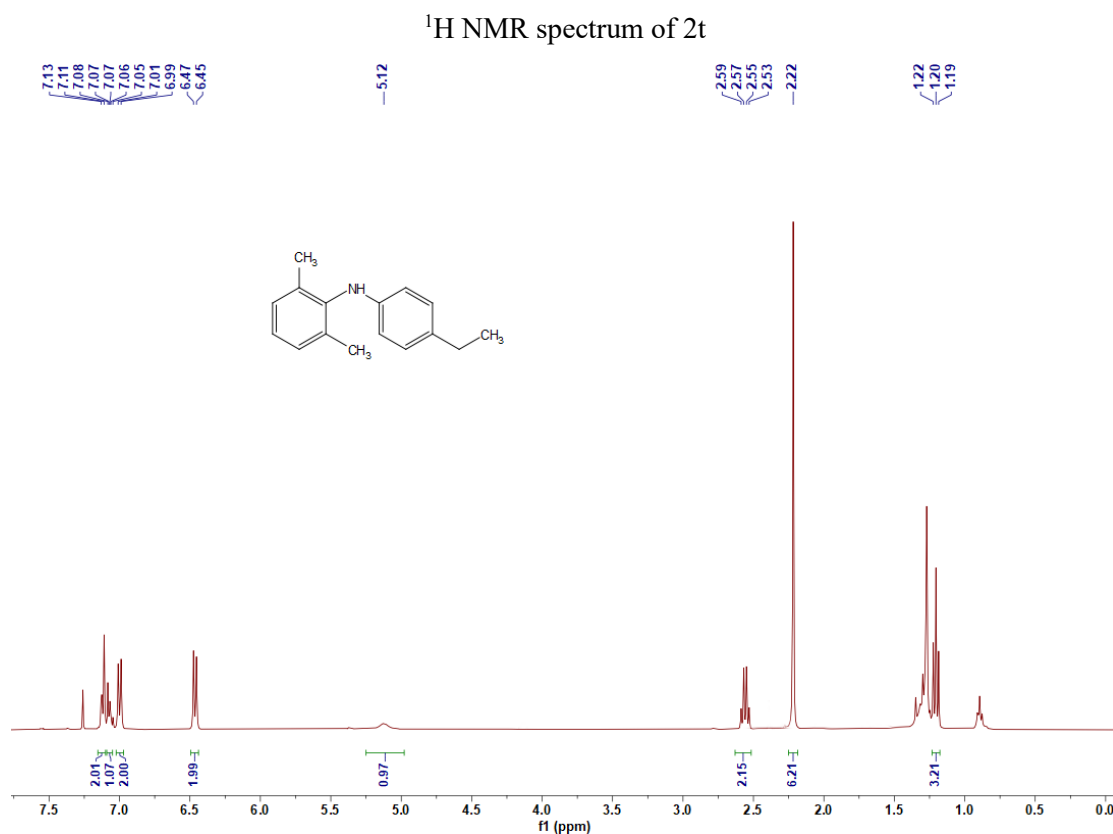

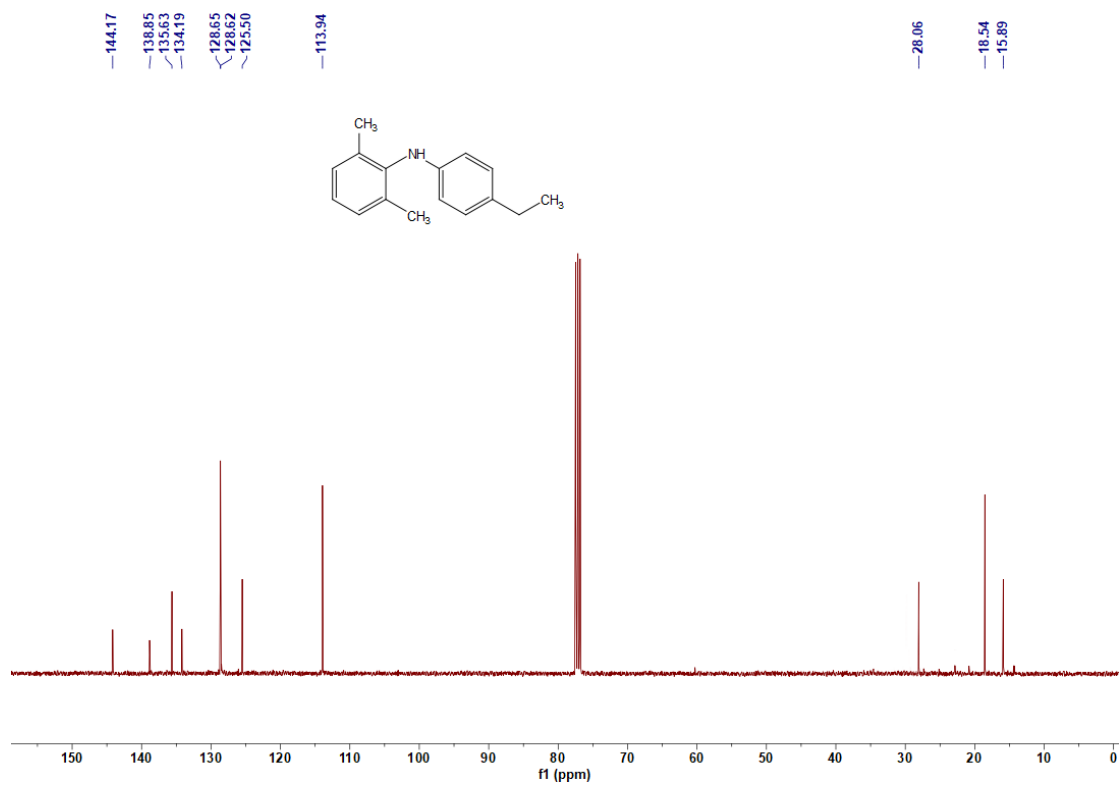

$^{13}\text{C}$  NMR spectrum of 2u

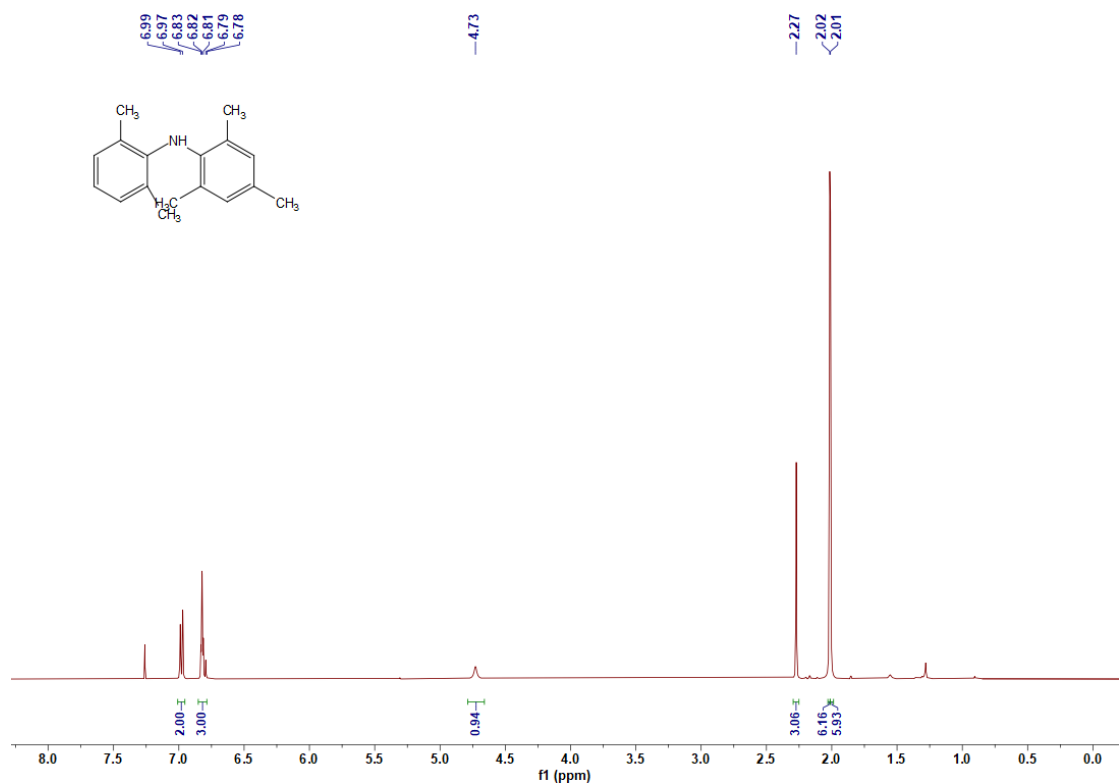

$^1\text{H}$  NMR spectrum of 2v

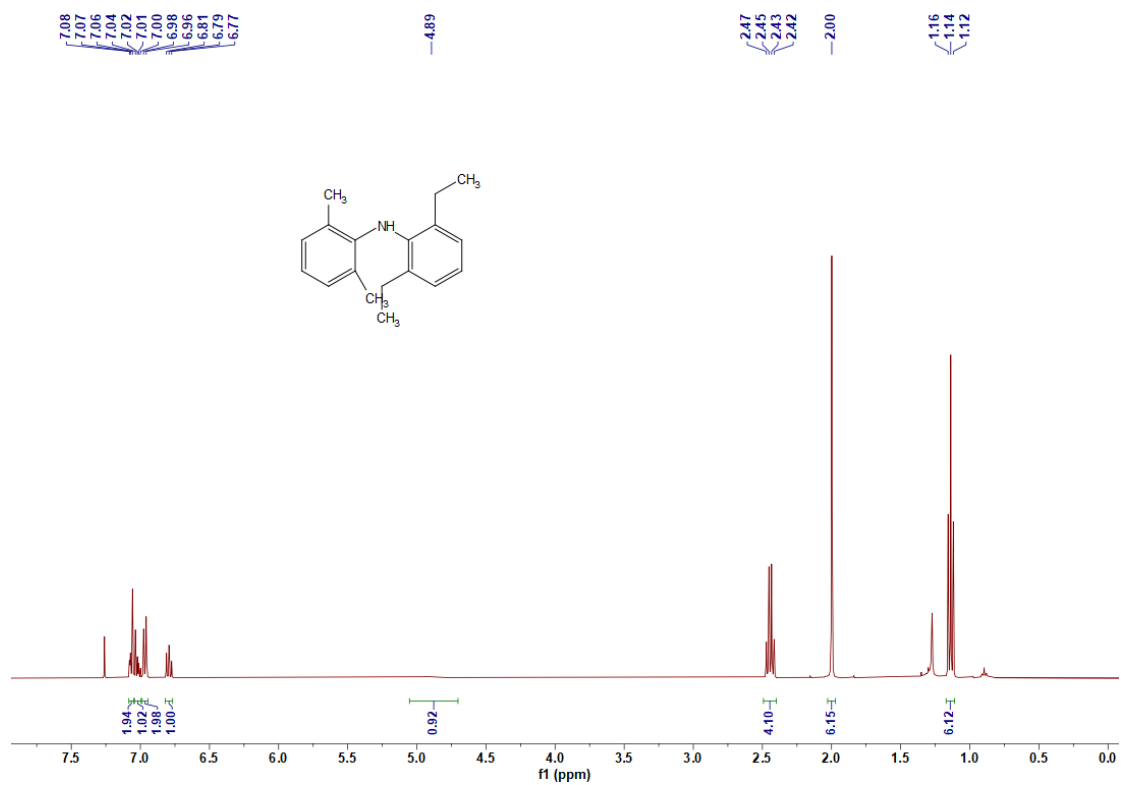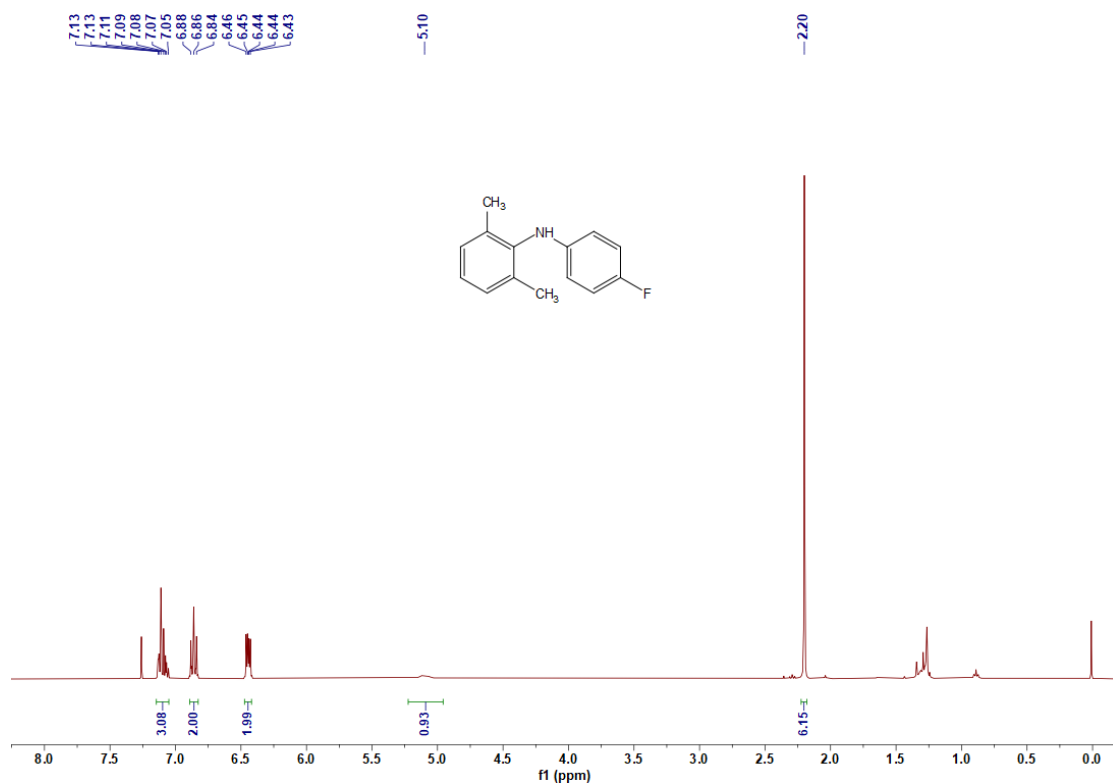

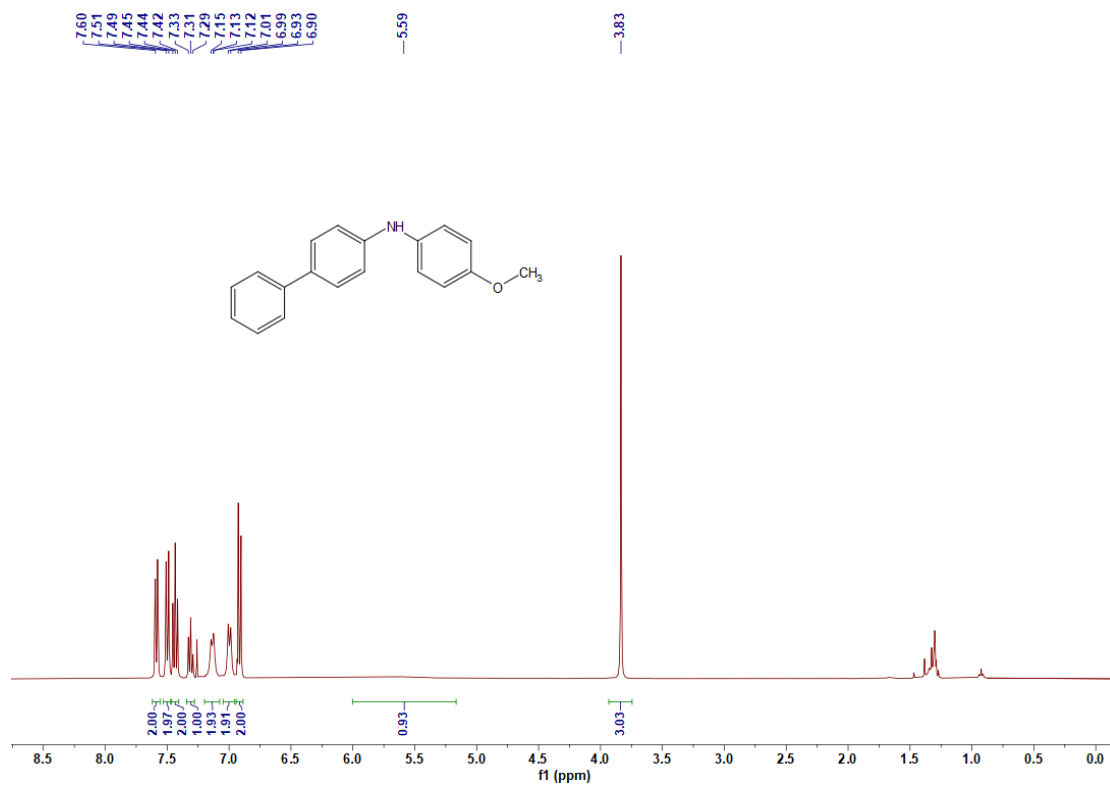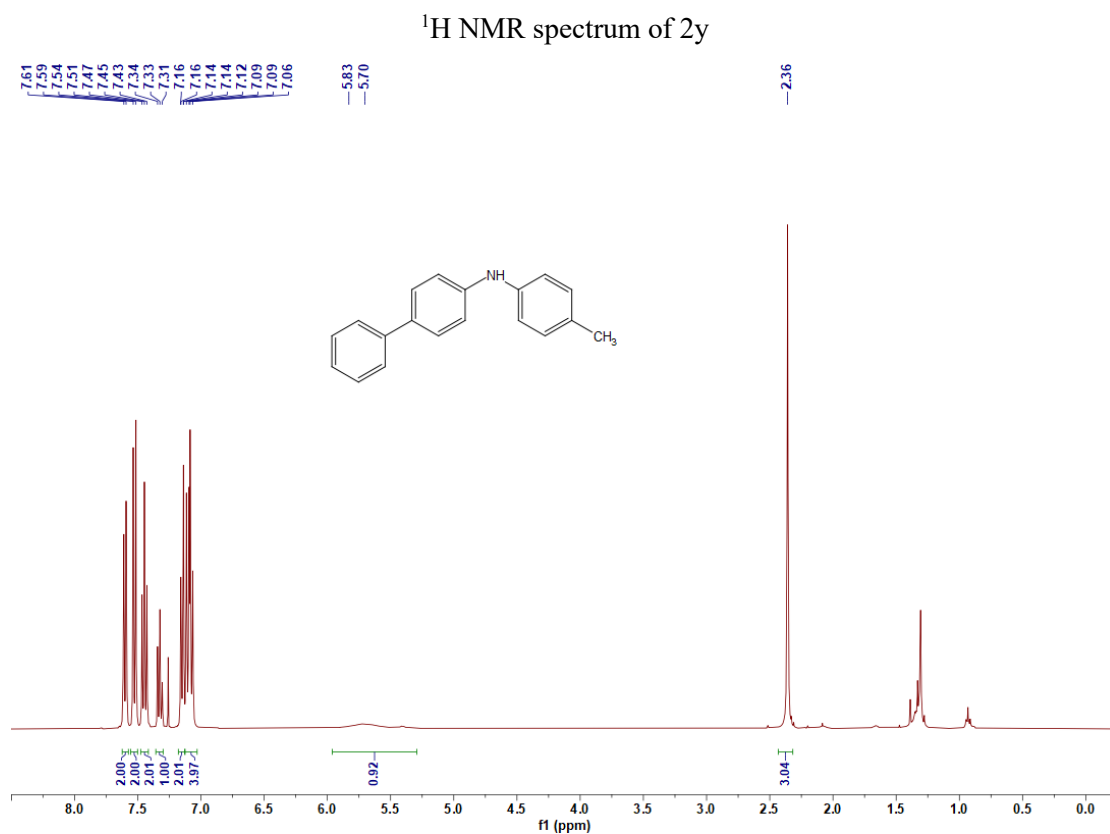

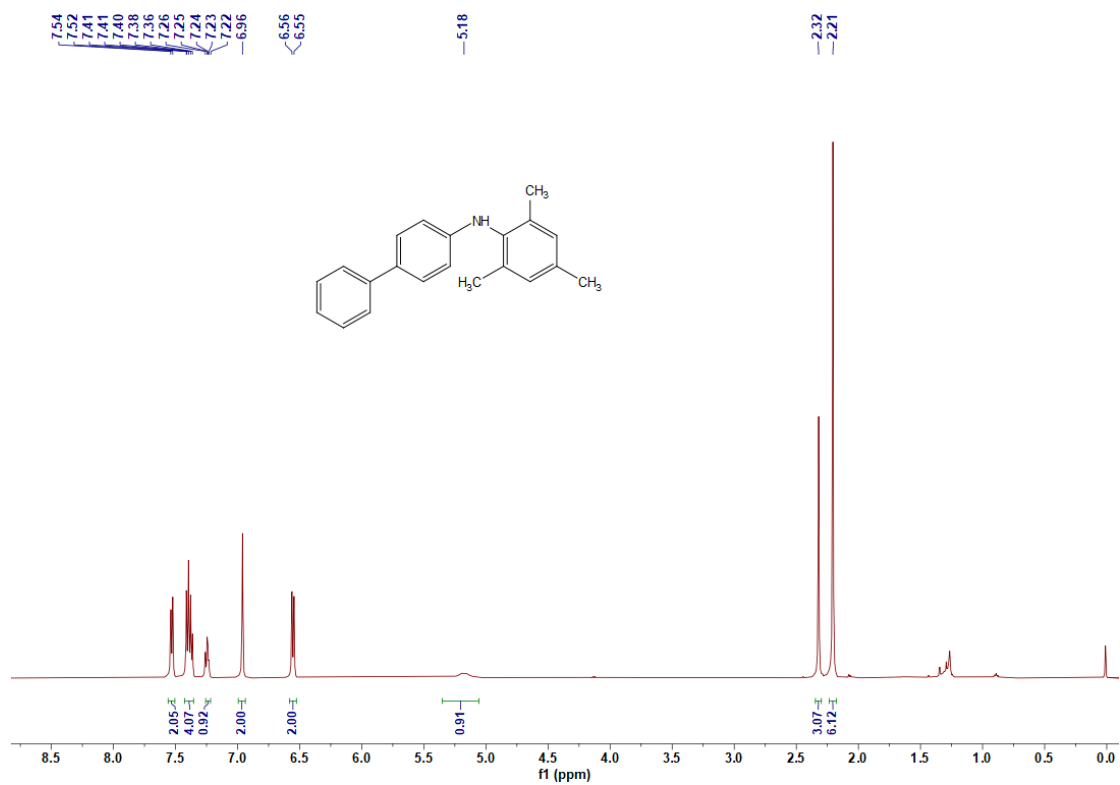

<sup>1</sup>H NMR spectrum of 2a

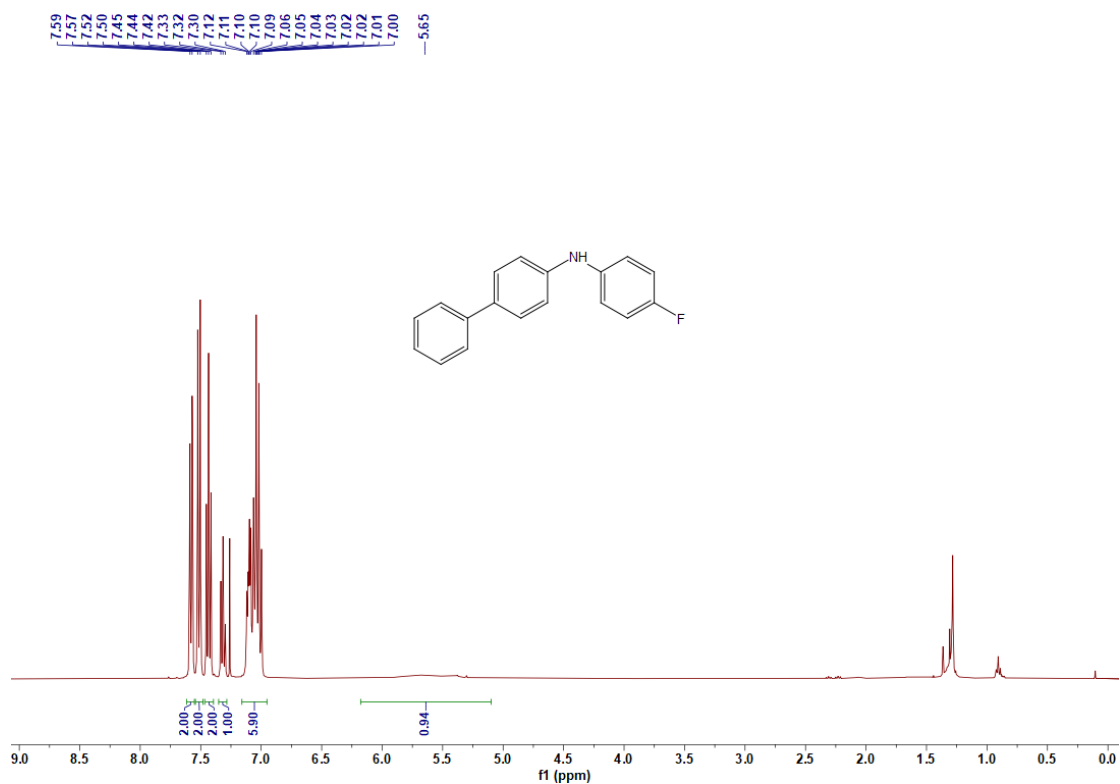

<sup>1</sup>H NMR spectrum of 2b

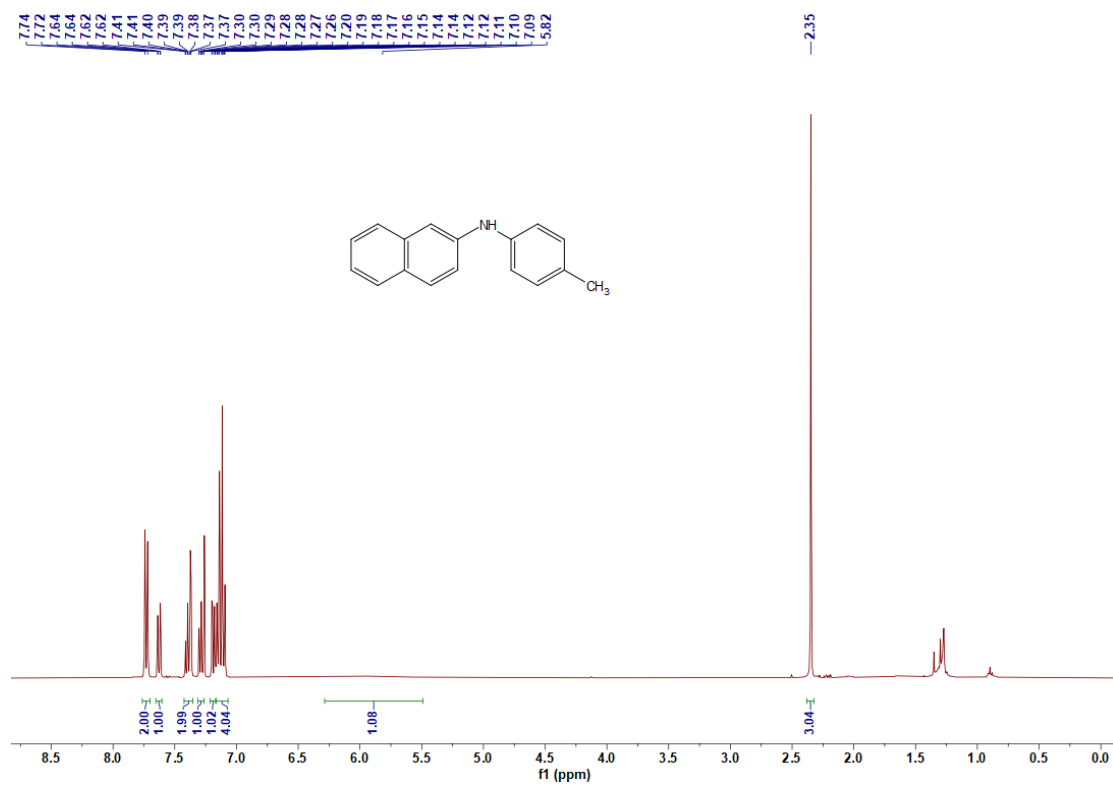

<sup>1</sup>H NMR spectrum of 2ac

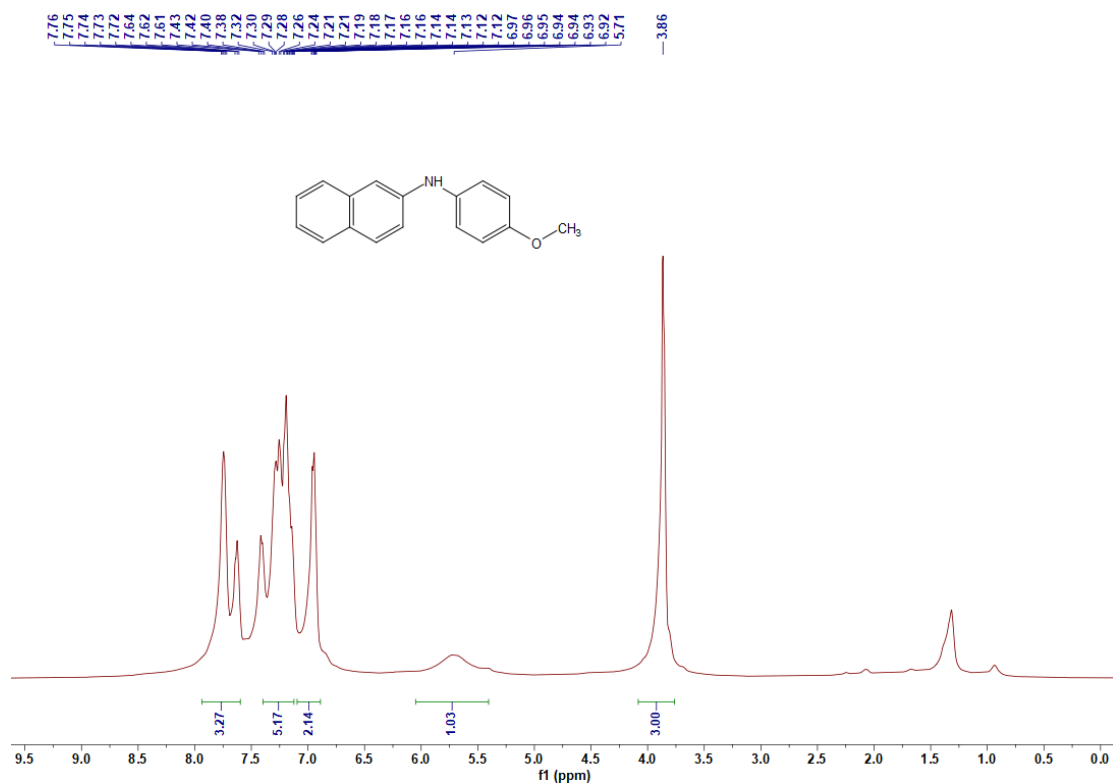

<sup>1</sup>H NMR spectrum of 2ad

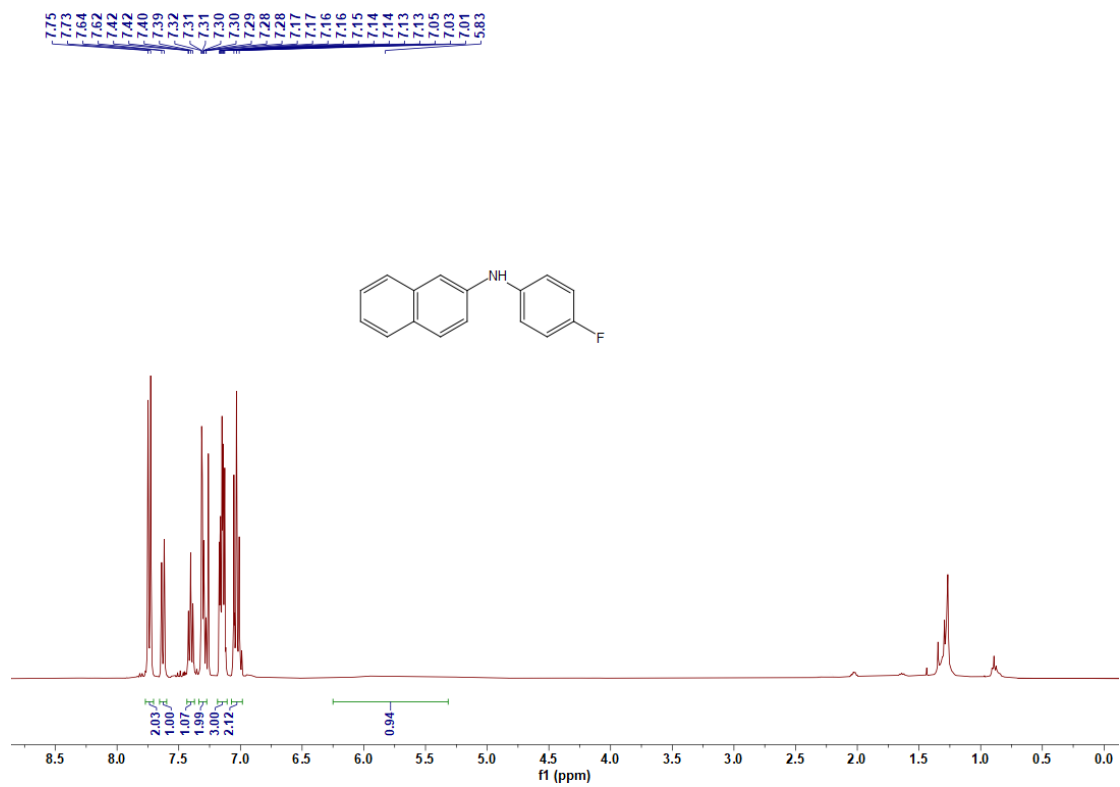

$^1\text{H}$  NMR spectrum of 2ae

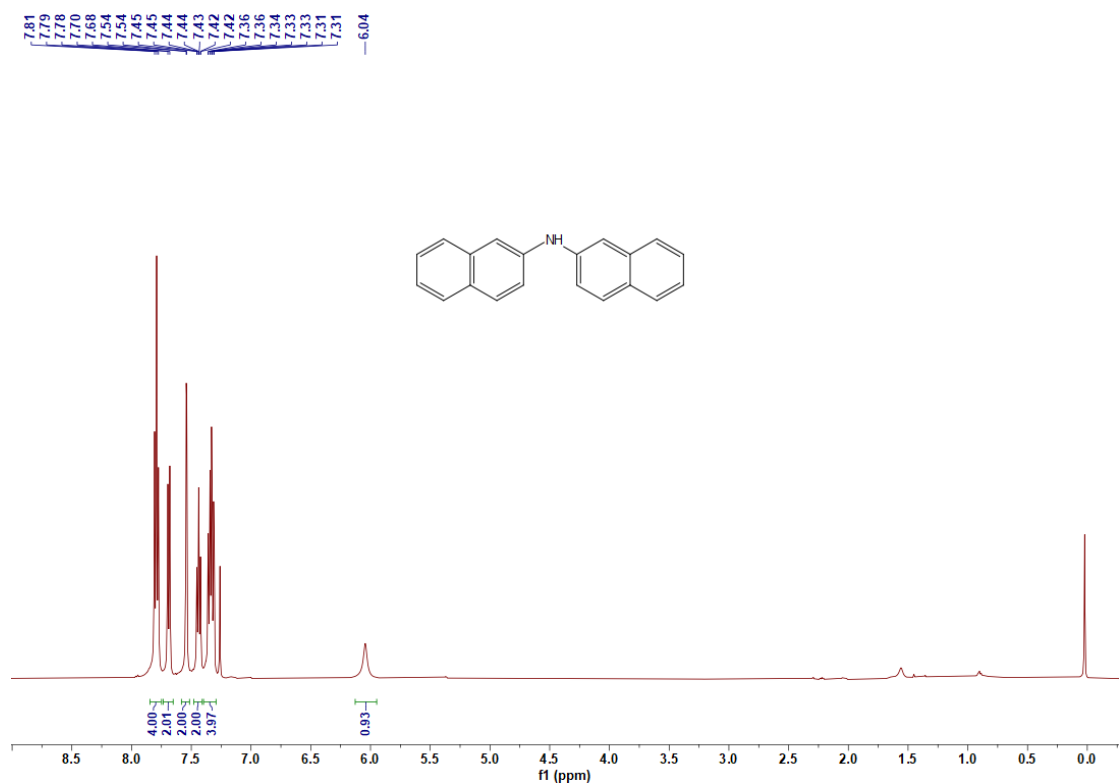

$^1\text{H}$  NMR spectrum of 2af

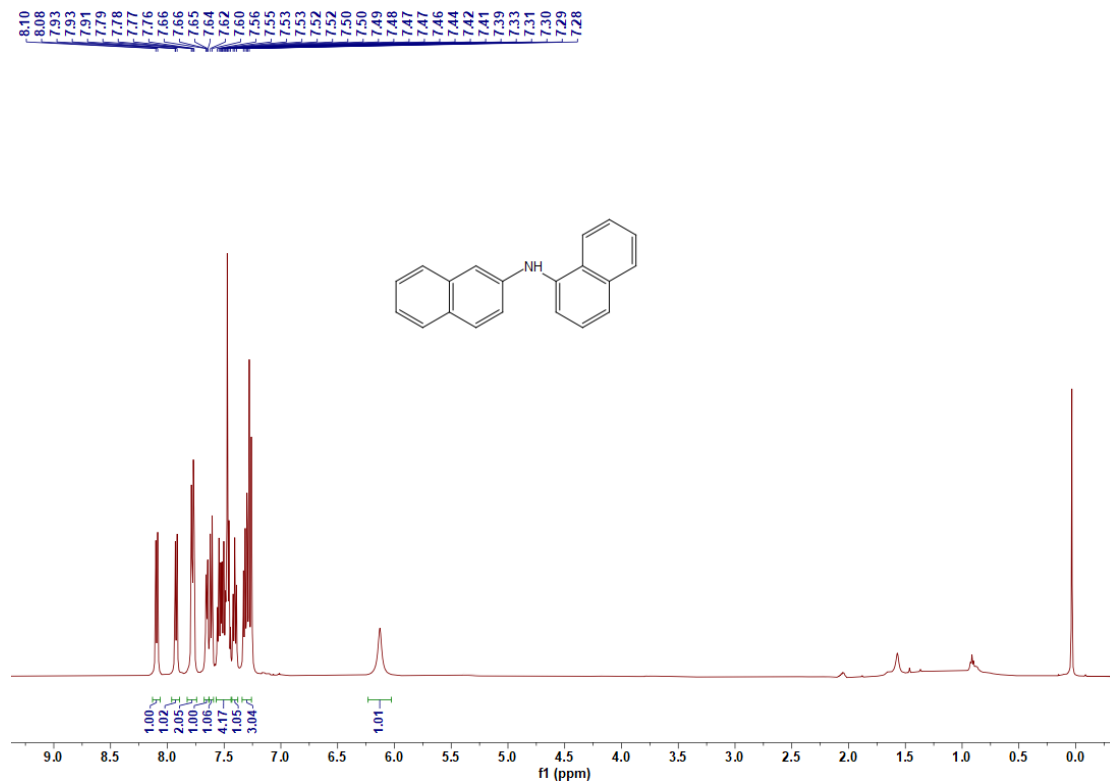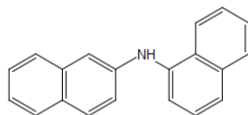

$^1\text{H}$  NMR spectrum of 2a

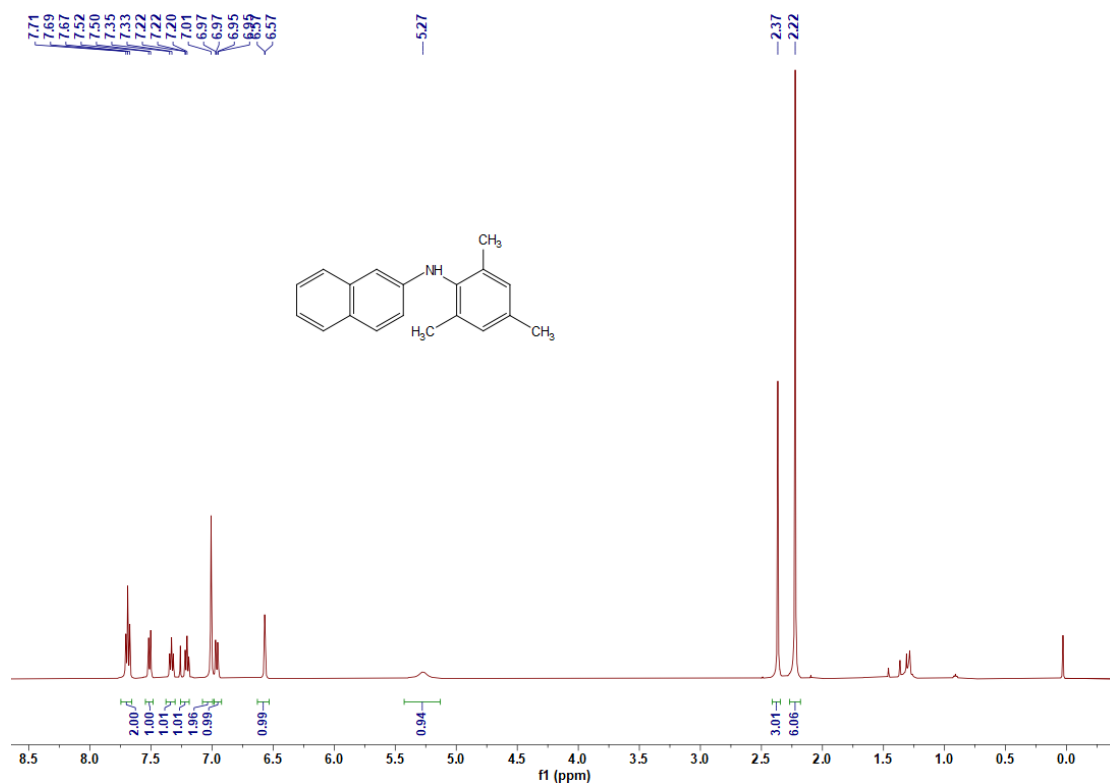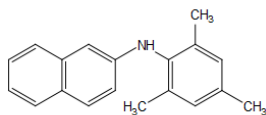

$^1\text{H}$  NMR spectrum of 2ah

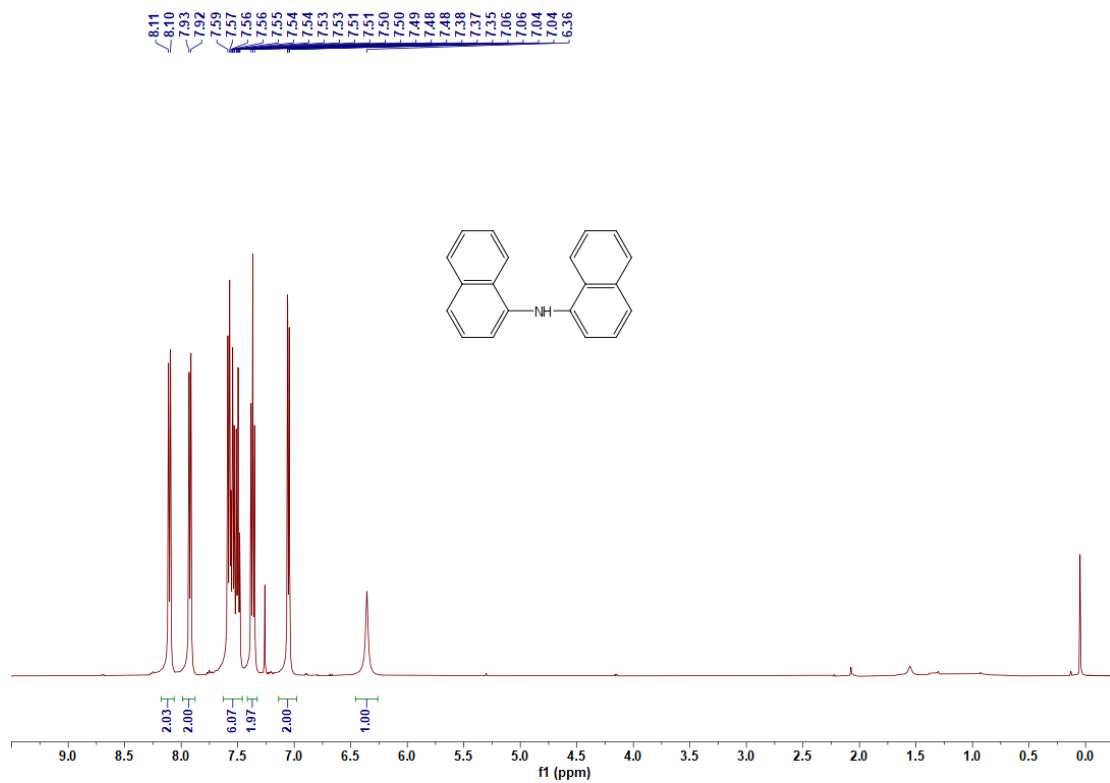

<sup>1</sup>H NMR spectrum of 2ai

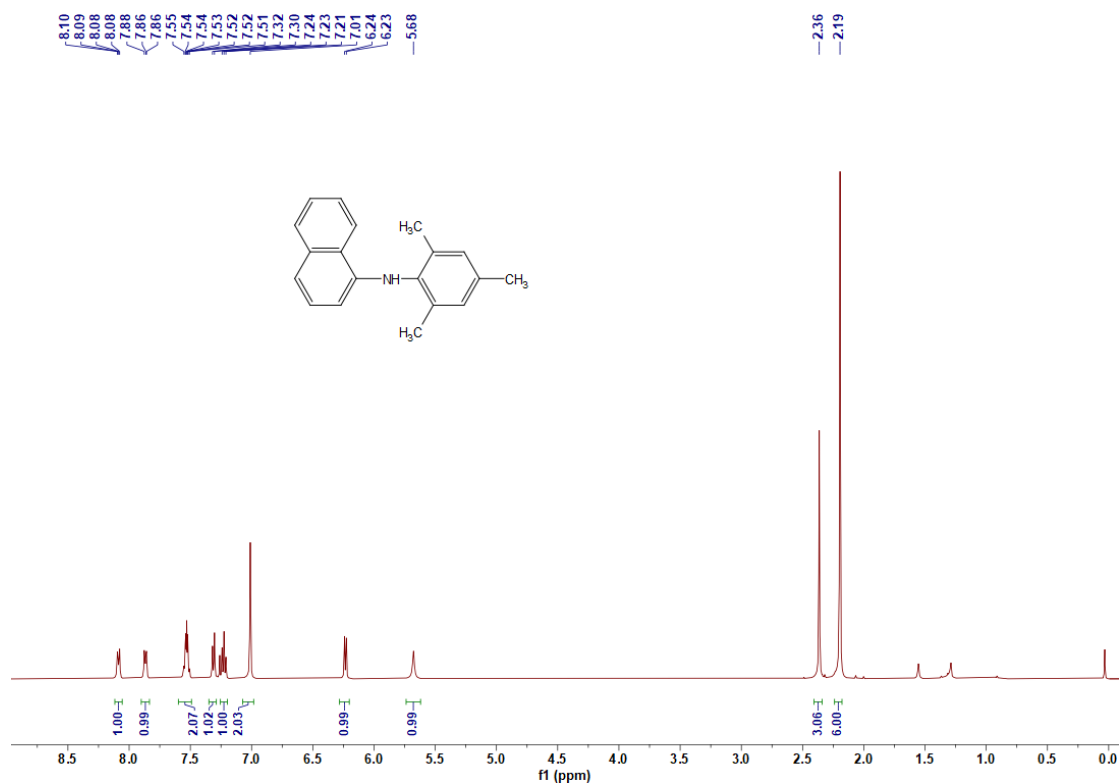

<sup>1</sup>H NMR spectrum of 2aj

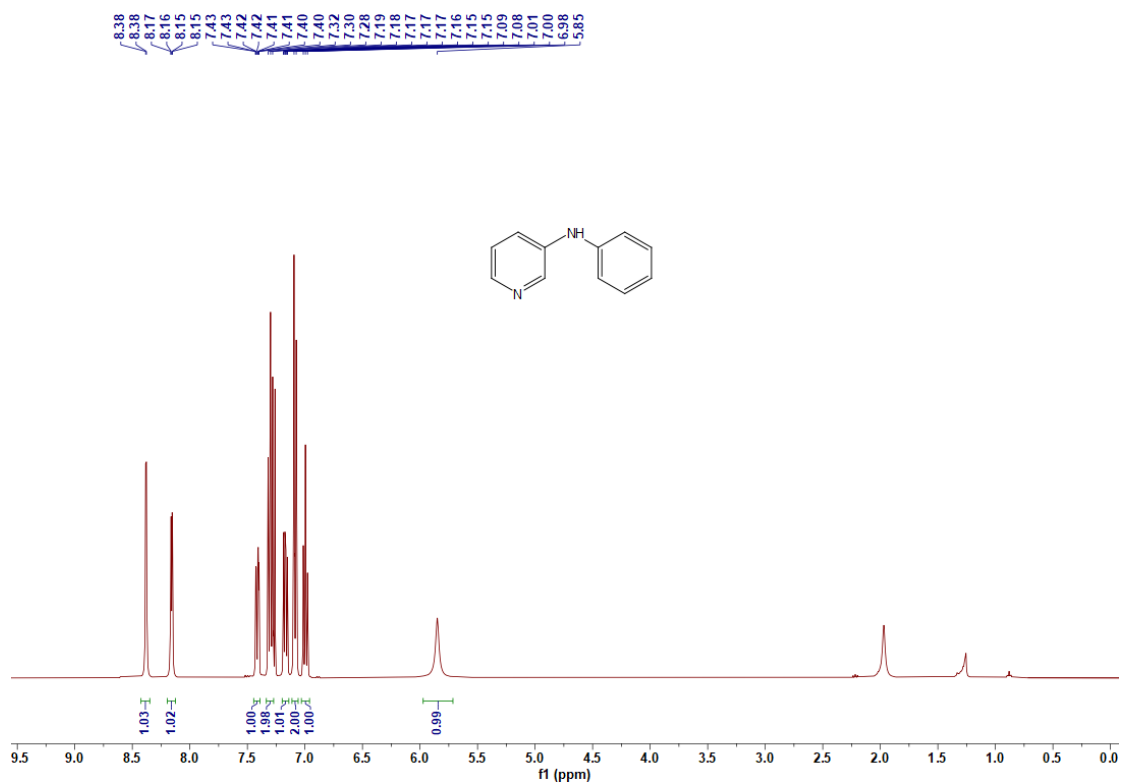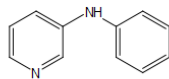

<sup>1</sup>H NMR spectrum of 6a

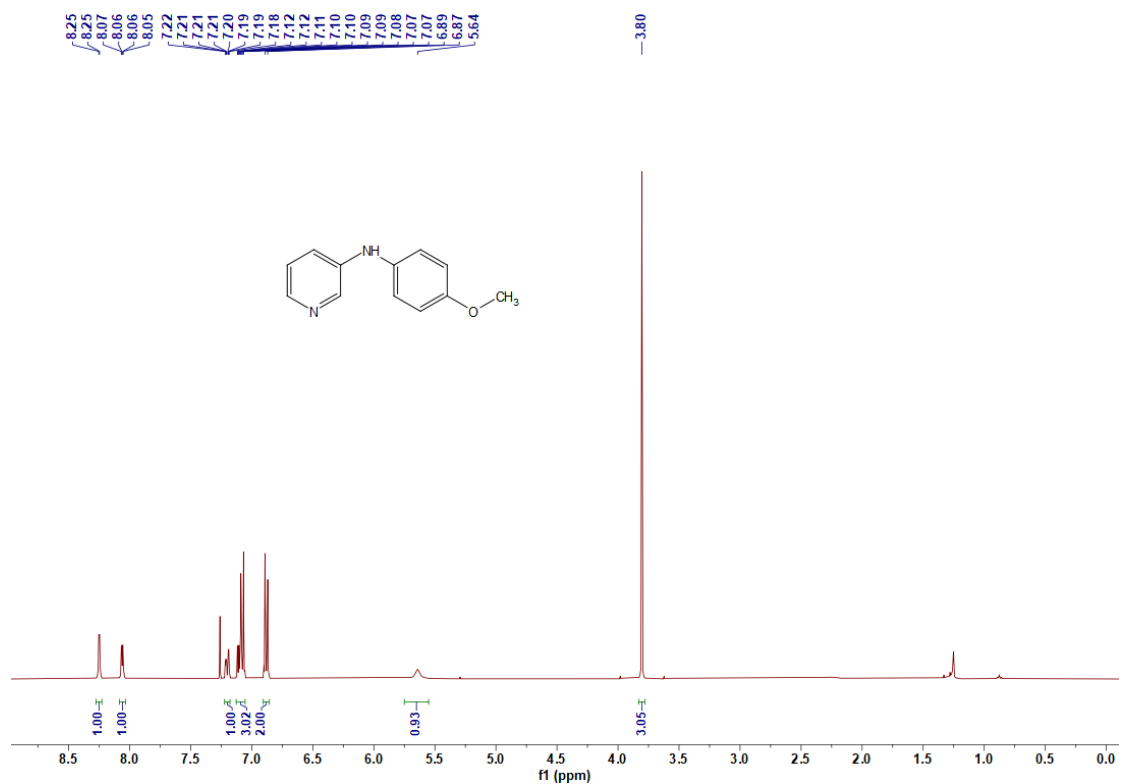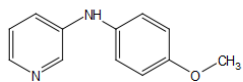

<sup>1</sup>H NMR spectrum of 6b

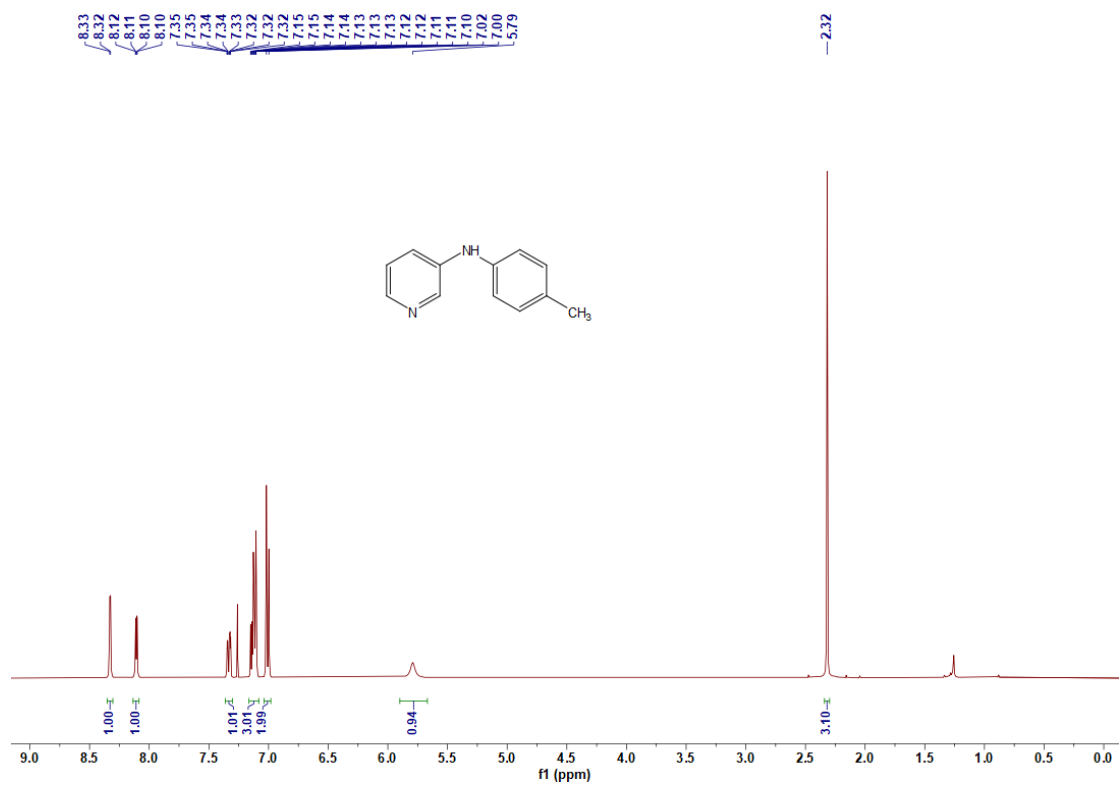

<sup>1</sup>H NMR spectrum of 6c

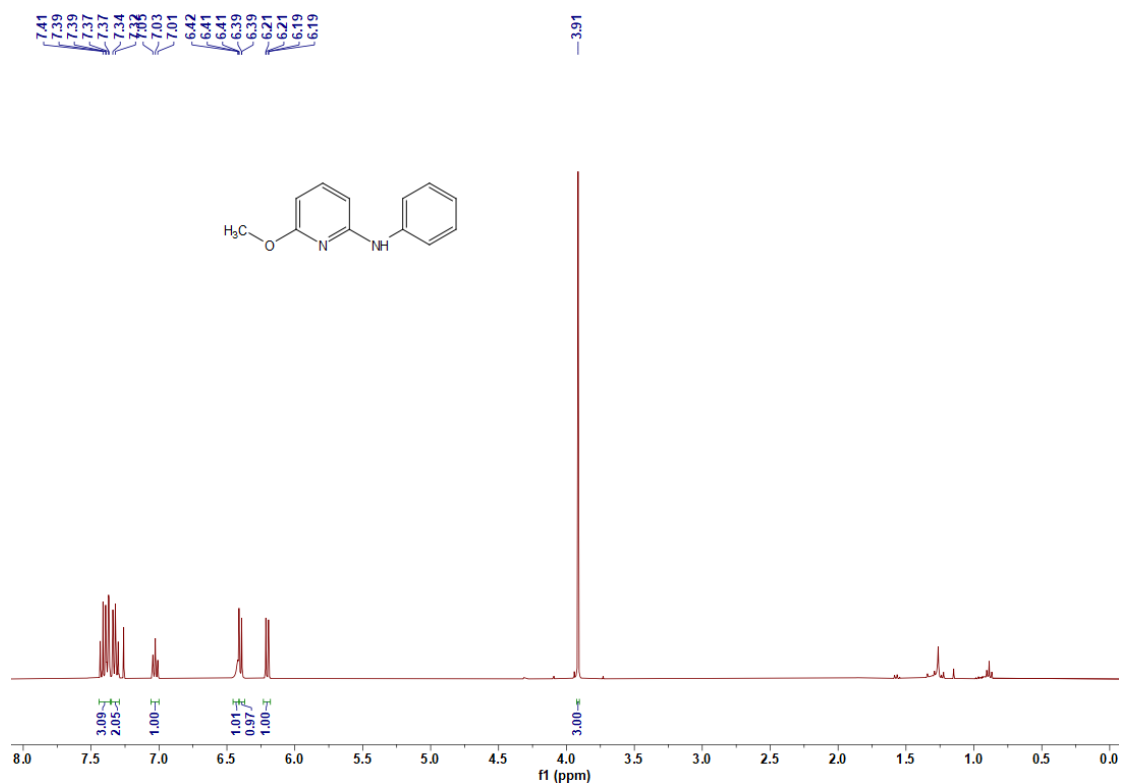

<sup>1</sup>H NMR spectrum of 6d

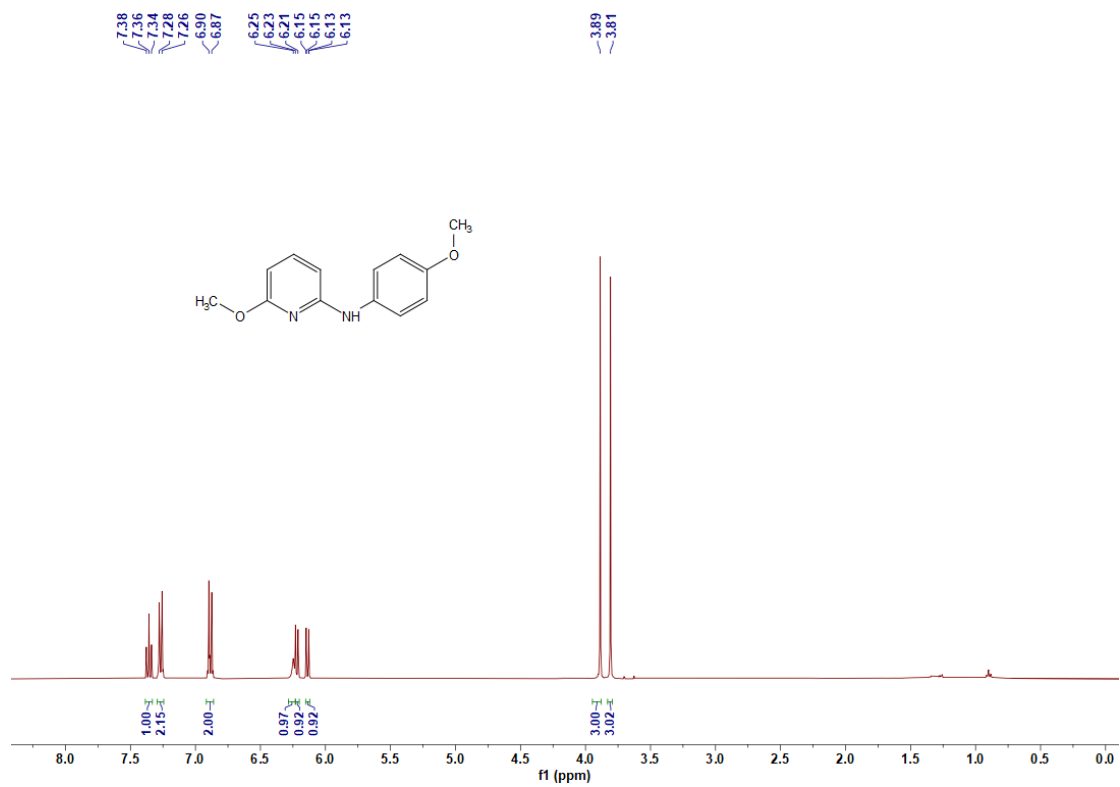

<sup>1</sup>H NMR spectrum of 6e

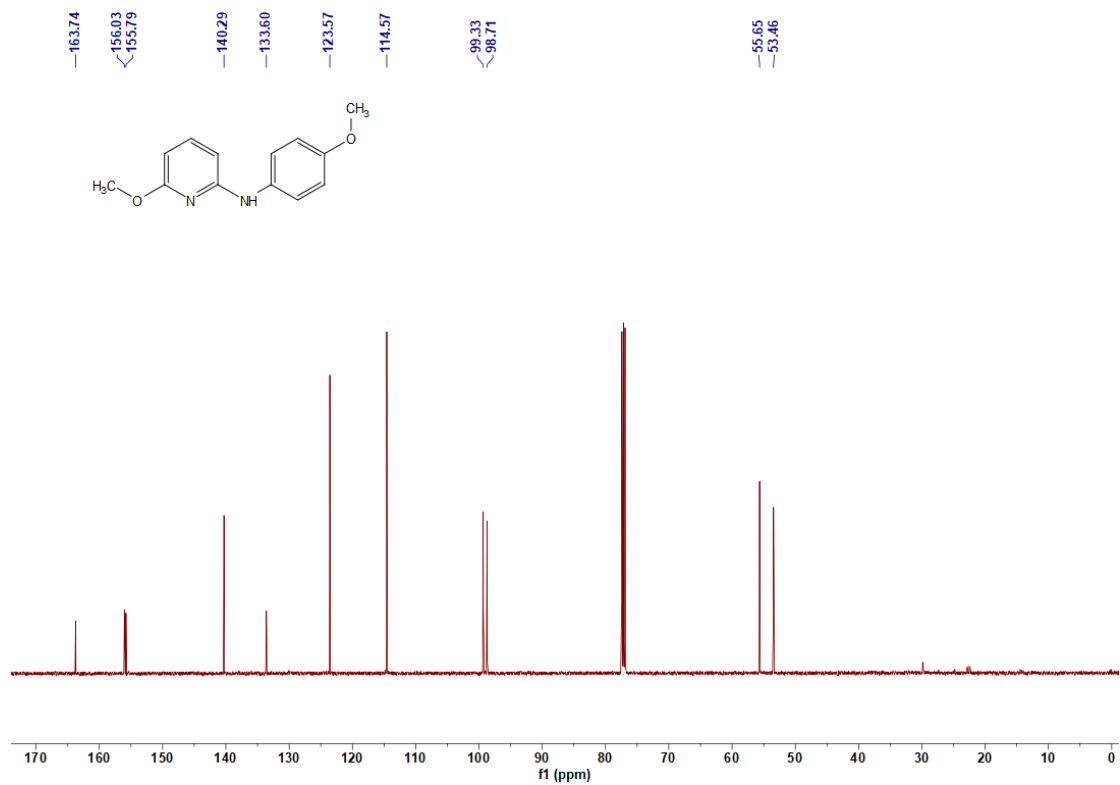

<sup>13</sup>C NMR spectrum of 6e

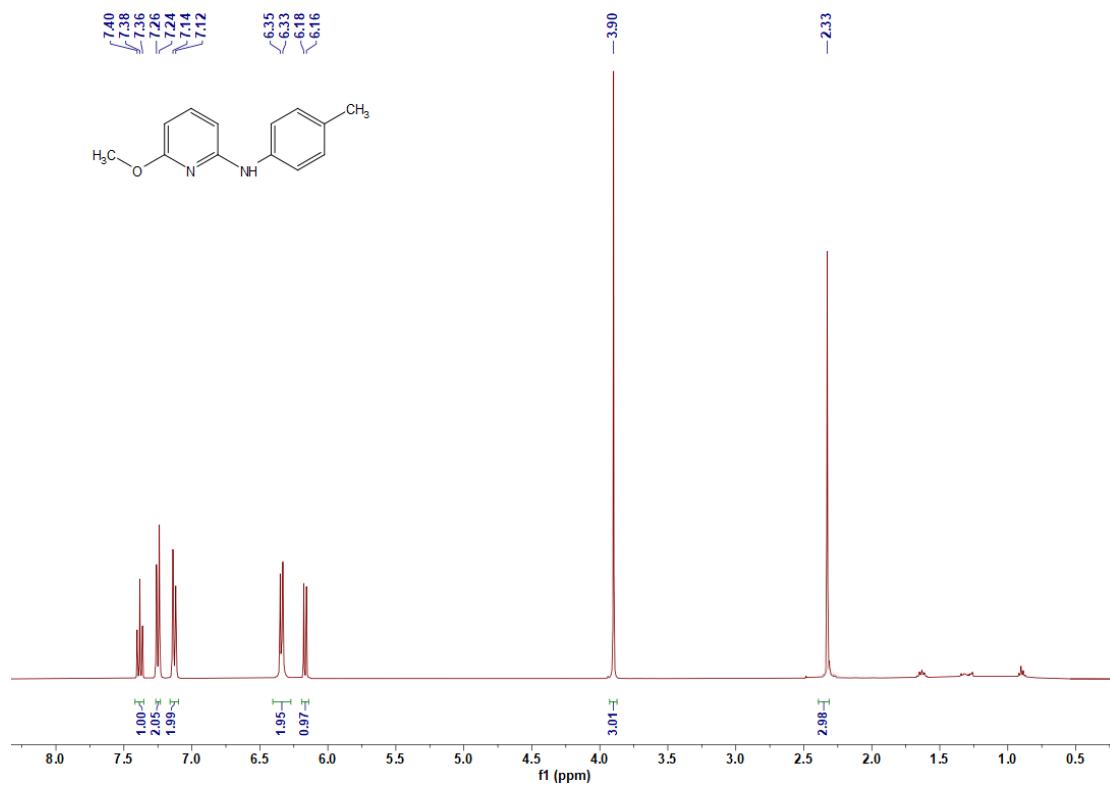

<sup>1</sup>H NMR spectrum of 6f

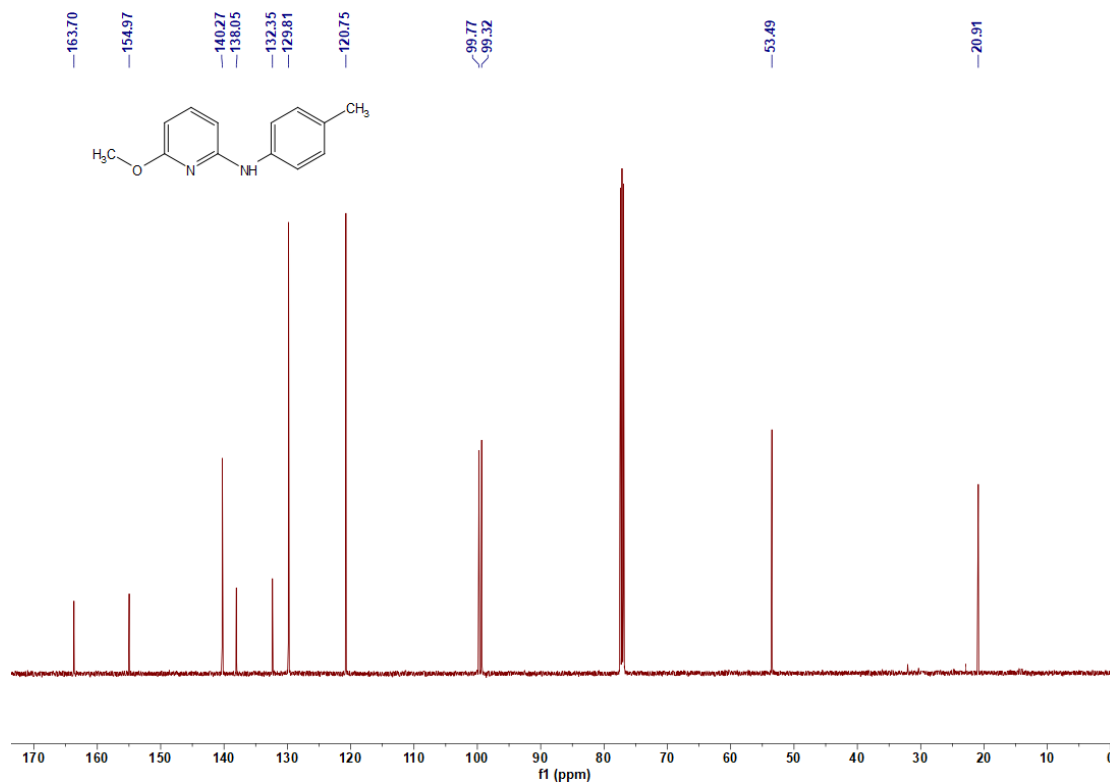

<sup>13</sup>C NMR spectrum of 6f

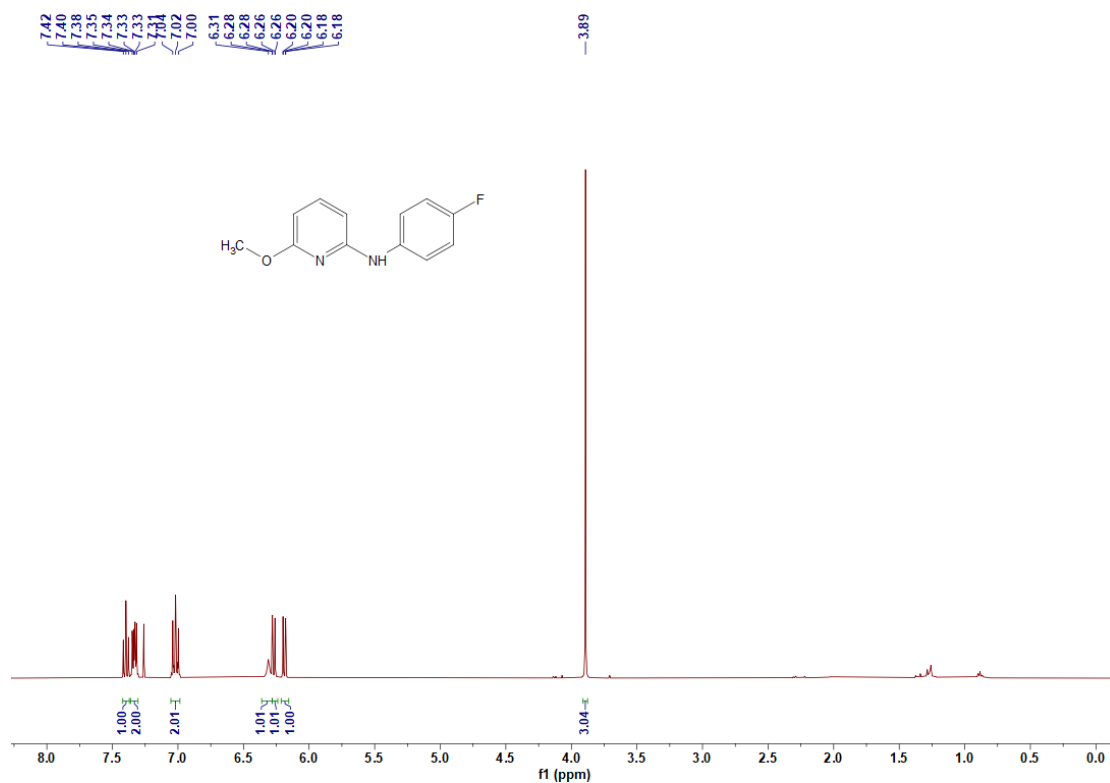

<sup>1</sup>H NMR spectrum of 6g

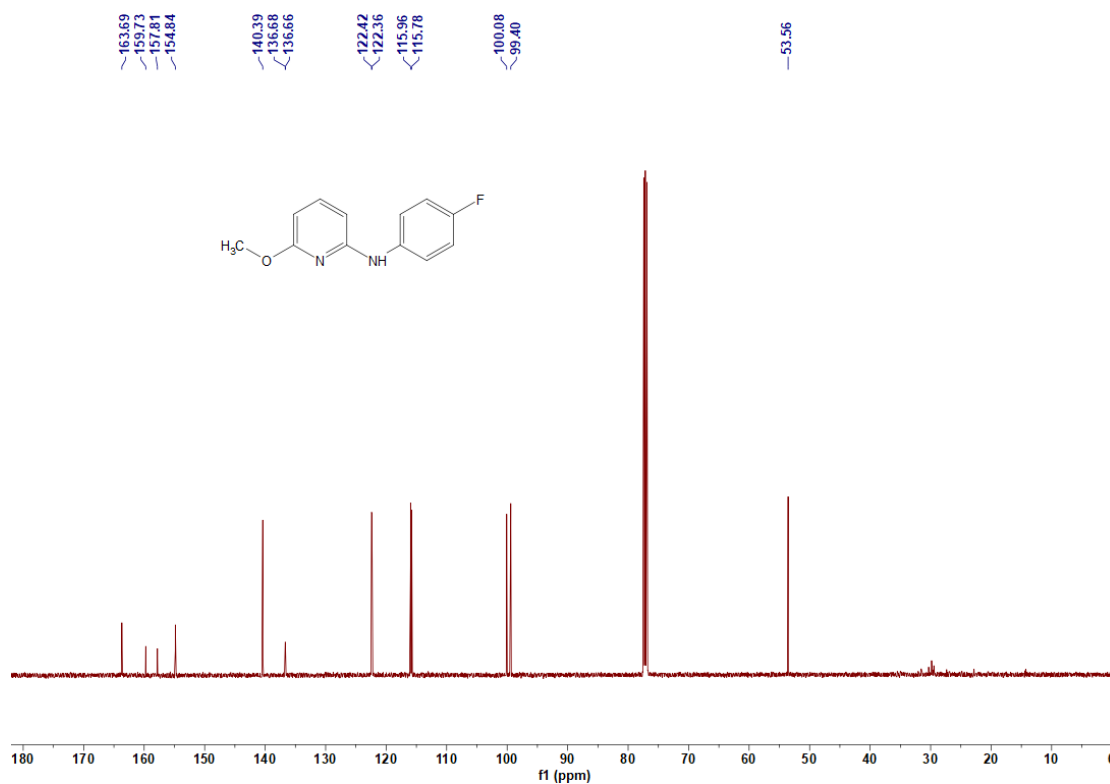

<sup>13</sup>C NMR spectrum of 6g

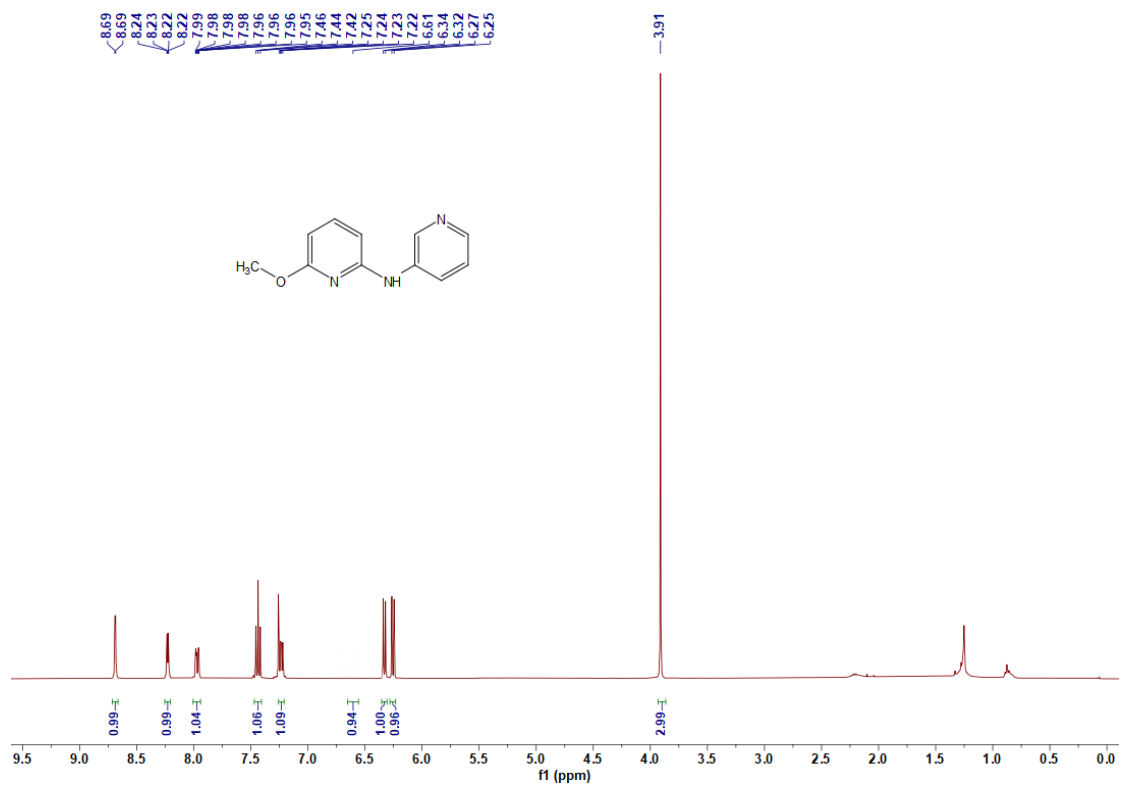

<sup>1</sup>H NMR spectrum of 6h

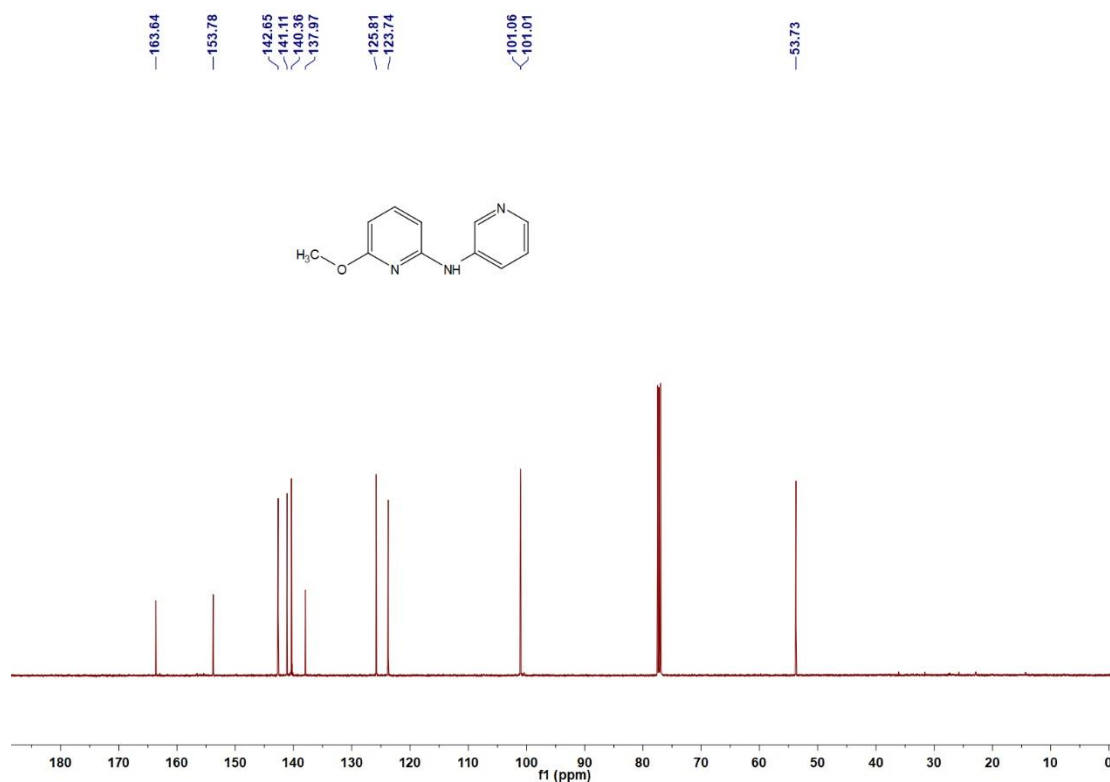

<sup>13</sup>C NMR spectrum of 6h

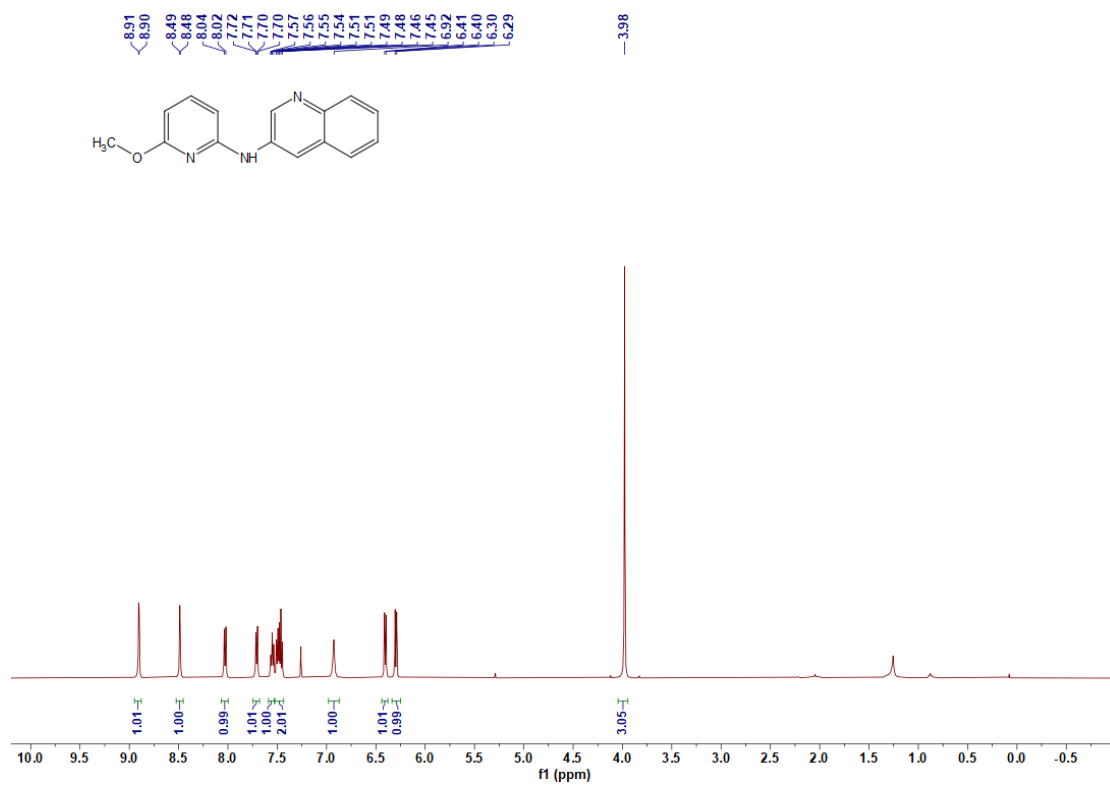

<sup>1</sup>H NMR spectrum of **6i**

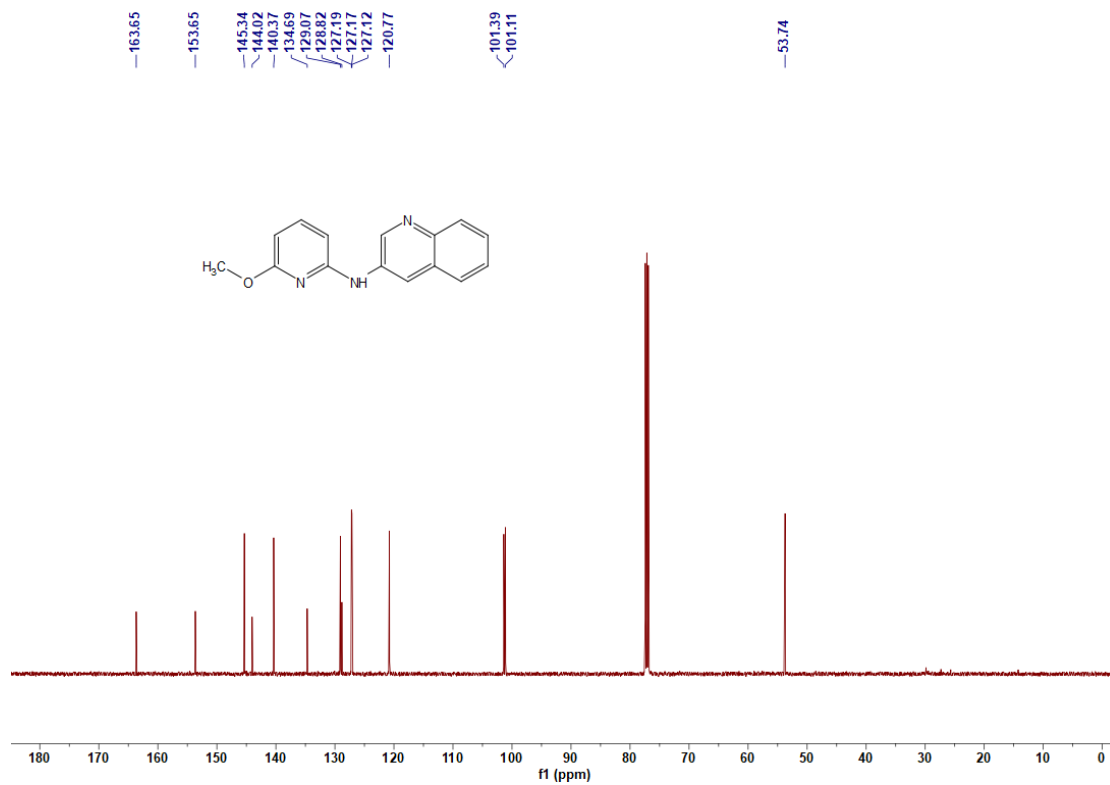

<sup>13</sup>C NMR spectrum of **6i**

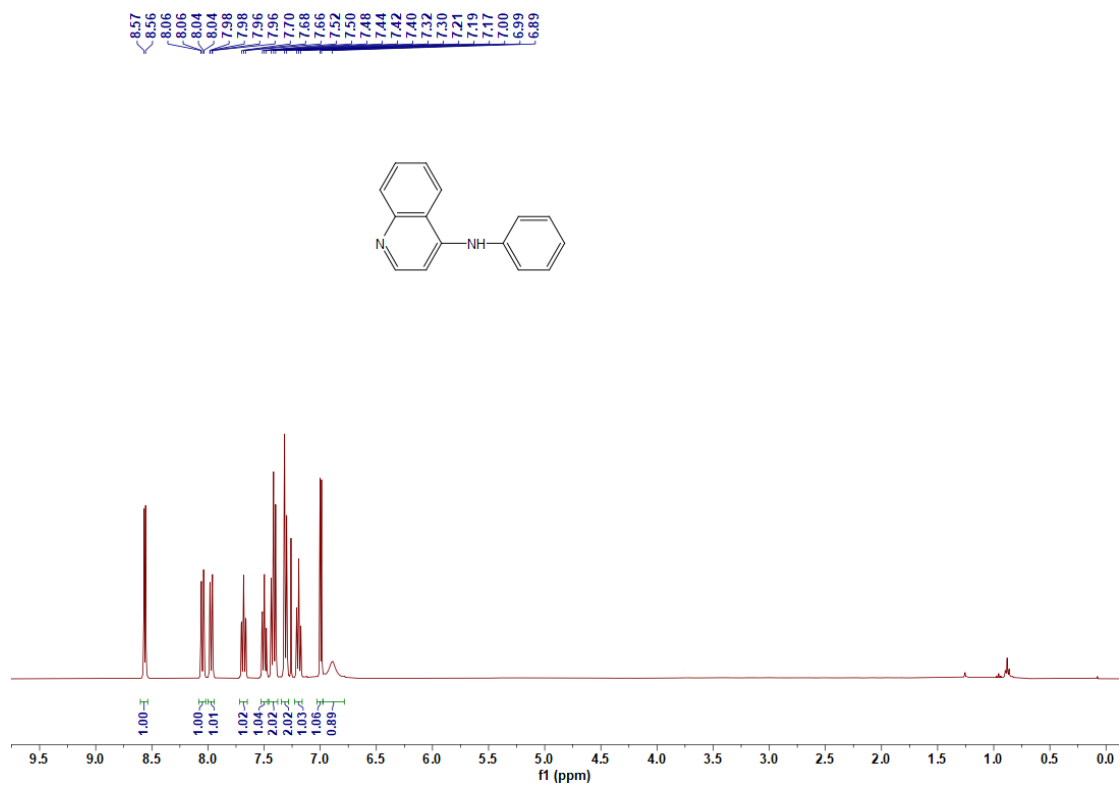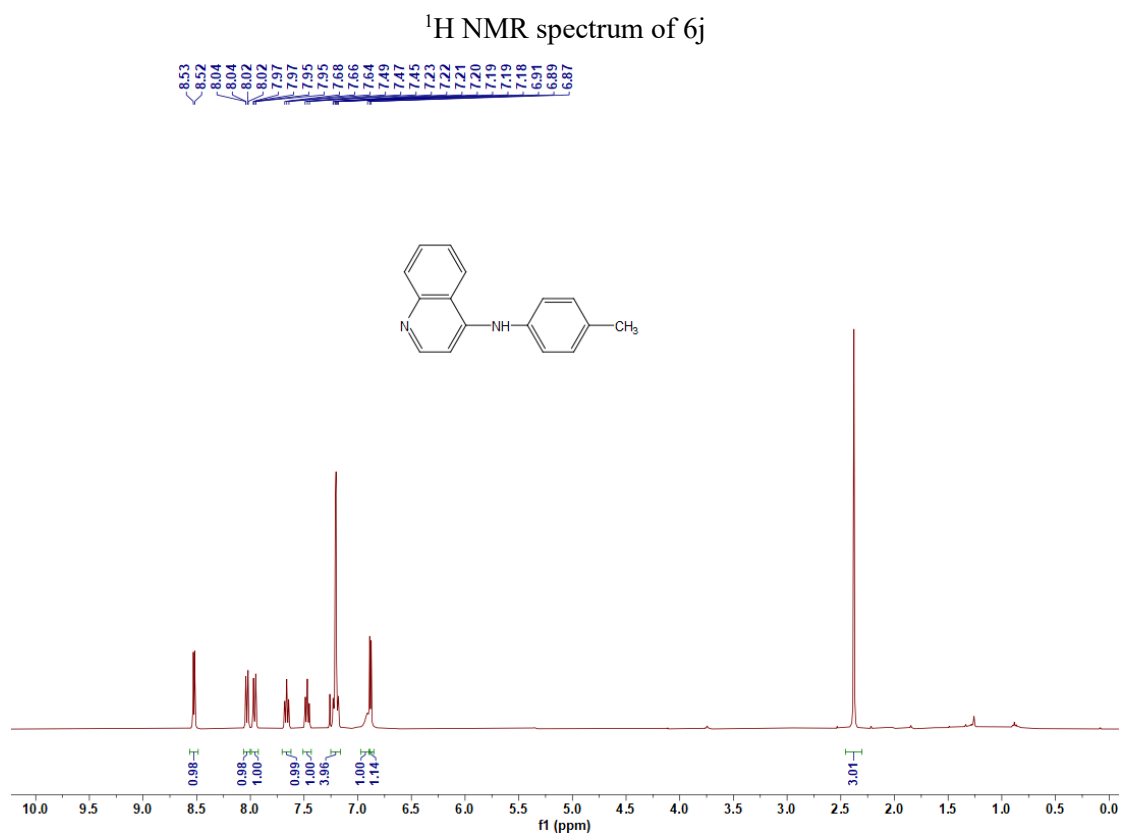

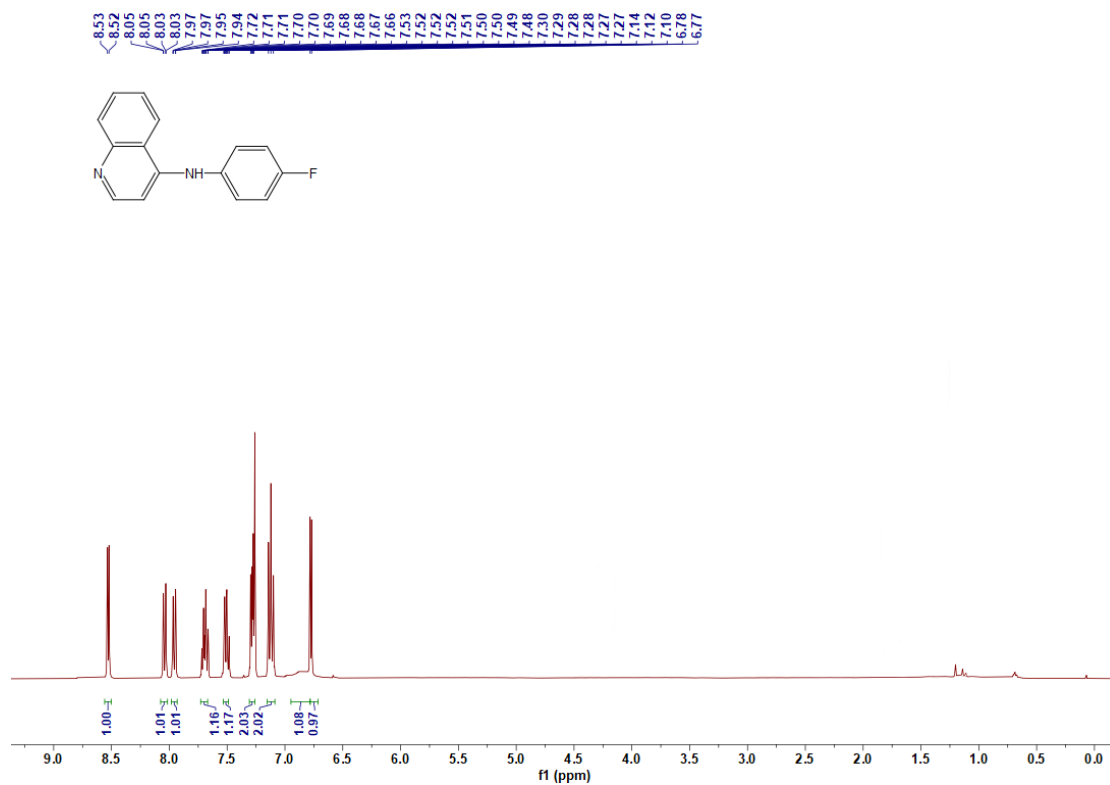

$^1\text{H}$  NMR spectrum of 6l

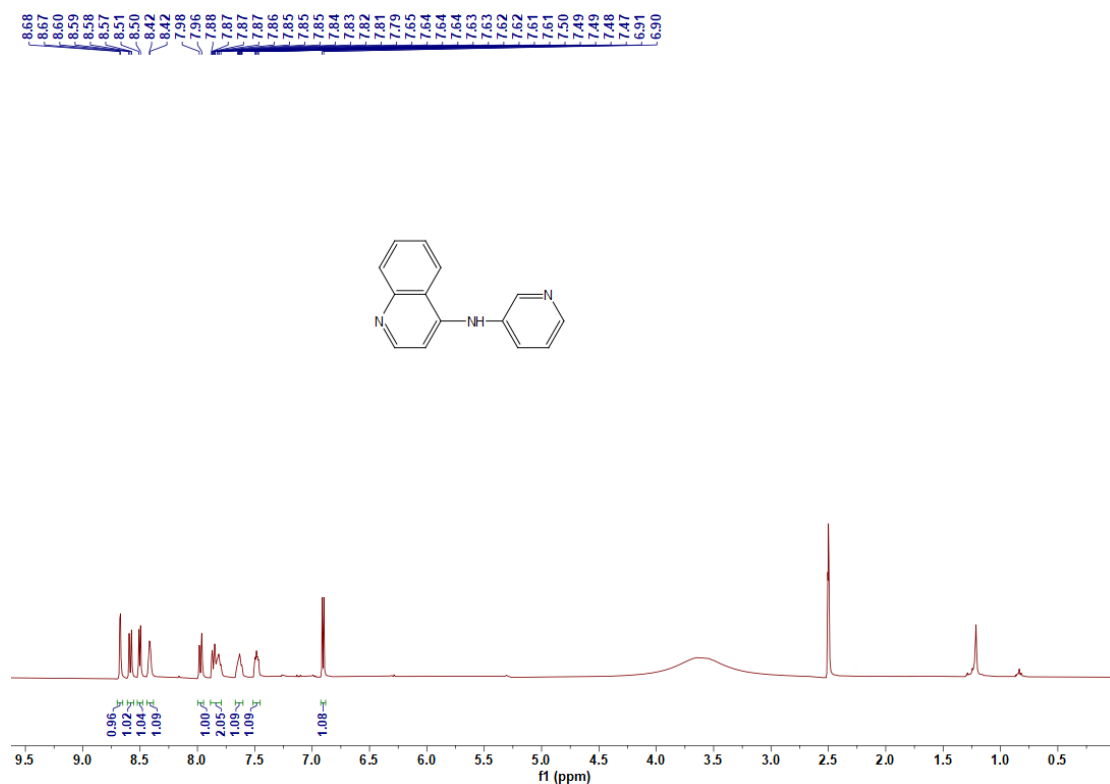

$^1\text{H}$  NMR spectrum of 6m

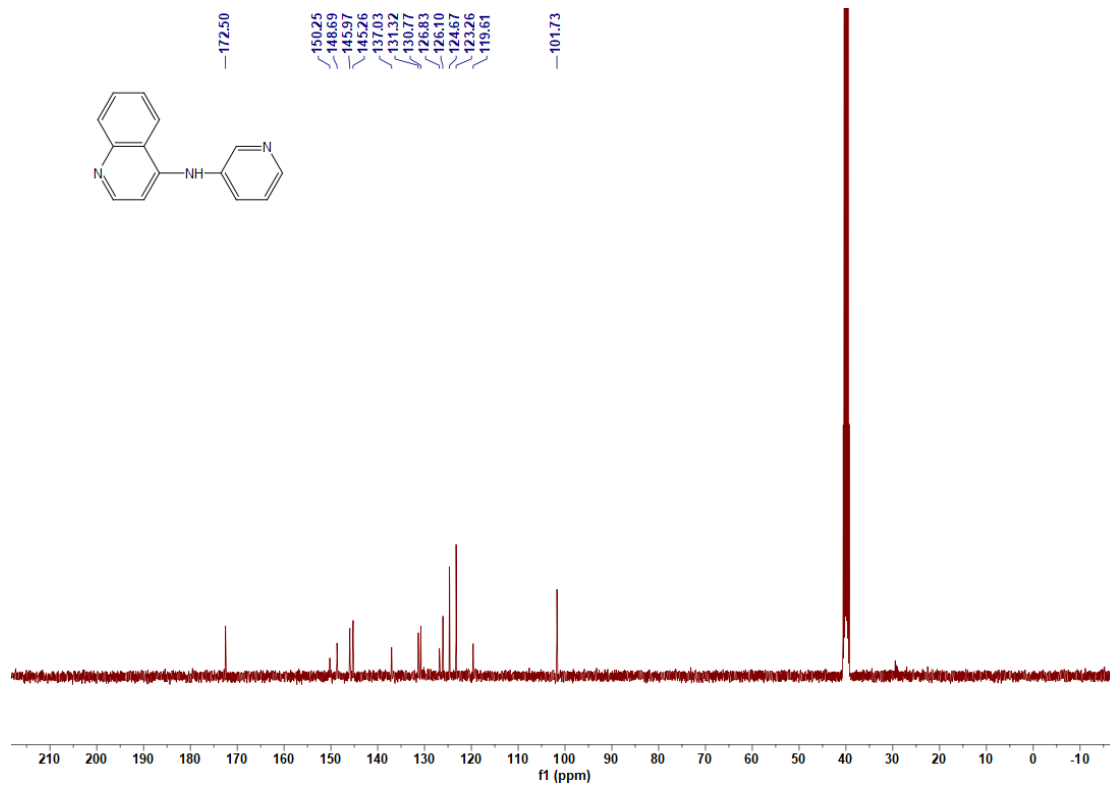

<sup>13</sup>C NMR spectrum of 6m

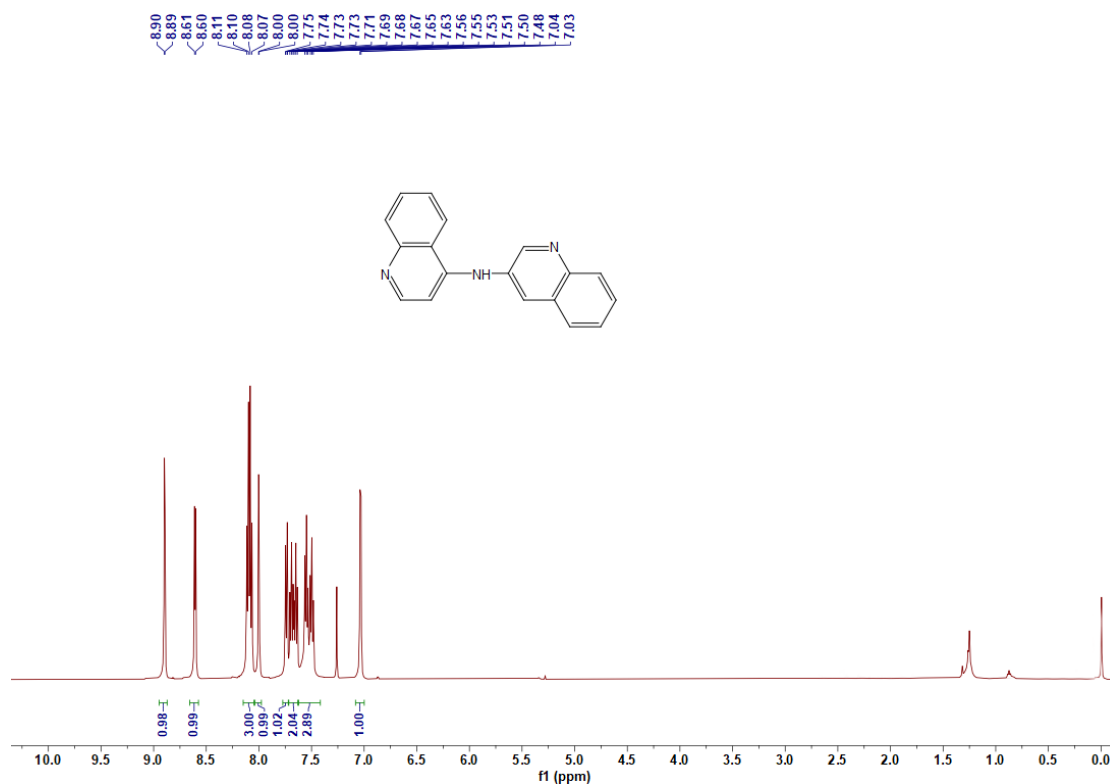

<sup>1</sup>H NMR spectrum of 6n

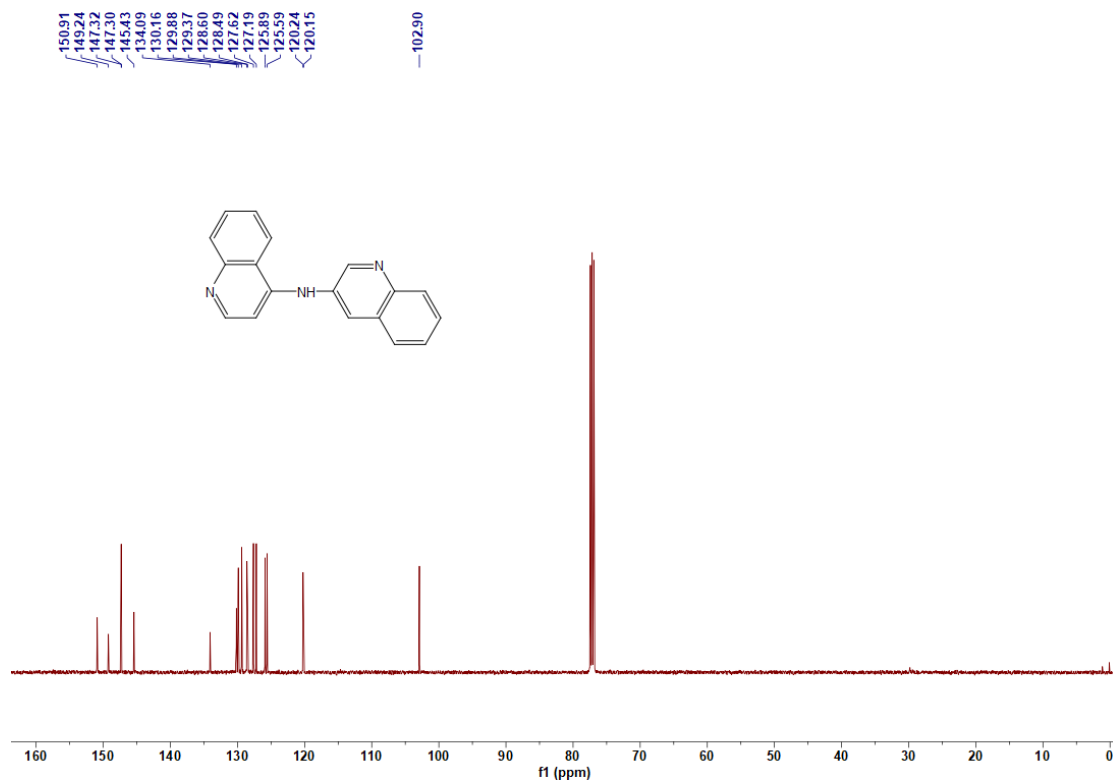

<sup>13</sup>C NMR spectrum of 6n

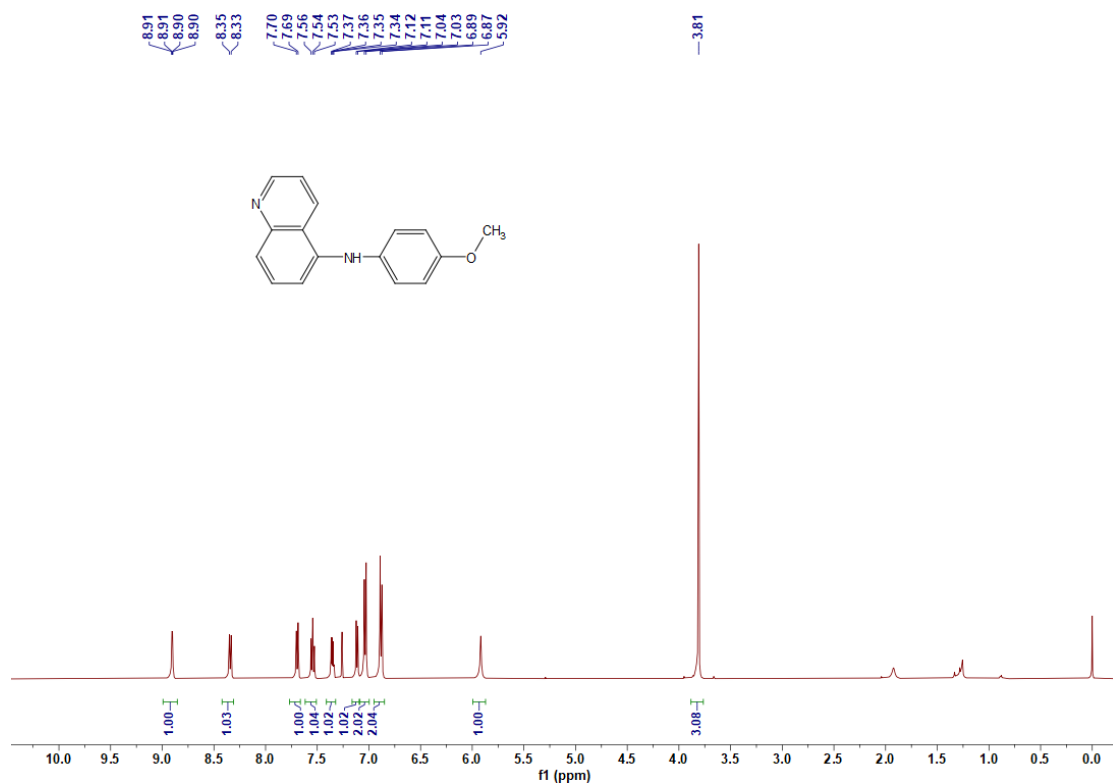

<sup>1</sup>H NMR spectrum of 6o

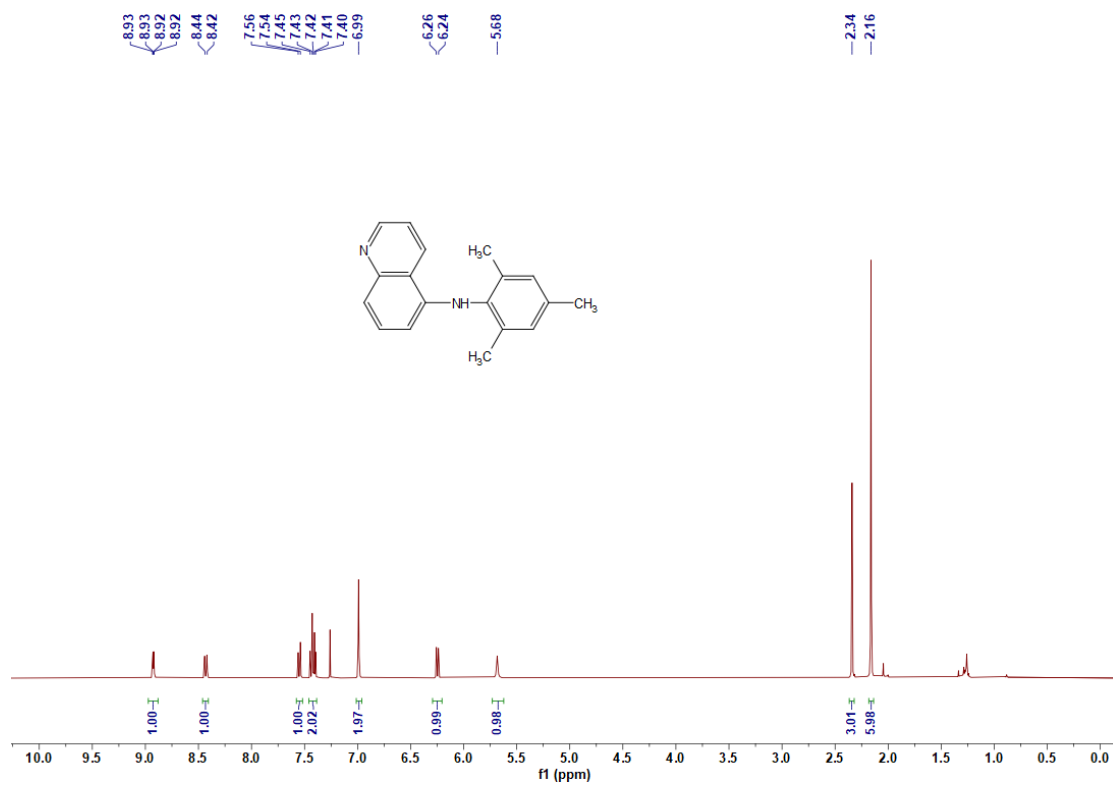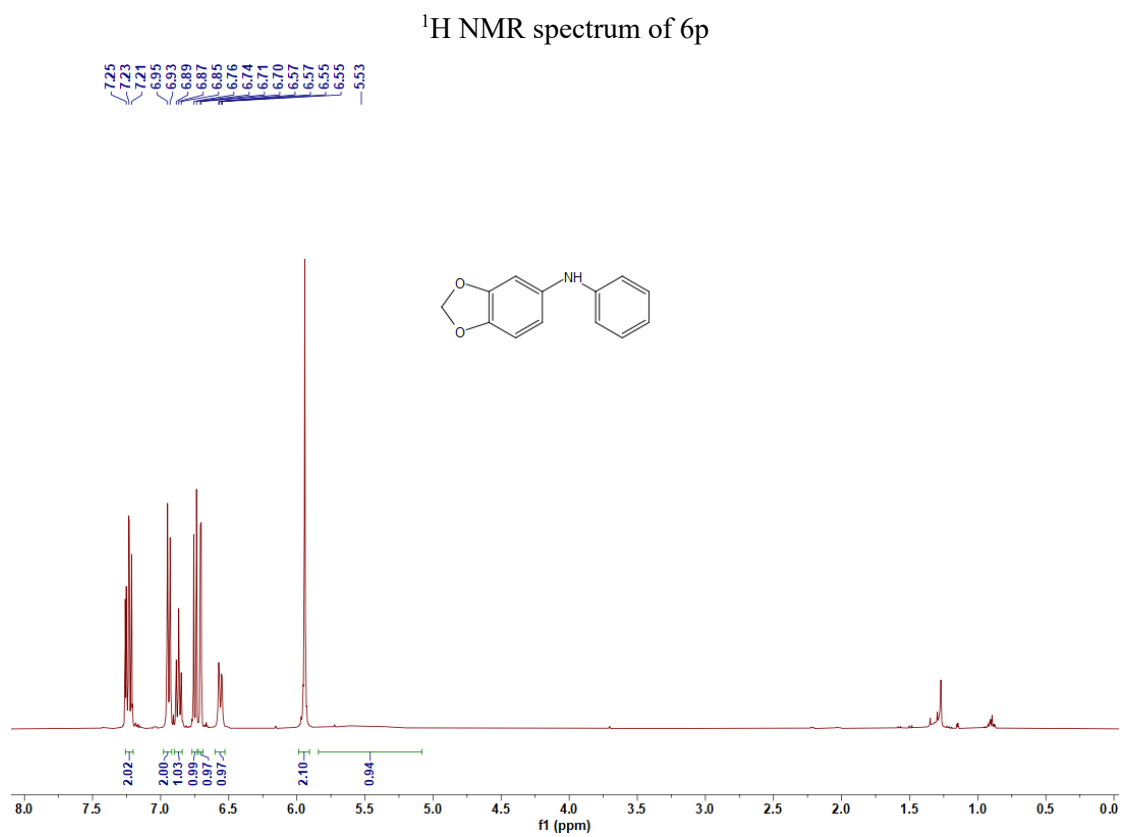

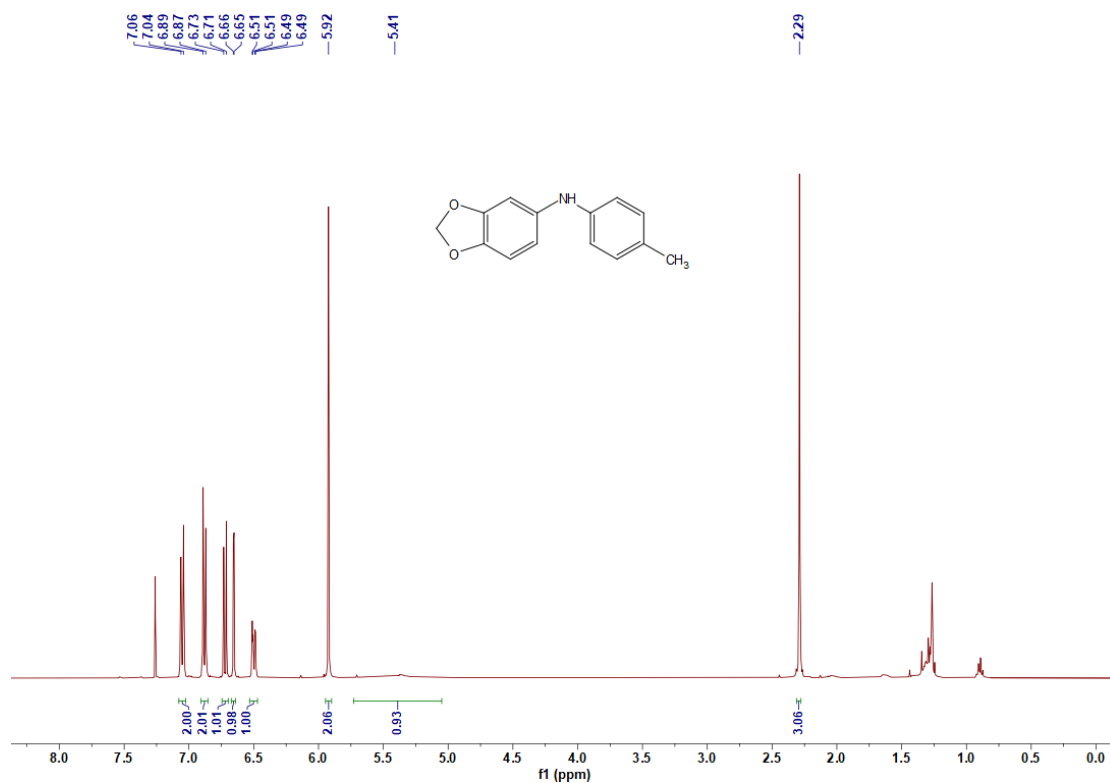

<sup>1</sup>H NMR spectrum of 6r

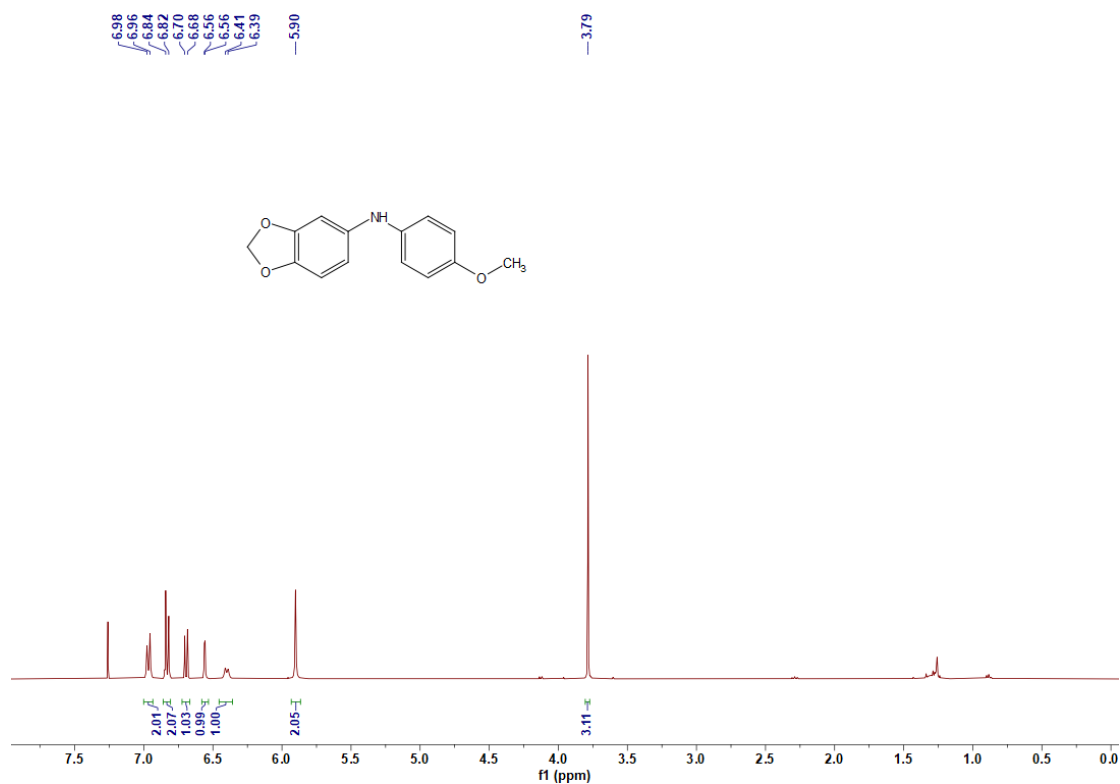

<sup>1</sup>H NMR spectrum of 6s

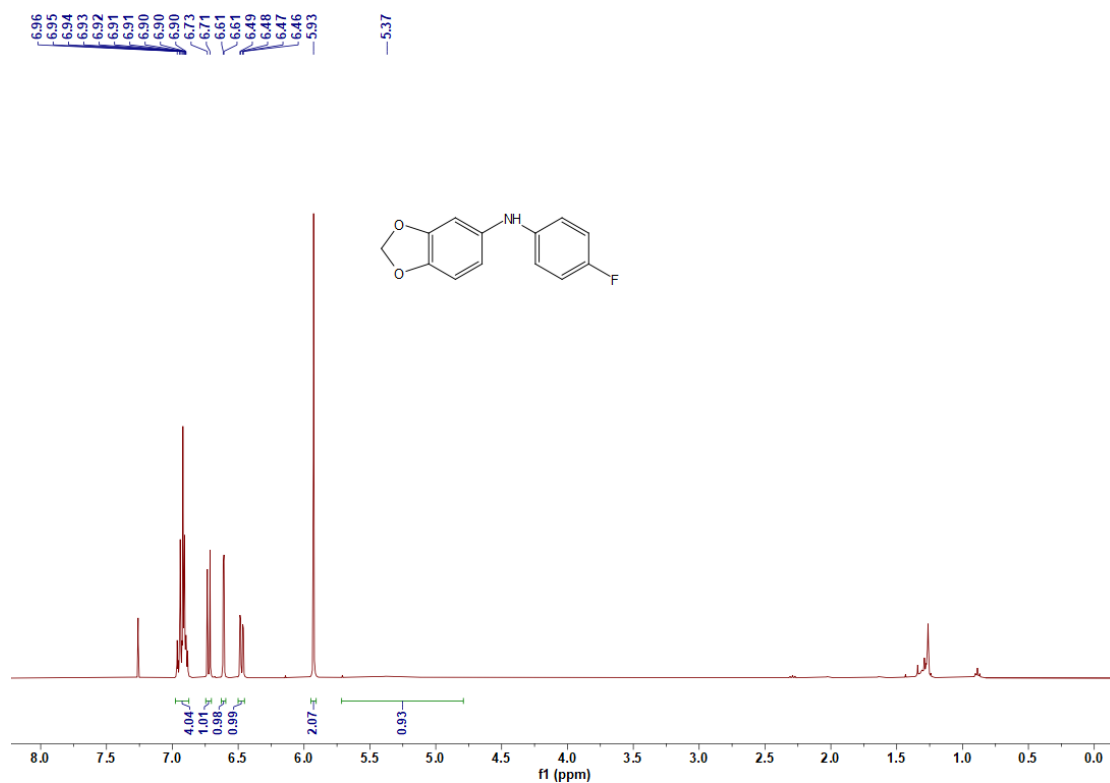

$^1\text{H}$  NMR spectrum of 6t

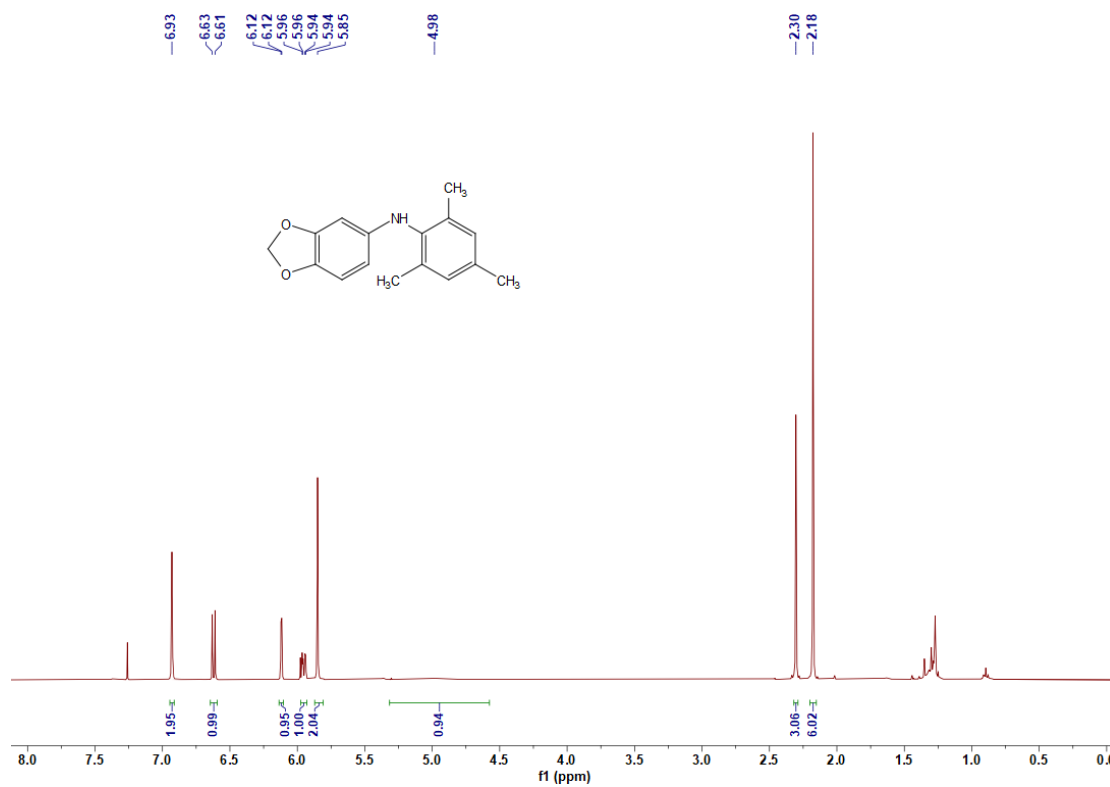

$^1\text{H}$  NMR spectrum of 6u

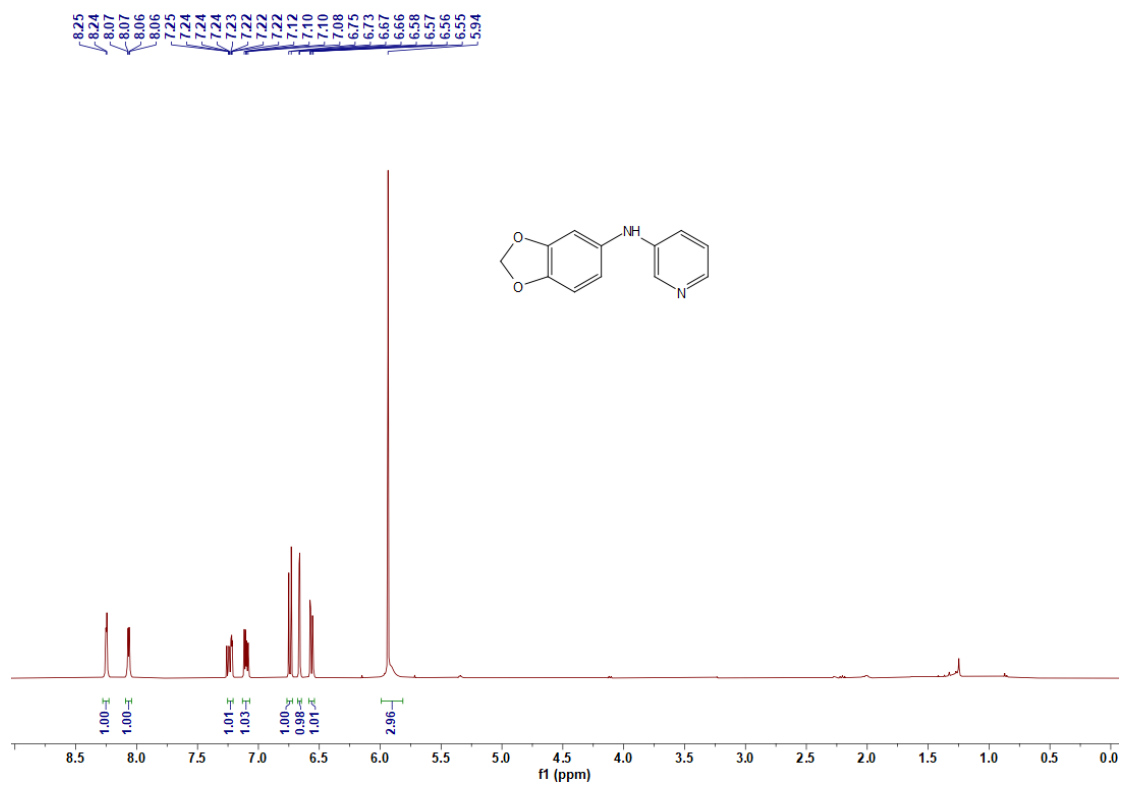

$^1\text{H}$  NMR spectrum of 6v

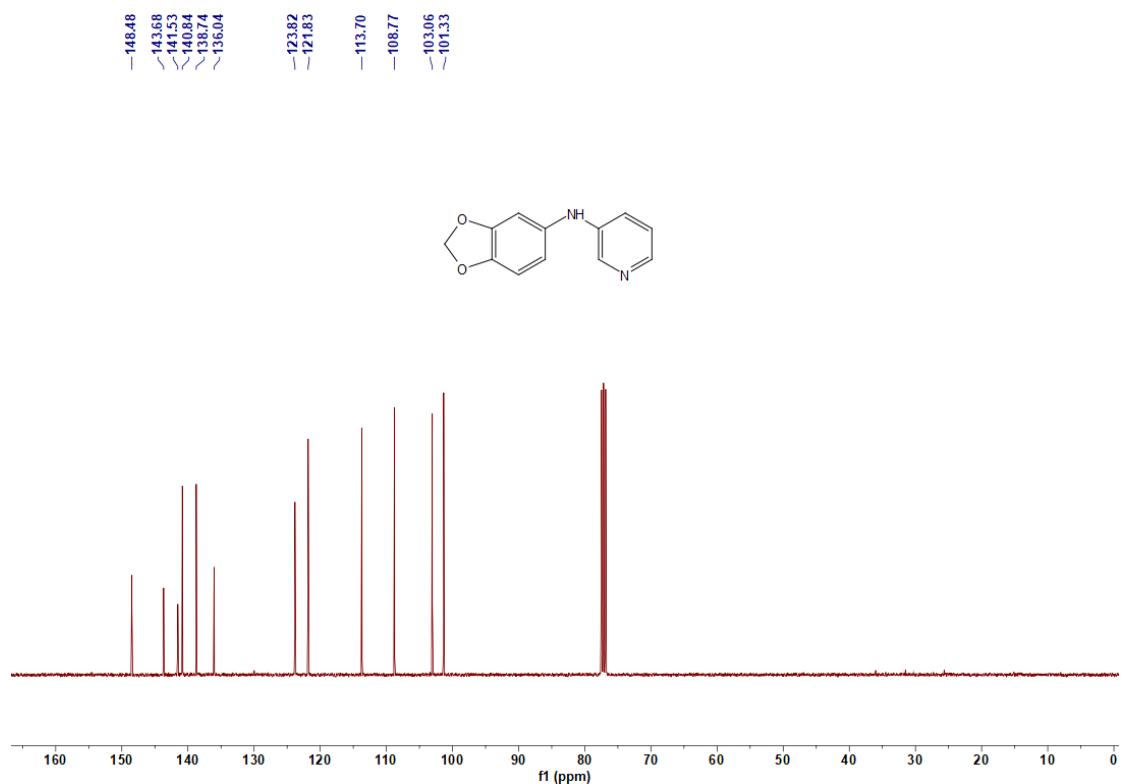

$^{13}\text{C}$  NMR spectrum of 6v

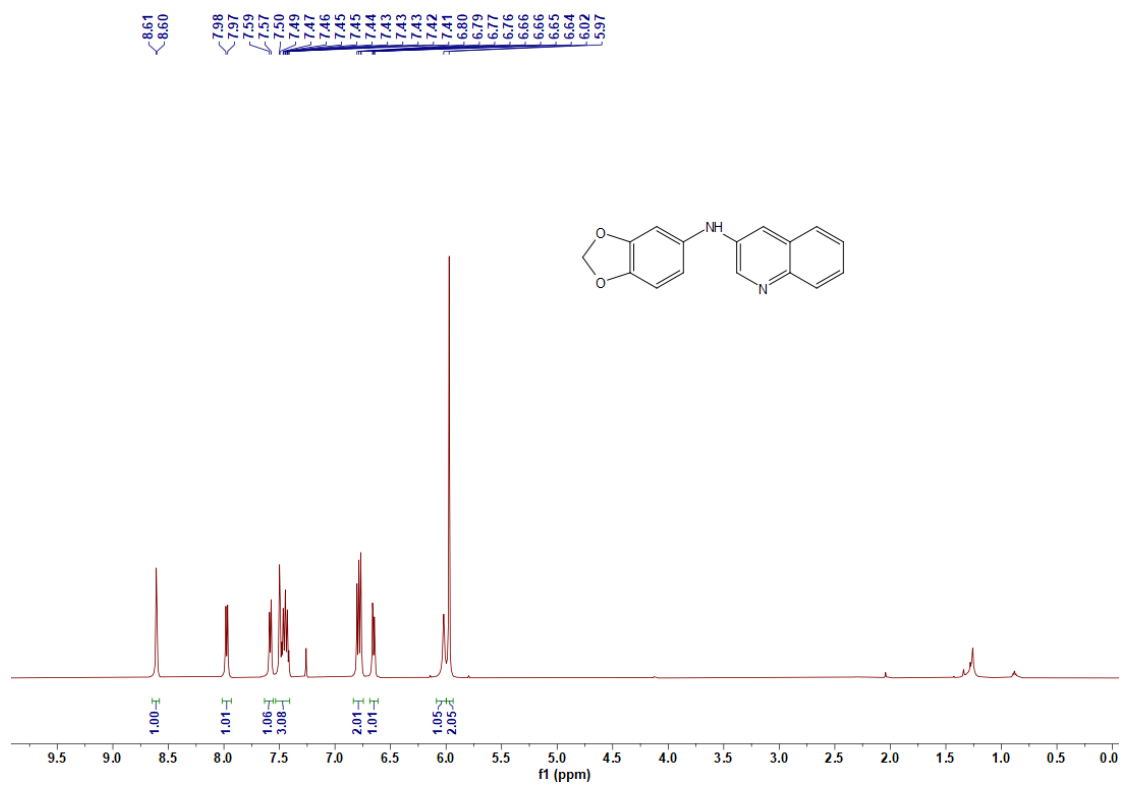

<sup>1</sup>H NMR spectrum of 6w

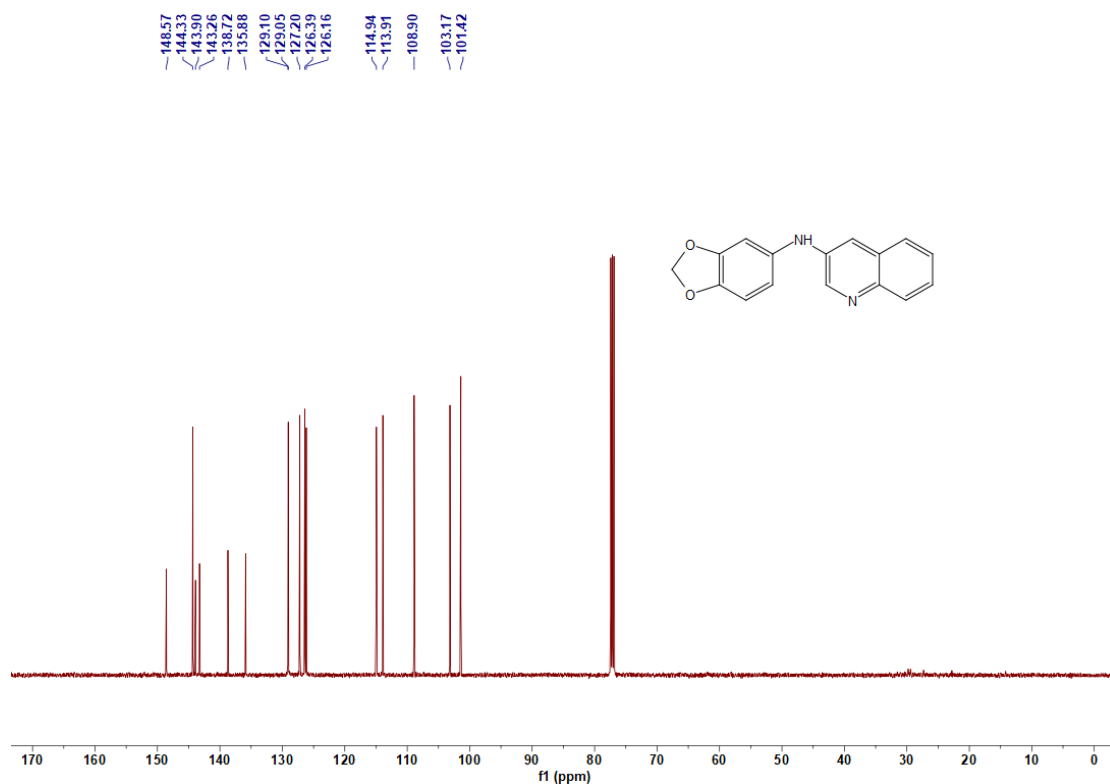

<sup>13</sup>C NMR spectrum of 6w

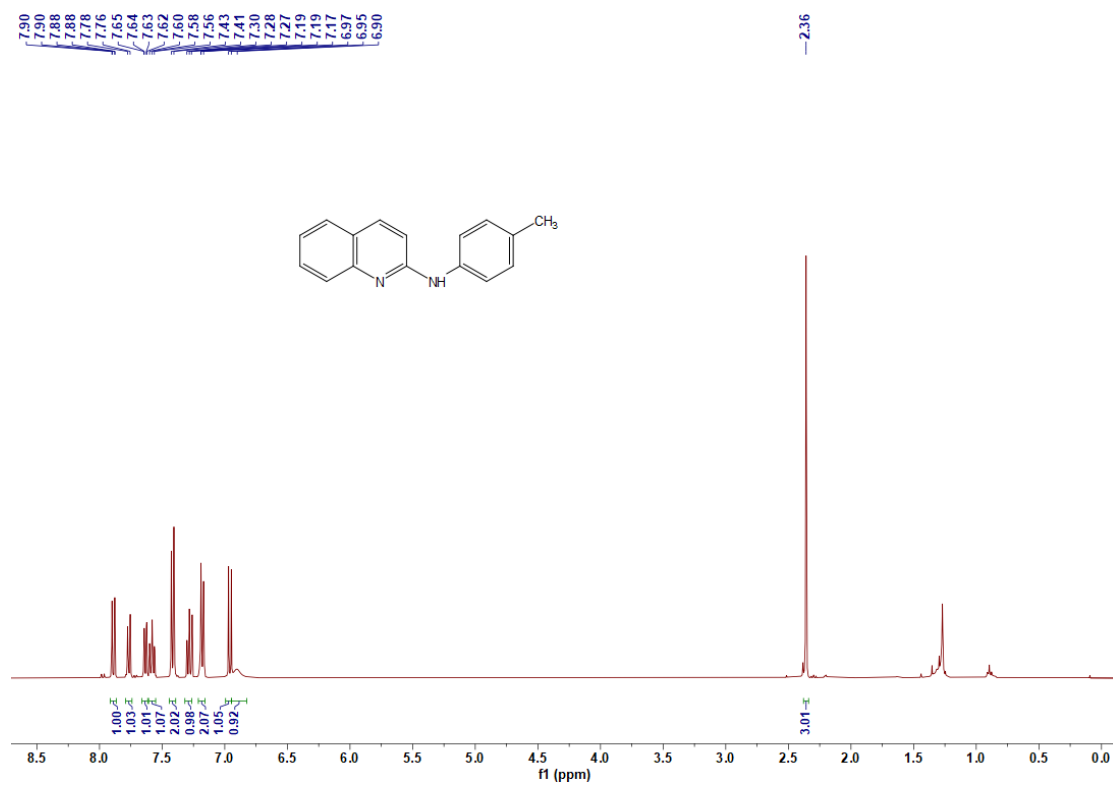

<sup>1</sup>H NMR spectrum of 6x

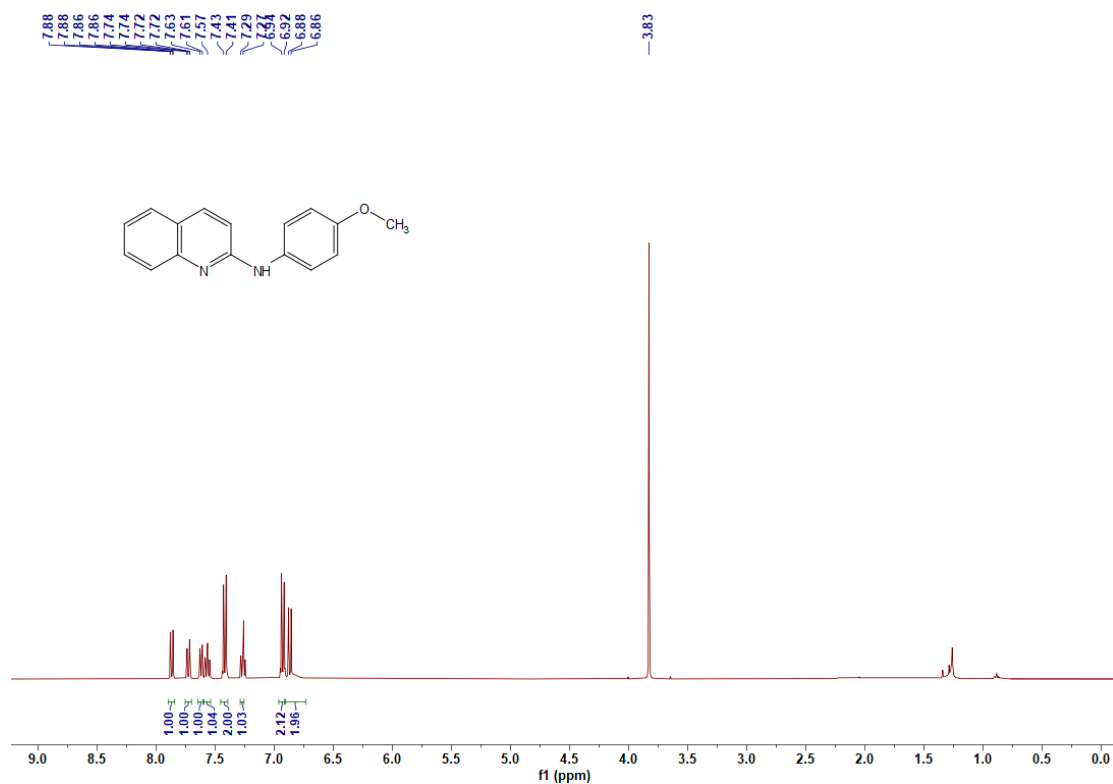

<sup>1</sup>H NMR spectrum of 6y

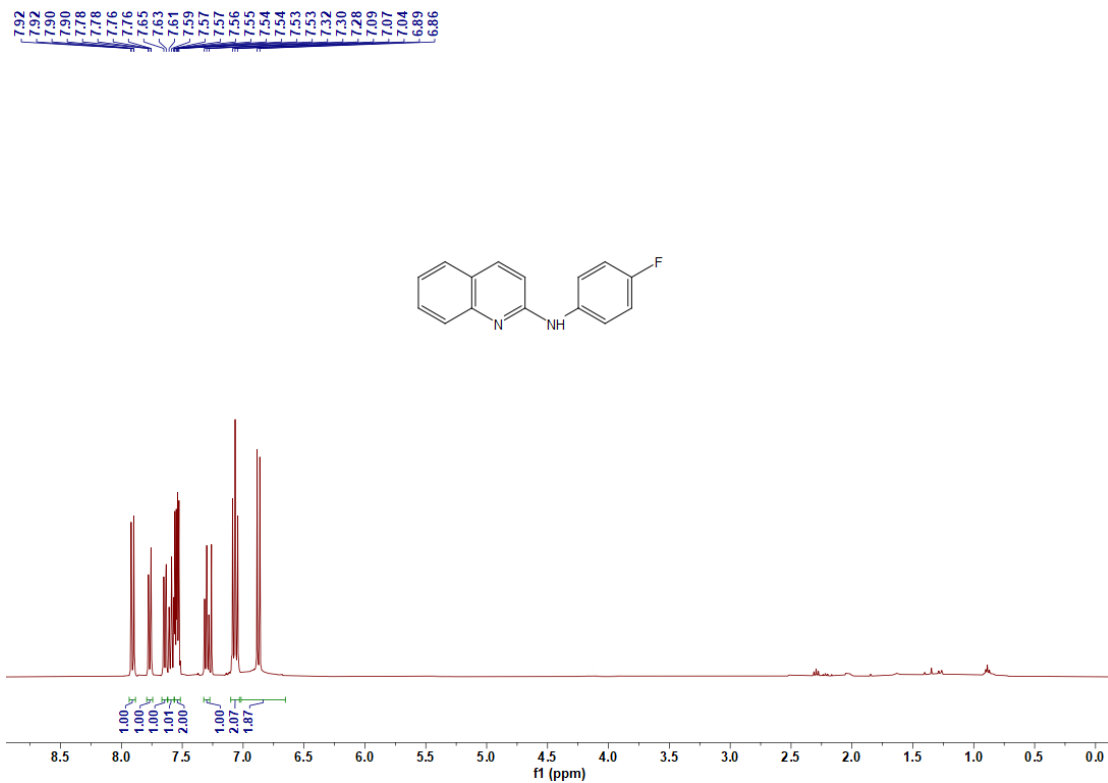

<sup>1</sup>H NMR spectrum of 6z

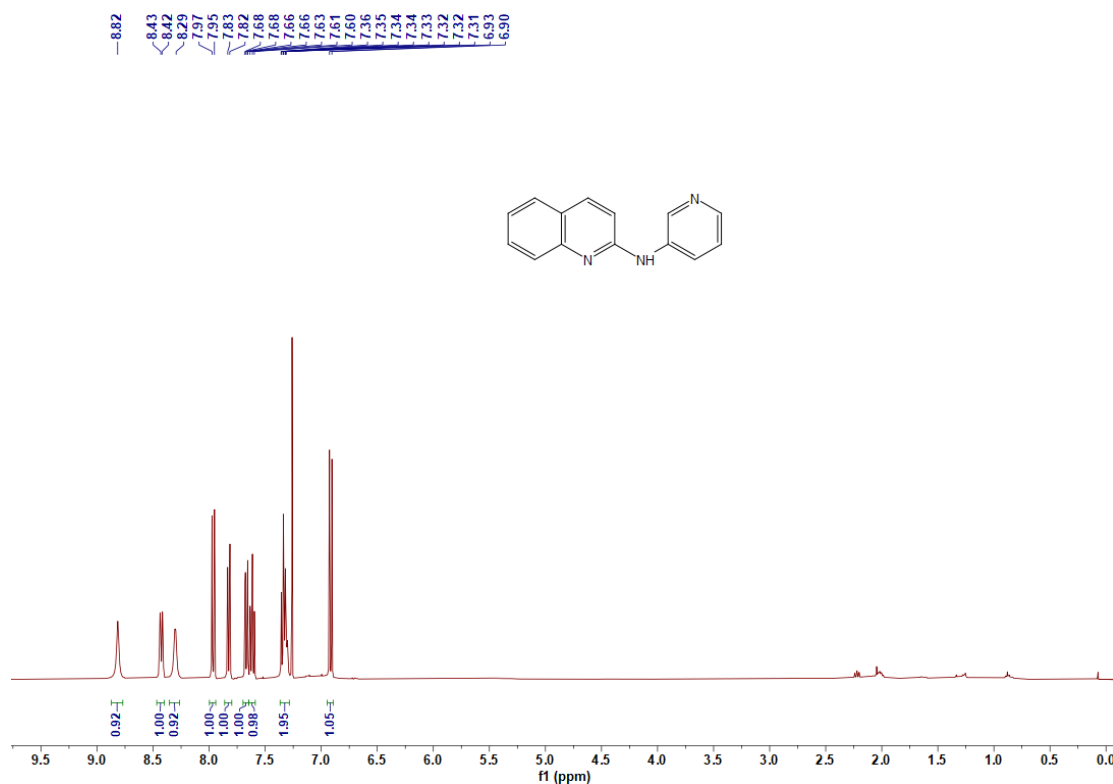

<sup>1</sup>H NMR spectrum of 6aa

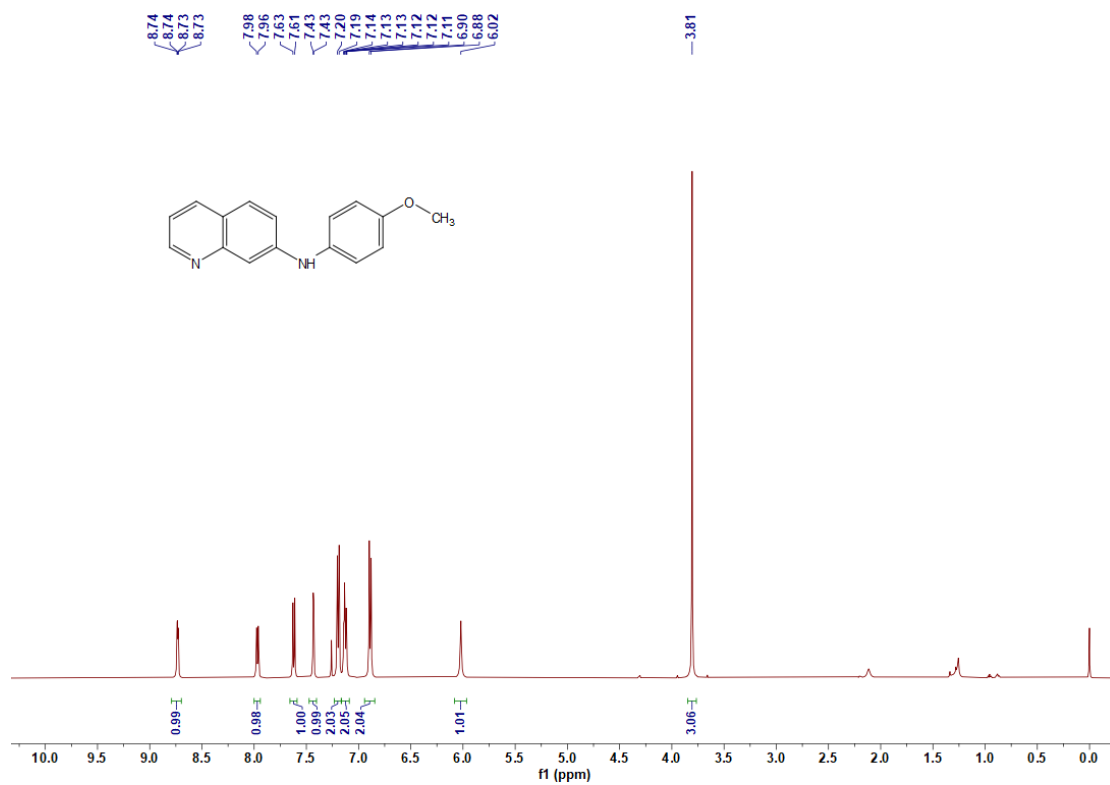

<sup>1</sup>H NMR spectrum of 6a

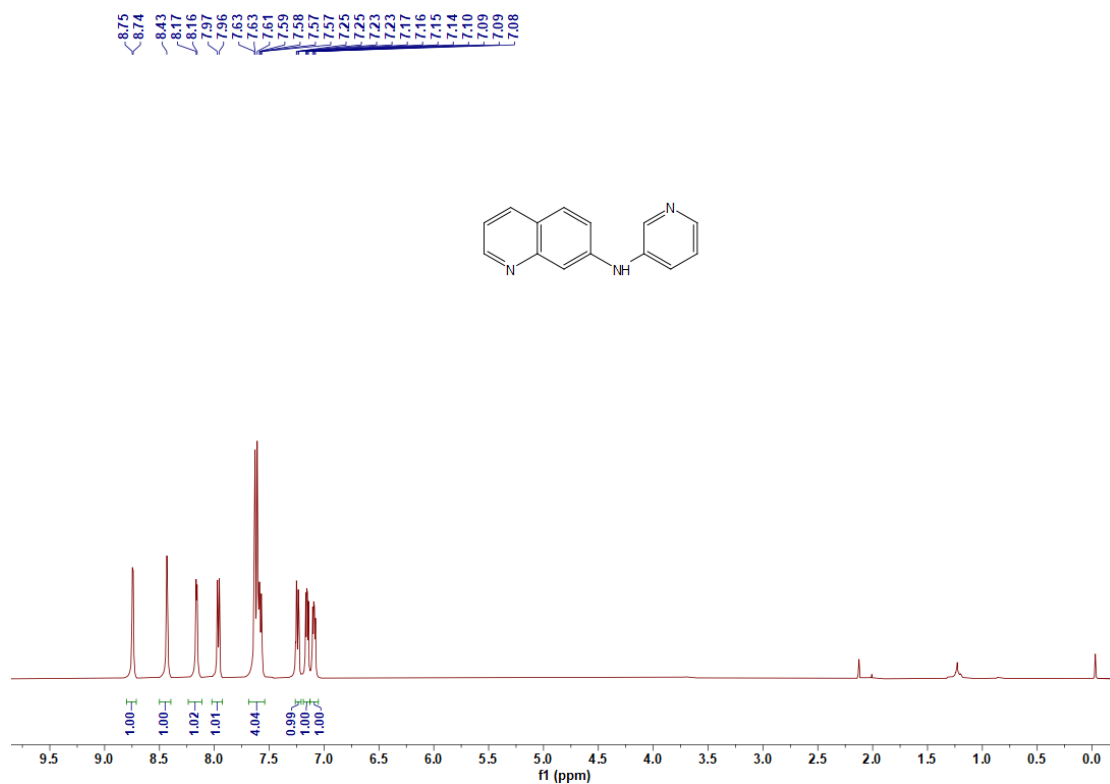

<sup>1</sup>H NMR spectrum of 6ac

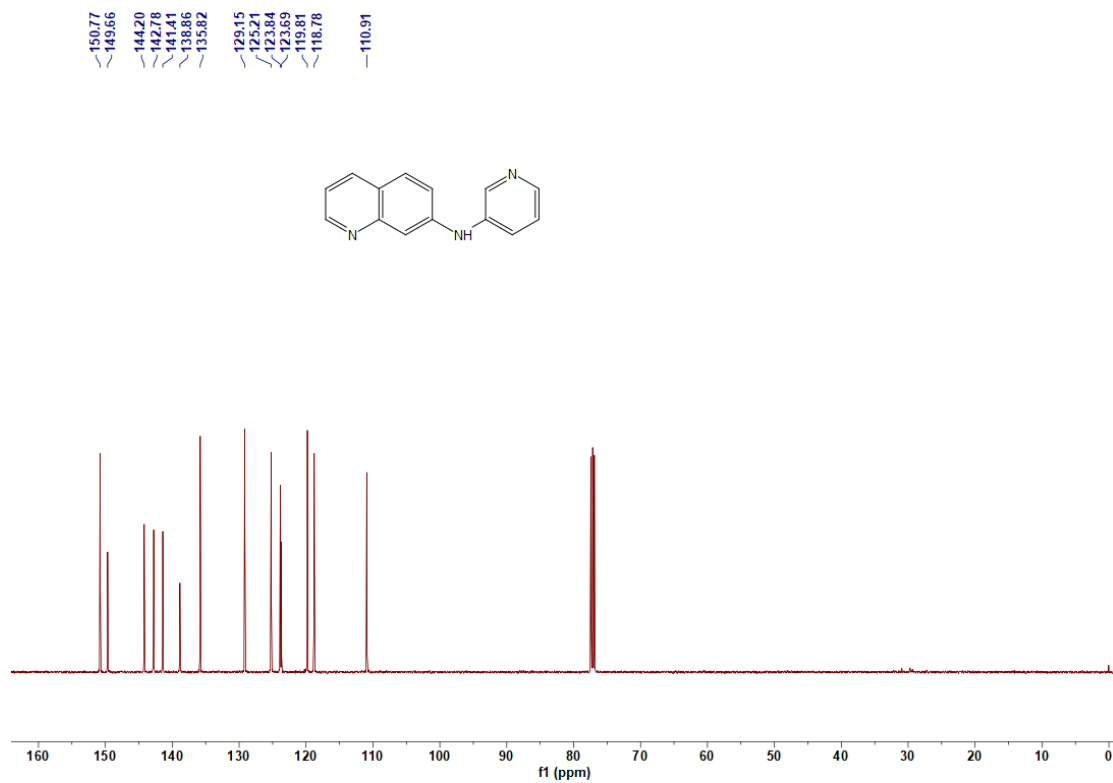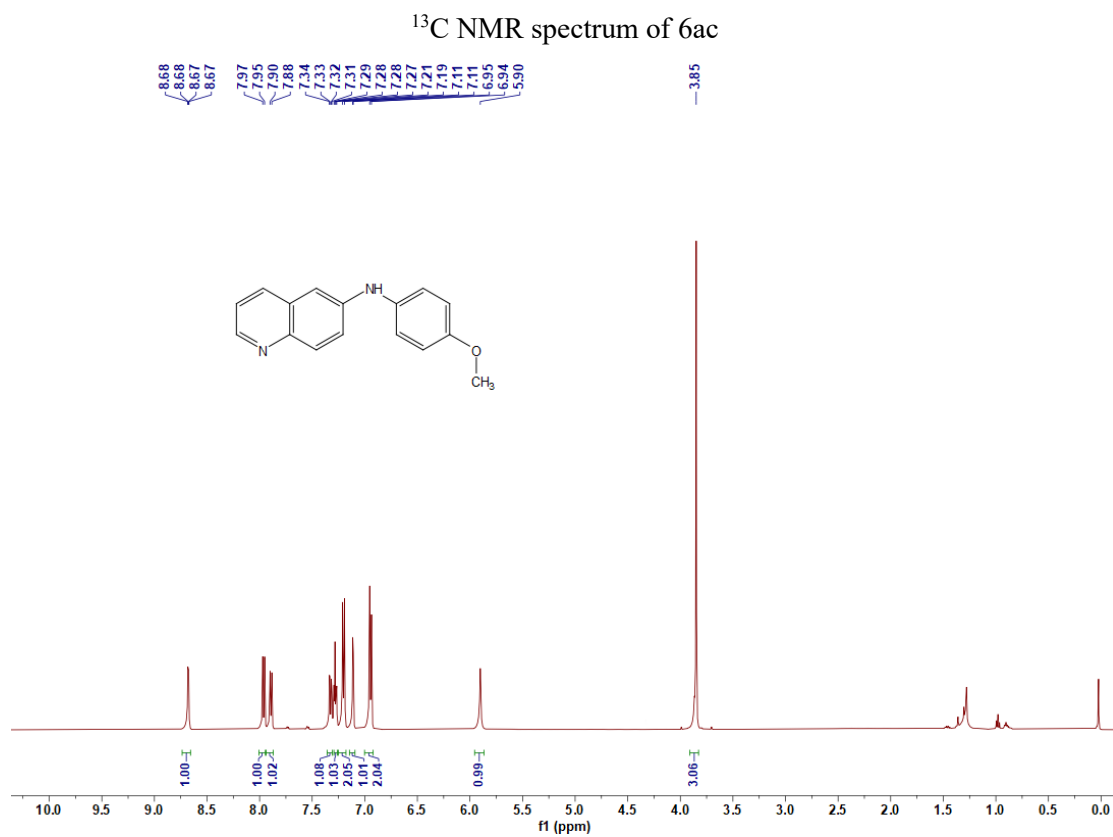

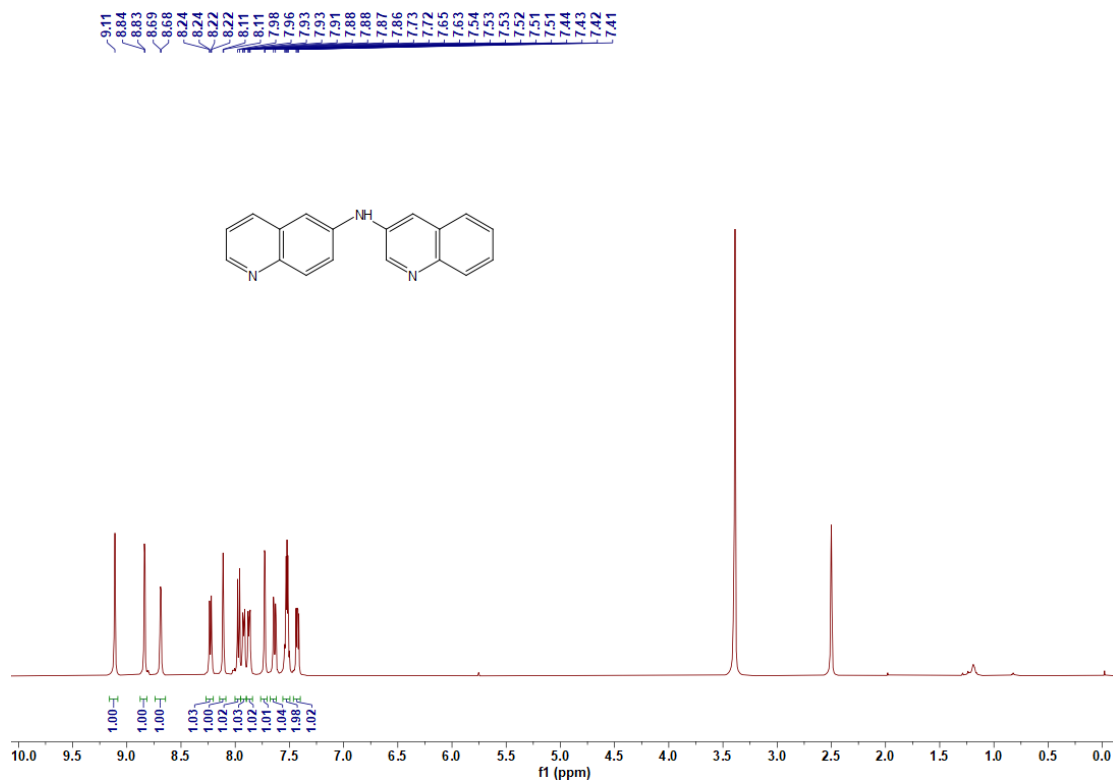

<sup>1</sup>H NMR spectrum of 6ae

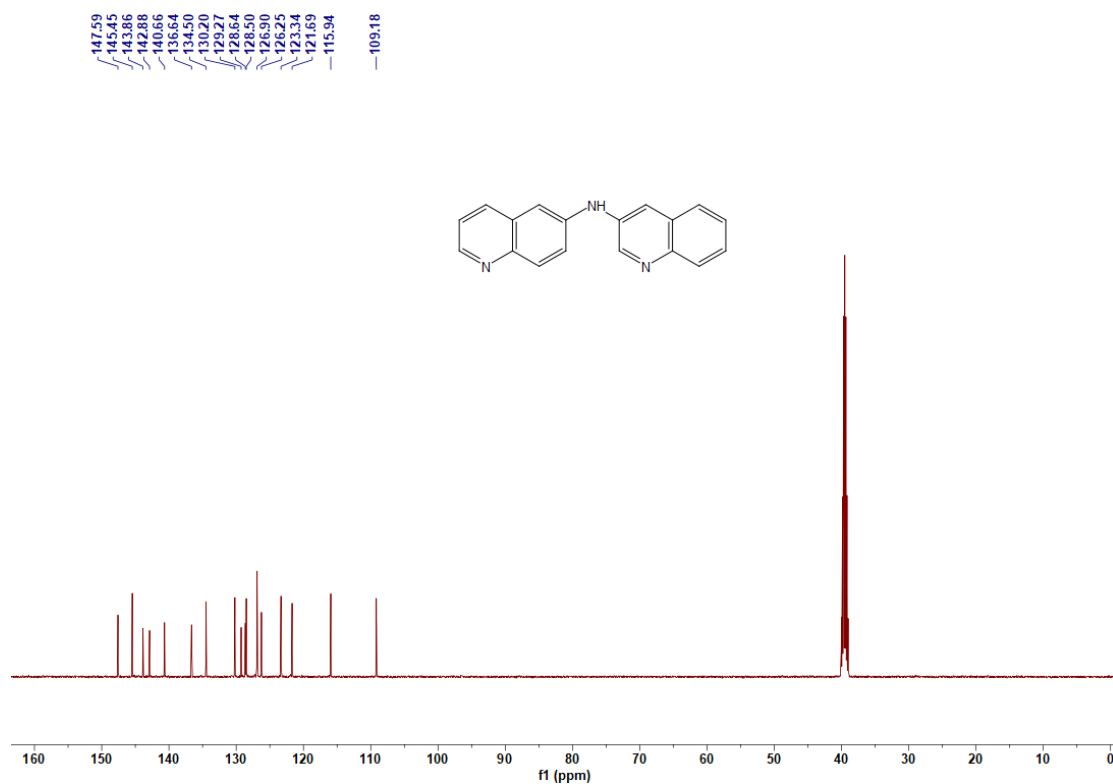

<sup>13</sup>C NMR spectrum of 6ae

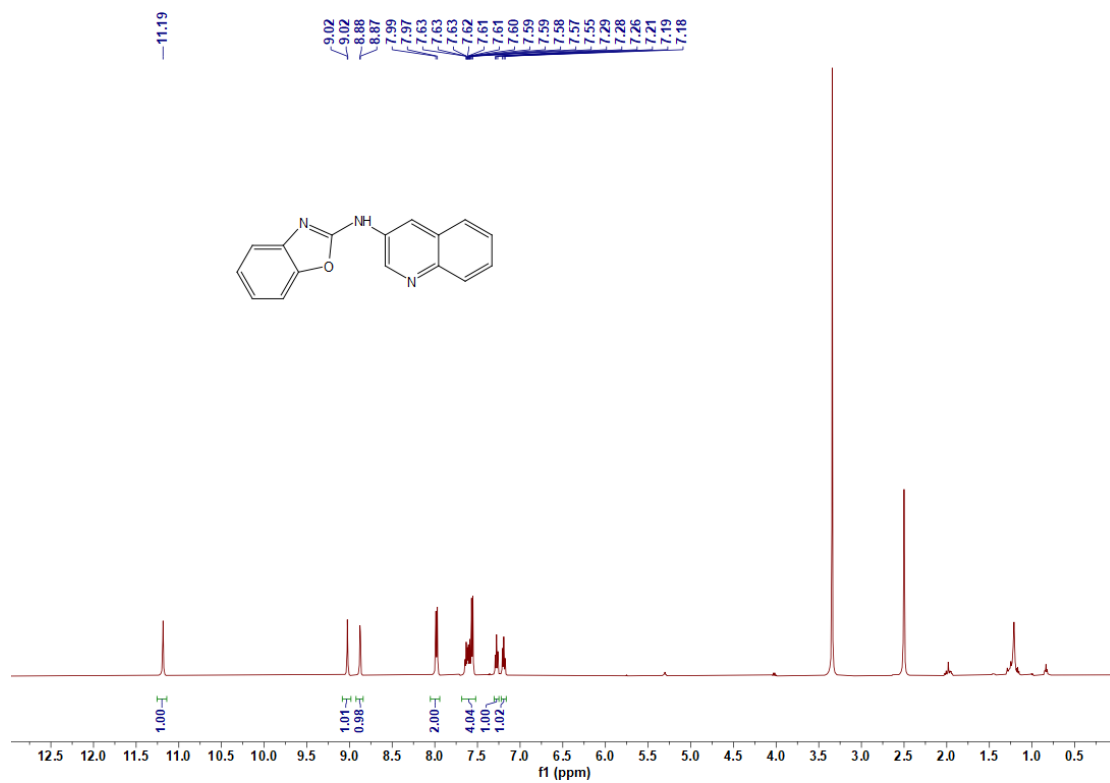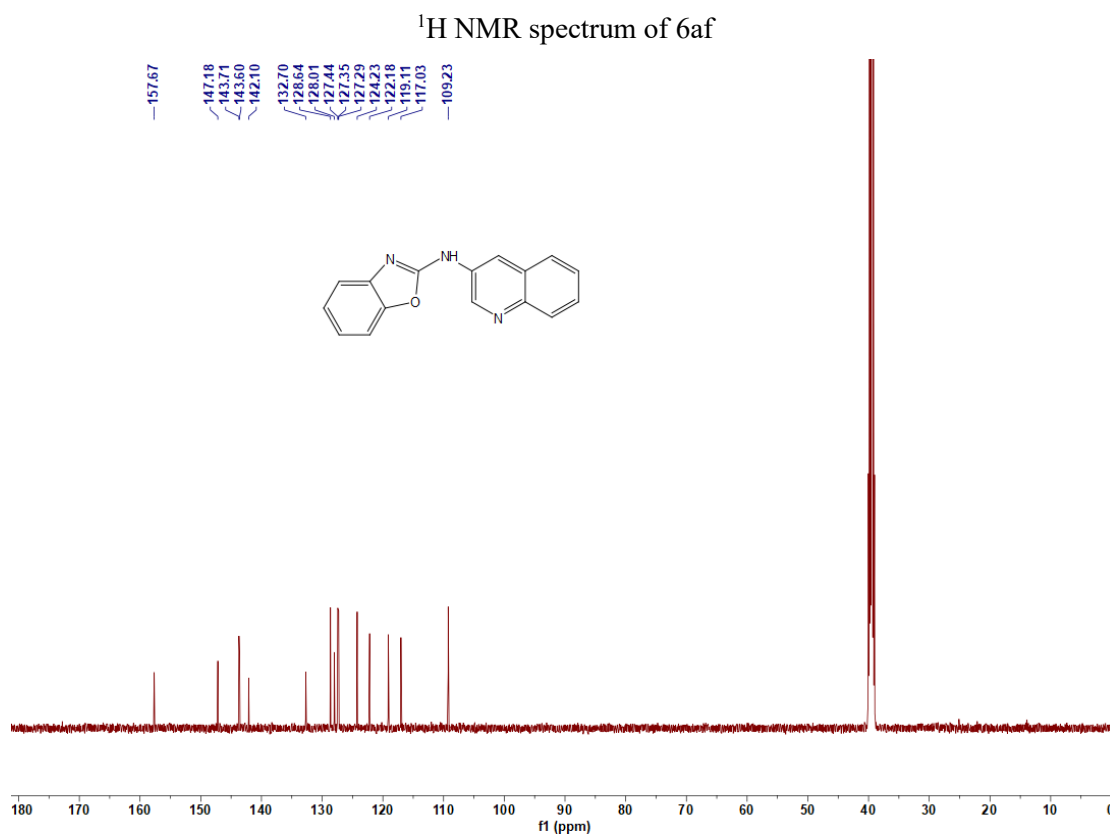

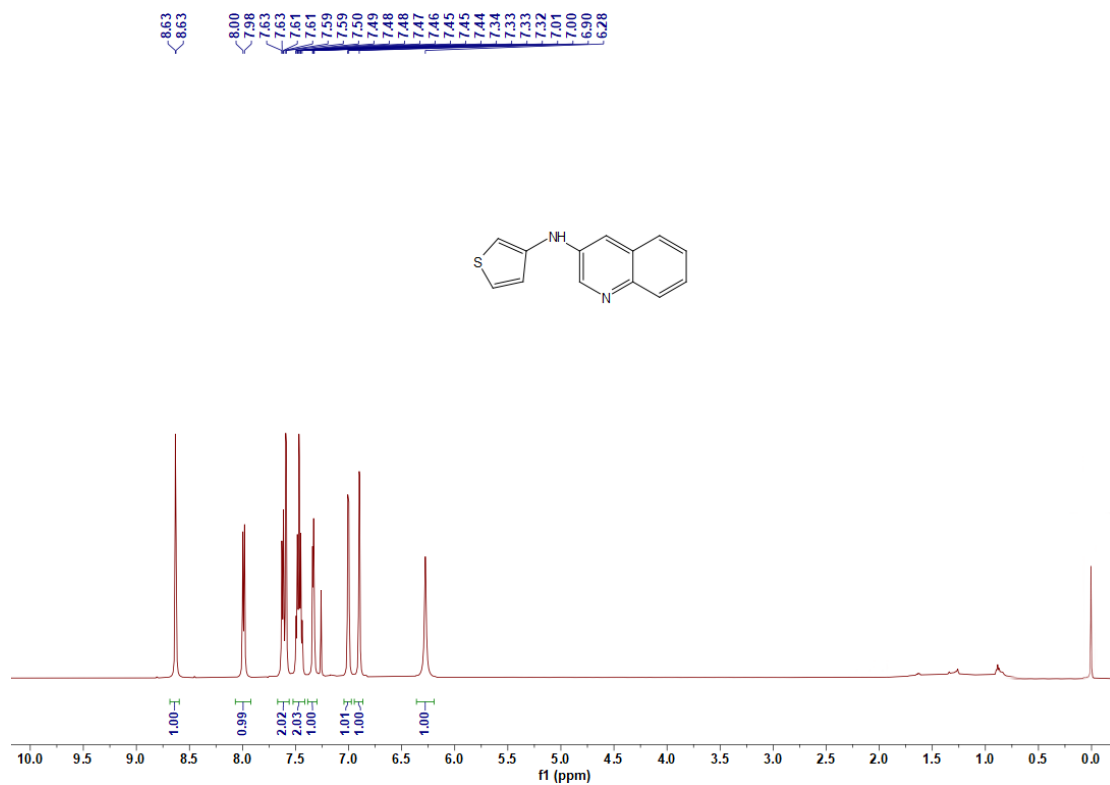

<sup>1</sup>H NMR spectrum of 6ag

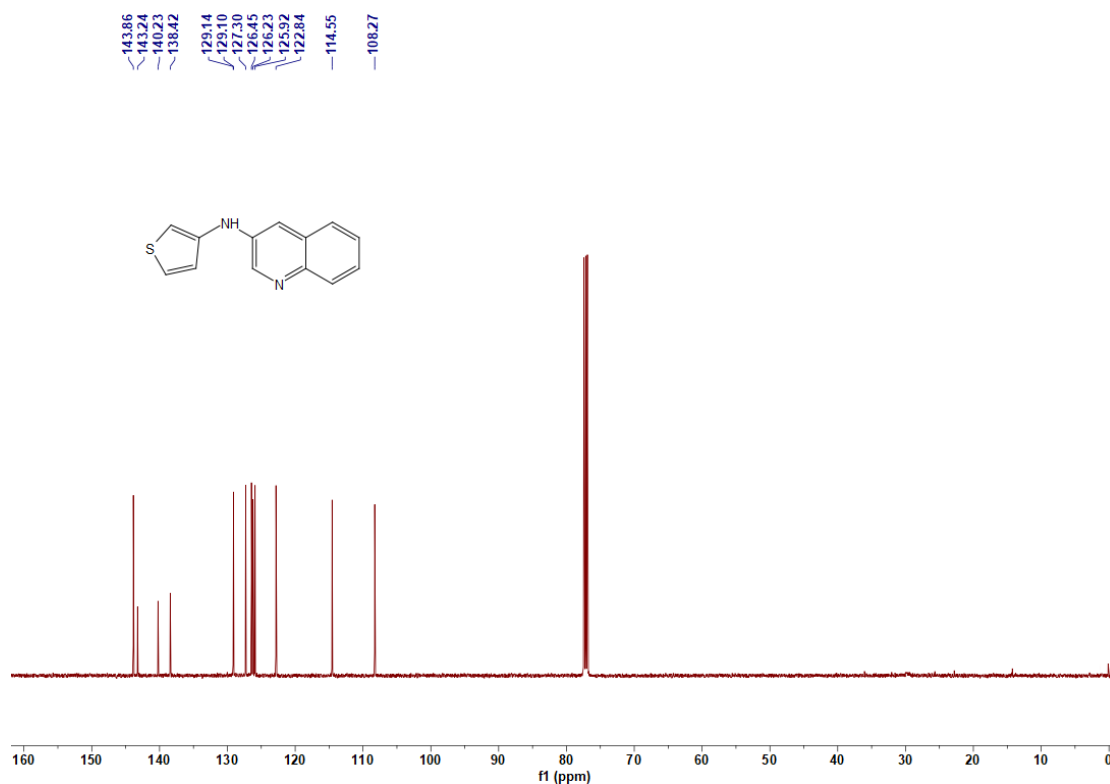

<sup>13</sup>C NMR spectrum of 6ag

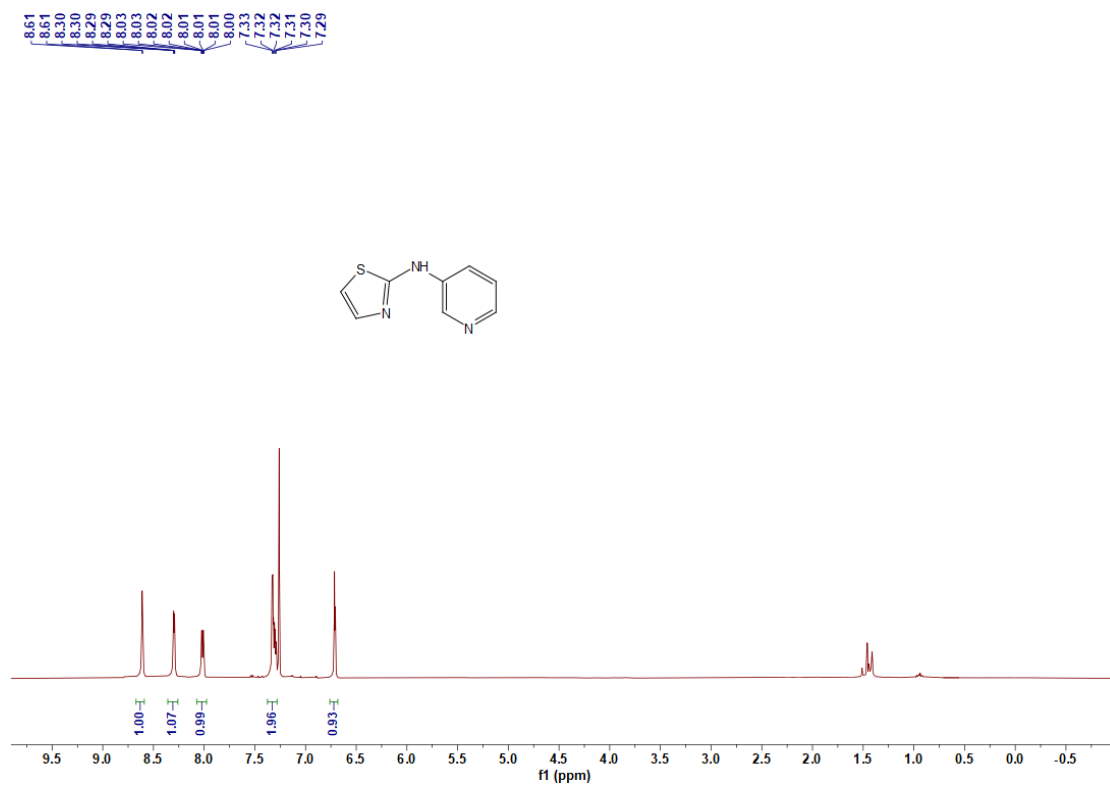

<sup>1</sup>H NMR spectrum of 6ah

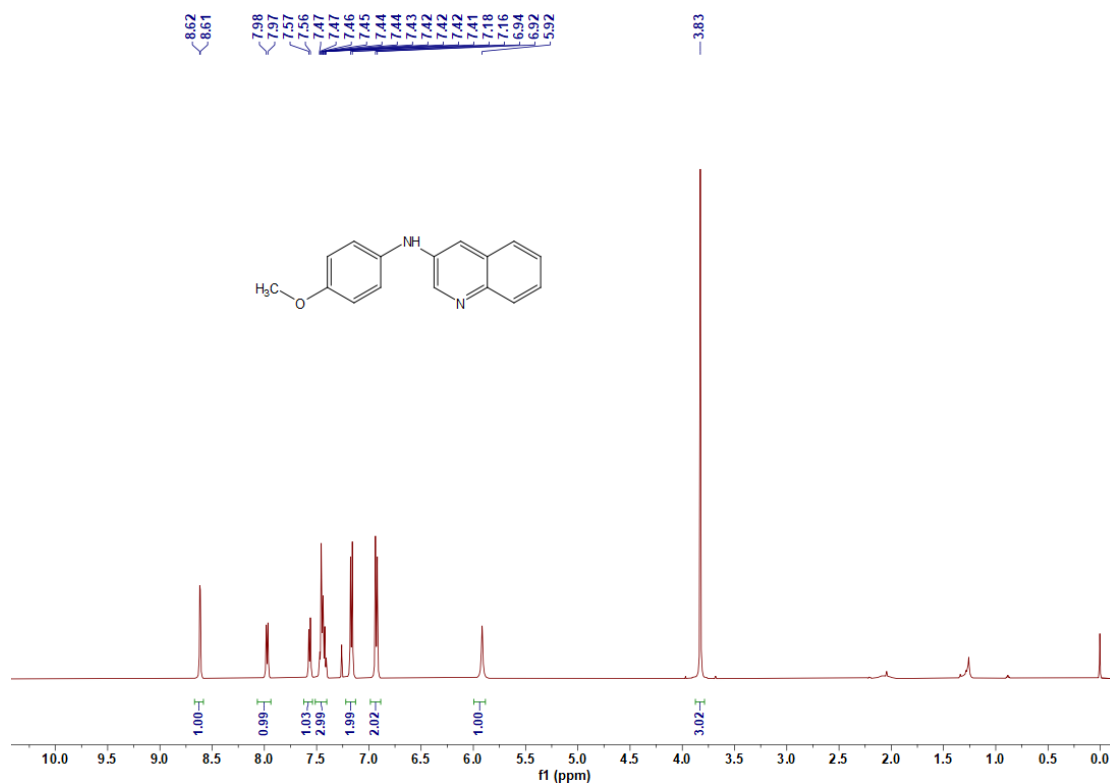

<sup>1</sup>H NMR spectrum of 6ai

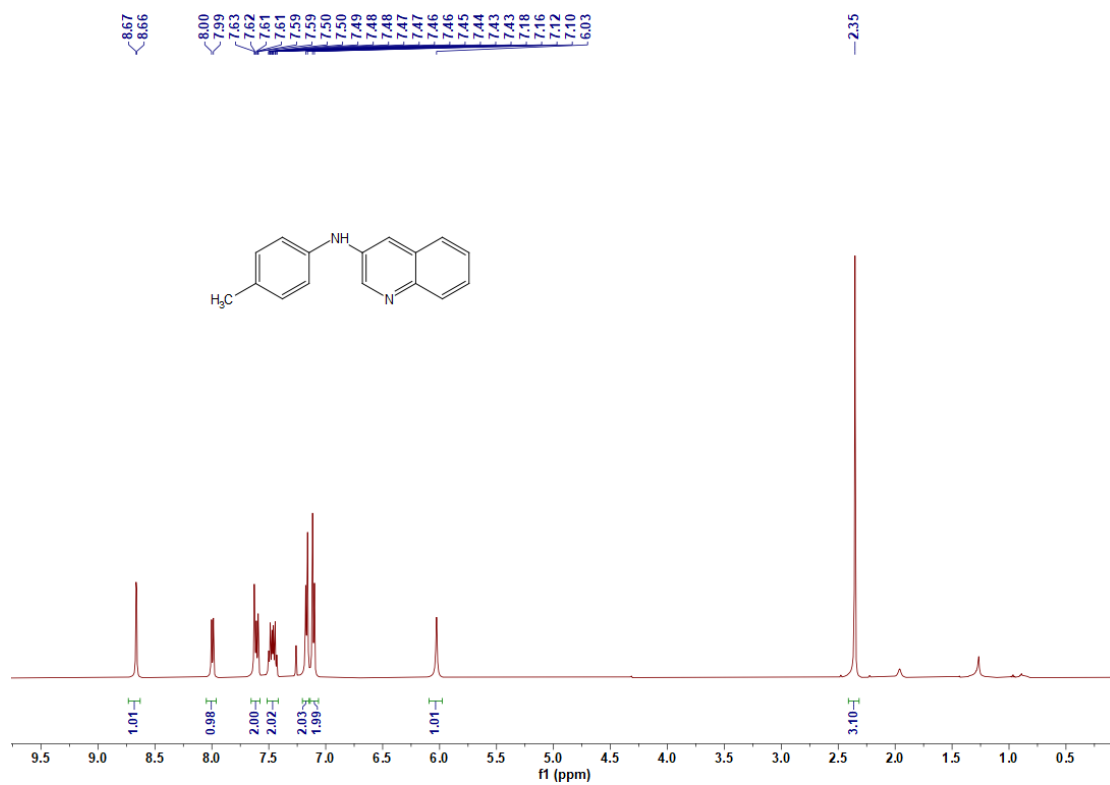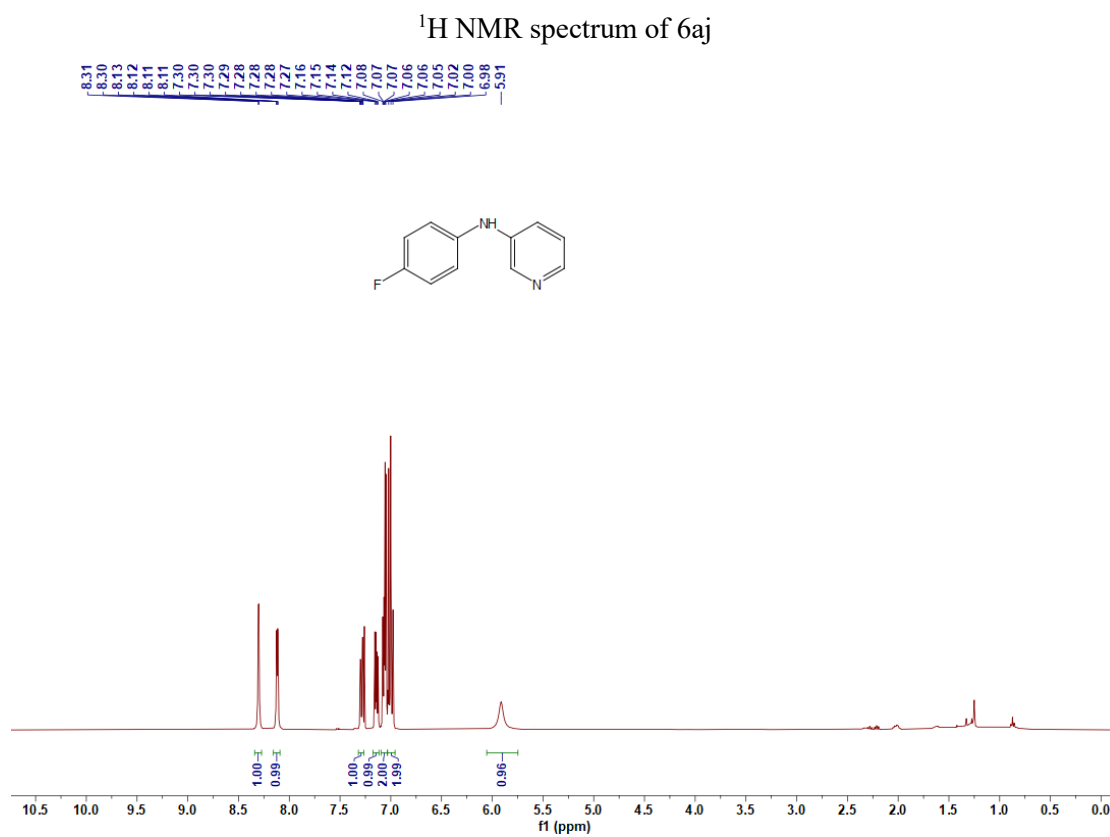

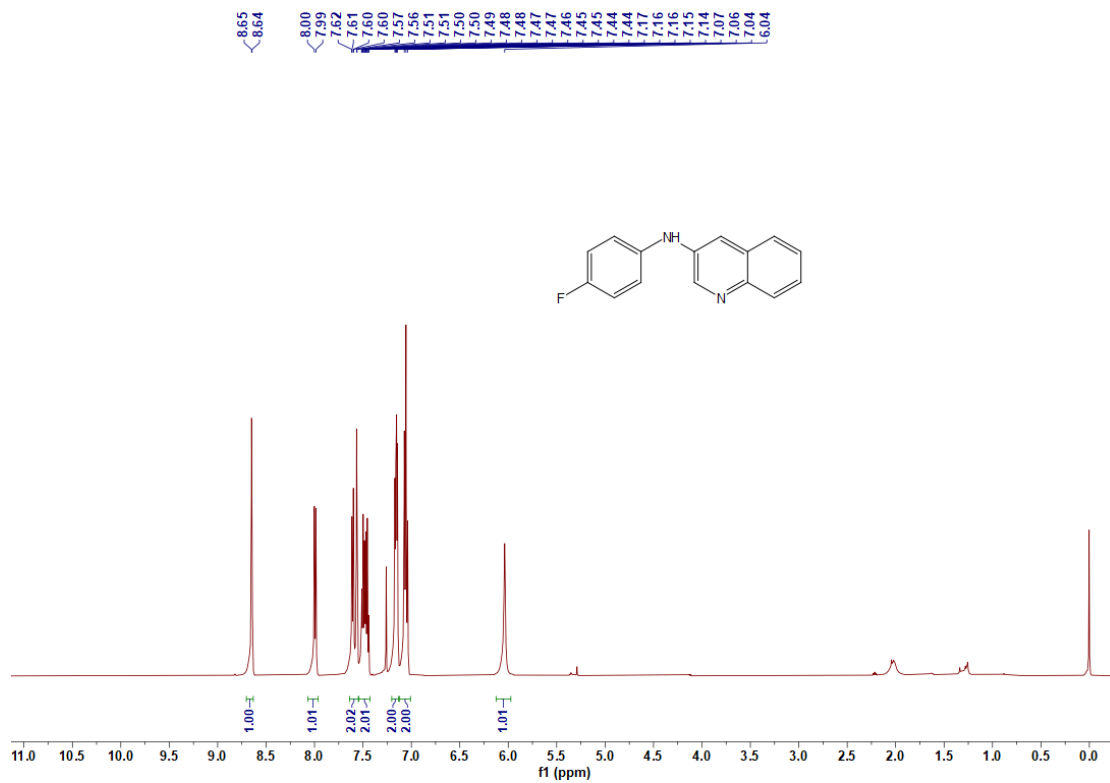

<sup>1</sup>H NMR spectrum of 6al

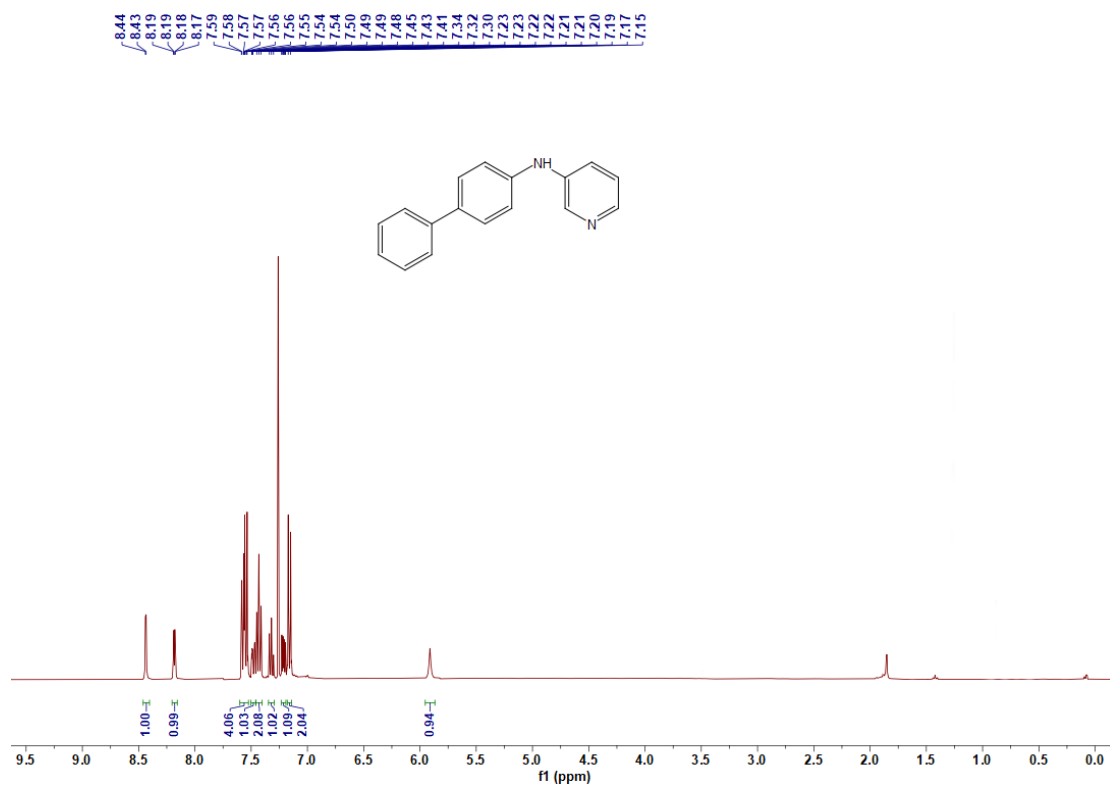

<sup>1</sup>H NMR spectrum of 6am

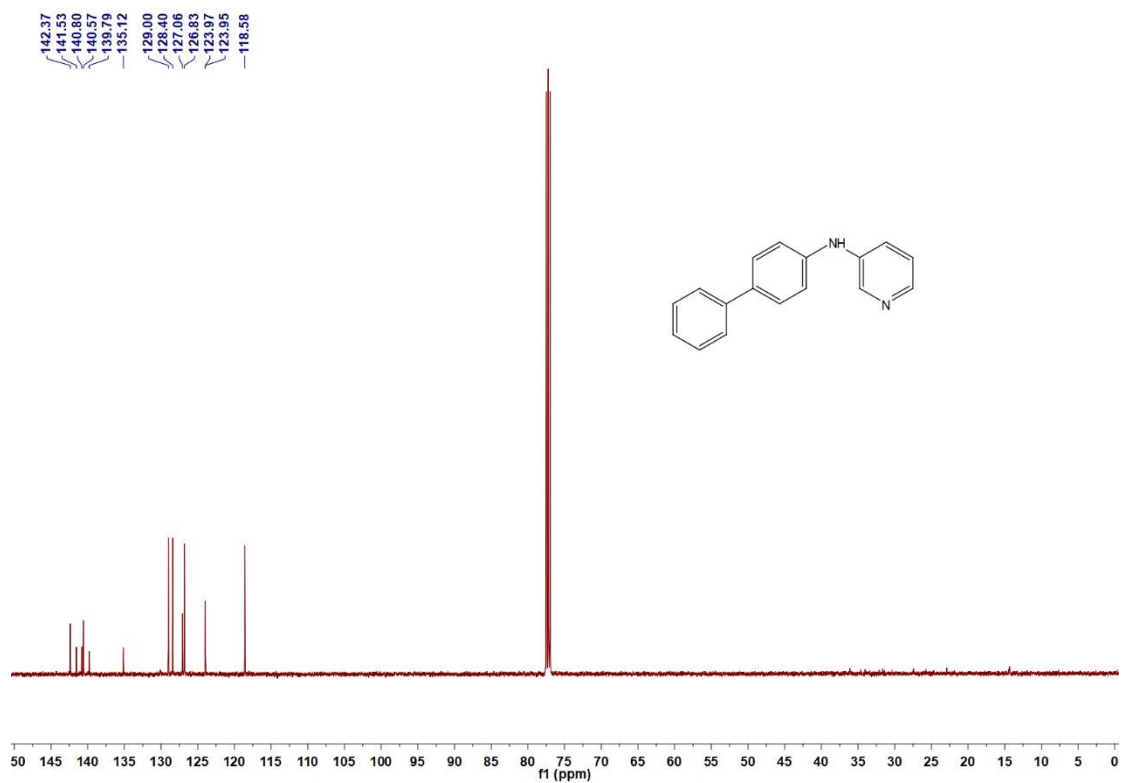

<sup>13</sup>C NMR spectrum of 6a

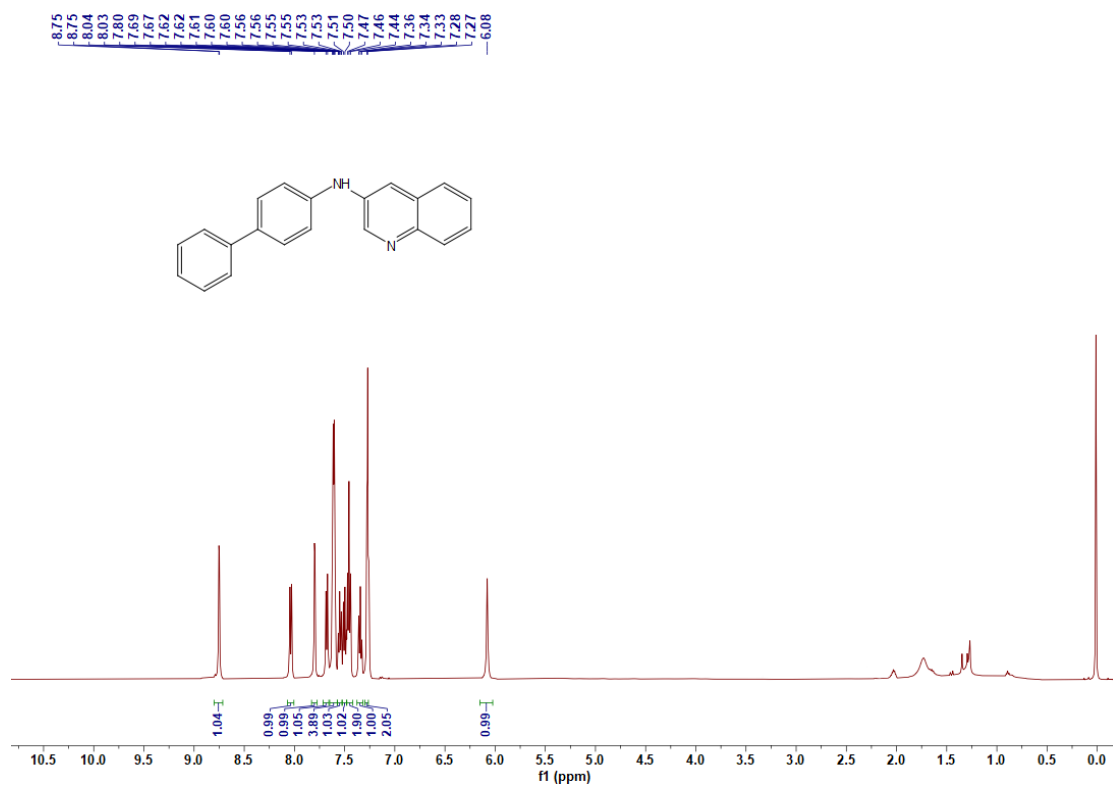

<sup>1</sup>H NMR spectrum of 6a

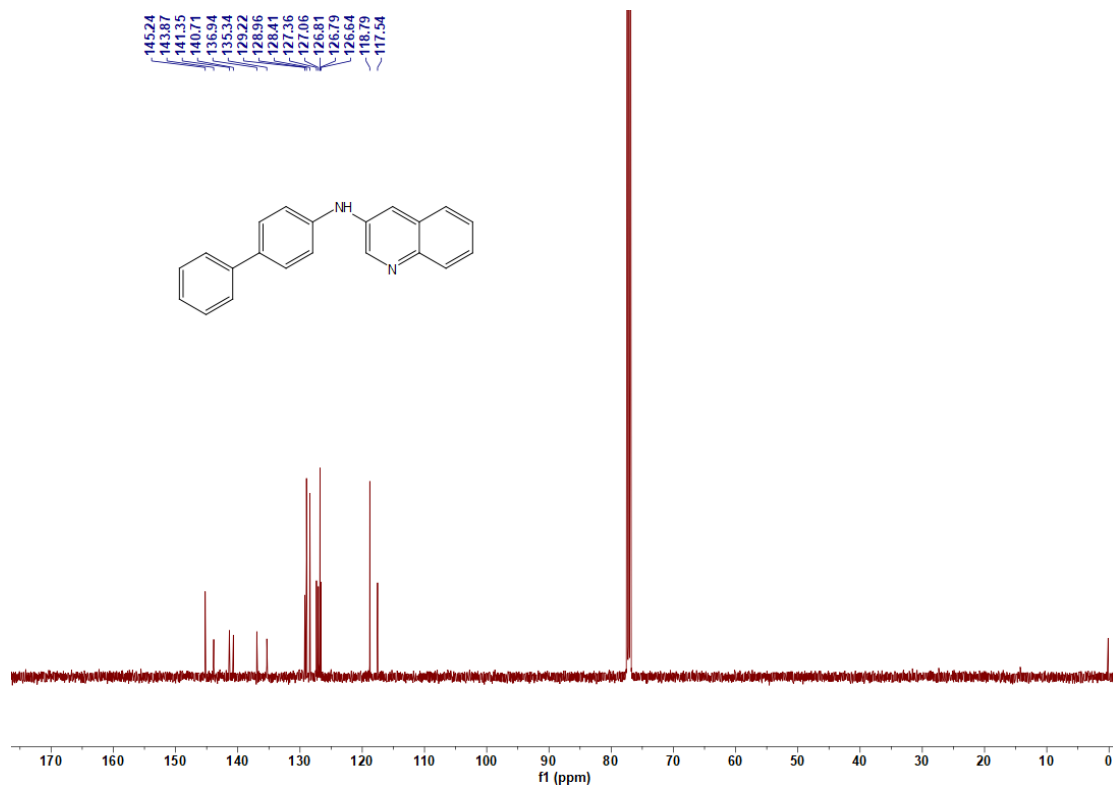

<sup>13</sup>C NMR spectrum of 6an

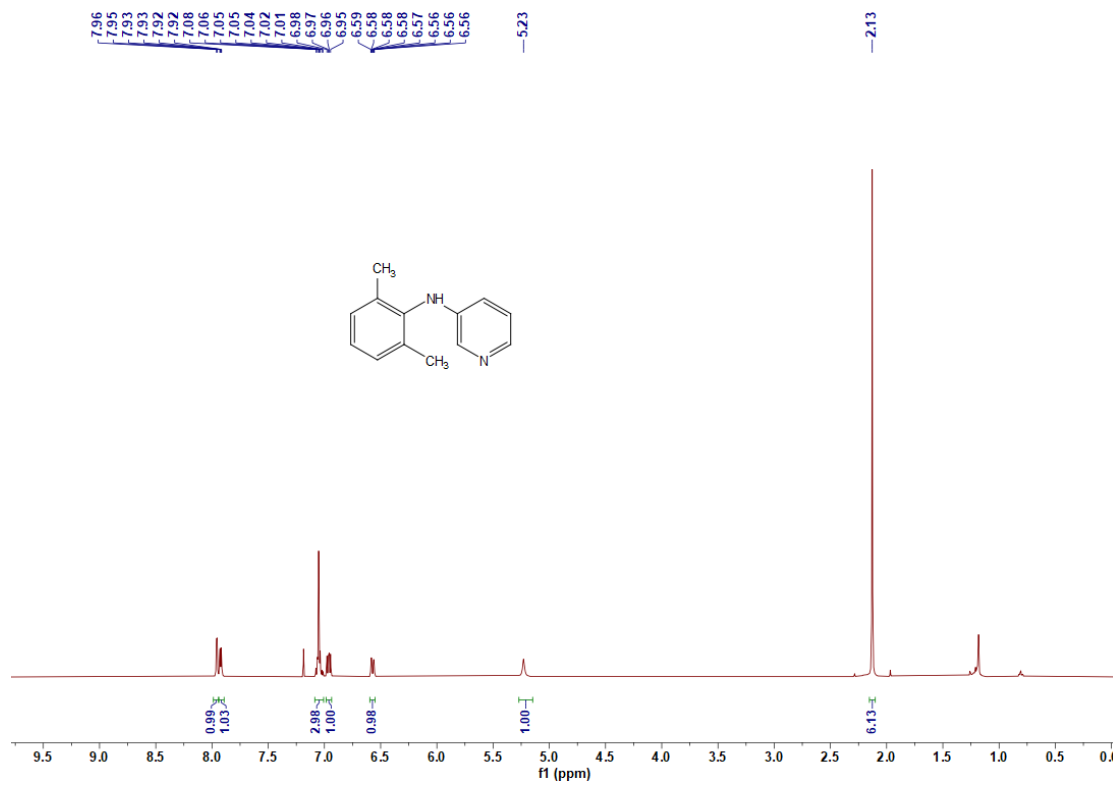

<sup>1</sup>H NMR spectrum of 6ao

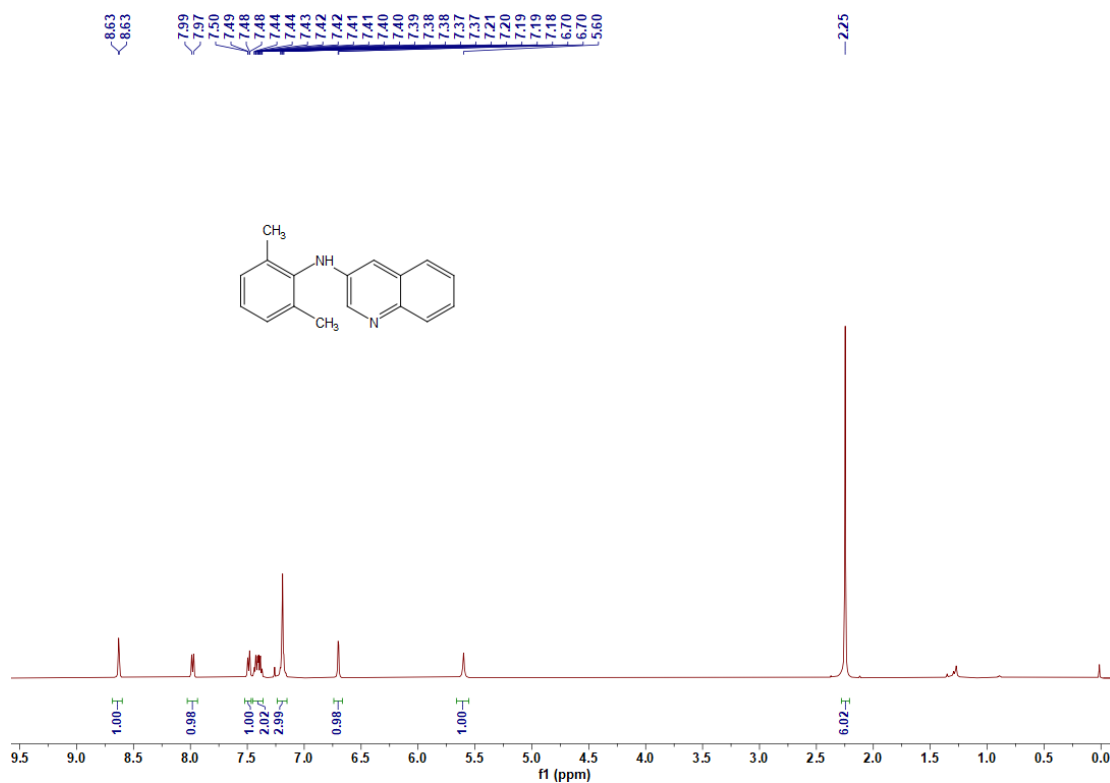

<sup>1</sup>H NMR spectrum of 6ap

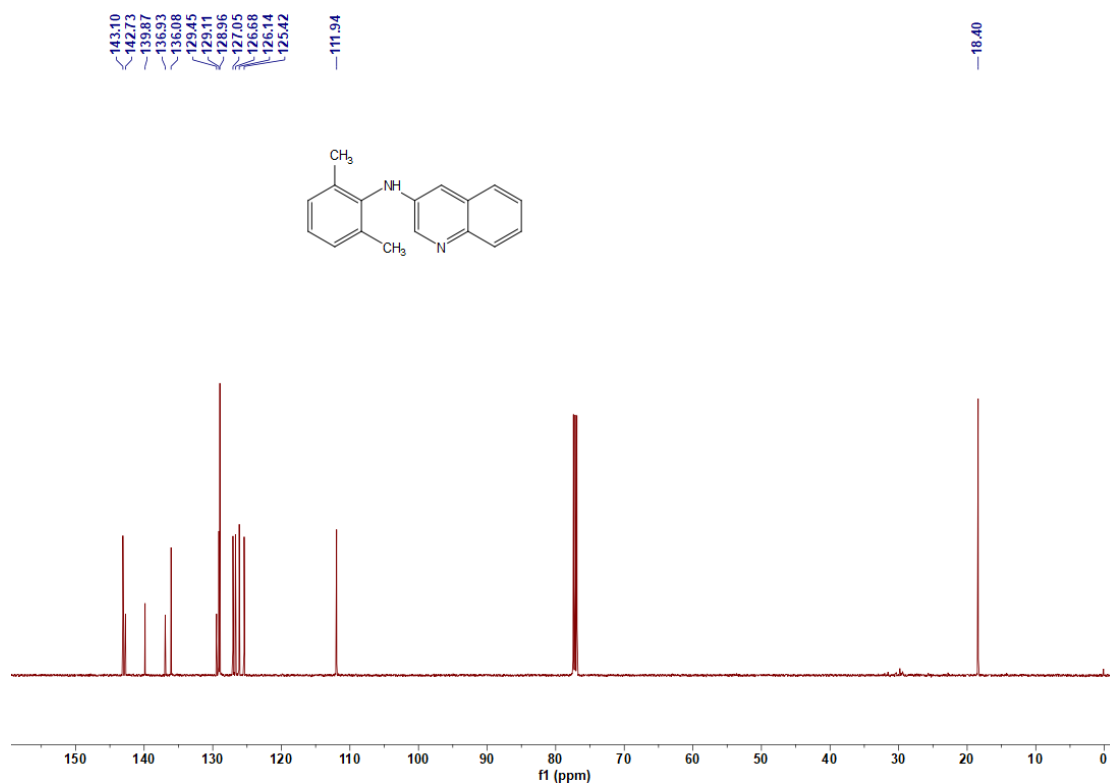

<sup>13</sup>C NMR spectrum of 6ap

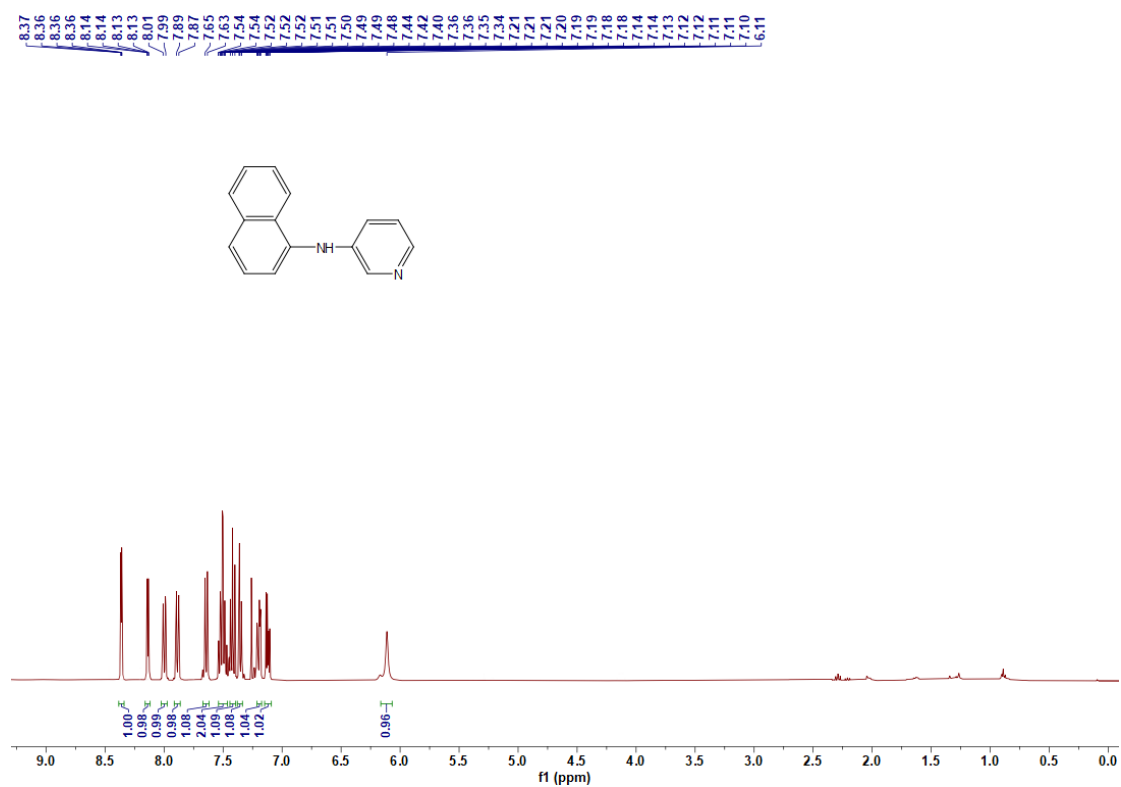

<sup>1</sup>H NMR spectrum of 6a

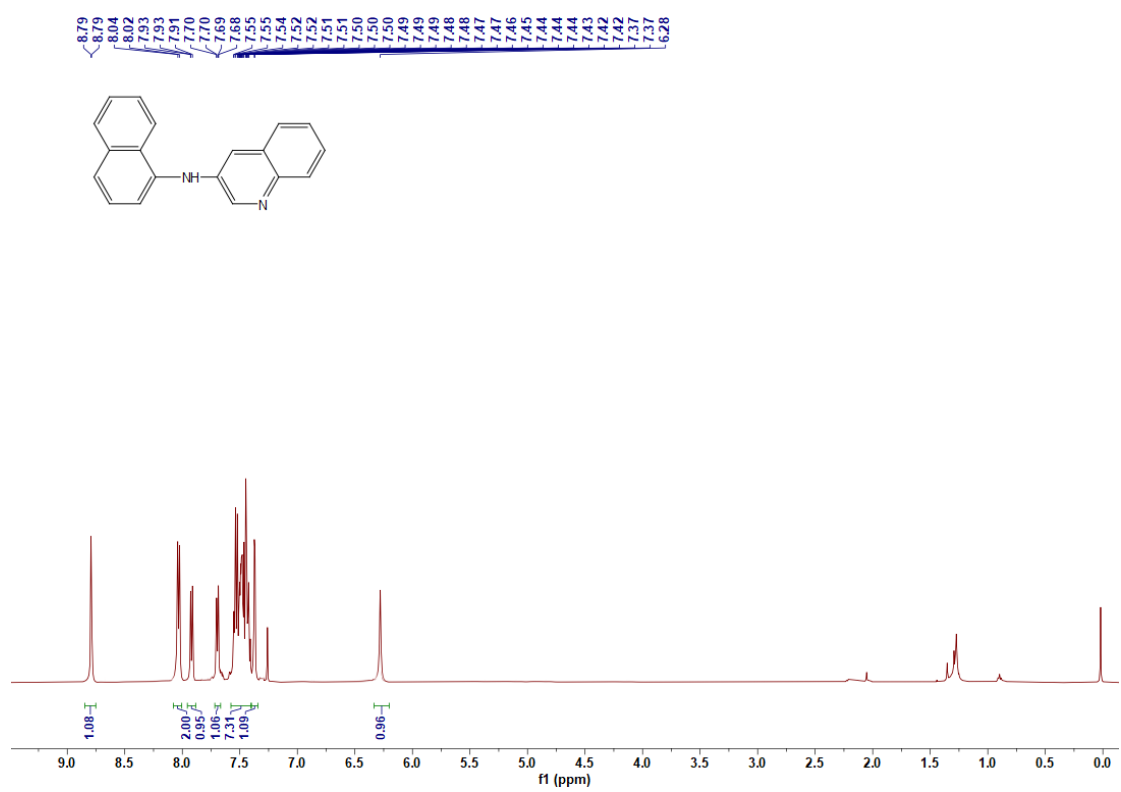

<sup>1</sup>H NMR spectrum of 6b

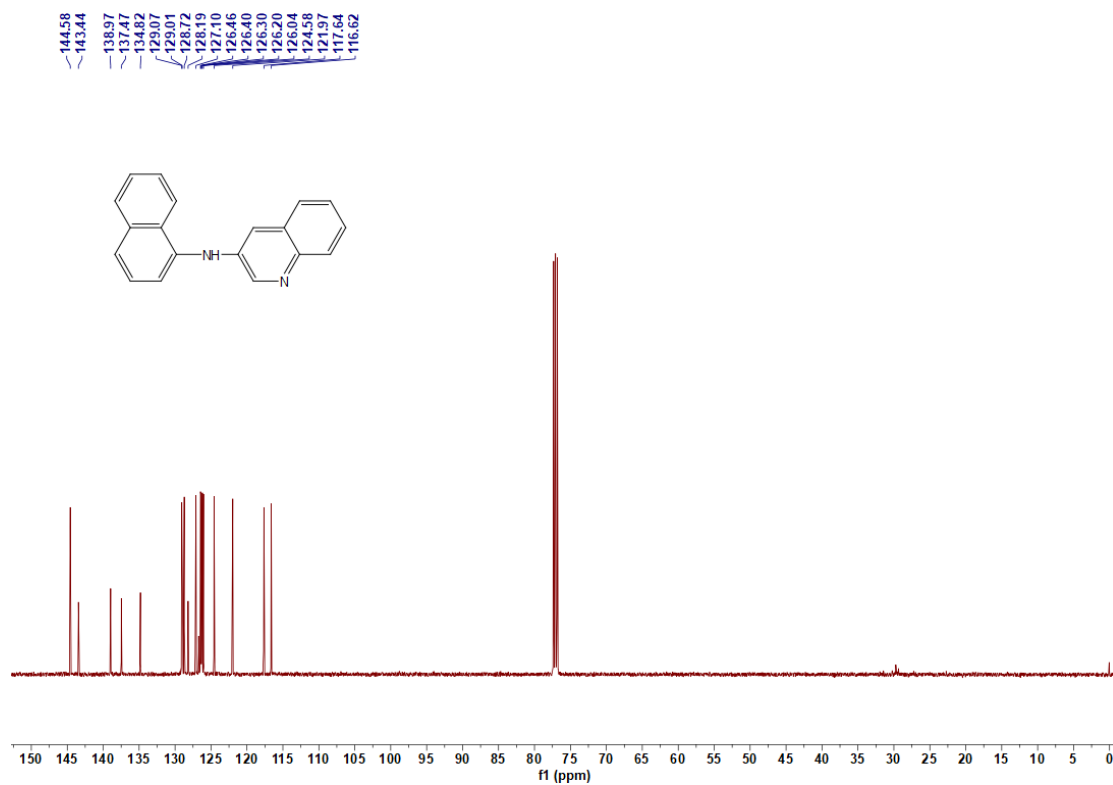

<sup>13</sup>C NMR spectrum of 6ar

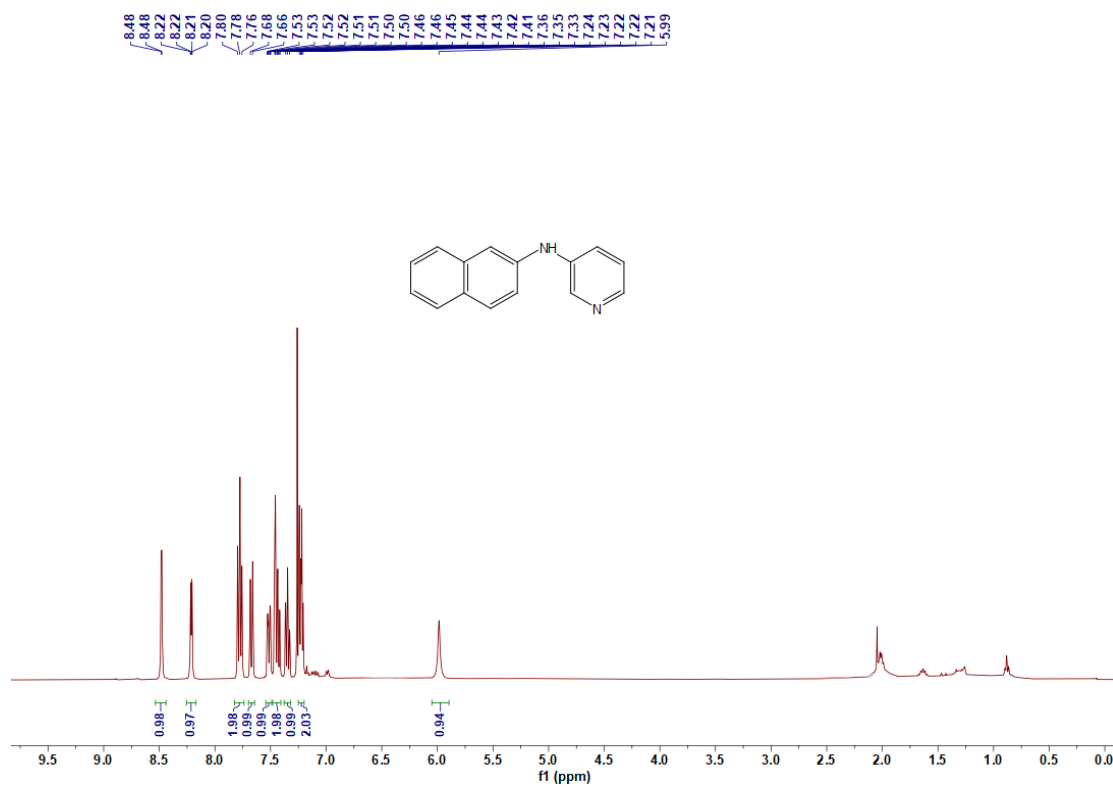

<sup>1</sup>H NMR spectrum of 6as

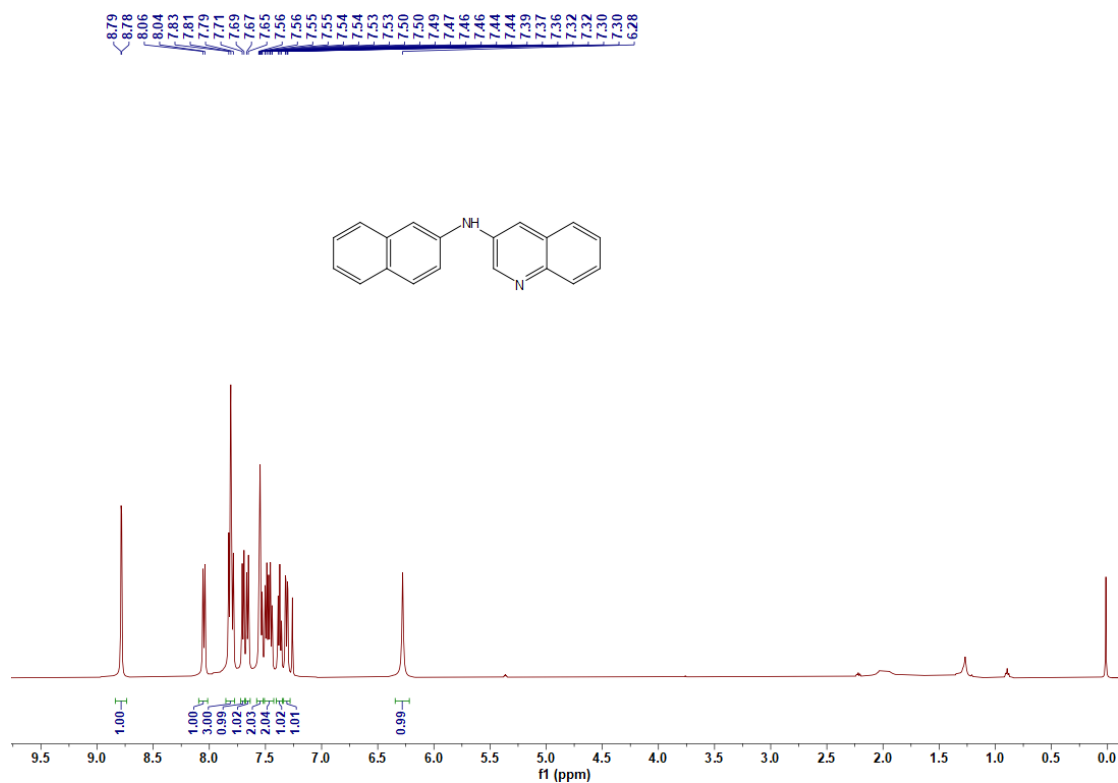

<sup>1</sup>H NMR spectrum of 6at

### Computational studies

The structural optimization and energy-related calculations were both based on the DFT using the Vienna Ab initio Simulation Package (VASP, version 5.4.4) code.<sup>38</sup> The interaction between electrons and ions was treated using the projector augmented wave (PAW) approach, while the exchange-correlation effects were described by the Perdew-Burke-Ernzerhof (PBE) functional within the generalized gradient approximation (GGA). The van der Waals interactions were modeled using the DFT-D3. A Monkhorst-Pack k-point grid of 3×3×1 was employed for Brillouin zone sampling, and a plane-wave energy cutoff of 500 eV was applied. Geometry optimizations were performed using the conjugate-gradient algorithm until the total energy change reached 1×10<sup>-5</sup> eV per atom. For all calculations, atomic forces were relaxed to below 0.01 eV Å<sup>-1</sup>.

Meanwhile, Mulliken charges, the highest occupied molecular orbital (HOMO) and lowest unoccupied molecular orbital (LUMO) of the catalysts were calculated using the Gaussian 16 program (revision C.01).<sup>39</sup> Geometry optimizations were performed within the framework of density functional theory (DFT) at the B3LYP level. The 6-311++G(d,p) basis set was adopted for all non-metal atoms, while the SDD basis set was applied to Pd. Vibrational frequency analyses were conducted to confirm that the optimized structures correspond to true minima on the potential energy surface, with no imaginary frequencies.

### Cartesian coordinates

Pd-IPr<sup>#</sup> (Pd-L<sub>A</sub>)

|    |             |             |             |
|----|-------------|-------------|-------------|
| Pd | 8.82400000  | 10.69100000 | 10.10300000 |
| N  | 9.05900000  | 11.92000000 | 7.38300000  |
| N  | 9.35800000  | 9.77000000  | 7.31100000  |
| C  | 8.61200000  | 6.30800000  | 8.51200000  |
| C  | 9.08500000  | 10.79900000 | 8.19400000  |
| C  | 8.40800000  | 7.63700000  | 8.11400000  |
| C  | 9.87800000  | 5.71800000  | 8.49500000  |
| C  | 11.50600000 | 14.02300000 | 10.31900000 |
| C  | 9.31900000  | 11.59000000 | 6.05400000  |
| C  | 7.91100000  | 15.75800000 | 8.81100000  |
| C  | 9.49700000  | 10.24500000 | 6.00800000  |
| C  | 7.47100000  | 17.09200000 | 9.41300000  |
| C  | 9.57500000  | 13.96400000 | 8.67000000  |
| C  | 7.00400000  | 8.23800000  | 8.11100000  |
| C  | 6.37100000  | 8.29000000  | 6.72300000  |
| C  | 10.95900000 | 6.48400000  | 8.04900000  |
| C  | 10.94900000 | 13.40700000 | 9.03600000  |
| C  | 9.15700000  | 15.21500000 | 9.14100000  |
| C  | 6.08800000  | 7.59500000  | 9.15100000  |
| C  | 6.22300000  | 7.98300000  | 10.49300000 |
| C  | 10.36500000 | 3.34800000  | 7.72700000  |
| C  | 8.07200000  | 2.85200000  | 9.52600000  |
| C  | 4.92300000  | 16.92500000 | 9.67900000  |
| C  | 9.09200000  | 3.73300000  | 9.90600000  |
| C  | 5.27900000  | 9.15100000  | 6.51700000  |
| C  | 7.08400000  | 15.03300000 | 7.94900000  |
| C  | 6.52400000  | 13.06700000 | 6.45800000  |
| C  | 12.44800000 | 15.06100000 | 10.31400000 |
| C  | 6.82700000  | 13.43300000 | 5.00200000  |

|   |             |             |             |
|---|-------------|-------------|-------------|
| C | 7.39200000  | 18.24200000 | 8.40300000  |
| C | 6.20600000  | 16.89600000 | 10.24700000 |
| C | 5.04500000  | 13.24900000 | 6.82000000  |
| C | 8.69400000  | 13.23700000 | 7.83900000  |
| C | 10.81200000 | 7.81100000  | 7.63400000  |
| C | 7.13700000  | 2.39300000  | 10.46000000 |
| C | 10.13200000 | 4.27100000  | 8.92200000  |
| C | 7.45300000  | 13.78300000 | 7.44000000  |
| C | 5.12300000  | 6.63100000  | 8.82700000  |
| C | 12.18300000 | 8.42500000  | 5.58300000  |
| C | 11.77400000 | 7.27900000  | 4.88800000  |
| C | 6.62700000  | 12.47100000 | 3.99800000  |
| C | 12.90500000 | 15.61700000 | 11.51300000 |
| C | 3.79100000  | 16.66300000 | 10.45400000 |
| C | 11.94700000 | 13.45700000 | 7.88400000  |
| C | 6.32100000  | 16.61700000 | 11.61600000 |
| C | 4.64600000  | 9.22700000  | 5.27600000  |
| C | 4.32100000  | 6.06400000  | 9.82200000  |
| C | 6.72400000  | 19.43300000 | 8.73800000  |
| C | 13.30400000 | 8.24000000  | 7.86800000  |
| C | 5.42000000  | 7.42300000  | 11.48800000 |
| C | 13.43400000 | 8.69100000  | 9.19200000  |
| C | 9.15800000  | 4.13600000  | 11.25000000 |
| C | 12.77400000 | 9.47100000  | 4.85500000  |
| C | 4.57000000  | 12.69900000 | 8.02400000  |
| C | 5.19000000  | 16.36200000 | 12.39700000 |
| C | 14.35300000 | 7.50000000  | 7.30700000  |
| C | 3.92000000  | 16.37800000 | 11.81600000 |
| C | 12.02200000 | 8.57600000  | 7.09900000  |
| C | 11.04200000 | 13.54600000 | 11.55400000 |
| C | 14.58100000 | 8.41000000  | 9.93400000  |

|   |             |             |             |
|---|-------------|-------------|-------------|
| C | 7.21000000  | 2.80500000  | 11.79100000 |
| C | 6.70800000  | 20.51900000 | 7.86200000  |
| C | 12.43100000 | 15.13700000 | 12.73600000 |
| C | 9.52600000  | 8.39200000  | 7.69700000  |
| C | 4.46500000  | 6.45700000  | 11.15400000 |
| C | 7.28300000  | 14.70300000 | 4.62300000  |
| C | 11.29400000 | 2.30200000  | 7.83600000  |
| C | 13.06000000 | 12.60000000 | 7.91500000  |
| C | 4.13900000  | 13.93100000 | 5.99800000  |
| C | 11.49700000 | 14.09600000 | 12.75300000 |
| C | 6.81400000  | 7.51200000  | 5.64500000  |
| C | 8.22800000  | 3.67900000  | 12.18400000 |
| C | 7.36400000  | 20.44300000 | 6.63000000  |
| C | 8.05200000  | 18.18200000 | 7.16800000  |
| C | 11.82300000 | 14.34400000 | 6.80500000  |
| C | 2.79500000  | 14.06200000 | 6.36600000  |
| C | 9.66800000  | 3.49500000  | 6.51900000  |
| C | 15.50500000 | 7.21700000  | 8.05000000  |
| C | 11.94900000 | 7.18000000  | 3.50300000  |
| C | 5.09400000  | 8.44100000  | 4.20900000  |
| C | 12.94800000 | 9.37600000  | 3.47400000  |
| C | 14.01900000 | 12.62600000 | 6.90200000  |
| C | 6.88200000  | 12.76700000 | 2.65800000  |
| C | 3.23100000  | 12.82700000 | 8.39200000  |
| C | 12.53600000 | 8.22700000  | 2.79000000  |
| C | 9.89000000  | 2.61900000  | 5.45200000  |
| C | 2.33500000  | 13.51100000 | 7.56200000  |
| C | 15.62400000 | 7.67100000  | 9.36500000  |
| C | 13.88200000 | 13.51400000 | 5.82900000  |
| C | 7.53800000  | 15.00300000 | 3.28100000  |
| C | 12.78100000 | 14.37200000 | 5.78500000  |

|   |             |             |             |
|---|-------------|-------------|-------------|
| C | 8.03800000  | 19.26900000 | 6.28900000  |
| C | 7.34200000  | 14.03600000 | 2.29300000  |
| C | 6.18100000  | 7.58600000  | 4.39900000  |
| C | 10.81900000 | 1.58300000  | 5.57400000  |
| C | 11.52300000 | 1.42800000  | 6.77100000  |
| H | 7.75500000  | 5.73300000  | 8.86500000  |
| H | 9.34800000  | 12.33300000 | 5.26900000  |
| H | 9.71400000  | 9.59000000  | 5.17400000  |
| H | 8.26500000  | 17.37500000 | 10.12700000 |
| H | 7.12800000  | 9.28500000  | 8.44800000  |
| H | 11.95800000 | 6.04100000  | 8.03500000  |
| H | 10.77800000 | 12.33800000 | 9.27500000  |
| H | 9.82300000  | 15.77200000 | 9.80200000  |
| H | 6.97600000  | 8.74200000  | 10.74100000 |
| H | 8.01300000  | 2.50800000  | 8.49200000  |
| H | 4.80300000  | 17.16500000 | 8.62200000  |
| H | 4.91700000  | 9.76500000  | 7.34500000  |
| H | 6.10400000  | 15.42900000 | 7.68100000  |
| H | 6.72000000  | 11.98600000 | 6.54900000  |
| H | 12.83200000 | 15.43700000 | 9.36300000  |
| H | 6.35100000  | 1.70600000  | 10.14300000 |
| H | 11.08600000 | 4.29000000  | 9.47600000  |
| H | 4.99200000  | 6.32600000  | 7.78700000  |
| H | 11.30500000 | 6.45500000  | 5.42800000  |
| H | 6.27500000  | 11.47400000 | 4.27400000  |
| H | 13.63800000 | 16.42500000 | 11.48900000 |
| H | 2.80400000  | 16.68100000 | 9.99000000  |
| H | 7.31200000  | 16.59300000 | 12.07600000 |
| H | 3.80200000  | 9.90600000  | 5.14400000  |
| H | 3.57700000  | 5.31300000  | 9.55200000  |
| H | 6.20700000  | 19.50700000 | 9.69600000  |

|   |             |             |             |
|---|-------------|-------------|-------------|
| H | 5.53700000  | 7.74300000  | 12.52500000 |
| H | 12.61900000 | 9.26100000  | 9.64600000  |
| H | 9.95000000  | 4.82000000  | 11.56500000 |
| H | 13.08600000 | 10.37700000 | 5.37800000  |
| H | 5.26500000  | 12.17300000 | 8.68400000  |
| H | 5.30400000  | 16.15100000 | 13.46100000 |
| H | 14.27700000 | 7.14800000  | 6.27800000  |
| H | 3.03500000  | 16.17500000 | 12.42100000 |
| H | 11.83700000 | 9.64700000  | 7.28100000  |
| H | 10.30700000 | 12.73200000 | 11.55600000 |
| H | 14.66500000 | 8.77300000  | 10.96000000 |
| H | 6.48300000  | 2.44400000  | 12.52000000 |
| H | 6.18000000  | 21.43100000 | 8.14400000  |
| H | 12.79000000 | 15.56900000 | 13.67200000 |
| H | 3.83600000  | 6.01600000  | 11.92900000 |
| H | 7.44900000  | 15.46800000 | 5.38400000  |
| H | 11.84700000 | 2.17400000  | 8.77000000  |
| H | 13.17700000 | 11.90700000 | 8.75100000  |
| H | 4.48200000  | 14.35900000 | 5.05500000  |
| H | 11.12600000 | 13.70900000 | 13.70500000 |
| H | 7.66600000  | 6.84400000  | 5.77700000  |
| H | 8.29900000  | 4.00500000  | 13.22300000 |
| H | 7.35400000  | 21.29300000 | 5.94600000  |
| H | 8.59200000  | 17.27500000 | 6.89100000  |
| H | 10.96800000 | 15.02000000 | 6.75900000  |
| H | 2.10700000  | 14.59600000 | 5.70800000  |
| H | 8.95000000  | 4.31000000  | 6.40900000  |
| H | 16.31300000 | 6.64300000  | 7.59400000  |
| H | 11.62300000 | 6.27800000  | 2.98300000  |
| H | 4.60000000  | 8.49800000  | 3.23800000  |
| H | 13.40000000 | 10.20500000 | 2.92800000  |

|   |             |             |            |
|---|-------------|-------------|------------|
| H | 14.87400000 | 11.95000000 | 6.95100000 |
| H | 6.72800000  | 12.00100000 | 1.89700000 |
| H | 2.88400000  | 12.39100000 | 9.33000000 |
| H | 12.66700000 | 8.15300000  | 1.71000000 |
| H | 9.33800000  | 2.75200000  | 4.52000000 |
| H | 1.28600000  | 13.61000000 | 7.84800000 |
| H | 16.52600000 | 7.45700000  | 9.94100000 |
| H | 14.62900000 | 13.53400000 | 5.03400000 |
| H | 7.89600000  | 15.99800000 | 3.01100000 |
| H | 12.66400000 | 15.06900000 | 4.95400000 |
| H | 8.56100000  | 19.19700000 | 5.33300000 |
| H | 7.54900000  | 14.26800000 | 1.24700000 |
| H | 6.54300000  | 6.97000000  | 3.57300000 |
| H | 10.99800000 | 0.90300000  | 4.74000000 |
| H | 12.25400000 | 0.62500000  | 6.87700000 |

2-chloro-1,3-dimethylbenzene

|   |             |             |             |
|---|-------------|-------------|-------------|
| C | 13.31200000 | 12.35800000 | 16.62800000 |
| C | 13.31500000 | 11.12500000 | 15.95900000 |
| C | 13.29700000 | 9.92000000  | 16.65800000 |
| C | 13.27300000 | 9.92900000  | 18.05000000 |
| C | 13.26300000 | 11.13000000 | 18.77400000 |
| C | 13.28300000 | 12.32700000 | 18.03400000 |
| C | 13.24300000 | 11.11500000 | 20.27700000 |
| C | 13.32900000 | 13.64700000 | 15.85500000 |
| H | 13.33200000 | 11.12000000 | 14.86800000 |
| H | 13.26300000 | 8.98500000  | 18.59900000 |
| H | 12.79300000 | 10.18500000 | 20.64800000 |
| H | 12.68100000 | 11.96500000 | 20.68300000 |
| H | 14.26300000 | 11.18000000 | 20.68800000 |
| H | 13.72800000 | 13.48500000 | 14.84500000 |
| H | 13.93800000 | 14.40900000 | 16.35700000 |

|                                            |             |             |             |
|--------------------------------------------|-------------|-------------|-------------|
| H                                          | 12.31500000 | 14.06400000 | 15.75400000 |
| H                                          | 13.30000000 | 8.97300000  | 16.11600000 |
| Cl                                         | 13.27000000 | 13.84800000 | 18.89900000 |
| IM1-IPr <sup>#</sup> (IM1-L <sub>A</sub> ) |             |             |             |
| Pd                                         | 9.31000000  | 10.53200000 | 10.32700000 |
| N                                          | 9.12100000  | 11.90100000 | 7.48500000  |
| N                                          | 9.34000000  | 9.75200000  | 7.38100000  |
| C                                          | 8.55000000  | 6.24800000  | 8.41500000  |
| C                                          | 9.18500000  | 10.77800000 | 8.30100000  |
| C                                          | 8.35100000  | 7.59000000  | 8.05500000  |
| C                                          | 9.81900000  | 5.65700000  | 8.40600000  |
| C                                          | 11.68700000 | 14.30000000 | 10.15500000 |
| C                                          | 9.27500000  | 11.56900000 | 6.14100000  |
| C                                          | 7.95100000  | 15.77900000 | 8.79700000  |
| C                                          | 9.40200000  | 10.22300000 | 6.07500000  |
| C                                          | 7.48900000  | 17.11100000 | 9.38600000  |
| C                                          | 9.65600000  | 14.02100000 | 8.65500000  |
| C                                          | 6.94800000  | 8.19900000  | 7.97500000  |
| C                                          | 6.40500000  | 8.28300000  | 6.53900000  |
| C                                          | 10.90900000 | 6.43300000  | 7.99900000  |
| C                                          | 11.06900000 | 13.53600000 | 8.98200000  |
| C                                          | 9.22300000  | 15.28200000 | 9.08700000  |
| C                                          | 5.90100000  | 7.52800000  | 8.86400000  |
| C                                          | 5.46500000  | 8.17000000  | 10.03200000 |
| C                                          | 10.31700000 | 3.28100000  | 7.61500000  |
| C                                          | 7.89400000  | 2.97700000  | 9.38500000  |
| C                                          | 4.93600000  | 16.95900000 | 9.64000000  |
| C                                          | 9.06200000  | 3.63600000  | 9.79400000  |
| C                                          | 5.32000000  | 9.14000000  | 6.28700000  |
| C                                          | 7.11800000  | 15.00700000 | 7.98600000  |
| C                                          | 6.56700000  | 13.02100000 | 6.53800000  |

|   |             |             |             |
|---|-------------|-------------|-------------|
| C | 12.72100000 | 15.23600000 | 10.00900000 |
| C | 6.84300000  | 13.38800000 | 5.07600000  |
| C | 7.40800000  | 18.25900000 | 8.37700000  |
| C | 6.21700000  | 16.91000000 | 10.21000000 |
| C | 5.09000000  | 13.20200000 | 6.90700000  |
| C | 8.75800000  | 13.23400000 | 7.90200000  |
| C | 10.77200000 | 7.77400000  | 7.63300000  |
| C | 6.97400000  | 2.50400000  | 10.32500000 |
| C | 10.08100000 | 4.20200000  | 8.80900000  |
| C | 7.50100000  | 13.75000000 | 7.50600000  |
| C | 5.30300000  | 6.30500000  | 8.51600000  |
| C | 12.12000000 | 8.42200000  | 5.57700000  |
| C | 11.74200000 | 7.27100000  | 4.87300000  |
| C | 6.61300000  | 12.43100000 | 4.07400000  |
| C | 13.23900000 | 15.90600000 | 11.12300000 |
| C | 3.79900000  | 16.70300000 | 10.41000000 |
| C | 12.00400000 | 13.51300000 | 7.77800000  |
| C | 6.32400000  | 16.61300000 | 11.57600000 |
| C | 4.71300000  | 9.18600000  | 5.03200000  |
| C | 4.32700000  | 5.72600000  | 9.33000000  |
| C | 6.77300000  | 19.45900000 | 8.73600000  |
| C | 13.27600000 | 8.21900000  | 7.83000000  |
| C | 4.47600000  | 7.59700000  | 10.84000000 |
| C | 13.49000000 | 8.75600000  | 9.11000000  |
| C | 9.29500000  | 3.77800000  | 11.17000000 |
| C | 12.69400000 | 9.48200000  | 4.85600000  |
| C | 4.61400000  | 12.64300000 | 8.10400000  |
| C | 5.19000000  | 16.36400000 | 12.35200000 |
| C | 14.27300000 | 7.40900000  | 7.27400000  |
| C | 3.92100000  | 16.40300000 | 11.76900000 |
| C | 11.97500000 | 8.55400000  | 7.09700000  |

|   |             |             |             |
|---|-------------|-------------|-------------|
| C | 11.18300000 | 14.05700000 | 11.44100000 |
| C | 14.66200000 | 8.48300000  | 9.81600000  |
| C | 7.21000000  | 2.67200000  | 11.69100000 |
| C | 6.76200000  | 20.55400000 | 7.87300000  |
| C | 12.73600000 | 15.64800000 | 12.39900000 |
| C | 9.48900000  | 8.35800000  | 7.71500000  |
| C | 3.91200000  | 6.36600000  | 10.49900000 |
| C | 7.28500000  | 14.65900000 | 4.68600000  |
| C | 11.23700000 | 2.22900000  | 7.74400000  |
| C | 13.10800000 | 12.64400000 | 7.79600000  |
| C | 4.18700000  | 13.89800000 | 6.09400000  |
| C | 11.70400000 | 14.71700000 | 12.55300000 |
| C | 6.88600000  | 7.49600000  | 5.48400000  |
| C | 8.38000000  | 3.30700000  | 12.11300000 |
| C | 7.38800000  | 20.47600000 | 6.62600000  |
| C | 8.03300000  | 18.19300000 | 7.12400000  |
| C | 11.86600000 | 14.38800000 | 6.69200000  |
| C | 2.84400000  | 14.02700000 | 6.46100000  |
| C | 9.63700000  | 3.42200000  | 6.39800000  |
| C | 15.44800000 | 7.13000000  | 7.98100000  |
| C | 11.93400000 | 7.17800000  | 3.49100000  |
| C | 5.18500000  | 8.37500000  | 3.99500000  |
| C | 12.88400000 | 9.39500000  | 3.47700000  |
| C | 14.05000000 | 12.65500000 | 6.76600000  |
| C | 6.82200000  | 12.73300000 | 2.72800000  |
| C | 3.27400000  | 12.76700000 | 8.47200000  |
| C | 12.50500000 | 8.23900000  | 2.78600000  |
| C | 9.86900000  | 2.53500000  | 5.34100000  |
| C | 2.38100000  | 13.46000000 | 7.64800000  |
| C | 15.64600000 | 7.66200000  | 9.25500000  |
| C | 13.90100000 | 13.53500000 | 5.68900000  |

|   |             |             |             |
|---|-------------|-------------|-------------|
| C | 7.49500000  | 14.96600000 | 3.33700000  |
| C | 12.80400000 | 14.40000000 | 5.65500000  |
| C | 8.02300000  | 19.29000000 | 6.25500000  |
| C | 7.26600000  | 14.00400000 | 2.35200000  |
| C | 6.28100000  | 7.54100000  | 4.22200000  |
| C | 10.79100000 | 1.49600000  | 5.48300000  |
| C | 11.47600000 | 1.34500000  | 6.69200000  |
| C | 10.60200000 | 9.71600000  | 12.10300000 |
| C | 10.60600000 | 8.32100000  | 11.83700000 |
| C | 9.45400000  | 7.55200000  | 11.95000000 |
| C | 8.23600000  | 8.15000000  | 12.29500000 |
| C | 8.14900000  | 9.52000000  | 12.56600000 |
| C | 9.35000000  | 10.29700000 | 12.49400000 |
| C | 6.88000000  | 10.12100000 | 13.10400000 |
| C | 11.91600000 | 10.42900000 | 12.33300000 |
| H | 7.69000000  | 5.65900000  | 8.73500000  |
| H | 9.27000000  | 12.31500000 | 5.35700000  |
| H | 9.54000000  | 9.56300000  | 5.22800000  |
| H | 8.27400000  | 17.40500000 | 10.10700000 |
| H | 7.04000000  | 9.23400000  | 8.34300000  |
| H | 11.90400000 | 5.98100000  | 7.97500000  |
| H | 10.95000000 | 12.48700000 | 9.32900000  |
| H | 9.90300000  | 15.88500000 | 9.69400000  |
| H | 5.91200000  | 9.12700000  | 10.31300000 |
| H | 7.70800000  | 2.81600000  | 8.32100000  |
| H | 4.82100000  | 17.21200000 | 8.58300000  |
| H | 4.93400000  | 9.77200000  | 7.09100000  |
| H | 6.12100000  | 15.37100000 | 7.73100000  |
| H | 6.77000000  | 11.94100000 | 6.62600000  |
| H | 13.13400000 | 15.44400000 | 9.02000000  |
| H | 6.06900000  | 1.99500000  | 9.98600000  |

|   |             |             |             |
|---|-------------|-------------|-------------|
| H | 11.03900000 | 4.22500000  | 9.35700000  |
| H | 5.58800000  | 5.80800000  | 7.58500000  |
| H | 11.28800000 | 6.43200000  | 5.40600000  |
| H | 6.27200000  | 11.43100000 | 4.35600000  |
| H | 14.04500000 | 16.63000000 | 10.99000000 |
| H | 2.81200000  | 16.73600000 | 9.94300000  |
| H | 7.31500000  | 16.57300000 | 12.03800000 |
| H | 3.86700000  | 9.85700000  | 4.86500000  |
| H | 3.87900000  | 4.77200000  | 9.04100000  |
| H | 6.28000000  | 19.53400000 | 9.70800000  |
| H | 4.14500000  | 8.12000000  | 11.74100000 |
| H | 12.72100000 | 9.39400000  | 9.55300000  |
| H | 10.21500000 | 4.26500000  | 11.50700000 |
| H | 12.98700000 | 10.39300000 | 5.38300000  |
| H | 5.30800000  | 12.11300000 | 8.76300000  |
| H | 5.30000000  | 16.13700000 | 13.41500000 |
| H | 14.14200000 | 7.00300000  | 6.26900000  |
| H | 3.03200000  | 16.20500000 | 12.37200000 |
| H | 11.78500000 | 9.62100000  | 7.29800000  |
| H | 10.37000000 | 13.33700000 | 11.56400000 |
| H | 14.81400000 | 8.92000000  | 10.80600000 |
| H | 6.49000000  | 2.30100000  | 12.42300000 |
| H | 6.26500000  | 21.47700000 | 8.17900000  |
| H | 13.14800000 | 16.16600000 | 13.26900000 |
| H | 3.14400000  | 5.91600000  | 11.13000000 |
| H | 7.46900000  | 15.42500000 | 5.44200000  |
| H | 11.77400000 | 2.10400000  | 8.68800000  |
| H | 13.23800000 | 11.96100000 | 8.64000000  |
| H | 4.53100000  | 14.34000000 | 5.15700000  |
| H | 11.30800000 | 14.49600000 | 13.54700000 |
| H | 7.74500000  | 6.84000000  | 5.64600000  |

|   |             |             |             |
|---|-------------|-------------|-------------|
| H | 8.58600000  | 3.43200000  | 13.17800000 |
| H | 7.38700000  | 21.33600000 | 5.95300000  |
| H | 8.54600000  | 17.27700000 | 6.82500000  |
| H | 11.01900000 | 15.07700000 | 6.66200000  |
| H | 2.15800000  | 14.57300000 | 5.80900000  |
| H | 8.92500000  | 4.24200000  | 6.26800000  |
| H | 16.21500000 | 6.50000000  | 7.52500000  |
| H | 11.63400000 | 6.26800000  | 2.96400000  |
| H | 4.70100000  | 8.39500000  | 3.01600000  |
| H | 13.32600000 | 10.23500000 | 2.93700000  |
| H | 14.90500000 | 11.97600000 | 6.80800000  |
| H | 6.64500000  | 11.96800000 | 1.96800000  |
| H | 2.92400000  | 12.32200000 | 9.40600000  |
| H | 12.65300000 | 8.16900000  | 1.70600000  |
| H | 9.32900000  | 2.66200000  | 4.39900000  |
| H | 1.33100000  | 13.55500000 | 7.93200000  |
| H | 16.56600000 | 7.44900000  | 9.80600000  |
| H | 14.63700000 | 13.54800000 | 4.88300000  |
| H | 7.84200000  | 15.96400000 | 3.05800000  |
| H | 12.68100000 | 15.09600000 | 4.82200000  |
| H | 8.52100000  | 19.21500000 | 5.28600000  |
| H | 7.43500000  | 14.24000000 | 1.30000000  |
| H | 6.67000000  | 6.91600000  | 3.41300000  |
| H | 10.98000000 | 0.81000000  | 4.65500000  |
| H | 12.20100000 | 0.53800000  | 6.81500000  |
| H | 11.55900000 | 7.84600000  | 11.58500000 |
| H | 7.33000000  | 7.54200000  | 12.35100000 |
| H | 6.02300000  | 9.46900000  | 12.88900000 |
| H | 6.68000000  | 11.11800000 | 12.68600000 |
| H | 6.94400000  | 10.24700000 | 14.19900000 |
| H | 12.75400000 | 9.76200000  | 12.08700000 |

|                                            |             |             |             |
|--------------------------------------------|-------------|-------------|-------------|
| H                                          | 12.01500000 | 10.71700000 | 13.39300000 |
| H                                          | 12.01000000 | 11.35000000 | 11.74300000 |
| H                                          | 9.48900000  | 6.48200000  | 11.74100000 |
| Cl                                         | 9.35500000  | 11.82100000 | 13.39700000 |
| TS1-IPr <sup>#</sup> (TS1-L <sub>A</sub> ) |             |             |             |
| Pd                                         | 8.98600000  | 10.58000000 | 10.32800000 |
| N                                          | 9.12100000  | 11.98000000 | 7.42800000  |
| N                                          | 9.32700000  | 9.83200000  | 7.33300000  |
| C                                          | 8.55500000  | 6.34100000  | 8.45300000  |
| C                                          | 9.09800000  | 10.85900000 | 8.22700000  |
| C                                          | 8.35000000  | 7.67400000  | 8.06800000  |
| C                                          | 9.81900000  | 5.74700000  | 8.43400000  |
| C                                          | 11.70000000 | 14.33000000 | 10.14300000 |
| C                                          | 9.36500000  | 11.65600000 | 6.09600000  |
| C                                          | 7.97300000  | 15.84800000 | 8.76600000  |
| C                                          | 9.48400000  | 10.30500000 | 6.03400000  |
| C                                          | 7.51800000  | 17.17800000 | 9.36200000  |
| C                                          | 9.67300000  | 14.09100000 | 8.61100000  |
| C                                          | 6.93600000  | 8.25100000  | 7.97000000  |
| C                                          | 6.42300000  | 8.32700000  | 6.52700000  |
| C                                          | 10.90400000 | 6.51900000  | 8.01000000  |
| C                                          | 11.07300000 | 13.58300000 | 8.96100000  |
| C                                          | 9.24800000  | 15.35100000 | 9.04700000  |
| C                                          | 5.89200000  | 7.54200000  | 8.83400000  |
| C                                          | 5.48700000  | 8.12000000  | 10.04300000 |
| C                                          | 10.30700000 | 3.38400000  | 7.61300000  |
| C                                          | 7.88600000  | 3.05200000  | 9.34600000  |
| C                                          | 4.96400000  | 17.06600000 | 9.61900000  |
| C                                          | 9.04400000  | 3.70800000  | 9.78600000  |
| C                                          | 5.32700000  | 9.16300000  | 6.25400000  |
| C                                          | 7.12800000  | 15.08000000 | 7.96400000  |

|   |             |             |             |
|---|-------------|-------------|-------------|
| C | 6.56900000  | 13.07400000 | 6.53500000  |
| C | 12.74200000 | 15.25400000 | 9.98200000  |
| C | 6.83100000  | 13.42000000 | 5.06500000  |
| C | 7.44000000  | 18.32800000 | 8.35400000  |
| C | 6.24500000  | 16.97400000 | 10.18300000 |
| C | 5.09700000  | 13.23500000 | 6.92800000  |
| C | 8.77200000  | 13.31800000 | 7.85100000  |
| C | 10.76500000 | 7.85500000  | 7.62600000  |
| C | 6.96400000  | 2.54000000  | 10.26200000 |
| C | 10.07500000 | 4.29000000  | 8.82300000  |
| C | 7.50900000  | 13.82600000 | 7.47700000  |
| C | 5.27800000  | 6.34600000  | 8.42800000  |
| C | 12.11200000 | 8.45400000  | 5.55400000  |
| C | 11.71200000 | 7.30100000  | 4.86600000  |
| C | 6.62000000  | 12.43900000 | 4.08300000  |
| C | 13.28500000 | 15.92200000 | 11.08400000 |
| C | 3.82600000  | 16.79700000 | 10.38300000 |
| C | 12.01500000 | 13.53900000 | 7.76000000  |
| C | 6.35400000  | 16.61700000 | 11.53500000 |
| C | 4.75600000  | 9.20500000  | 4.98300000  |
| C | 4.30600000  | 5.73500000  | 9.22100000  |
| C | 6.85500000  | 19.54800000 | 8.73400000  |
| C | 13.27700000 | 8.23900000  | 7.79900000  |
| C | 4.50100000  | 7.52000000  | 10.83000000 |
| C | 13.50500000 | 8.76200000  | 9.08100000  |
| C | 9.25800000  | 3.82700000  | 11.16700000 |
| C | 12.69500000 | 9.50000000  | 4.82100000  |
| C | 4.66500000  | 12.70800000 | 8.15800000  |
| C | 5.21800000  | 16.35600000 | 12.30400000 |
| C | 14.25300000 | 7.40500000  | 7.23800000  |
| C | 3.94800000  | 16.44200000 | 11.72800000 |

|   |             |             |             |
|---|-------------|-------------|-------------|
| C | 11.97900000 | 8.60500000  | 7.07300000  |
| C | 11.21000000 | 14.09400000 | 11.43900000 |
| C | 14.67300000 | 8.46400000  | 9.78200000  |
| C | 7.18800000  | 2.66600000  | 11.63400000 |
| C | 6.84100000  | 20.64000000 | 7.86700000  |
| C | 12.79600000 | 15.67500000 | 12.36800000 |
| C | 9.47900000  | 8.44000000  | 7.69600000  |
| C | 3.91100000  | 6.32100000  | 10.42600000 |
| C | 7.25300000  | 14.69100000 | 4.65100000  |
| C | 11.19500000 | 2.30400000  | 7.73300000  |
| C | 13.10100000 | 12.65000000 | 7.77700000  |
| C | 4.16000000  | 13.87400000 | 6.10800000  |
| C | 11.75400000 | 14.75800000 | 12.53900000 |
| C | 6.93800000  | 7.54400000  | 5.48700000  |
| C | 8.34200000  | 3.31000000  | 12.08400000 |
| C | 7.41300000  | 20.53900000 | 6.59600000  |
| C | 8.01500000  | 18.24200000 | 7.08000000  |
| C | 11.88500000 | 14.40600000 | 6.66700000  |
| C | 2.82100000  | 13.98200000 | 6.50100000  |
| C | 9.63800000  | 3.56300000  | 6.39400000  |
| C | 15.42300000 | 7.10100000  | 7.94000000  |
| C | 11.89400000 | 7.19400000  | 3.48300000  |
| C | 5.27300000  | 8.41000000  | 3.95400000  |
| C | 12.87500000 | 9.39600000  | 3.44100000  |
| C | 14.03300000 | 12.63000000 | 6.73900000  |
| C | 6.82500000  | 12.71800000 | 2.73100000  |
| C | 3.33000000  | 12.81000000 | 8.54700000  |
| C | 12.47500000 | 8.23900000  | 2.76500000  |
| C | 9.84300000  | 2.67900000  | 5.32900000  |
| C | 2.40000000  | 13.44700000 | 7.71800000  |
| C | 15.64000000 | 7.62900000  | 9.21300000  |

|   |             |             |             |
|---|-------------|-------------|-------------|
| C | 13.89300000 | 13.50300000 | 5.65500000  |
| C | 7.45900000  | 14.97300000 | 3.29700000  |
| C | 12.81400000 | 14.38800000 | 5.62200000  |
| C | 8.00100000  | 19.33500000 | 6.20700000  |
| C | 7.24700000  | 13.98900000 | 2.33100000  |
| C | 6.36800000  | 7.58400000  | 4.21000000  |
| C | 10.72700000 | 1.60700000  | 5.46400000  |
| C | 11.40600000 | 1.42400000  | 6.67200000  |
| C | 10.54000000 | 9.32100000  | 12.21000000 |
| C | 10.79900000 | 8.02400000  | 12.68600000 |
| C | 9.75400000  | 7.20000000  | 13.10500000 |
| C | 8.45100000  | 7.69600000  | 13.16000000 |
| C | 8.14500000  | 8.99200000  | 12.70800000 |
| C | 9.18300000  | 9.69800000  | 12.07100000 |
| C | 6.78400000  | 9.58300000  | 12.95800000 |
| C | 11.68100000 | 10.28700000 | 11.97900000 |
| H | 7.69600000  | 5.75600000  | 8.78500000  |
| H | 9.41900000  | 12.40800000 | 5.32000000  |
| H | 9.66800000  | 9.64500000  | 5.19600000  |
| H | 8.30300000  | 17.46600000 | 10.08400000 |
| H | 6.98700000  | 9.28600000  | 8.34600000  |
| H | 11.90100000 | 6.07000000  | 7.98200000  |
| H | 10.94000000 | 12.53800000 | 9.29900000  |
| H | 9.92600000  | 15.94600000 | 9.66000000  |
| H | 5.94700000  | 9.05600000  | 10.36600000 |
| H | 7.71100000  | 2.92200000  | 8.27600000  |
| H | 4.85200000  | 17.35900000 | 8.57300000  |
| H | 4.90600000  | 9.77600000  | 7.05500000  |
| H | 6.12500000  | 15.44200000 | 7.73100000  |
| H | 6.78500000  | 11.99700000 | 6.63700000  |
| H | 13.14200000 | 15.45300000 | 8.98600000  |

|   |             |             |             |
|---|-------------|-------------|-------------|
| H | 6.06700000  | 2.03300000  | 9.90000000  |
| H | 11.03000000 | 4.29900000  | 9.37600000  |
| H | 5.55000000  | 5.89600000  | 7.47000000  |
| H | 11.25100000 | 6.47400000  | 5.41000000  |
| H | 6.29600000  | 11.44000000 | 4.38500000  |
| H | 14.09700000 | 16.63700000 | 10.93500000 |
| H | 2.83900000  | 16.86400000 | 9.92200000  |
| H | 7.34500000  | 16.53100000 | 11.98800000 |
| H | 3.90200000  | 9.86000000  | 4.79700000  |
| H | 3.84600000  | 4.80100000  | 8.89100000  |
| H | 6.40300000  | 19.64000000 | 9.72400000  |
| H | 4.18900000  | 7.99700000  | 11.76200000 |
| H | 12.75200000 | 9.40900000  | 9.53400000  |
| H | 10.15800000 | 4.33400000  | 11.52500000 |
| H | 13.00300000 | 10.41100000 | 5.34000000  |
| H | 5.39000000  | 12.23400000 | 8.82600000  |
| H | 5.32800000  | 16.07800000 | 13.35400000 |
| H | 14.10600000 | 6.99800000  | 6.23500000  |
| H | 3.05900000  | 16.23200000 | 12.32500000 |
| H | 11.82000000 | 9.68000000  | 7.26300000  |
| H | 10.37600000 | 13.40000000 | 11.57900000 |
| H | 14.83500000 | 8.89000000  | 10.77500000 |
| H | 6.47100000  | 2.25700000  | 12.34900000 |
| H | 6.38400000  | 21.57800000 | 8.18900000  |
| H | 13.22300000 | 16.19200000 | 13.22900000 |
| H | 3.14200000  | 5.85100000  | 11.04200000 |
| H | 7.42700000  | 15.47200000 | 5.39400000  |
| H | 11.72400000 | 2.15100000  | 8.67700000  |
| H | 13.22700000 | 11.97400000 | 8.62700000  |
| H | 4.47300000  | 14.29000000 | 5.14900000  |
| H | 11.35900000 | 14.55800000 | 13.53700000 |

|   |             |             |             |
|---|-------------|-------------|-------------|
| H | 7.79300000  | 6.89000000  | 5.67400000  |
| H | 8.53400000  | 3.40700000  | 13.15600000 |
| H | 7.40700000  | 21.39500000 | 5.91800000  |
| H | 8.49100000  | 17.31100000 | 6.76700000  |
| H | 11.04900000 | 15.10900000 | 6.63500000  |
| H | 2.10700000  | 14.48700000 | 5.84600000  |
| H | 8.95100000  | 4.40400000  | 6.27300000  |
| H | 16.17300000 | 6.45200000  | 7.48200000  |
| H | 11.57800000 | 6.28400000  | 2.96800000  |
| H | 4.82300000  | 8.43700000  | 2.95900000  |
| H | 13.32400000 | 10.22600000 | 2.89200000  |
| H | 14.87300000 | 11.93300000 | 6.77900000  |
| H | 6.65900000  | 11.93500000 | 1.98700000  |
| H | 3.01500000  | 12.39400000 | 9.50600000  |
| H | 12.61300000 | 8.15700000  | 1.68500000  |
| H | 9.31000000  | 2.83300000  | 4.38900000  |
| H | 1.35500000  | 13.52600000 | 8.02300000  |
| H | 16.55900000 | 7.39900000  | 9.75600000  |
| H | 14.62200000 | 13.49200000 | 4.84200000  |
| H | 7.78800000  | 15.97100000 | 2.99900000  |
| H | 12.69500000 | 15.07500000 | 4.78100000  |
| H | 8.45900000  | 19.24300000 | 5.21900000  |
| H | 7.41200000  | 14.20800000 | 1.27400000  |
| H | 6.78100000  | 6.96100000  | 3.41400000  |
| H | 10.89000000 | 0.91900000  | 4.63200000  |
| H | 12.10200000 | 0.59100000  | 6.78800000  |
| H | 11.83500000 | 7.67600000  | 12.73800000 |
| H | 7.64200000  | 7.07000000  | 13.54700000 |
| H | 6.01500000  | 8.80000000  | 13.02300000 |
| H | 6.51100000  | 10.33000000 | 12.20200000 |
| H | 6.79300000  | 10.11600000 | 13.92500000 |

|                                            |             |             |             |
|--------------------------------------------|-------------|-------------|-------------|
| H                                          | 12.63200000 | 9.75200000  | 11.85000000 |
| H                                          | 11.78900000 | 10.94500000 | 12.85600000 |
| H                                          | 11.52300000 | 10.95100000 | 11.11700000 |
| H                                          | 9.96000000  | 6.17900000  | 13.43100000 |
| Cl                                         | 8.28500000  | 11.35000000 | 12.35600000 |
| IM2-IPr <sup>#</sup> (IM2-L <sub>A</sub> ) |             |             |             |
| Pd                                         | 8.95200000  | 10.51000000 | 10.28800000 |
| N                                          | 9.07300000  | 11.96600000 | 7.38400000  |
| N                                          | 9.33600000  | 9.82400000  | 7.28700000  |
| C                                          | 8.57500000  | 6.35400000  | 8.46500000  |
| C                                          | 9.06800000  | 10.84000000 | 8.18100000  |
| C                                          | 8.37000000  | 7.68200000  | 8.06600000  |
| C                                          | 9.83600000  | 5.75400000  | 8.43100000  |
| C                                          | 11.57800000 | 14.22100000 | 10.21600000 |
| C                                          | 9.34500000  | 11.64900000 | 6.05500000  |
| C                                          | 7.97300000  | 15.86700000 | 8.68400000  |
| C                                          | 9.50100000  | 10.30300000 | 5.99100000  |
| C                                          | 7.52700000  | 17.19300000 | 9.29500000  |
| C                                          | 9.62700000  | 14.06300000 | 8.58800000  |
| C                                          | 6.95300000  | 8.26000000  | 7.99500000  |
| C                                          | 6.41300000  | 8.32600000  | 6.56300000  |
| C                                          | 10.91700000 | 6.51600000  | 7.97900000  |
| C                                          | 11.00400000 | 13.53000000 | 8.97400000  |
| C                                          | 9.22300000  | 15.33400000 | 9.00700000  |
| C                                          | 5.93000000  | 7.56400000  | 8.89500000  |
| C                                          | 5.60500000  | 8.12200000  | 10.13800000 |
| C                                          | 10.33300000 | 3.39100000  | 7.62100000  |
| C                                          | 7.86900000  | 3.12400000  | 9.33500000  |
| C                                          | 4.97700000  | 17.04700000 | 9.58300000  |
| C                                          | 9.06000000  | 3.71100000  | 9.78600000  |
| C                                          | 5.33300000  | 9.18600000  | 6.30600000  |

|   |             |             |             |
|---|-------------|-------------|-------------|
| C | 7.13400000  | 15.12000000 | 7.85500000  |
| C | 6.55300000  | 13.11500000 | 6.43400000  |
| C | 12.65100000 | 15.11900000 | 10.15300000 |
| C | 6.82600000  | 13.45600000 | 4.96500000  |
| C | 7.43200000  | 18.36000000 | 8.31100000  |
| C | 6.26600000  | 16.97200000 | 10.13200000 |
| C | 5.08000000  | 13.28800000 | 6.82500000  |
| C | 8.73100000  | 13.31000000 | 7.80100000  |
| C | 10.78000000 | 7.84700000  | 7.57400000  |
| C | 6.95000000  | 2.58600000  | 10.23800000 |
| C | 10.09500000 | 4.29900000  | 8.83000000  |
| C | 7.49300000  | 13.85100000 | 7.38700000  |
| C | 5.26400000  | 6.39500000  | 8.49400000  |
| C | 12.12900000 | 8.44700000  | 5.49000000  |
| C | 11.73200000 | 7.29500000  | 4.79900000  |
| C | 6.61600000  | 12.47100000 | 3.98500000  |
| C | 13.13100000 | 15.74300000 | 11.30900000 |
| C | 3.85300000  | 16.76900000 | 10.36300000 |
| C | 11.99100000 | 13.52600000 | 7.81100000  |
| C | 6.39700000  | 16.62200000 | 11.48300000 |
| C | 4.74300000  | 9.23900000  | 5.04500000  |
| C | 4.32100000  | 5.78600000  | 9.32600000  |
| C | 6.81500000  | 19.55700000 | 8.71200000  |
| C | 13.29800000 | 8.21000000  | 7.73000000  |
| C | 4.64700000  | 7.52600000  | 10.96200000 |
| C | 13.52000000 | 8.72400000  | 9.01500000  |
| C | 9.30600000  | 3.73800000  | 11.16600000 |
| C | 12.70900000 | 9.49800000  | 4.76000000  |
| C | 4.65300000  | 12.78800000 | 8.06700000  |
| C | 5.27500000  | 16.35000000 | 12.26700000 |
| C | 14.27700000 | 7.37800000  | 7.17100000  |

|   |             |             |             |
|---|-------------|-------------|-------------|
| C | 3.99700000  | 16.42100000 | 11.70800000 |
| C | 11.99800000 | 8.58900000  | 7.01000000  |
| C | 10.99400000 | 13.96200000 | 11.46700000 |
| C | 14.68200000 | 8.42400000  | 9.72500000  |
| C | 7.21000000  | 2.61600000  | 11.61000000 |
| C | 6.78700000  | 20.67000000 | 7.87200000  |
| C | 12.55000000 | 15.47300000 | 12.54900000 |
| C | 9.49500000  | 8.43600000  | 7.65600000  |
| C | 4.01000000  | 6.35000000  | 10.56600000 |
| C | 7.25800000  | 14.72300000 | 4.54800000  |
| C | 11.23200000 | 2.32000000  | 7.73500000  |
| C | 13.08900000 | 12.65300000 | 7.85800000  |
| C | 4.13800000  | 13.90100000 | 5.98900000  |
| C | 11.47900000 | 14.57700000 | 12.62200000 |
| C | 6.89300000  | 7.52500000  | 5.51900000  |
| C | 8.39500000  | 3.19100000  | 12.07100000 |
| C | 7.37900000  | 20.61400000 | 6.60800000  |
| C | 8.02400000  | 18.31800000 | 7.04100000  |
| C | 11.88400000 | 14.40000000 | 6.72100000  |
| C | 2.80000000  | 14.01100000 | 6.38200000  |
| C | 9.65400000  | 3.56100000  | 6.40600000  |
| C | 15.44300000 | 7.07100000  | 7.88100000  |
| C | 11.91800000 | 7.19000000  | 3.41600000  |
| C | 5.22700000  | 8.43100000  | 4.01000000  |
| C | 12.89200000 | 9.39800000  | 3.38100000  |
| C | 14.05600000 | 12.65700000 | 6.85300000  |
| C | 6.82900000  | 12.74400000 | 2.63300000  |
| C | 3.31800000  | 12.89300000 | 8.45600000  |
| C | 12.49900000 | 8.24000000  | 2.70100000  |
| C | 9.85600000  | 2.67500000  | 5.34300000  |
| C | 2.38400000  | 13.50600000 | 7.61400000  |

|   |             |             |             |
|---|-------------|-------------|-------------|
| C | 15.65100000 | 7.59100000  | 9.15900000  |
| C | 13.94000000 | 13.53700000 | 5.77300000  |
| C | 7.47200000  | 14.99900000 | 3.19400000  |
| C | 12.84900000 | 14.40500000 | 5.70900000  |
| C | 7.99700000  | 19.43300000 | 6.19700000  |
| C | 7.25700000  | 14.01200000 | 2.23000000  |
| C | 6.30400000  | 7.57600000  | 4.25100000  |
| C | 10.74700000 | 1.60800000  | 5.47400000  |
| C | 11.43900000 | 1.43700000  | 6.67500000  |
| C | 10.54400000 | 9.30500000  | 12.16300000 |
| C | 10.85500000 | 8.09600000  | 12.80700000 |
| C | 9.85900000  | 7.34300000  | 13.43100000 |
| C | 8.55900000  | 7.84400000  | 13.50100000 |
| C | 8.20500000  | 9.05400000  | 12.87500000 |
| C | 9.18000000  | 9.68400000  | 12.07500000 |
| C | 6.83700000  | 9.64000000  | 13.11200000 |
| C | 11.67300000 | 10.21300000 | 11.71400000 |
| H | 7.71700000  | 5.78100000  | 8.82000000  |
| H | 9.39500000  | 12.40500000 | 5.28000000  |
| H | 9.71700000  | 9.65000000  | 5.15400000  |
| H | 8.32200000  | 17.47000000 | 10.01100000 |
| H | 7.01300000  | 9.29900000  | 8.35900000  |
| H | 11.91100000 | 6.06200000  | 7.94700000  |
| H | 10.85700000 | 12.47300000 | 9.26400000  |
| H | 9.89700000  | 15.91100000 | 9.64400000  |
| H | 6.11000000  | 9.03600000  | 10.45700000 |
| H | 7.66600000  | 3.06700000  | 8.26300000  |
| H | 4.84700000  | 17.33600000 | 8.53800000  |
| H | 4.94300000  | 9.81300000  | 7.11300000  |
| H | 6.15100000  | 15.51200000 | 7.58900000  |
| H | 6.75600000  | 12.03600000 | 6.53500000  |

|   |             |             |             |
|---|-------------|-------------|-------------|
| H | 13.12400000 | 15.33600000 | 9.19300000  |
| H | 6.02700000  | 2.13500000  | 9.86700000  |
| H | 11.04600000 | 4.31500000  | 9.38900000  |
| H | 5.46600000  | 5.96800000  | 7.50800000  |
| H | 11.27200000 | 6.46700000  | 5.34200000  |
| H | 6.28600000  | 11.47400000 | 4.28900000  |
| H | 13.96900000 | 16.44100000 | 11.23800000 |
| H | 2.85900000  | 16.82200000 | 9.91400000  |
| H | 7.39600000  | 16.55000000 | 11.92200000 |
| H | 3.90500000  | 9.91700000  | 4.87100000  |
| H | 3.81600000  | 4.87400000  | 8.99800000  |
| H | 6.34800000  | 19.61400000 | 9.69700000  |
| H | 4.39800000  | 7.97900000  | 11.92500000 |
| H | 12.76400000 | 9.37000000  | 9.46100000  |
| H | 10.23000000 | 4.19100000  | 11.53500000 |
| H | 13.01300000 | 10.41000000 | 5.28000000  |
| H | 5.38000000  | 12.33100000 | 8.74400000  |
| H | 5.40300000  | 16.07700000 | 13.31700000 |
| H | 14.13900000 | 6.97400000  | 6.16600000  |
| H | 3.11700000  | 16.20300000 | 12.31700000 |
| H | 11.84800000 | 9.66300000  | 7.20900000  |
| H | 10.13700000 | 13.28700000 | 11.53100000 |
| H | 14.83200000 | 8.84700000  | 10.72100000 |
| H | 6.49500000  | 2.18600000  | 12.31400000 |
| H | 6.30300000  | 21.58800000 | 8.21000000  |
| H | 12.92800000 | 15.95800000 | 13.45200000 |
| H | 3.27300000  | 5.87900000  | 11.22000000 |
| H | 7.43300000  | 15.50500000 | 5.28900000  |
| H | 11.77300000 | 2.17300000  | 8.67500000  |
| H | 13.19300000 | 11.97200000 | 8.70800000  |
| H | 4.44700000  | 14.29200000 | 5.01800000  |

|   |             |             |             |
|---|-------------|-------------|-------------|
| H | 11.01300000 | 14.35900000 | 13.58600000 |
| H | 7.73600000  | 6.85100000  | 5.69400000  |
| H | 8.61400000  | 3.21400000  | 13.14000000 |
| H | 7.36500000  | 21.48600000 | 5.95100000  |
| H | 8.52300000  | 17.40400000 | 6.71100000  |
| H | 11.03700000 | 15.08800000 | 6.66200000  |
| H | 2.08100000  | 14.49700000 | 5.71800000  |
| H | 8.96100000  | 4.39800000  | 6.28800000  |
| H | 16.19600000 | 6.42500000  | 7.42500000  |
| H | 11.60500000 | 6.28100000  | 2.89900000  |
| H | 4.76500000  | 8.46900000  | 3.02300000  |
| H | 13.33900000 | 10.23000000 | 2.83200000  |
| H | 14.90500000 | 11.97300000 | 6.92000000  |
| H | 6.66300000  | 11.95900000 | 1.89000000  |
| H | 3.00600000  | 12.49700000 | 9.42500000  |
| H | 12.64200000 | 8.15800000  | 1.62200000  |
| H | 9.31200000  | 2.82100000  | 4.40800000  |
| H | 1.33900000  | 13.59200000 | 7.92100000  |
| H | 16.56600000 | 7.35800000  | 9.70800000  |
| H | 14.69900000 | 13.54600000 | 4.98700000  |
| H | 7.81000000  | 15.99300000 | 2.89400000  |
| H | 12.75000000 | 15.09700000 | 4.87000000  |
| H | 8.46800000  | 19.37400000 | 5.21300000  |
| H | 7.42500000  | 14.22800000 | 1.17300000  |
| H | 6.69000000  | 6.94200000  | 3.45000000  |
| H | 10.90700000 | 0.91700000  | 4.64400000  |
| H | 12.14400000 | 0.61000000  | 6.78800000  |
| H | 11.89900000 | 7.76600000  | 12.83600000 |
| H | 7.78800000  | 7.30600000  | 14.06200000 |
| H | 6.04500000  | 9.02900000  | 12.65500000 |
| H | 6.76700000  | 10.65600000 | 12.70700000 |

|                                            |             |             |             |
|--------------------------------------------|-------------|-------------|-------------|
| H                                          | 6.62900000  | 9.67400000  | 14.19400000 |
| H                                          | 12.60800000 | 9.64600000  | 11.60800000 |
| H                                          | 11.84300000 | 10.99700000 | 12.46900000 |
| H                                          | 11.47600000 | 10.74500000 | 10.77100000 |
| H                                          | 10.11100000 | 6.39100000  | 13.90600000 |
| Cl                                         | 7.58700000  | 12.25200000 | 10.91400000 |
| aniline                                    |             |             |             |
| C                                          | 13.31700000 | 12.33300000 | 17.41000000 |
| C                                          | 13.31900000 | 11.12800000 | 16.70900000 |
| C                                          | 13.29900000 | 9.90500000  | 17.38500000 |
| C                                          | 13.27800000 | 9.90800000  | 18.78500000 |
| C                                          | 13.27400000 | 11.10600000 | 19.49700000 |
| C                                          | 13.29400000 | 12.34200000 | 18.81900000 |
| H                                          | 13.25500000 | 11.09500000 | 20.59000000 |
| H                                          | 13.32900000 | 13.28400000 | 16.86900000 |
| H                                          | 13.33400000 | 11.15100000 | 15.61600000 |
| H                                          | 13.26400000 | 8.96300000  | 19.33400000 |
| H                                          | 13.30100000 | 8.96400000  | 16.83300000 |
| H                                          | 13.30300000 | 14.42100000 | 19.05500000 |
| H                                          | 13.29500000 | 13.52200000 | 20.53500000 |
| N                                          | 13.29000000 | 13.52700000 | 19.52400000 |
| IM3-IPr <sup>#</sup> (IM3-L <sub>A</sub> ) |             |             |             |
| Pd                                         | 8.83300000  | 10.16600000 | 10.06500000 |
| N                                          | 9.11900000  | 11.95600000 | 7.31900000  |
| N                                          | 9.36000000  | 9.82000000  | 7.08600000  |
| N                                          | 9.63800000  | 11.75000000 | 10.72400000 |
| C                                          | 8.54300000  | 6.32300000  | 8.14900000  |
| C                                          | 9.08100000  | 10.78100000 | 8.03700000  |
| C                                          | 8.35300000  | 7.65700000  | 7.75700000  |
| C                                          | 9.80000000  | 5.71800000  | 8.14300000  |
| C                                          | 11.73000000 | 14.42900000 | 9.94100000  |

|   |             |             |             |
|---|-------------|-------------|-------------|
| C | 9.41900000  | 11.72000000 | 5.97900000  |
| C | 7.94300000  | 15.83900000 | 8.62800000  |
| C | 9.56200000  | 10.38000000 | 5.82900000  |
| C | 7.50200000  | 17.18600000 | 9.20000000  |
| C | 9.65200000  | 14.08300000 | 8.50000000  |
| C | 6.93600000  | 8.22800000  | 7.63100000  |
| C | 6.46000000  | 8.31800000  | 6.17800000  |
| C | 10.89300000 | 6.47300000  | 7.70300000  |
| C | 11.07000000 | 13.61000000 | 8.82300000  |
| C | 9.22700000  | 15.35800000 | 8.89400000  |
| C | 5.88100000  | 7.49900000  | 8.46600000  |
| C | 5.50400000  | 8.01500000  | 9.71200000  |
| C | 10.30600000 | 3.34700000  | 7.36700000  |
| C | 7.81000000  | 3.13100000  | 9.06700000  |
| C | 4.95000000  | 17.12300000 | 9.47300000  |
| C | 9.01900000  | 3.68200000  | 9.51600000  |
| C | 5.32100000  | 9.09200000  | 5.90100000  |
| C | 7.08500000  | 15.03300000 | 7.87800000  |
| C | 6.53700000  | 12.99900000 | 6.48800000  |
| C | 12.90100000 | 15.17400000 | 9.74000000  |
| C | 6.79700000  | 13.33600000 | 5.01600000  |
| C | 7.42400000  | 18.33300000 | 8.19000000  |
| C | 6.23100000  | 17.00700000 | 10.03100000 |
| C | 5.06700000  | 13.15300000 | 6.88800000  |
| C | 8.74500000  | 13.28000000 | 7.77800000  |
| C | 10.77500000 | 7.80900000  | 7.31600000  |
| C | 6.89400000  | 2.58800000  | 9.97000000  |
| C | 10.05200000 | 4.27000000  | 8.55900000  |
| C | 7.47300000  | 13.77100000 | 7.41500000  |
| C | 5.23500000  | 6.34200000  | 8.00000000  |
| C | 12.11000000 | 8.41500000  | 5.23500000  |

|   |             |             |             |
|---|-------------|-------------|-------------|
| C | 11.65600000 | 7.29200000  | 4.53000000  |
| C | 6.64500000  | 12.33500000 | 4.04500000  |
| C | 13.46500000 | 15.92100000 | 10.78100000 |
| C | 3.81200000  | 16.87100000 | 10.24300000 |
| C | 11.95300000 | 13.53700000 | 7.58000000  |
| C | 6.34200000  | 16.65200000 | 11.38300000 |
| C | 4.78900000  | 9.15100000  | 4.61300000  |
| C | 4.25200000  | 5.71500000  | 8.76600000  |
| C | 6.95500000  | 19.58700000 | 8.61900000  |
| C | 13.31700000 | 8.16100000  | 7.43700000  |
| C | 4.51200000  | 7.39600000  | 10.47700000 |
| C | 13.76000000 | 8.89000000  | 8.55000000  |
| C | 9.28700000  | 3.66700000  | 10.89200000 |
| C | 12.73300000 | 9.44700000  | 4.51700000  |
| C | 4.64900000  | 12.64600000 | 8.13000000  |
| C | 5.20700000  | 16.40800000 | 12.15700000 |
| C | 14.12600000 | 7.11600000  | 6.96600000  |
| C | 3.93600000  | 16.51300000 | 11.58700000 |
| C | 11.99800000 | 8.54600000  | 6.76100000  |
| C | 11.14100000 | 14.45100000 | 11.21600000 |
| C | 14.96900000 | 8.58700000  | 9.18000000  |
| C | 7.17700000  | 2.57200000  | 11.33800000 |
| C | 6.94000000  | 20.68300000 | 7.75800000  |
| C | 12.87000000 | 15.93300000 | 12.04200000 |
| C | 9.49500000  | 8.41400000  | 7.39500000  |
| C | 3.88400000  | 6.24100000  | 10.00700000 |
| C | 7.17500000  | 14.61700000 | 4.59100000  |
| C | 11.17500000 | 2.25800000  | 7.53100000  |
| C | 13.01700000 | 12.62400000 | 7.54600000  |
| C | 4.11900000  | 13.77200000 | 6.06500000  |
| C | 11.70400000 | 15.19100000 | 12.25700000 |

|   |             |             |             |
|---|-------------|-------------|-------------|
| C | 7.05700000  | 7.61200000  | 5.12700000  |
| C | 8.37900000  | 3.11400000  | 11.79700000 |
| C | 7.39000000  | 20.55000000 | 6.44100000  |
| C | 7.88000000  | 18.21500000 | 6.87200000  |
| C | 11.78700000 | 14.40700000 | 6.49400000  |
| C | 2.78200000  | 13.87600000 | 6.46500000  |
| C | 9.68000000  | 3.51900000  | 6.12500000  |
| C | 15.33300000 | 6.80500000  | 7.59700000  |
| C | 11.82500000 | 7.20300000  | 3.14400000  |
| C | 5.39000000  | 8.43500000  | 3.57100000  |
| C | 12.89800000 | 9.36300000  | 3.13500000  |
| C | 13.89300000 | 12.57900000 | 6.46200000  |
| C | 6.86500000  | 12.60300000 | 2.69300000  |
| C | 3.31600000  | 12.74400000 | 8.52800000  |
| C | 12.44300000 | 8.23800000  | 2.44100000  |
| C | 9.91500000  | 2.62300000  | 5.07700000  |
| C | 2.37400000  | 13.35700000 | 7.69400000  |
| C | 15.76000000 | 7.53900000  | 8.70600000  |
| C | 13.71600000 | 13.44900000 | 5.38300000  |
| C | 7.39700000  | 14.89000000 | 3.23700000  |
| C | 12.65800000 | 14.36200000 | 5.40300000  |
| C | 7.86100000  | 19.31300000 | 6.00300000  |
| C | 7.24400000  | 13.88400000 | 2.28200000  |
| C | 6.52700000  | 7.67000000  | 3.83200000  |
| C | 10.78300000 | 1.54300000  | 5.25400000  |
| C | 11.41500000 | 1.36400000  | 6.48800000  |
| C | 10.01300000 | 8.39400000  | 11.78000000 |
| C | 10.18800000 | 7.32700000  | 12.66800000 |
| C | 9.19200000  | 7.01400000  | 13.58900000 |
| C | 8.02200000  | 7.77100000  | 13.61800000 |
| C | 7.80800000  | 8.84700000  | 12.73500000 |

|   |             |             |             |
|---|-------------|-------------|-------------|
| C | 8.80800000  | 9.12700000  | 11.78200000 |
| C | 6.52800000  | 9.62600000  | 12.88200000 |
| C | 11.16200000 | 8.77000000  | 10.86800000 |
| C | 11.40800000 | 11.73500000 | 12.37600000 |
| C | 11.82400000 | 11.87500000 | 13.69600000 |
| C | 10.91900000 | 12.23000000 | 14.70100000 |
| C | 9.58000000  | 12.44100000 | 14.35600000 |
| C | 9.14700000  | 12.30500000 | 13.03800000 |
| C | 10.05800000 | 11.94500000 | 12.02300000 |
| H | 7.67400000  | 5.75200000  | 8.47800000  |
| H | 9.49000000  | 12.52500000 | 5.25900000  |
| H | 9.78200000  | 9.78500000  | 4.95100000  |
| H | 8.29300000  | 17.47500000 | 9.91500000  |
| H | 6.96800000  | 9.26000000  | 8.02100000  |
| H | 11.88100000 | 6.00800000  | 7.67400000  |
| H | 10.97400000 | 12.57900000 | 9.20900000  |
| H | 9.92000000  | 15.98500000 | 9.45800000  |
| H | 5.99300000  | 8.91900000  | 10.08300000 |
| H | 7.58900000  | 3.11000000  | 7.99700000  |
| H | 4.83900000  | 17.42000000 | 8.42800000  |
| H | 4.83900000  | 9.64900000  | 6.70900000  |
| H | 6.07300000  | 15.37500000 | 7.65800000  |
| H | 6.76200000  | 11.92500000 | 6.60000000  |
| H | 13.38600000 | 15.17500000 | 8.76300000  |
| H | 5.95500000  | 2.16800000  | 9.60200000  |
| H | 10.99900000 | 4.29000000  | 9.12600000  |
| H | 5.49200000  | 5.93700000  | 7.01800000  |
| H | 11.16200000 | 6.47700000  | 5.06300000  |
| H | 6.35800000  | 11.32800000 | 4.35500000  |
| H | 14.37700000 | 16.49400000 | 10.59900000 |
| H | 2.82300000  | 16.95600000 | 9.78800000  |

|   |             |             |             |
|---|-------------|-------------|-------------|
| H | 7.33500000  | 16.55400000 | 11.83200000 |
| H | 3.90400000  | 9.76100000  | 4.42200000  |
| H | 3.76600000  | 4.81400000  | 8.38700000  |
| H | 6.59900000  | 19.70200000 | 9.64500000  |
| H | 4.22900000  | 7.82400000  | 11.44100000 |
| H | 13.15000000 | 9.71400000  | 8.92500000  |
| H | 10.22400000 | 4.09400000  | 11.25900000 |
| H | 13.08200000 | 10.33400000 | 5.05100000  |
| H | 5.38300000  | 12.19000000 | 8.80200000  |
| H | 5.31800000  | 16.13200000 | 13.20900000 |
| H | 13.82500000 | 6.55400000  | 6.08000000  |
| H | 3.04600000  | 16.31700000 | 12.18900000 |
| H | 11.85900000 | 9.62000000  | 6.96500000  |
| H | 10.21100000 | 13.90200000 | 11.38600000 |
| H | 15.29700000 | 9.17800000  | 10.03700000 |
| H | 6.46800000  | 2.13300000  | 12.04200000 |
| H | 6.58100000  | 21.64900000 | 8.12000000  |
| H | 13.31100000 | 16.51400000 | 12.85400000 |
| H | 3.10600000  | 5.75800000  | 10.60100000 |
| H | 7.30300000  | 15.41500000 | 5.32500000  |
| H | 11.66700000 | 2.10700000  | 8.49700000  |
| H | 13.17000000 | 11.95300000 | 8.39600000  |
| H | 4.42300000  | 14.17600000 | 5.09700000  |
| H | 11.23200000 | 15.18200000 | 13.24100000 |
| H | 7.94600000  | 7.00600000  | 5.31500000  |
| H | 8.61600000  | 3.10300000  | 12.86300000 |
| H | 7.38300000  | 21.40900000 | 5.76700000  |
| H | 8.26700000  | 17.25700000 | 6.51900000  |
| H | 10.96800000 | 15.13100000 | 6.50300000  |
| H | 2.05900000  | 14.36300000 | 5.80600000  |
| H | 9.00700000  | 4.36500000  | 5.97000000  |

|   |             |             |             |
|---|-------------|-------------|-------------|
| H | 15.95100000 | 5.99100000  | 7.21000000  |
| H | 11.46700000 | 6.31800000  | 2.61400000  |
| H | 4.97400000  | 8.47900000  | 2.56300000  |
| H | 13.37900000 | 10.18200000 | 2.59700000  |
| H | 14.71900000 | 11.86400000 | 6.46500000  |
| H | 6.74500000  | 11.80300000 | 1.96000000  |
| H | 3.01100000  | 12.34300000 | 9.49700000  |
| H | 12.56700000 | 8.17100000  | 1.35800000  |
| H | 9.41700000  | 2.77100000  | 4.11700000  |
| H | 1.32900000  | 13.43000000 | 8.00200000  |
| H | 16.71100000 | 7.30500000  | 9.18900000  |
| H | 14.40100000 | 13.41800000 | 4.53400000  |
| H | 7.69100000  | 15.89500000 | 2.93200000  |
| H | 12.51400000 | 15.04900000 | 4.56700000  |
| H | 8.22100000  | 19.19600000 | 4.97800000  |
| H | 7.42200000  | 14.09400000 | 1.22500000  |
| H | 7.00700000  | 7.11000000  | 3.02700000  |
| H | 10.97000000 | 0.84700000  | 4.43500000  |
| H | 12.09500000 | 0.52400000  | 6.64000000  |
| H | 11.11900000 | 6.75200000  | 12.63200000 |
| H | 7.24000000  | 7.53000000  | 14.34300000 |
| H | 5.73500000  | 8.98900000  | 13.30400000 |
| H | 6.18600000  | 10.05700000 | 11.93400000 |
| H | 6.67100000  | 10.47800000 | 13.56600000 |
| H | 11.62000000 | 7.88400000  | 10.40600000 |
| H | 11.94000000 | 9.30800000  | 11.43900000 |
| H | 10.88100000 | 9.44900000  | 10.03300000 |
| H | 9.33000000  | 6.19100000  | 14.29200000 |
| H | 8.09700000  | 12.46800000 | 12.78300000 |
| H | 12.12700000 | 11.46700000 | 11.59800000 |
| H | 12.87500000 | 11.70900000 | 13.94300000 |

|                     |             |             |             |
|---------------------|-------------|-------------|-------------|
| H                   | 8.85800000  | 12.71700000 | 15.12800000 |
| H                   | 11.24800000 | 12.32900000 | 15.73400000 |
| H                   | 10.34400000 | 11.83400000 | 10.00000000 |
| H                   | 8.73500000  | 12.11800000 | 10.42800000 |
| Cl                  | 7.13500000  | 11.66000000 | 10.88500000 |
| NaO <sup>t</sup> Bu |             |             |             |
| O                   | 8.30700000  | 11.39200000 | 14.17000000 |
| C                   | 8.39800000  | 11.25400000 | 12.79000000 |
| C                   | 7.17300000  | 10.49100000 | 12.23800000 |
| C                   | 8.47800000  | 12.63900000 | 12.10900000 |
| C                   | 9.67600000  | 10.45700000 | 12.44000000 |
| H                   | 6.25000000  | 11.05800000 | 12.45600000 |
| H                   | 7.22100000  | 10.33000000 | 11.14700000 |
| H                   | 7.09500000  | 9.51000000  | 12.73200000 |
| H                   | 9.33300000  | 13.20300000 | 12.51500000 |
| H                   | 7.55900000  | 13.21400000 | 12.31900000 |
| H                   | 8.59300000  | 12.57400000 | 11.01300000 |
| H                   | 9.63000000  | 9.46900000  | 12.92400000 |
| H                   | 9.80700000  | 10.31300000 | 11.35300000 |
| H                   | 10.55500000 | 10.98900000 | 12.83500000 |
| Na                  | 7.03600000  | 12.27400000 | 15.47300000 |
| <sup>t</sup> BuOH   |             |             |             |
| O                   | 8.50400000  | 11.26100000 | 14.22300000 |
| C                   | 8.45900000  | 11.21000000 | 12.77300000 |
| C                   | 7.18800000  | 10.47900000 | 12.33100000 |
| C                   | 8.49900000  | 12.63600000 | 12.21400000 |
| C                   | 9.70500000  | 10.43200000 | 12.36500000 |
| H                   | 6.29200000  | 11.02900000 | 12.66000000 |
| H                   | 7.13200000  | 10.37800000 | 11.23600000 |
| H                   | 7.15900000  | 9.47400000  | 12.77700000 |
| H                   | 9.39700000  | 13.15700000 | 12.57400000 |

|                                            |             |             |             |
|--------------------------------------------|-------------|-------------|-------------|
| H                                          | 7.61500000  | 13.20600000 | 12.54100000 |
| H                                          | 8.50900000  | 12.64500000 | 11.11300000 |
| H                                          | 9.68900000  | 9.42400000  | 12.80400000 |
| H                                          | 9.75600000  | 10.34000000 | 11.27000000 |
| H                                          | 10.61100000 | 10.94500000 | 12.71900000 |
| H                                          | 7.72000000  | 11.75400000 | 14.52700000 |
| IM4-IPr <sup>#</sup> (IM4-L <sub>A</sub> ) |             |             |             |
| Pd                                         | 9.42000000  | 11.03800000 | 10.62400000 |
| N                                          | 9.08900000  | 11.96100000 | 7.78200000  |
| N                                          | 9.42700000  | 9.81900000  | 7.67800000  |
| N                                          | 10.13600000 | 11.71700000 | 12.37600000 |
| C                                          | 8.63000000  | 6.28100000  | 8.59900000  |
| C                                          | 9.18300000  | 10.83000000 | 8.59800000  |
| C                                          | 8.44400000  | 7.63000000  | 8.26800000  |
| C                                          | 9.88600000  | 5.67600000  | 8.56300000  |
| C                                          | 11.69000000 | 14.58400000 | 10.32500000 |
| C                                          | 9.29900000  | 11.64600000 | 6.44100000  |
| C                                          | 7.91600000  | 15.92800000 | 8.87900000  |
| C                                          | 9.49400000  | 10.30900000 | 6.37600000  |
| C                                          | 7.47800000  | 17.30800000 | 9.36300000  |
| C                                          | 9.58600000  | 14.12900000 | 8.91900000  |
| C                                          | 7.03000000  | 8.19900000  | 8.10700000  |
| C                                          | 6.62000000  | 8.32500000  | 6.63000000  |
| C                                          | 10.97800000 | 6.44500000  | 8.15100000  |
| C                                          | 11.01700000 | 13.70800000 | 9.25900000  |
| C                                          | 9.15800000  | 15.41800000 | 9.26000000  |
| C                                          | 5.90900000  | 7.43900000  | 8.82200000  |
| C                                          | 5.25100000  | 8.03200000  | 9.90600000  |
| C                                          | 10.31900000 | 3.34600000  | 7.63100000  |
| C                                          | 7.93400000  | 2.88200000  | 9.33100000  |
| C                                          | 4.91700000  | 17.30200000 | 9.58300000  |

|   |             |             |             |
|---|-------------|-------------|-------------|
| C | 9.03700000  | 3.60500000  | 9.80400000  |
| C | 5.49100000  | 9.10100000  | 6.31800000  |
| C | 7.09800000  | 15.12000000 | 8.08300000  |
| C | 6.57600000  | 13.07300000 | 6.71000000  |
| C | 12.83600000 | 15.34700000 | 10.05500000 |
| C | 6.91000000  | 13.39900000 | 5.24900000  |
| C | 7.41500000  | 18.40400000 | 8.29600000  |
| C | 6.18700000  | 17.16400000 | 10.16900000 |
| C | 5.08500000  | 13.26300000 | 7.01100000  |
| C | 8.70700000  | 13.30100000 | 8.17400000  |
| C | 10.86200000 | 7.79700000  | 7.81300000  |
| C | 6.97500000  | 2.38500000  | 10.21900000 |
| C | 10.10300000 | 4.19600000  | 8.88100000  |
| C | 7.47600000  | 13.82400000 | 7.69600000  |
| C | 5.44300000  | 6.19500000  | 8.36300000  |
| C | 11.99300000 | 8.41500000  | 5.62500000  |
| C | 11.45900000 | 7.30500000  | 4.95700000  |
| C | 6.72100000  | 12.40000000 | 4.28200000  |
| C | 13.44300000 | 16.11100000 | 11.05800000 |
| C | 3.75600000  | 17.08400000 | 10.33400000 |
| C | 11.86200000 | 13.59300000 | 7.99500000  |
| C | 6.26200000  | 16.81800000 | 11.52900000 |
| C | 5.00500000  | 9.17000000  | 5.01300000  |
| C | 4.38900000  | 5.54400000  | 9.00400000  |
| C | 6.91800000  | 19.66900000 | 8.65600000  |
| C | 13.45500000 | 8.08200000  | 7.60400000  |
| C | 4.18900000  | 7.38700000  | 10.54600000 |
| C | 14.22400000 | 8.92700000  | 8.41700000  |
| C | 9.15900000  | 3.80800000  | 11.18600000 |
| C | 12.56500000 | 9.44300000  | 4.86100000  |
| C | 4.53400000  | 12.61500000 | 8.13000000  |

|   |             |             |             |
|---|-------------|-------------|-------------|
| C | 5.10400000  | 16.60800000 | 12.28400000 |
| C | 14.05200000 | 6.89100000  | 7.15800000  |
| C | 3.84500000  | 16.73900000 | 11.68700000 |
| C | 12.05200000 | 8.51800000  | 7.15800000  |
| C | 11.16500000 | 14.61300000 | 11.62800000 |
| C | 15.51700000 | 8.57900000  | 8.81700000  |
| C | 7.10600000  | 2.59800000  | 11.59200000 |
| C | 6.90300000  | 20.72200000 | 7.74400000  |
| C | 12.91900000 | 16.12200000 | 12.35100000 |
| C | 9.58700000  | 8.40500000  | 7.95800000  |
| C | 3.76200000  | 6.13400000  | 10.10500000 |
| C | 7.36800000  | 14.65300000 | 4.82500000  |
| C | 11.17400000 | 2.23400000  | 7.70200000  |
| C | 12.90400000 | 12.65700000 | 7.95300000  |
| C | 4.24200000  | 14.05200000 | 6.21500000  |
| C | 11.77600000 | 15.36800000 | 12.63000000 |
| C | 7.25200000  | 7.62800000  | 5.59200000  |
| C | 8.20400000  | 3.31300000  | 12.07300000 |
| C | 7.38600000  | 20.53500000 | 6.44600000  |
| C | 7.90500000  | 18.23100000 | 6.99600000  |
| C | 11.68300000 | 14.44000000 | 6.89200000  |
| C | 2.88200000  | 14.17800000 | 6.52200000  |
| C | 9.66200000  | 3.59900000  | 6.41800000  |
| C | 15.34000000 | 6.53400000  | 7.56300000  |
| C | 11.50300000 | 7.22300000  | 3.56200000  |
| C | 5.64200000  | 8.46600000  | 3.98500000  |
| C | 12.60600000 | 9.36500000  | 3.47000000  |
| C | 13.74300000 | 12.56300000 | 6.84200000  |
| C | 6.98700000  | 12.64300000 | 2.93500000  |
| C | 3.17800000  | 12.74900000 | 8.44400000  |
| C | 12.07700000 | 8.25000000  | 2.81200000  |

|   |             |             |             |
|---|-------------|-------------|-------------|
| C | 9.84900000  | 2.76300000  | 5.31300000  |
| C | 2.34400000  | 13.52400000 | 7.63200000  |
| C | 16.07700000 | 7.37100000  | 8.40300000  |
| C | 13.55000000 | 13.40700000 | 5.74500000  |
| C | 7.63300000  | 14.90200000 | 3.47300000  |
| C | 12.51800000 | 14.34700000 | 5.77600000  |
| C | 7.88900000  | 19.28700000 | 6.07700000  |
| C | 7.44600000  | 13.89700000 | 2.52300000  |
| C | 6.76900000  | 7.70000000  | 4.28000000  |
| C | 10.70100000 | 1.66000000  | 5.39900000  |
| C | 11.36600000 | 1.39900000  | 6.60100000  |
| C | 10.85200000 | 8.58800000  | 11.50400000 |
| C | 11.00800000 | 7.37800000  | 12.19900000 |
| C | 9.94000000  | 6.80900000  | 12.88900000 |
| C | 8.70800000  | 7.45400000  | 12.88900000 |
| C | 8.51400000  | 8.67300000  | 12.21300000 |
| C | 9.58900000  | 9.20300000  | 11.48100000 |
| C | 7.20500000  | 9.38700000  | 12.39300000 |
| C | 12.05500000 | 9.21300000  | 10.85700000 |
| C | 10.54600000 | 11.53900000 | 14.76200000 |
| C | 10.12600000 | 11.67500000 | 16.08000000 |
| C | 8.81000000  | 12.05700000 | 16.36500000 |
| C | 7.93300000  | 12.31300000 | 15.30400000 |
| C | 8.34600000  | 12.19300000 | 13.98000000 |
| C | 9.67000000  | 11.79200000 | 13.67600000 |
| H | 7.76400000  | 5.68700000  | 8.89200000  |
| H | 9.28800000  | 12.39800000 | 5.66400000  |
| H | 9.67100000  | 9.66200000  | 5.52800000  |
| H | 8.25000000  | 17.63200000 | 10.08400000 |
| H | 7.03300000  | 9.21500000  | 8.53300000  |
| H | 11.95900000 | 5.97100000  | 8.07900000  |

|   |             |             |             |
|---|-------------|-------------|-------------|
| H | 10.95600000 | 12.68500000 | 9.69700000  |
| H | 9.83200000  | 16.04300000 | 9.84800000  |
| H | 5.56700000  | 9.01600000  | 10.25700000 |
| H | 7.82600000  | 2.69500000  | 8.26000000  |
| H | 4.83600000  | 17.61800000 | 8.54100000  |
| H | 4.97000000  | 9.63400000  | 7.11700000  |
| H | 6.14100000  | 15.50700000 | 7.72200000  |
| H | 6.77400000  | 11.99700000 | 6.83300000  |
| H | 13.27000000 | 15.34100000 | 9.05300000  |
| H | 6.11800000  | 1.82800000  | 9.83300000  |
| H | 11.05000000 | 4.14900000  | 9.44600000  |
| H | 5.89500000  | 5.73700000  | 7.47900000  |
| H | 11.00600000 | 6.49200000  | 5.52800000  |
| H | 6.37100000  | 11.41300000 | 4.59400000  |
| H | 14.33200000 | 16.69800000 | 10.82300000 |
| H | 2.77800000  | 17.19600000 | 9.86100000  |
| H | 7.24200000  | 16.70700000 | 12.00000000 |
| H | 4.11900000  | 9.77300000  | 4.79800000  |
| H | 4.05100000  | 4.57200000  | 8.63700000  |
| H | 6.54200000  | 19.83100000 | 9.66800000  |
| H | 3.69500000  | 7.87500000  | 11.39000000 |
| H | 13.80100000 | 9.87400000  | 8.75400000  |
| H | 10.00500000 | 4.38400000  | 11.56600000 |
| H | 12.97900000 | 10.31800000 | 5.36800000  |
| H | 5.16400000  | 12.00600000 | 8.78700000  |
| H | 5.18600000  | 16.33000000 | 13.33500000 |
| H | 13.51900000 | 6.24500000  | 6.45900000  |
| H | 2.94000000  | 16.57700000 | 12.27500000 |
| H | 11.97100000 | 9.58800000  | 7.40300000  |
| H | 10.29600000 | 14.00000000 | 11.87100000 |
| H | 16.08500000 | 9.25500000  | 9.46000000  |

|   |             |             |             |
|---|-------------|-------------|-------------|
| H | 6.35500000  | 2.21100000  | 12.28500000 |
| H | 6.52300000  | 21.69800000 | 8.05300000  |
| H | 13.39900000 | 16.70700000 | 13.13800000 |
| H | 2.93900000  | 5.62300000  | 10.60900000 |
| H | 7.52200000  | 15.45200000 | 5.55300000  |
| H | 11.69200000 | 2.02000000  | 8.64100000  |
| H | 13.06100000 | 12.00800000 | 8.81700000  |
| H | 4.64200000  | 14.56400000 | 5.33800000  |
| H | 11.35600000 | 15.35400000 | 13.64000000 |
| H | 8.13200000  | 7.02000000  | 5.80700000  |
| H | 8.31800000  | 3.49000000  | 13.14500000 |
| H | 7.38300000  | 21.36200000 | 5.73300000  |
| H | 8.32000000  | 17.26800000 | 6.69700000  |
| H | 10.88600000 | 15.18700000 | 6.90800000  |
| H | 2.24200000  | 14.79100000 | 5.88300000  |
| H | 8.99600000  | 4.46100000  | 6.33700000  |
| H | 15.77600000 | 5.59800000  | 7.20500000  |
| H | 11.08900000 | 6.34600000  | 3.06100000  |
| H | 5.26000000  | 8.51600000  | 2.96400000  |
| H | 13.05300000 | 10.18000000 | 2.89700000  |
| H | 14.55000000 | 11.82700000 | 6.83500000  |
| H | 6.84200000  | 11.84300000 | 2.20500000  |
| H | 2.79600000  | 12.24700000 | 9.33500000  |
| H | 12.11500000 | 8.18500000  | 1.72200000  |
| H | 9.32400000  | 2.97600000  | 4.37800000  |
| H | 1.28200000  | 13.61800000 | 7.86500000  |
| H | 17.08500000 | 7.09300000  | 8.71700000  |
| H | 14.20300000 | 13.33400000 | 4.87200000  |
| H | 7.98800000  | 15.88700000 | 3.16500000  |
| H | 12.36000000 | 15.01500000 | 4.92700000  |
| H | 8.28100000  | 19.13200000 | 5.07000000  |

|                                            |             |             |             |
|--------------------------------------------|-------------|-------------|-------------|
| H                                          | 7.66100000  | 14.08700000 | 1.47000000  |
| H                                          | 7.27900000  | 7.14600000  | 3.48900000  |
| H                                          | 10.85000000 | 1.00800000  | 4.53600000  |
| H                                          | 12.03700000 | 0.54000000  | 6.68100000  |
| H                                          | 11.99300000 | 6.89900000  | 12.20700000 |
| H                                          | 7.86600000  | 7.03400000  | 13.44700000 |
| H                                          | 6.36000000  | 8.68300000  | 12.38400000 |
| H                                          | 7.03400000  | 10.16000000 | 11.63200000 |
| H                                          | 7.18900000  | 9.90100000  | 13.36600000 |
| H                                          | 12.81100000 | 8.45800000  | 10.60900000 |
| H                                          | 12.53900000 | 9.94500000  | 11.52500000 |
| H                                          | 11.76800000 | 9.75700000  | 9.94400000  |
| H                                          | 10.07600000 | 5.87800000  | 13.44300000 |
| H                                          | 7.63800000  | 12.38600000 | 13.16900000 |
| H                                          | 11.57000000 | 11.21800000 | 14.54300000 |
| H                                          | 10.82900000 | 11.46200000 | 16.88700000 |
| H                                          | 6.90200000  | 12.60500000 | 15.51100000 |
| H                                          | 8.47500000  | 12.14200000 | 17.40100000 |
| H                                          | 11.12300000 | 11.44300000 | 12.41500000 |
| Cl                                         | 7.43700000  | 12.11000000 | 11.55500000 |
| Na                                         | 7.63600000  | 14.12800000 | 10.17500000 |
| NaCl                                       |             |             |             |
| Cl                                         | 9.72500000  | 11.70300000 | 12.33200000 |
| Na                                         | 7.40000000  | 11.19000000 | 12.33200000 |
| IM5-IPr <sup>#</sup> (IM5-L <sub>A</sub> ) |             |             |             |
| Pd                                         | 9.08000000  | 10.31700000 | 10.51200000 |
| N                                          | 9.09200000  | 11.98400000 | 7.59100000  |
| N                                          | 9.34300000  | 9.85300000  | 7.40000000  |
| N                                          | 9.51900000  | 11.74200000 | 11.91300000 |
| C                                          | 8.56600000  | 6.34400000  | 8.42000000  |
| C                                          | 9.07400000  | 10.82400000 | 8.34600000  |

|   |             |             |             |
|---|-------------|-------------|-------------|
| C | 8.36200000  | 7.67700000  | 8.03700000  |
| C | 9.83200000  | 5.75600000  | 8.40900000  |
| C | 11.68400000 | 14.45000000 | 10.22600000 |
| C | 9.37500000  | 11.72800000 | 6.25100000  |
| C | 7.95000000  | 15.91100000 | 8.77300000  |
| C | 9.51900000  | 10.38700000 | 6.12700000  |
| C | 7.50700000  | 17.26100000 | 9.32800000  |
| C | 9.62500000  | 14.12100000 | 8.73900000  |
| C | 6.94500000  | 8.24700000  | 7.88800000  |
| C | 6.49100000  | 8.36000000  | 6.42600000  |
| C | 10.91600000 | 6.52100000  | 7.96900000  |
| C | 11.03300000 | 13.64000000 | 9.09400000  |
| C | 9.21500000  | 15.41300000 | 9.09000000  |
| C | 5.85000000  | 7.50200000  | 8.65100000  |
| C | 5.24200000  | 8.10500000  | 9.75800000  |
| C | 10.32100000 | 3.40100000  | 7.58700000  |
| C | 7.91700000  | 3.03100000  | 9.32200000  |
| C | 4.95700000  | 17.16500000 | 9.59000000  |
| C | 9.04700000  | 3.73400000  | 9.76200000  |
| C | 5.38300000  | 9.17500000  | 6.13700000  |
| C | 7.10200000  | 15.11200000 | 8.00400000  |
| C | 6.55700000  | 13.07000000 | 6.62400000  |
| C | 12.91300000 | 15.10700000 | 10.07500000 |
| C | 6.84200000  | 13.41400000 | 5.15600000  |
| C | 7.42600000  | 18.40000000 | 8.31200000  |
| C | 6.23700000  | 17.05800000 | 10.15200000 |
| C | 5.07600000  | 13.22300000 | 6.98900000  |
| C | 8.72300000  | 13.31800000 | 8.01000000  |
| C | 10.78300000 | 7.85800000  | 7.58900000  |
| C | 6.98300000  | 2.53900000  | 10.23600000 |
| C | 10.08700000 | 4.30200000  | 8.80000000  |

|   |             |             |             |
|---|-------------|-------------|-------------|
| C | 7.47600000  | 13.83000000 | 7.58100000  |
| C | 5.36400000  | 6.25400000  | 8.22600000  |
| C | 12.04500000 | 8.45400000  | 5.45900000  |
| C | 11.58600000 | 7.31900000  | 4.77500000  |
| C | 6.67100000  | 12.42200000 | 4.17600000  |
| C | 13.48100000 | 15.82400000 | 11.13500000 |
| C | 3.82000000  | 16.88000000 | 10.34900000 |
| C | 11.93900000 | 13.55800000 | 7.86800000  |
| C | 6.34900000  | 16.66800000 | 11.49500000 |
| C | 4.84100000  | 9.22200000  | 4.85400000  |
| C | 4.33700000  | 5.61300000  | 8.91800000  |
| C | 6.89200000  | 19.63700000 | 8.71200000  |
| C | 13.33400000 | 8.17800000  | 7.59100000  |
| C | 4.20400000  | 7.47200000  | 10.44700000 |
| C | 13.86100000 | 8.90300000  | 8.66800000  |
| C | 9.21900000  | 3.92700000  | 11.14100000 |
| C | 12.65100000 | 9.48100000  | 4.71700000  |
| C | 4.61900000  | 12.68600000 | 8.20400000  |
| C | 5.21400000  | 16.39000000 | 12.25800000 |
| C | 14.08900000 | 7.10800000  | 7.08600000  |
| C | 3.94400000  | 16.49200000 | 11.68500000 |
| C | 11.98700000 | 8.59000000  | 6.98700000  |
| C | 11.03900000 | 14.53300000 | 11.47200000 |
| C | 15.09300000 | 8.57000000  | 9.23600000  |
| C | 7.16900000  | 2.72900000  | 11.60700000 |
| C | 6.86600000  | 20.72500000 | 7.84000000  |
| C | 12.83000000 | 15.89700000 | 12.36500000 |
| C | 9.49700000  | 8.44900000  | 7.69300000  |
| C | 3.75400000  | 6.21700000  | 10.03500000 |
| C | 7.24100000  | 14.69100000 | 4.73800000  |
| C | 11.19700000 | 2.31100000  | 7.70300000  |

|   |             |             |             |
|---|-------------|-------------|-------------|
| C | 12.96900000 | 12.60600000 | 7.84100000  |
| C | 4.15100000  | 13.85900000 | 6.15200000  |
| C | 11.60500000 | 15.24300000 | 12.53000000 |
| C | 7.05300000  | 7.60900000  | 5.38600000  |
| C | 8.29300000  | 3.42700000  | 12.05600000 |
| C | 7.37800000  | 20.60300000 | 6.54500000  |
| C | 7.94700000  | 18.29500000 | 7.01600000  |
| C | 11.83700000 | 14.45400000 | 6.79600000  |
| C | 2.80400000  | 13.95800000 | 6.51800000  |
| C | 9.66900000  | 3.60100000  | 6.36200000  |
| C | 15.32000000 | 6.76600000  | 7.65300000  |
| C | 11.74400000 | 7.20800000  | 3.38900000  |
| C | 5.40200000  | 8.45700000  | 3.82600000  |
| C | 12.80300000 | 9.37400000  | 3.33400000  |
| C | 13.86900000 | 12.54300000 | 6.77700000  |
| C | 6.89100000  | 12.69600000 | 2.82600000  |
| C | 3.27700000  | 12.78100000 | 8.57000000  |
| C | 12.35300000 | 8.23200000  | 2.66400000  |
| C | 9.87600000  | 2.72900000  | 5.28900000  |
| C | 2.36100000  | 13.41900000 | 7.72600000  |
| C | 15.82800000 | 7.49600000  | 8.73000000  |
| C | 13.75100000 | 13.43700000 | 5.70900000  |
| C | 7.46200000  | 14.96900000 | 3.38500000  |
| C | 12.73200000 | 14.39200000 | 5.72300000  |
| C | 7.92100000  | 19.38500000 | 6.13900000  |
| C | 7.28900000  | 13.97400000 | 2.42200000  |
| C | 6.51200000  | 7.65500000  | 4.09600000  |
| C | 10.74500000 | 1.64500000  | 5.42100000  |
| C | 11.40900000 | 1.44100000  | 6.63400000  |
| C | 10.75600000 | 8.61700000  | 12.25600000 |
| C | 10.99600000 | 7.55400000  | 13.13900000 |

|   |             |             |             |
|---|-------------|-------------|-------------|
| C | 9.94600000  | 6.92000000  | 13.80500000 |
| C | 8.64600000  | 7.37200000  | 13.60500000 |
| C | 8.36200000  | 8.43800000  | 12.73400000 |
| C | 9.42200000  | 9.02500000  | 12.00900000 |
| C | 6.92900000  | 8.90000000  | 12.64600000 |
| C | 11.93900000 | 9.31400000  | 11.62900000 |
| C | 10.11000000 | 11.88500000 | 14.28000000 |
| C | 9.75200000  | 12.09900000 | 15.60800000 |
| C | 8.40700000  | 12.24400000 | 15.96300000 |
| C | 7.43200000  | 12.18500000 | 14.96000000 |
| C | 7.78500000  | 11.99100000 | 13.62600000 |
| C | 9.13800000  | 11.82400000 | 13.25000000 |
| H | 7.71100000  | 5.75100000  | 8.74500000  |
| H | 9.43700000  | 12.52100000 | 5.51500000  |
| H | 9.72800000  | 9.76900000  | 5.26300000  |
| H | 8.29400000  | 17.55900000 | 10.04500000 |
| H | 6.96400000  | 9.27000000  | 8.29800000  |
| H | 11.90600000 | 6.06300000  | 7.92600000  |
| H | 10.91800000 | 12.60800000 | 9.47600000  |
| H | 9.90100000  | 16.04100000 | 9.66000000  |
| H | 5.59100000  | 9.08600000  | 10.08600000 |
| H | 7.77300000  | 2.85500000  | 8.25400000  |
| H | 4.84900000  | 17.48000000 | 8.55000000  |
| H | 4.92300000  | 9.76100000  | 6.93800000  |
| H | 6.10600000  | 15.47400000 | 7.73900000  |
| H | 6.77800000  | 11.99500000 | 6.73200000  |
| H | 13.44400000 | 15.05300000 | 9.12300000  |
| H | 6.10400000  | 1.99900000  | 9.87500000  |
| H | 11.04000000 | 4.31100000  | 9.35700000  |
| H | 5.78200000  | 5.78700000  | 7.33200000  |
| H | 11.10900000 | 6.50700000  | 5.32700000  |

|   |             |             |             |
|---|-------------|-------------|-------------|
| H | 6.36700000  | 11.41700000 | 4.47800000  |
| H | 14.44000000 | 16.32700000 | 10.99100000 |
| H | 2.83200000  | 16.96100000 | 9.89100000  |
| H | 7.34100000  | 16.57200000 | 11.94500000 |
| H | 3.97400000  | 9.85700000  | 4.65700000  |
| H | 3.98200000  | 4.63800000  | 8.57600000  |
| H | 6.49000000  | 19.74500000 | 9.72200000  |
| H | 3.74800000  | 7.96200000  | 11.30900000 |
| H | 13.29500000 | 9.74300000  | 9.07200000  |
| H | 10.08700000 | 4.48500000  | 11.50400000 |
| H | 13.00300000 | 10.37700000 | 5.23400000  |
| H | 5.32900000  | 12.19600000 | 8.87500000  |
| H | 5.32400000  | 16.08900000 | 13.30100000 |
| H | 13.72400000 | 6.54500000  | 6.22500000  |
| H | 3.05400000  | 16.27300000 | 12.27900000 |
| H | 11.86900000 | 9.66400000  | 7.20100000  |
| H | 10.08200000 | 14.02300000 | 11.61100000 |
| H | 15.47800000 | 9.15600000  | 10.07300000 |
| H | 6.44300000  | 2.33600000  | 12.32100000 |
| H | 6.45100000  | 21.67700000 | 8.17900000  |
| H | 13.27000000 | 16.45500000 | 13.19400000 |
| H | 2.95000000  | 5.71500000  | 10.57700000 |
| H | 7.38500000  | 15.48200000 | 5.47500000  |
| H | 11.71600000 | 2.14100000  | 8.65000000  |
| H | 13.07400000 | 11.91700000 | 8.68200000  |
| H | 4.48100000  | 14.27700000 | 5.20000000  |
| H | 11.08600000 | 15.28000000 | 13.48900000 |
| H | 7.91800000  | 6.97300000  | 5.58600000  |
| H | 8.45100000  | 3.58600000  | 13.12500000 |
| H | 7.36100000  | 21.45500000 | 5.86300000  |
| H | 8.39200000  | 17.35300000 | 6.68900000  |

|   |             |             |             |
|---|-------------|-------------|-------------|
| H | 11.05200000 | 15.21300000 | 6.79900000  |
| H | 2.10000000  | 14.45700000 | 5.84900000  |
| H | 8.99500000  | 4.45300000  | 6.24400000  |
| H | 15.88800000 | 5.93000000  | 7.24200000  |
| H | 11.39000000 | 6.31000000  | 2.87800000  |
| H | 4.97400000  | 8.48600000  | 2.82200000  |
| H | 13.27500000 | 10.18700000 | 2.77900000  |
| H | 14.66500000 | 11.79400000 | 6.78500000  |
| H | 6.75500000  | 11.90500000 | 2.08500000  |
| H | 2.94300000  | 12.35600000 | 9.51800000  |
| H | 12.47700000 | 8.14500000  | 1.58300000  |
| H | 9.35500000  | 2.90200000  | 4.34400000  |
| H | 1.30900000  | 13.49300000 | 8.01100000  |
| H | 16.79600000 | 7.23800000  | 9.16500000  |
| H | 14.45100000 | 13.39100000 | 4.87100000  |
| H | 7.77000000  | 15.97300000 | 3.08600000  |
| H | 12.63500000 | 15.10000000 | 4.89700000  |
| H | 8.33700000  | 19.27900000 | 5.13400000  |
| H | 7.46800000  | 14.19000000 | 1.36700000  |
| H | 6.95800000  | 7.05200000  | 3.30200000  |
| H | 10.90800000 | 0.96400000  | 4.58300000  |
| H | 12.09600000 | 0.60000000  | 6.74700000  |
| H | 12.02800000 | 7.23500000  | 13.31200000 |
| H | 7.81500000  | 6.91100000  | 14.14600000 |
| H | 6.26700000  | 8.07100000  | 12.35300000 |
| H | 6.81500000  | 9.71000000  | 11.91300000 |
| H | 6.58400000  | 9.28200000  | 13.61900000 |
| H | 12.80200000 | 8.64100000  | 11.52700000 |
| H | 12.27000000 | 10.16400000 | 12.25100000 |
| H | 11.67800000 | 9.71200000  | 10.63800000 |
| H | 10.14500000 | 6.09300000  | 14.48900000 |

|                                            |             |             |             |
|--------------------------------------------|-------------|-------------|-------------|
| H                                          | 7.01800000  | 11.97000000 | 12.84900000 |
| H                                          | 11.16500000 | 11.74900000 | 14.01500000 |
| H                                          | 10.53000000 | 12.13200000 | 16.37300000 |
| H                                          | 6.37600000  | 12.29400000 | 15.22200000 |
| H                                          | 8.12900000  | 12.39900000 | 17.00600000 |
| H                                          | 10.54700000 | 11.70200000 | 11.90700000 |
| TS5-IPr <sup>#</sup> (TS5-L <sub>A</sub> ) |             |             |             |
| Pd                                         | 9.03600000  | 10.67400000 | 10.30800000 |
| N                                          | 9.08400000  | 12.01400000 | 7.45900000  |
| N                                          | 9.33000000  | 9.87100000  | 7.35700000  |
| N                                          | 9.43100000  | 11.25200000 | 12.18200000 |
| C                                          | 8.55800000  | 6.37800000  | 8.44200000  |
| C                                          | 9.08200000  | 10.88700000 | 8.26700000  |
| C                                          | 8.35900000  | 7.71100000  | 8.05800000  |
| C                                          | 9.82200000  | 5.78500000  | 8.42400000  |
| C                                          | 11.67100000 | 14.40100000 | 10.12200000 |
| C                                          | 9.33800000  | 11.70000000 | 6.12700000  |
| C                                          | 7.95300000  | 15.92100000 | 8.70400000  |
| C                                          | 9.48200000  | 10.35500000 | 6.06100000  |
| C                                          | 7.51100000  | 17.26000000 | 9.28900000  |
| C                                          | 9.63600000  | 14.14100000 | 8.60700000  |
| C                                          | 6.94800000  | 8.29100000  | 7.94400000  |
| C                                          | 6.45600000  | 8.38400000  | 6.49600000  |
| C                                          | 10.90600000 | 6.55000000  | 7.98800000  |
| C                                          | 11.03400000 | 13.63300000 | 8.96100000  |
| C                                          | 9.22400000  | 15.42000000 | 8.99800000  |
| C                                          | 5.89400000  | 7.56900000  | 8.77900000  |
| C                                          | 5.49700000  | 8.10300000  | 9.99500000  |
| C                                          | 10.30600000 | 3.43100000  | 7.59200000  |
| C                                          | 7.89500000  | 3.07400000  | 9.31900000  |
| C                                          | 4.96000000  | 17.15500000 | 9.54800000  |

|   |             |             |             |
|---|-------------|-------------|-------------|
| C | 9.03900000  | 3.74900000  | 9.76700000  |
| C | 5.34800000  | 9.20300000  | 6.21800000  |
| C | 7.10200000  | 15.13900000 | 7.92100000  |
| C | 6.54100000  | 13.10800000 | 6.52700000  |
| C | 12.85400000 | 15.13700000 | 9.99100000  |
| C | 6.80300000  | 13.45100000 | 5.05600000  |
| C | 7.43200000  | 18.41800000 | 8.29200000  |
| C | 6.24000000  | 17.06600000 | 10.11400000 |
| C | 5.06800000  | 13.25700000 | 6.92000000  |
| C | 8.72800000  | 13.35100000 | 7.87000000  |
| C | 10.77000000 | 7.88600000  | 7.60100000  |
| C | 6.96500000  | 2.56400000  | 10.22800000 |
| C | 10.07700000 | 4.32800000  | 8.80900000  |
| C | 7.47500000  | 13.86800000 | 7.46900000  |
| C | 5.26900000  | 6.39700000  | 8.34300000  |
| C | 12.07300000 | 8.47400000  | 5.49500000  |
| C | 11.63300000 | 7.33100000  | 4.81300000  |
| C | 6.62300000  | 12.45500000 | 4.08200000  |
| C | 13.39900000 | 15.82500000 | 11.08100000 |
| C | 3.82000000  | 16.89800000 | 10.31300000 |
| C | 11.96300000 | 13.54900000 | 7.75500000  |
| C | 6.34600000  | 16.72900000 | 11.47100000 |
| C | 4.79100000  | 9.25100000  | 4.94100000  |
| C | 4.29400000  | 5.76800000  | 9.11400000  |
| C | 6.90400000  | 19.65100000 | 8.71100000  |
| C | 13.30100000 | 8.23400000  | 7.68400000  |
| C | 4.51300000  | 7.48200000  | 10.76400000 |
| C | 13.66700000 | 8.84400000  | 8.87800000  |
| C | 9.22800000  | 3.89600000  | 11.14900000 |
| C | 12.67700000 | 9.50100000  | 4.75300000  |
| C | 4.63800000  | 12.70900000 | 8.14000000  |

|   |             |             |             |
|---|-------------|-------------|-------------|
| C | 5.20800000  | 16.48400000 | 12.24100000 |
| C | 14.17600000 | 7.29300000  | 7.14200000  |
| C | 3.93900000  | 16.56100000 | 11.66200000 |
| C | 11.97800000 | 8.62300000  | 7.01800000  |
| C | 11.05100000 | 14.37100000 | 11.38000000 |
| C | 14.86300000 | 8.52400000  | 9.51800000  |
| C | 7.16900000  | 2.70900000  | 11.60100000 |
| C | 6.88500000  | 20.75300000 | 7.85800000  |
| C | 12.77400000 | 15.78500000 | 12.32300000 |
| C | 9.48800000  | 8.47900000  | 7.69400000  |
| C | 3.91100000  | 6.30800000  | 10.32900000 |
| C | 7.20200000  | 14.72500000 | 4.63100000  |
| C | 11.17600000 | 2.33500000  | 7.70400000  |
| C | 13.01000000 | 12.61400000 | 7.76700000  |
| C | 4.12500000  | 13.89700000 | 6.10700000  |
| C | 11.59500000 | 15.05100000 | 12.46900000 |
| C | 6.99800000  | 7.62600000  | 5.45100000  |
| C | 8.30600000  | 3.37800000  | 12.05900000 |
| C | 7.39600000  | 20.64800000 | 6.56100000  |
| C | 7.94800000  | 18.32800000 | 6.99300000  |
| C | 11.86500000 | 14.41700000 | 6.65900000  |
| C | 2.78600000  | 13.99000000 | 6.50300000  |
| C | 9.65500000  | 3.64100000  | 6.36800000  |
| C | 15.37300000 | 6.96500000  | 7.78400000  |
| C | 11.80200000 | 7.21400000  | 3.42900000  |
| C | 5.33600000  | 8.48100000  | 3.90700000  |
| C | 12.84300000 | 9.38900000  | 3.37200000  |
| C | 13.93200000 | 12.54800000 | 6.72200000  |
| C | 6.83600000  | 12.72300000 | 2.72900000  |
| C | 3.30400000  | 12.79900000 | 8.53500000  |
| C | 12.40900000 | 8.24000000  | 2.70300000  |

|   |             |             |             |
|---|-------------|-------------|-------------|
| C | 9.85900000  | 2.77300000  | 5.29100000  |
| C | 2.37000000  | 13.44200000 | 7.71600000  |
| C | 15.72200000 | 7.57800000  | 8.97300000  |
| C | 13.82100000 | 13.41800000 | 5.63400000  |
| C | 7.41500000  | 14.99800000 | 3.27500000  |
| C | 12.78300000 | 14.35100000 | 5.60600000  |
| C | 7.92800000  | 19.43200000 | 6.13400000  |
| C | 7.23500000  | 13.99800000 | 2.31800000  |
| C | 6.44300000  | 7.67200000  | 4.16700000  |
| C | 10.72400000 | 1.68500000  | 5.41800000  |
| C | 11.38500000 | 1.47000000  | 6.63000000  |
| C | 10.71900000 | 9.12400000  | 12.23400000 |
| C | 10.91900000 | 7.90800000  | 12.84900000 |
| C | 9.85400000  | 7.20900000  | 13.40500000 |
| C | 8.57300000  | 7.73500000  | 13.35200000 |
| C | 8.32300000  | 8.94900000  | 12.74500000 |
| C | 9.40800000  | 9.62100000  | 12.15600000 |
| C | 6.91700000  | 9.47800000  | 12.74100000 |
| C | 11.89200000 | 9.88000000  | 11.67400000 |
| C | 9.69800000  | 11.92500000 | 14.47900000 |
| C | 9.27200000  | 12.57100000 | 15.56400000 |
| C | 8.10000000  | 13.13900000 | 15.50200000 |
| C | 7.36200000  | 13.06400000 | 14.34000000 |
| C | 7.78900000  | 12.43200000 | 13.24600000 |
| C | 8.96200000  | 11.85700000 | 13.30200000 |
| H | 7.69800000  | 5.79200000  | 8.77000000  |
| H | 9.38900000  | 12.45600000 | 5.35400000  |
| H | 9.68100000  | 9.70300000  | 5.22000000  |
| H | 8.30100000  | 17.54300000 | 10.00900000 |
| H | 6.99800000  | 9.32100000  | 8.33700000  |
| H | 11.89800000 | 6.09500000  | 7.95000000  |

|   |             |             |             |
|---|-------------|-------------|-------------|
| H | 10.88400000 | 12.59600000 | 9.32800000  |
| H | 9.91000000  | 16.03400000 | 9.58300000  |
| H | 5.97000000  | 9.02000000  | 10.33600000 |
| H | 7.73700000  | 2.93100000  | 8.24800000  |
| H | 4.85200000  | 17.43700000 | 8.49900000  |
| H | 4.90400000  | 9.79700000  | 7.02200000  |
| H | 6.10400000  | 15.50500000 | 7.67500000  |
| H | 6.76700000  | 12.03400000 | 6.63200000  |
| H | 13.36300000 | 15.17200000 | 9.03000000  |
| H | 6.07700000  | 2.04500000  | 9.86000000  |
| H | 11.03100000 | 4.33300000  | 9.36500000  |
| H | 5.53700000  | 5.98100000  | 7.37900000  |
| H | 11.15500000 | 6.51900000  | 5.36400000  |
| H | 6.32100000  | 11.45100000 | 4.39100000  |
| H | 14.32000000 | 16.39400000 | 10.95200000 |
| H | 2.83400000  | 16.96100000 | 9.84900000  |
| H | 7.33700000  | 16.65300000 | 11.92700000 |
| H | 3.92700000  | 9.89200000  | 4.75300000  |
| H | 3.82600000  | 4.85400000  | 8.75800000  |
| H | 6.50200000  | 19.74500000 | 9.72300000  |
| H | 4.21300000  | 7.92200000  | 11.70600000 |
| H | 12.99700000 | 9.58000000  | 9.31100000  |
| H | 10.11000000 | 4.42800000  | 11.51500000 |
| H | 13.01200000 | 10.40500000 | 5.26600000  |
| H | 5.36500000  | 12.21400000 | 8.79000000  |
| H | 5.31300000  | 16.23400000 | 13.29800000 |
| H | 13.93000000 | 6.81800000  | 6.20100000  |
| H | 3.04800000  | 16.36400000 | 12.26100000 |
| H | 11.83900000 | 9.69700000  | 7.21800000  |
| H | 10.12000000 | 13.81000000 | 11.49500000 |
| H | 15.12700000 | 9.02000000  | 10.44300000 |

|   |             |             |             |
|---|-------------|-------------|-------------|
| H | 6.44800000  | 2.29900000  | 12.31100000 |
| H | 6.47600000  | 21.70200000 | 8.21100000  |
| H | 13.19800000 | 16.32200000 | 13.17200000 |
| H | 3.14400000  | 5.82000000  | 10.93100000 |
| H | 7.35400000  | 15.51900000 | 5.36500000  |
| H | 11.69200000 | 2.15700000  | 8.65100000  |
| H | 13.10800000 | 11.93700000 | 8.62000000  |
| H | 4.43500000  | 14.32000000 | 5.15000000  |
| H | 11.09200000 | 15.00800000 | 13.43500000 |
| H | 7.86200000  | 6.98600000  | 5.64000000  |
| H | 8.47800000  | 3.49700000  | 13.13000000 |
| H | 7.38600000  | 21.51200000 | 5.89400000  |
| H | 8.38200000  | 17.38700000 | 6.65000000  |
| H | 11.06200000 | 15.15700000 | 6.62800000  |
| H | 2.06600000  | 14.49200000 | 5.85300000  |
| H | 8.98500000  | 4.49500000  | 6.25500000  |
| H | 16.03800000 | 6.22900000  | 7.34200000  |
| H | 11.45700000 | 6.31200000  | 2.91900000  |
| H | 4.89700000  | 8.51200000  | 2.90800000  |
| H | 13.31100000 | 10.20400000 | 2.81600000  |
| H | 14.73900000 | 11.81300000 | 6.76000000  |
| H | 6.69700000  | 11.92800000 | 1.99300000  |
| H | 2.99100000  | 12.36500000 | 9.48700000  |
| H | 12.53900000 | 8.15000000  | 1.62300000  |
| H | 9.33900000  | 2.95200000  | 4.34700000  |
| H | 1.32400000  | 13.51100000 | 8.02300000  |
| H | 16.66100000 | 7.32700000  | 9.46800000  |
| H | 14.53900000 | 13.36900000 | 4.81400000  |
| H | 7.72600000  | 15.99900000 | 2.96900000  |
| H | 12.68700000 | 15.03700000 | 4.76200000  |
| H | 8.33900000  | 19.33800000 | 5.12600000  |

|   |             |             |             |
|---|-------------|-------------|-------------|
| H | 7.40900000  | 14.20800000 | 1.26100000  |
| H | 6.87900000  | 7.06800000  | 3.36800000  |
| H | 10.88600000 | 1.00800000  | 4.57600000  |
| H | 12.06800000 | 0.62500000  | 6.74000000  |
| H | 11.93100000 | 7.51800000  | 12.89700000 |
| H | 7.73100000  | 7.20100000  | 13.78700000 |
| H | 6.21300000  | 8.66500000  | 12.72000000 |
| H | 6.72100000  | 10.11900000 | 11.88700000 |
| H | 6.71100000  | 10.06800000 | 13.62100000 |
| H | 12.78100000 | 9.23900000  | 11.61800000 |
| H | 12.15700000 | 10.75000000 | 12.29600000 |
| H | 11.67400000 | 10.25700000 | 10.66100000 |
| H | 10.02300000 | 6.26200000  | 13.88200000 |
| H | 7.22200000  | 12.37300000 | 12.33500000 |
| H | 10.61000000 | 11.46400000 | 14.53200000 |
| H | 9.85700000  | 12.62100000 | 16.46400000 |
| H | 6.43700000  | 13.49500000 | 14.28200000 |
| H | 7.76400000  | 13.63500000 | 16.35400000 |
| H | 10.40000000 | 11.44900000 | 12.01400000 |

Product 2,6-dimethyl-N-phenylaniline

|   |             |             |             |
|---|-------------|-------------|-------------|
| C | 10.34100000 | 9.45100000  | 14.84800000 |
| C | 10.55600000 | 8.19500000  | 15.43000000 |
| C | 9.48800000  | 7.42300000  | 15.88700000 |
| C | 8.18800000  | 7.91400000  | 15.78700000 |
| C | 7.92600000  | 9.15700000  | 15.19400000 |
| C | 9.01500000  | 9.92300000  | 14.72000000 |
| C | 6.51400000  | 9.63000000  | 15.00900000 |
| C | 11.50000000 | 10.28200000 | 14.36600000 |
| C | 8.19900000  | 13.44700000 | 13.64100000 |
| C | 7.92600000  | 14.72300000 | 14.12800000 |
| C | 7.92700000  | 14.97900000 | 15.50300000 |

|                                               |             |             |             |
|-----------------------------------------------|-------------|-------------|-------------|
| C                                             | 8.20900000  | 13.93000000 | 16.38100000 |
| C                                             | 8.48700000  | 12.64500000 | 15.90800000 |
| C                                             | 8.48500000  | 12.38300000 | 14.52500000 |
| H                                             | 11.57700000 | 7.81300000  | 15.51600000 |
| H                                             | 7.34800000  | 7.30500000  | 16.13000000 |
| H                                             | 5.80700000  | 8.84700000  | 15.31000000 |
| H                                             | 6.33200000  | 9.88700000  | 13.95500000 |
| H                                             | 6.29800000  | 10.53800000 | 15.59300000 |
| H                                             | 12.44700000 | 9.73700000  | 14.48000000 |
| H                                             | 11.57700000 | 11.22600000 | 14.93000000 |
| H                                             | 11.39200000 | 10.55800000 | 13.30400000 |
| H                                             | 9.67000000  | 6.43400000  | 16.31300000 |
| H                                             | 8.73400000  | 11.84100000 | 16.60300000 |
| H                                             | 8.18400000  | 13.26000000 | 12.56300000 |
| H                                             | 7.69800000  | 15.52500000 | 13.41900000 |
| H                                             | 8.22300000  | 14.11400000 | 17.45700000 |
| H                                             | 7.70000000  | 15.97800000 | 15.88000000 |
| H                                             | 9.10100000  | 11.13600000 | 13.03800000 |
| N                                             | 8.75600000  | 11.12300000 | 13.99500000 |
| Pd-BIAN-IPr <sup>#</sup> (Pd-L <sub>B</sub> ) |             |             |             |
| Pd                                            | 8.75700000  | 10.76600000 | 10.32100000 |
| N                                             | 9.15200000  | 12.01000000 | 7.63200000  |
| N                                             | 9.24800000  | 9.80500000  | 7.52900000  |
| C                                             | 8.46200000  | 6.37600000  | 8.80900000  |
| C                                             | 9.06400000  | 10.86300000 | 8.41900000  |
| C                                             | 8.26700000  | 7.69200000  | 8.36700000  |
| C                                             | 9.73200000  | 5.79600000  | 8.87100000  |
| C                                             | 11.56800000 | 13.95200000 | 10.66000000 |
| C                                             | 9.40200000  | 11.66900000 | 6.31200000  |
| C                                             | 8.05600000  | 15.81600000 | 9.18400000  |
| C                                             | 9.43300000  | 10.28800000 | 6.24100000  |

|   |             |             |             |
|---|-------------|-------------|-------------|
| C | 7.63900000  | 17.13700000 | 9.82700000  |
| C | 9.72100000  | 14.03600000 | 8.93000000  |
| C | 6.86600000  | 8.30400000  | 8.36700000  |
| C | 6.17700000  | 8.27400000  | 7.00700000  |
| C | 10.82900000 | 6.56700000  | 8.48300000  |
| C | 11.08800000 | 13.45700000 | 9.29400000  |
| C | 9.32300000  | 15.28100000 | 9.43100000  |
| C | 5.99500000  | 7.73600000  | 9.49100000  |
| C | 6.25500000  | 8.14100000  | 10.81000000 |
| C | 10.26200000 | 3.40300000  | 8.19800000  |
| C | 7.85800000  | 3.03100000  | 9.90600000  |
| C | 5.10400000  | 16.98600000 | 10.21000000 |
| C | 8.91700000  | 3.85000000  | 10.31700000 |
| C | 5.15400000  | 9.20300000  | 6.75000000  |
| C | 7.17700000  | 15.08100000 | 8.38700000  |
| C | 6.50300000  | 13.09700000 | 6.98100000  |
| C | 12.54800000 | 14.94100000 | 10.81400000 |
| C | 6.43700000  | 13.58600000 | 5.53300000  |
| C | 7.50600000  | 18.30400000 | 8.84400000  |
| C | 6.41200000  | 16.92500000 | 10.71400000 |
| C | 5.12700000  | 13.07100000 | 7.66500000  |
| C | 8.80800000  | 13.32100000 | 8.12600000  |
| C | 10.69400000 | 7.87600000  | 8.01000000  |
| C | 6.89900000  | 2.59100000  | 10.82300000 |
| C | 9.98200000  | 4.36600000  | 9.35000000  |
| C | 7.52800000  | 13.84500000 | 7.83200000  |
| C | 4.95400000  | 6.82700000  | 9.26800000  |
| C | 12.47600000 | 8.30900000  | 6.22200000  |
| C | 12.41800000 | 7.01900000  | 5.67500000  |
| C | 6.20400000  | 12.65100000 | 4.51200000  |
| C | 12.92300000 | 15.38000000 | 12.08900000 |

|   |             |             |             |
|---|-------------|-------------|-------------|
| C | 4.00900000  | 16.71800000 | 11.03200000 |
| C | 12.14100000 | 13.62100000 | 8.20600000  |
| C | 6.59000000  | 16.60300000 | 12.06800000 |
| C | 4.46500000  | 9.19800000  | 5.53700000  |
| C | 4.19800000  | 6.32900000  | 10.33500000 |
| C | 6.91200000  | 19.50500000 | 9.26800000  |
| C | 13.02600000 | 8.52300000  | 8.70800000  |
| C | 5.50200000  | 7.65000000  | 11.87600000 |
| C | 12.75700000 | 9.05800000  | 9.97900000  |
| C | 8.99400000  | 4.21400000  | 11.67000000 |
| C | 13.08000000 | 9.32300000  | 5.46400000  |
| C | 5.02200000  | 12.47700000 | 8.93400000  |
| C | 5.49600000  | 16.34400000 | 12.89500000 |
| C | 14.25900000 | 7.89600000  | 8.49200000  |
| C | 4.20000000  | 16.39700000 | 12.37800000 |
| C | 11.95100000 | 8.65100000  | 7.61900000  |
| C | 10.98100000 | 13.40600000 | 11.81200000 |
| C | 13.69700000 | 8.96600000  | 11.00500000 |
| C | 6.98700000  | 2.95800000  | 12.16600000 |
| C | 6.85000000  | 20.61200000 | 8.42300000  |
| C | 12.32700000 | 14.83300000 | 13.22600000 |
| C | 9.39700000  | 8.43500000  | 7.95900000  |
| C | 4.46800000  | 6.73800000  | 11.64200000 |
| C | 6.55900000  | 14.93700000 | 5.17600000  |
| C | 11.13600000 | 2.32600000  | 8.40700000  |
| C | 13.19100000 | 12.69100000 | 8.14200000  |
| C | 3.96800000  | 13.58100000 | 7.06900000  |
| C | 11.35500000 | 13.83800000 | 13.08300000 |
| C | 6.49400000  | 7.34500000  | 6.00700000  |
| C | 8.04000000  | 3.77300000  | 12.58800000 |
| C | 7.38400000  | 20.54800000 | 7.13300000  |

|   |             |             |             |
|---|-------------|-------------|-------------|
| C | 8.04100000  | 18.25200000 | 7.55000000  |
| C | 12.13800000 | 14.68700000 | 7.29600000  |
| C | 2.73400000  | 13.50300000 | 7.72500000  |
| C | 9.66200000  | 3.53700000  | 6.93800000  |
| C | 15.20200000 | 7.80200000  | 9.52300000  |
| C | 12.95300000 | 6.75200000  | 4.41100000  |
| C | 4.78900000  | 8.26300000  | 4.54900000  |
| C | 13.61200000 | 9.06100000  | 4.20000000  |
| C | 14.21000000 | 12.82400000 | 7.19900000  |
| C | 6.08700000  | 13.05200000 | 3.18100000  |
| C | 3.79300000  | 12.39400000 | 9.58500000  |
| C | 13.55300000 | 7.77000000  | 3.66900000  |
| C | 9.92500000  | 2.61500000  | 5.92000000  |
| C | 2.64000000  | 12.91000000 | 8.98300000  |
| C | 14.92500000 | 8.33400000  | 10.78100000 |
| C | 14.19700000 | 13.89100000 | 6.29600000  |
| C | 6.44200000  | 15.34100000 | 3.84300000  |
| C | 13.15700000 | 14.82100000 | 6.34800000  |
| C | 7.98100000  | 19.36300000 | 6.70200000  |
| C | 6.20200000  | 14.40200000 | 2.84000000  |
| C | 5.80600000  | 7.33900000  | 4.78900000  |
| C | 10.79400000 | 1.54600000  | 6.14300000  |
| C | 11.40300000 | 1.40600000  | 7.39300000  |
| C | 9.61500000  | 9.86700000  | 4.85600000  |
| C | 9.75900000  | 11.09900000 | 4.14300000  |
| C | 9.65100000  | 12.24200000 | 4.99500000  |
| C | 9.97800000  | 11.17800000 | 2.76200000  |
| C | 10.13300000 | 12.48600000 | 2.21600000  |
| C | 10.05700000 | 13.59700000 | 3.04100000  |
| C | 9.80800000  | 13.49700000 | 4.43700000  |
| C | 10.01800000 | 9.94000000  | 2.05400000  |

|   |             |             |             |
|---|-------------|-------------|-------------|
| C | 9.85400000  | 8.74500000  | 2.73400000  |
| C | 9.65500000  | 8.68500000  | 4.14100000  |
| H | 7.59600000  | 5.80900000  | 9.15400000  |
| H | 8.46400000  | 17.41200000 | 10.50900000 |
| H | 7.00800000  | 9.36900000  | 8.63100000  |
| H | 11.83500000 | 6.15000000  | 8.58200000  |
| H | 10.92200000 | 12.37200000 | 9.42500000  |
| H | 10.01500000 | 15.83000000 | 10.07300000 |
| H | 7.07200000  | 8.85800000  | 10.98000000 |
| H | 7.78700000  | 2.72200000  | 8.86100000  |
| H | 4.93600000  | 17.25900000 | 9.16500000  |
| H | 4.88800000  | 9.93300000  | 7.51900000  |
| H | 6.16100000  | 15.44700000 | 8.22600000  |
| H | 6.82200000  | 12.04400000 | 6.93100000  |
| H | 13.02900000 | 15.36800000 | 9.93200000  |
| H | 6.07800000  | 1.95400000  | 10.48300000 |
| H | 10.91800000 | 4.41300000  | 9.93400000  |
| H | 4.72400000  | 6.51000000  | 8.24800000  |
| H | 11.94500000 | 6.20800000  | 6.23200000  |
| H | 6.11600000  | 11.59100000 | 4.76500000  |
| H | 13.68900000 | 16.15300000 | 12.18900000 |
| H | 2.99900000  | 16.76000000 | 10.61700000 |
| H | 7.60300000  | 16.55000000 | 12.47600000 |
| H | 3.67300000  | 9.93100000  | 5.36500000  |
| H | 3.38900000  | 5.62200000  | 10.13800000 |
| H | 6.49000000  | 19.56800000 | 10.27300000 |
| H | 5.72200000  | 7.97700000  | 12.89500000 |
| H | 11.79300000 | 9.54500000  | 10.16500000 |
| H | 9.81500000  | 4.85300000  | 12.00700000 |
| H | 13.12600000 | 10.33900000 | 5.86600000  |
| H | 5.92200000  | 12.07600000 | 9.41600000  |

|   |             |             |             |
|---|-------------|-------------|-------------|
| H | 5.65700000  | 16.10100000 | 13.94800000 |
| H | 14.49300000 | 7.48000000  | 7.51000000  |
| H | 3.34200000  | 16.19300000 | 13.02100000 |
| H | 11.68500000 | 9.71900000  | 7.58900000  |
| H | 10.21500000 | 12.62800000 | 11.68400000 |
| H | 13.47100000 | 9.39200000  | 11.98500000 |
| H | 6.24000000  | 2.60900000  | 12.88200000 |
| H | 6.38300000  | 21.53400000 | 8.77800000  |
| H | 12.62300000 | 15.17400000 | 14.22100000 |
| H | 3.87700000  | 6.34900000  | 12.47400000 |
| H | 6.75400000  | 15.68800000 | 5.94300000  |
| H | 11.61400000 | 2.20800000  | 9.38400000  |
| H | 13.21300000 | 11.85800000 | 8.84900000  |
| H | 4.02500000  | 14.04200000 | 6.08100000  |
| H | 10.88900000 | 13.39600000 | 13.96700000 |
| H | 7.29000000  | 6.61900000  | 6.18300000  |
| H | 8.12200000  | 4.06500000  | 13.63700000 |
| H | 7.34100000  | 21.41800000 | 6.47400000  |
| H | 8.51700000  | 17.33500000 | 7.20000000  |
| H | 11.33000000 | 15.42100000 | 7.32900000  |
| H | 1.84200000  | 13.90900000 | 7.24200000  |
| H | 8.98900000  | 4.37600000  | 6.74800000  |
| H | 16.15800000 | 7.31000000  | 9.33300000  |
| H | 12.89700000 | 5.73800000  | 4.00800000  |
| H | 4.24900000  | 8.25600000  | 3.60000000  |
| H | 14.06700000 | 9.87100000  | 3.62600000  |
| H | 15.01700000 | 12.08800000 | 7.16800000  |
| H | 5.91500000  | 12.30200000 | 2.40500000  |
| H | 3.73300000  | 11.92600000 | 10.57000000 |
| H | 13.96500000 | 7.56100000  | 2.68000000  |
| H | 9.44800000  | 2.73700000  | 4.94500000  |

|   |             |             |             |
|---|-------------|-------------|-------------|
| H | 1.67700000  | 12.84500000 | 9.49200000  |
| H | 15.66200000 | 8.26200000  | 11.58400000 |
| H | 14.99000000 | 13.99300000 | 5.55300000  |
| H | 6.54100000  | 16.40000000 | 3.59200000  |
| H | 13.13600000 | 15.65700000 | 5.64500000  |
| H | 8.40700000  | 19.29900000 | 5.69800000  |
| H | 6.11300000  | 14.71700000 | 1.79800000  |
| H | 6.07200000  | 6.60800000  | 4.02100000  |
| H | 11.00100000 | 0.82800000  | 5.34700000  |
| H | 12.09000000 | 0.57800000  | 7.57900000  |
| H | 10.17800000 | 9.93800000  | 0.97300000  |
| H | 9.88700000  | 7.80700000  | 2.17600000  |
| H | 9.55000000  | 7.71600000  | 4.63000000  |
| H | 10.31200000 | 12.61000000 | 1.14500000  |
| H | 10.17900000 | 14.59200000 | 2.60700000  |
| H | 9.73700000  | 14.40300000 | 5.04000000  |

IM1-BIAN-IPr# (IM1-L<sub>B</sub>)

|    |             |             |             |
|----|-------------|-------------|-------------|
| Pd | 9.23000000  | 10.57800000 | 10.54700000 |
| N  | 9.26200000  | 11.98900000 | 7.75500000  |
| N  | 9.32900000  | 9.78900000  | 7.61400000  |
| C  | 8.48900000  | 6.30800000  | 8.72500000  |
| C  | 9.21800000  | 10.83200000 | 8.54000000  |
| C  | 8.30700000  | 7.63800000  | 8.31900000  |
| C  | 9.75200000  | 5.71800000  | 8.80200000  |
| C  | 11.82800000 | 14.30000000 | 10.50500000 |
| C  | 9.43400000  | 11.66500000 | 6.41700000  |
| C  | 8.11700000  | 15.83600000 | 9.20200000  |
| C  | 9.44800000  | 10.28500000 | 6.32500000  |
| C  | 7.68600000  | 17.16700000 | 9.81300000  |
| C  | 9.83300000  | 14.10200000 | 8.94500000  |
| C  | 6.90400000  | 8.23200000  | 8.21100000  |

|   |             |             |             |
|---|-------------|-------------|-------------|
| C | 6.34300000  | 8.23400000  | 6.78600000  |
| C | 10.86200000 | 6.49000000  | 8.45500000  |
| C | 11.25100000 | 13.61800000 | 9.25500000  |
| C | 9.41500000  | 15.36000000 | 9.39800000  |
| C | 5.84400000  | 7.59800000  | 9.11700000  |
| C | 5.36100000  | 8.30800000  | 10.22300000 |
| C | 10.24900000 | 3.31700000  | 8.08400000  |
| C | 7.72700000  | 3.14000000  | 9.72400000  |
| C | 5.14700000  | 17.06600000 | 10.18800000 |
| C | 8.90700000  | 3.73900000  | 10.18900000 |
| C | 5.33600000  | 9.15800000  | 6.46700000  |
| C | 7.22800000  | 15.03500000 | 8.48400000  |
| C | 6.57600000  | 13.02600000 | 7.12500000  |
| C | 12.94800000 | 15.14200000 | 10.48000000 |
| C | 6.48400000  | 13.52600000 | 5.67900000  |
| C | 7.55700000  | 18.32100000 | 8.81500000  |
| C | 6.45200000  | 16.96300000 | 10.69200000 |
| C | 5.20300000  | 12.98900000 | 7.81300000  |
| C | 8.90700000  | 13.31100000 | 8.22900000  |
| C | 10.74600000 | 7.81500000  | 8.02800000  |
| C | 6.75700000  | 2.68300000  | 10.62000000 |
| C | 9.98200000  | 4.27200000  | 9.24700000  |
| C | 7.60200000  | 13.79200000 | 7.95900000  |
| C | 5.25000000  | 6.36100000  | 8.81200000  |
| C | 12.41600000 | 8.27600000  | 6.15200000  |
| C | 12.27400000 | 7.01400000  | 5.55700000  |
| C | 6.25100000  | 12.59700000 | 4.65500000  |
| C | 13.41900000 | 15.74300000 | 11.65300000 |
| C | 4.04400000  | 16.79300000 | 11.00000000 |
| C | 12.20300000 | 13.71300000 | 8.06900000  |
| C | 6.62100000  | 16.59700000 | 12.03500000 |

|   |             |             |             |
|---|-------------|-------------|-------------|
| C | 4.69900000  | 9.12800000  | 5.22700000  |
| C | 4.23100000  | 5.83600000  | 9.60700000  |
| C | 7.04300000  | 19.55400000 | 9.25100000  |
| C | 13.18300000 | 8.36700000  | 8.55500000  |
| C | 4.31600000  | 7.80100000  | 11.00300000 |
| C | 13.26000000 | 9.15000000  | 9.71600000  |
| C | 9.09100000  | 3.85600000  | 11.57500000 |
| C | 13.02300000 | 9.29800000  | 5.40600000  |
| C | 5.09500000  | 12.39200000 | 9.08000000  |
| C | 5.52000000  | 16.33200000 | 12.85200000 |
| C | 14.21800000 | 7.45500000  | 8.29900000  |
| C | 4.22600000  | 16.42300000 | 12.33500000 |
| C | 12.00200000 | 8.57100000  | 7.59500000  |
| C | 11.19600000 | 14.07800000 | 11.73900000 |
| C | 14.35100000 | 9.04800000  | 10.58100000 |
| C | 6.95200000  | 2.81000000  | 11.99700000 |
| C | 6.98000000  | 20.65300000 | 8.39500000  |
| C | 12.78300000 | 15.51000000 | 12.87300000 |
| C | 9.45600000  | 8.39800000  | 7.99100000  |
| C | 3.75300000  | 6.55800000  | 10.70400000 |
| C | 6.56300000  | 14.88200000 | 5.33300000  |
| C | 11.09700000 | 2.21600000  | 8.28700000  |
| C | 13.23800000 | 12.77400000 | 7.94500000  |
| C | 4.04500000  | 13.50500000 | 7.21900000  |
| C | 11.66600000 | 14.66900000 | 12.91100000 |
| C | 6.69700000  | 7.27700000  | 5.82600000  |
| C | 8.12500000  | 3.40100000  | 12.47300000 |
| C | 7.43100000  | 20.54400000 | 7.07600000  |
| C | 8.00800000  | 18.22600000 | 7.49200000  |
| C | 12.14500000 | 14.76500000 | 7.14400000  |
| C | 2.81000000  | 13.43100000 | 7.87200000  |

|   |             |             |             |
|---|-------------|-------------|-------------|
| C | 9.65400000  | 3.47300000  | 6.82500000  |
| C | 15.30400000 | 7.33900000  | 9.17200000  |
| C | 12.74600000 | 6.77500000  | 4.26200000  |
| C | 5.05800000  | 8.16600000  | 4.27700000  |
| C | 13.48900000 | 9.06500000  | 4.11200000  |
| C | 14.19600000 | 12.88700000 | 6.93600000  |
| C | 6.09300000  | 13.00600000 | 3.33000000  |
| C | 3.86400000  | 12.31500000 | 9.73100000  |
| C | 13.36200000 | 7.79700000  | 3.53800000  |
| C | 9.88800000  | 2.54900000  | 5.80200000  |
| C | 2.71300000  | 12.83500000 | 9.13000000  |
| C | 15.38200000 | 8.14300000  | 10.31000000 |
| C | 14.13400000 | 13.94700000 | 6.02700000  |
| C | 6.40400000  | 15.29700000 | 4.00800000  |
| C | 13.10200000 | 14.88100000 | 6.13100000  |
| C | 7.94500000  | 19.32700000 | 6.62900000  |
| C | 6.16500000  | 14.36200000 | 3.00000000  |
| C | 6.05900000  | 7.24200000  | 4.58100000  |
| C | 10.72800000 | 1.45600000  | 6.01900000  |
| C | 11.33700000 | 1.29400000  | 7.26700000  |
| C | 9.57600000  | 9.88200000  | 4.92800000  |
| C | 9.70400000  | 11.12100000 | 4.22700000  |
| C | 9.63900000  | 12.25400000 | 5.09800000  |
| C | 9.88000000  | 11.21400000 | 2.84000000  |
| C | 10.03300000 | 12.52600000 | 2.30400000  |
| C | 9.99700000  | 13.62700000 | 3.14400000  |
| C | 9.79500000  | 13.51300000 | 4.54800000  |
| C | 9.89500000  | 9.98800000  | 2.11400000  |
| C | 9.74700000  | 8.78500000  | 2.78400000  |
| C | 9.59000000  | 8.71000000  | 4.19500000  |
| C | 10.26000000 | 9.86200000  | 12.42200000 |

|   |             |             |             |
|---|-------------|-------------|-------------|
| C | 10.30300000 | 8.46200000  | 12.15400000 |
| C | 9.18000000  | 7.65800000  | 12.28100000 |
| C | 7.94400000  | 8.22200000  | 12.62500000 |
| C | 7.80300000  | 9.59500000  | 12.83100000 |
| C | 8.97400000  | 10.41300000 | 12.73300000 |
| C | 6.49100000  | 10.18100000 | 13.26500000 |
| C | 11.54600000 | 10.59300000 | 12.72800000 |
| H | 7.61600000  | 5.72900000  | 9.02500000  |
| H | 8.50300000  | 17.45700000 | 10.49900000 |
| H | 6.99000000  | 9.28400000  | 8.53100000  |
| H | 11.86100000 | 6.05100000  | 8.53500000  |
| H | 11.15000000 | 12.54500000 | 9.51100000  |
| H | 10.12200000 | 15.96600000 | 9.96700000  |
| H | 5.80500000  | 9.27500000  | 10.46700000 |
| H | 7.57000000  | 3.01200000  | 8.65100000  |
| H | 4.98700000  | 17.37200000 | 9.15100000  |
| H | 5.03300000  | 9.89600000  | 7.21500000  |
| H | 6.19400000  | 15.35900000 | 8.35400000  |
| H | 6.90800000  | 11.97700000 | 7.06300000  |
| H | 13.46300000 | 15.33400000 | 9.53700000  |
| H | 5.84300000  | 2.22100000  | 10.23900000 |
| H | 10.91600000 | 4.29300000  | 9.83800000  |
| H | 5.56800000  | 5.81200000  | 7.92300000  |
| H | 11.77900000 | 6.20700000  | 6.10000000  |
| H | 6.19700000  | 11.53300000 | 4.89800000  |
| H | 14.29400000 | 16.39600000 | 11.60800000 |
| H | 3.03700000  | 16.86800000 | 10.58500000 |
| H | 7.63200000  | 16.51100000 | 12.44400000 |
| H | 3.91300000  | 9.85400000  | 5.00700000  |
| H | 3.79000000  | 4.87100000  | 9.35200000  |
| H | 6.68500000  | 19.65000000 | 10.27900000 |

|   |             |             |             |
|---|-------------|-------------|-------------|
| H | 3.92900000  | 8.38900000  | 11.84000000 |
| H | 12.44700000 | 9.84800000  | 9.94000000  |
| H | 10.01200000 | 4.30700000  | 11.95600000 |
| H | 13.12100000 | 10.29500000 | 5.84500000  |
| H | 5.99300000  | 11.99400000 | 9.56300000  |
| H | 5.67600000  | 16.05000000 | 13.89600000 |
| H | 14.19000000 | 6.84500000  | 7.39500000  |
| H | 3.36300000  | 16.20900000 | 12.96800000 |
| H | 11.76900000 | 9.64600000  | 7.63400000  |
| H | 10.31600000 | 13.43300000 | 11.77900000 |
| H | 14.40400000 | 9.69000000  | 11.46300000 |
| H | 6.19600000  | 2.44800000  | 12.69600000 |
| H | 6.58100000  | 21.60100000 | 8.76300000  |
| H | 13.15400000 | 15.97700000 | 13.78800000 |
| H | 2.94300000  | 6.16000000  | 11.31600000 |
| H | 6.75400000  | 15.63200000 | 6.10200000  |
| H | 11.57400000 | 2.07800000  | 9.26100000  |
| H | 13.30400000 | 11.94900000 | 8.66000000  |
| H | 4.10100000  | 13.96700000 | 6.23200000  |
| H | 11.15900000 | 14.46700000 | 13.85700000 |
| H | 7.47900000  | 6.54900000  | 6.05300000  |
| H | 8.29100000  | 3.50700000  | 13.54800000 |
| H | 7.38700000  | 21.40500000 | 6.40600000  |
| H | 8.42500000  | 17.28400000 | 7.13100000  |
| H | 11.34900000 | 15.50800000 | 7.22200000  |
| H | 1.92000000  | 13.83900000 | 7.38800000  |
| H | 9.00700000  | 4.33400000  | 6.64000000  |
| H | 16.10300000 | 6.62900000  | 8.94700000  |
| H | 12.63000000 | 5.78300000  | 3.82100000  |
| H | 4.55800000  | 8.13800000  | 3.30800000  |
| H | 13.95100000 | 9.88000000  | 3.54900000  |

|    |             |             |             |
|----|-------------|-------------|-------------|
| H  | 14.99800000 | 12.14900000 | 6.86600000  |
| H  | 5.92200000  | 12.26000000 | 2.55100000  |
| H  | 3.80200000  | 11.84500000 | 10.71500000 |
| H  | 13.72900000 | 7.61100000  | 2.52700000  |
| H  | 9.41100000  | 2.68700000  | 4.82900000  |
| H  | 1.74900000  | 12.77400000 | 9.63800000  |
| H  | 16.24200000 | 8.07100000  | 10.97900000 |
| H  | 14.88500000 | 14.04000000 | 5.24000000  |
| H  | 6.46800000  | 16.36000000 | 3.76600000  |
| H  | 13.04400000 | 15.71100000 | 5.42300000  |
| H  | 8.30500000  | 19.22800000 | 5.60200000  |
| H  | 6.04200000  | 14.68500000 | 1.96400000  |
| H  | 6.34600000  | 6.48600000  | 3.84600000  |
| H  | 10.91400000 | 0.73600000  | 5.22000000  |
| H  | 12.00100000 | 0.44500000  | 7.44700000  |
| H  | 10.02500000 | 10.00300000 | 1.02900000  |
| H  | 9.76400000  | 7.85400000  | 2.21400000  |
| H  | 9.49600000  | 7.73500000  | 4.67100000  |
| H  | 10.18000000 | 12.65800000 | 1.22900000  |
| H  | 10.11800000 | 14.62500000 | 2.71900000  |
| H  | 9.76300000  | 14.41500000 | 5.16000000  |
| H  | 11.27100000 | 8.02400000  | 11.89500000 |
| H  | 7.06100000  | 7.58500000  | 12.71500000 |
| H  | 5.68500000  | 9.44100000  | 13.17100000 |
| H  | 6.22800000  | 11.07300000 | 12.67700000 |
| H  | 6.53400000  | 10.50200000 | 14.31800000 |
| H  | 12.40200000 | 9.92800000  | 12.55300000 |
| H  | 11.55900000 | 10.89800000 | 13.78700000 |
| H  | 11.68100000 | 11.50700000 | 12.13700000 |
| H  | 9.25000000  | 6.58500000  | 12.09800000 |
| Cl | 8.89300000  | 11.99700000 | 13.51400000 |

TS1-BIAN-IPr# (TS1-LB)

|    |             |             |             |
|----|-------------|-------------|-------------|
| Pd | 8.87400000  | 10.65300000 | 10.47200000 |
| N  | 9.22500000  | 12.01800000 | 7.72300000  |
| N  | 9.28700000  | 9.81700000  | 7.57700000  |
| C  | 8.46400000  | 6.34800000  | 8.72600000  |
| C  | 9.11200000  | 10.85400000 | 8.50200000  |
| C  | 8.27700000  | 7.66700000  | 8.29100000  |
| C  | 9.73000000  | 5.76800000  | 8.82100000  |
| C  | 11.84500000 | 14.33500000 | 10.44600000 |
| C  | 9.46300000  | 11.69800000 | 6.39200000  |
| C  | 8.11300000  | 15.87900000 | 9.17200000  |
| C  | 9.47500000  | 10.31800000 | 6.29900000  |
| C  | 7.69000000  | 17.21000000 | 9.79200000  |
| C  | 9.82000000  | 14.13300000 | 8.90700000  |
| C  | 6.86600000  | 8.24700000  | 8.15300000  |
| C  | 6.33700000  | 8.25600000  | 6.71800000  |
| C  | 10.83700000 | 6.54000000  | 8.46700000  |
| C  | 11.24100000 | 13.64900000 | 9.20900000  |
| C  | 9.40900000  | 15.39300000 | 9.36200000  |
| C  | 5.80600000  | 7.58500000  | 9.03700000  |
| C  | 5.34900000  | 8.25300000  | 10.17900000 |
| C  | 10.23300000 | 3.38300000  | 8.08200000  |
| C  | 7.71900000  | 3.16400000  | 9.70800000  |
| C  | 5.14900000  | 17.14600000 | 10.16700000 |
| C  | 8.88800000  | 3.77100000  | 10.18900000 |
| C  | 5.33400000  | 9.18000000  | 6.38100000  |
| C  | 7.22100000  | 15.08600000 | 8.45100000  |
| C  | 6.55900000  | 13.07800000 | 7.09000000  |
| C  | 12.95400000 | 15.19000000 | 10.38400000 |
| C  | 6.47800000  | 13.56900000 | 5.64100000  |
| C  | 7.56500000  | 18.37000000 | 8.80100000  |

|   |             |             |             |
|---|-------------|-------------|-------------|
| C | 6.45200000  | 17.00600000 | 10.66600000 |
| C | 5.18300000  | 13.04900000 | 7.77100000  |
| C | 8.88500000  | 13.34600000 | 8.19300000  |
| C | 10.71800000 | 7.86000000  | 8.02000000  |
| C | 6.74800000  | 2.68300000  | 10.58900000 |
| C | 9.96400000  | 4.32200000  | 9.25900000  |
| C | 7.58600000  | 13.84100000 | 7.92500000  |
| C | 5.21000000  | 6.35600000  | 8.70700000  |
| C | 12.39300000 | 8.30400000  | 6.13900000  |
| C | 12.25400000 | 7.03800000  | 5.55500000  |
| C | 6.25900000  | 12.62900000 | 4.62300000  |
| C | 13.46400000 | 15.78800000 | 11.54200000 |
| C | 4.04200000  | 16.87200000 | 10.97300000 |
| C | 12.18700000 | 13.73800000 | 8.01700000  |
| C | 6.61500000  | 16.60300000 | 12.00000000 |
| C | 4.71800000  | 9.14400000  | 5.13000000  |
| C | 4.21500000  | 5.80100000  | 9.51300000  |
| C | 7.09000000  | 19.61300000 | 9.25500000  |
| C | 13.17400000 | 8.38600000  | 8.52400000  |
| C | 4.33900000  | 7.70900000  | 10.97800000 |
| C | 13.30600000 | 9.19200000  | 9.66300000  |
| C | 9.06300000  | 3.87000000  | 11.57700000 |
| C | 13.01400000 | 9.31600000  | 5.39100000  |
| C | 5.07100000  | 12.46000000 | 9.04300000  |
| C | 5.51000000  | 16.33500000 | 12.81000000 |
| C | 14.17100000 | 7.43300000  | 8.26900000  |
| C | 4.21700000  | 16.46400000 | 12.29700000 |
| C | 11.98100000 | 8.60700000  | 7.58300000  |
| C | 11.26400000 | 14.09800000 | 11.70200000 |
| C | 14.40500000 | 9.06200000  | 10.51500000 |
| C | 6.93400000  | 2.78800000  | 11.96900000 |

|   |             |             |             |
|---|-------------|-------------|-------------|
| C | 7.02700000  | 20.71500000 | 8.40300000  |
| C | 12.87900000 | 15.54200000 | 12.78400000 |
| C | 9.42200000  | 8.43100000  | 7.96300000  |
| C | 3.77400000  | 6.47600000  | 10.65300000 |
| C | 6.55200000  | 14.92200000 | 5.28400000  |
| C | 11.06400000 | 2.26900000  | 8.27800000  |
| C | 13.21900000 | 12.79700000 | 7.89300000  |
| C | 4.02700000  | 13.55900000 | 7.16800000  |
| C | 11.77200000 | 14.69000000 | 12.85800000 |
| C | 6.71300000  | 7.30400000  | 5.76300000  |
| C | 8.09900000  | 3.38100000  | 12.46100000 |
| C | 7.43900000  | 20.60000000 | 7.07100000  |
| C | 7.98000000  | 18.27100000 | 7.46700000  |
| C | 12.13400000 | 14.79300000 | 7.09500000  |
| C | 2.78800000  | 13.48300000 | 7.81500000  |
| C | 9.65500000  | 3.56700000  | 6.81800000  |
| C | 15.26400000 | 7.28900000  | 9.12700000  |
| C | 12.73700000 | 6.78500000  | 4.26800000  |
| C | 5.09400000  | 8.18100000  | 4.18900000  |
| C | 13.48900000 | 9.07000000  | 4.10300000  |
| C | 14.17600000 | 12.90600000 | 6.88300000  |
| C | 6.11300000  | 13.02500000 | 3.29200000  |
| C | 3.83700000  | 12.38200000 | 9.68600000  |
| C | 13.35900000 | 7.79900000  | 3.53700000  |
| C | 9.89000000  | 2.65600000  | 5.78400000  |
| C | 2.68700000  | 12.89300000 | 9.07500000  |
| C | 15.39100000 | 8.10700000  | 10.25100000 |
| C | 14.11600000 | 13.96500000 | 5.97300000  |
| C | 6.40500000  | 15.32400000 | 3.95200000  |
| C | 13.09100000 | 14.90600000 | 6.08200000  |
| C | 7.91500000  | 19.37400000 | 6.60900000  |

|   |             |             |             |
|---|-------------|-------------|-------------|
| C | 6.18200000  | 14.37700000 | 2.95100000  |
| C | 6.09600000  | 7.26500000  | 4.50900000  |
| C | 10.71500000 | 1.54900000  | 5.99500000  |
| C | 11.30500000 | 1.36100000  | 7.24700000  |
| C | 9.61700000  | 9.91400000  | 4.90500000  |
| C | 9.75500000  | 11.15100000 | 4.20300000  |
| C | 9.68000000  | 12.28400000 | 5.07200000  |
| C | 9.92200000  | 11.24100000 | 2.81400000  |
| C | 10.05700000 | 12.55300000 | 2.27400000  |
| C | 10.00900000 | 13.65600000 | 3.11100000  |
| C | 9.81500000  | 13.54300000 | 4.51600000  |
| C | 9.92300000  | 10.01200000 | 2.09100000  |
| C | 9.76500000  | 8.81100000  | 2.76400000  |
| C | 9.61400000  | 8.74100000  | 4.17500000  |
| C | 10.23800000 | 9.60000000  | 12.70700000 |
| C | 10.44200000 | 8.25100000  | 13.02800000 |
| C | 9.38400000  | 7.41800000  | 13.39200000 |
| C | 8.08500000  | 7.92300000  | 13.42600000 |
| C | 7.80600000  | 9.26100000  | 13.11900000 |
| C | 8.89800000  | 10.08300000 | 12.72800000 |
| C | 6.40600000  | 9.78000000  | 13.29300000 |
| C | 11.42200000 | 10.50300000 | 12.49200000 |
| H | 7.59100000  | 5.76900000  | 9.02800000  |
| H | 8.50600000  | 17.49200000 | 10.48000000 |
| H | 6.93000000  | 9.29500000  | 8.48900000  |
| H | 11.83700000 | 6.10900000  | 8.55700000  |
| H | 11.14300000 | 12.57800000 | 9.46700000  |
| H | 10.12200000 | 15.99700000 | 9.92800000  |
| H | 5.79500000  | 9.22000000  | 10.42700000 |
| H | 7.57300000  | 3.05300000  | 8.63100000  |
| H | 4.99600000  | 17.48200000 | 9.13900000  |

|   |             |             |             |
|---|-------------|-------------|-------------|
| H | 5.01700000  | 9.92000000  | 7.12000000  |
| H | 6.18900000  | 15.41800000 | 8.32100000  |
| H | 6.88700000  | 12.02800000 | 7.03700000  |
| H | 13.43300000 | 15.39200000 | 9.42500000  |
| H | 5.84100000  | 2.22100000  | 10.19400000 |
| H | 10.89600000 | 4.33800000  | 9.85000000  |
| H | 5.51000000  | 5.83600000  | 7.79500000  |
| H | 11.75900000 | 6.23400000  | 6.10500000  |
| H | 6.20800000  | 11.56700000 | 4.87600000  |
| H | 14.33000000 | 16.45000000 | 11.46800000 |
| H | 3.03500000  | 16.97700000 | 10.56200000 |
| H | 7.62400000  | 16.49000000 | 12.40500000 |
| H | 3.93600000  | 9.86900000  | 4.89400000  |
| H | 3.77200000  | 4.84100000  | 9.23900000  |
| H | 6.76200000  | 19.71600000 | 10.29200000 |
| H | 3.98500000  | 8.25400000  | 11.85600000 |
| H | 12.53300000 | 9.93300000  | 9.88100000  |
| H | 9.97200000  | 4.33600000  | 11.96700000 |
| H | 13.12000000 | 10.31400000 | 5.82300000  |
| H | 5.96800000  | 12.06500000 | 9.53100000  |
| H | 5.66100000  | 16.02300000 | 13.84600000 |
| H | 14.11100000 | 6.81200000  | 7.37300000  |
| H | 3.35100000  | 16.24900000 | 12.92600000 |
| H | 11.75900000 | 9.68400000  | 7.62700000  |
| H | 10.39700000 | 13.44000000 | 11.76800000 |
| H | 14.50000000 | 9.71800000  | 11.38300000 |
| H | 6.17900000  | 2.40500000  | 12.65700000 |
| H | 6.66200000  | 21.67200000 | 8.78300000  |
| H | 13.28100000 | 16.00600000 | 13.68700000 |
| H | 2.98700000  | 6.04900000  | 11.27800000 |
| H | 6.72900000  | 15.68100000 | 6.04800000  |

|   |             |             |             |
|---|-------------|-------------|-------------|
| H | 11.52400000 | 2.11200000  | 9.25700000  |
| H | 13.28600000 | 11.97600000 | 8.61200000  |
| H | 4.08800000  | 14.01600000 | 6.17900000  |
| H | 11.30200000 | 14.48200000 | 13.82200000 |
| H | 7.49300000  | 6.57800000  | 6.00700000  |
| H | 8.26100000  | 3.46000000  | 13.53800000 |
| H | 7.39500000  | 21.46400000 | 6.40500000  |
| H | 8.36700000  | 17.32100000 | 7.09300000  |
| H | 11.34400000 | 15.54200000 | 7.18000000  |
| H | 1.90000000  | 13.88600000 | 7.32500000  |
| H | 9.01900000  | 4.43700000  | 6.63900000  |
| H | 16.03100000 | 6.54400000  | 8.90200000  |
| H | 12.62200000 | 5.78800000  | 3.83600000  |
| H | 4.60600000  | 8.14600000  | 3.21200000  |
| H | 13.95900000 | 9.87700000  | 3.53700000  |
| H | 14.97600000 | 12.16500000 | 6.81300000  |
| H | 5.95300000  | 12.27000000 | 2.52000000  |
| H | 3.77000000  | 11.91900000 | 10.67300000 |
| H | 13.73100000 | 7.60300000  | 2.52900000  |
| H | 9.42800000  | 2.81500000  | 4.80700000  |
| H | 1.72000000  | 12.82900000 | 9.57700000  |
| H | 16.25600000 | 8.01000000  | 10.90900000 |
| H | 14.86500000 | 14.05500000 | 5.18400000  |
| H | 6.46500000  | 16.38500000 | 3.70000000  |
| H | 13.03500000 | 15.73700000 | 5.37600000  |
| H | 8.24600000  | 19.27100000 | 5.57300000  |
| H | 6.07100000  | 14.69000000 | 1.91000000  |
| H | 6.40000000  | 6.51000000  | 3.77900000  |
| H | 10.90100000 | 0.83800000  | 5.18700000  |
| H | 11.95500000 | 0.50100000  | 7.42300000  |
| H | 10.04400000 | 10.02100000 | 1.00500000  |

|    |             |             |             |
|----|-------------|-------------|-------------|
| H  | 9.76500000  | 7.87800000  | 2.19700000  |
| H  | 9.50600000  | 7.76900000  | 4.65700000  |
| H  | 10.19200000 | 12.68500000 | 1.19800000  |
| H  | 10.10900000 | 14.65400000 | 2.68100000  |
| H  | 9.76400000  | 14.44600000 | 5.12400000  |
| H  | 11.46500000 | 7.86700000  | 13.02400000 |
| H  | 7.25800000  | 7.27700000  | 13.73200000 |
| H  | 5.75600000  | 9.43600000  | 12.47800000 |
| H  | 6.36800000  | 10.87500000 | 13.31000000 |
| H  | 5.97300000  | 9.40000000  | 14.23000000 |
| H  | 12.34500000 | 9.90900000  | 12.46200000 |
| H  | 11.51100000 | 11.24400000 | 13.30300000 |
| H  | 11.33800000 | 11.06800000 | 11.55300000 |
| H  | 9.57500000  | 6.38200000  | 13.67800000 |
| Cl | 8.64300000  | 11.85700000 | 12.74400000 |

IM2-BIAN-IPr# (IM2-L<sub>B</sub>)

|    |             |             |             |
|----|-------------|-------------|-------------|
| Pd | 8.93000000  | 10.54300000 | 10.58800000 |
| N  | 9.17600000  | 12.03900000 | 7.69000000  |
| N  | 9.29700000  | 9.84700000  | 7.57400000  |
| C  | 8.47600000  | 6.38700000  | 8.74500000  |
| C  | 9.11000000  | 10.89200000 | 8.47600000  |
| C  | 8.29400000  | 7.71000000  | 8.32100000  |
| C  | 9.73700000  | 5.79400000  | 8.81100000  |
| C  | 11.70500000 | 14.24700000 | 10.53400000 |
| C  | 9.41400000  | 11.70700000 | 6.36100000  |
| C  | 8.08700000  | 15.91400000 | 9.09700000  |
| C  | 9.45200000  | 10.32700000 | 6.28400000  |
| C  | 7.66600000  | 17.23800000 | 9.73100000  |
| C  | 9.76400000  | 14.13800000 | 8.88600000  |
| C  | 6.88200000  | 8.29200000  | 8.21000000  |
| C  | 6.31900000  | 8.29000000  | 6.78900000  |

|   |             |             |             |
|---|-------------|-------------|-------------|
| C | 10.84600000 | 6.55700000  | 8.43800000  |
| C | 11.15900000 | 13.61600000 | 9.24300000  |
| C | 9.36700000  | 15.40600000 | 9.32900000  |
| C | 5.85200000  | 7.64500000  | 9.13700000  |
| C | 5.51400000  | 8.29000000  | 10.33100000 |
| C | 10.24600000 | 3.40500000  | 8.08300000  |
| C | 7.68800000  | 3.25200000  | 9.69100000  |
| C | 5.13200000  | 17.13800000 | 10.13600000 |
| C | 8.88900000  | 3.78800000  | 10.17800000 |
| C | 5.31400000  | 9.22000000  | 6.47500000  |
| C | 7.19900000  | 15.14000000 | 8.35100000  |
| C | 6.52500000  | 13.13700000 | 6.98700000  |
| C | 12.81100000 | 15.10800000 | 10.54600000 |
| C | 6.46800000  | 13.61600000 | 5.53300000  |
| C | 7.52900000  | 18.41200000 | 8.75900000  |
| C | 6.44200000  | 17.01600000 | 10.62000000 |
| C | 5.13200000  | 13.12700000 | 7.63900000  |
| C | 8.83600000  | 13.37700000 | 8.14100000  |
| C | 10.73700000 | 7.88000000  | 8.00000000  |
| C | 6.72700000  | 2.74300000  | 10.56600000 |
| C | 9.96700000  | 4.35000000  | 9.25400000  |
| C | 7.55200000  | 13.88800000 | 7.83500000  |
| C | 5.18600000  | 6.45200000  | 8.81600000  |
| C | 12.40200000 | 8.30800000  | 6.09400000  |
| C | 12.25200000 | 7.04300000  | 5.51200000  |
| C | 6.23300000  | 12.67300000 | 4.52000000  |
| C | 13.27200000 | 15.66600000 | 11.74400000 |
| C | 4.04000000  | 16.85200000 | 10.95800000 |
| C | 12.15800000 | 13.72700000 | 8.09600000  |
| C | 6.63100000  | 16.60800000 | 11.94800000 |
| C | 4.66900000  | 9.18500000  | 5.24000000  |

|   |             |             |             |
|---|-------------|-------------|-------------|
| C | 4.22700000  | 5.91300000  | 9.67700000  |
| C | 7.01700000  | 19.63400000 | 9.22800000  |
| C | 13.20700000 | 8.38000000  | 8.46800000  |
| C | 4.54000000  | 7.76800000  | 11.18500000 |
| C | 13.36400000 | 9.19400000  | 9.59600000  |
| C | 9.10600000  | 3.79000000  | 11.56200000 |
| C | 13.02600000 | 9.31700000  | 5.34400000  |
| C | 4.97800000  | 12.51900000 | 8.89600000  |
| C | 5.54100000  | 16.32900000 | 12.77400000 |
| C | 14.19200000 | 7.41300000  | 8.21100000  |
| C | 4.24100000  | 16.44800000 | 12.28000000 |
| C | 12.00300000 | 8.61200000  | 7.54100000  |
| C | 11.07000000 | 13.95800000 | 11.75300000 |
| C | 14.47000000 | 9.06400000  | 10.43900000 |
| C | 6.95700000  | 2.74600000  | 11.94400000 |
| C | 6.95200000  | 20.75400000 | 8.40100000  |
| C | 12.63600000 | 15.36800000 | 12.95000000 |
| C | 9.44200000  | 8.46100000  | 7.96900000  |
| C | 3.89900000  | 6.57100000  | 10.86300000 |
| C | 6.57200000  | 14.96500000 | 5.16700000  |
| C | 11.09200000 | 2.30500000  | 8.28700000  |
| C | 13.20600000 | 12.79800000 | 8.01600000  |
| C | 3.99800000  | 13.66600000 | 7.01500000  |
| C | 11.53200000 | 14.51000000 | 12.94800000 |
| C | 6.67100000  | 7.33500000  | 5.82900000  |
| C | 8.15300000  | 3.26900000  | 12.44000000 |
| C | 7.39800000  | 20.67800000 | 7.07800000  |
| C | 7.97600000  | 18.35000000 | 7.43300000  |
| C | 12.12800000 | 14.77600000 | 7.16800000  |
| C | 2.74200000  | 13.59300000 | 7.62700000  |
| C | 9.65500000  | 3.56800000  | 6.82200000  |

|   |             |             |             |
|---|-------------|-------------|-------------|
| C | 15.29500000 | 7.27000000  | 9.05700000  |
| C | 12.73800000 | 6.78400000  | 4.22700000  |
| C | 5.02100000  | 8.21900000  | 4.29100000  |
| C | 13.50500000 | 9.06400000  | 4.05800000  |
| C | 14.20200000 | 12.91600000 | 7.04700000  |
| C | 6.10000000  | 13.06400000 | 3.18600000  |
| C | 3.72500000  | 12.44000000 | 9.50200000  |
| C | 13.37000000 | 7.79100000  | 3.49600000  |
| C | 9.88800000  | 2.64300000  | 5.80000000  |
| C | 2.59800000  | 12.97400000 | 8.86800000  |
| C | 15.44300000 | 8.09900000  | 10.17200000 |
| C | 14.16700000 | 13.97200000 | 6.13100000  |
| C | 6.43600000  | 15.36000000 | 3.83200000  |
| C | 13.12500000 | 14.89900000 | 6.19500000  |
| C | 7.91000000  | 19.47200000 | 6.59900000  |
| C | 6.19700000  | 14.41200000 | 2.83600000  |
| C | 6.02500000  | 7.29800000  | 4.59000000  |
| C | 10.72400000 | 1.54700000  | 6.01900000  |
| C | 11.33000000 | 1.38300000  | 7.26800000  |
| C | 9.60300000  | 9.90600000  | 4.89500000  |
| C | 9.73300000  | 11.13700000 | 4.18300000  |
| C | 9.64100000  | 12.28200000 | 5.03500000  |
| C | 9.91800000  | 11.21000000 | 2.79600000  |
| C | 10.06400000 | 12.51300000 | 2.24100000  |
| C | 10.00800000 | 13.62700000 | 3.06300000  |
| C | 9.79000000  | 13.53300000 | 4.46500000  |
| C | 9.93500000  | 9.97400000  | 2.08700000  |
| C | 9.77600000  | 8.78000000  | 2.77000000  |
| C | 9.61200000  | 8.72400000  | 4.18000000  |
| C | 10.37900000 | 9.30200000  | 12.58900000 |
| C | 10.61600000 | 8.07100000  | 13.22800000 |

|   |             |             |             |
|---|-------------|-------------|-------------|
| C | 9.55800000  | 7.33600000  | 13.76000000 |
| C | 8.27000000  | 7.87700000  | 13.74700000 |
| C | 7.98700000  | 9.09500000  | 13.10800000 |
| C | 9.03600000  | 9.68600000  | 12.37200000 |
| C | 6.64600000  | 9.74500000  | 13.30700000 |
| C | 11.53500000 | 10.23900000 | 12.32500000 |
| H | 7.60200000  | 5.82100000  | 9.06400000  |
| H | 8.48700000  | 17.51500000 | 10.41700000 |
| H | 6.94700000  | 9.34500000  | 8.52700000  |
| H | 11.84300000 | 6.11300000  | 8.50800000  |
| H | 11.04300000 | 12.54000000 | 9.46200000  |
| H | 10.06800000 | 15.99500000 | 9.92600000  |
| H | 6.02100000  | 9.22800000  | 10.57300000 |
| H | 7.50600000  | 3.21700000  | 8.61400000  |
| H | 4.96300000  | 17.47000000 | 9.10800000  |
| H | 5.01700000  | 9.96300000  | 7.22100000  |
| H | 6.17700000  | 15.49000000 | 8.19700000  |
| H | 6.83200000  | 12.07900000 | 6.94300000  |
| H | 13.32500000 | 15.34600000 | 9.61300000  |
| H | 5.79200000  | 2.33800000  | 10.17100000 |
| H | 10.89500000 | 4.37200000  | 9.85200000  |
| H | 5.40300000  | 5.94800000  | 7.87100000  |
| H | 11.74900000 | 6.24500000  | 6.06000000  |
| H | 6.15400000  | 11.61500000 | 4.78000000  |
| H | 14.13400000 | 16.33700000 | 11.72800000 |
| H | 3.02600000  | 16.94500000 | 10.56300000 |
| H | 7.64700000  | 16.49400000 | 12.33500000 |
| H | 3.88600000  | 9.91400000  | 5.02200000  |
| H | 3.72100000  | 4.98300000  | 9.40900000  |
| H | 6.66400000  | 19.70400000 | 10.25900000 |
| H | 4.28700000  | 8.29400000  | 12.10800000 |

|   |             |             |             |
|---|-------------|-------------|-------------|
| H | 12.60200000 | 9.94500000  | 9.81200000  |
| H | 10.03800000 | 4.20200000  | 11.95700000 |
| H | 13.13900000 | 10.31600000 | 5.77200000  |
| H | 5.85400000  | 12.12800000 | 9.42100000  |
| H | 5.71000000  | 16.01300000 | 13.80500000 |
| H | 14.11300000 | 6.78400000  | 7.32400000  |
| H | 3.38600000  | 16.22500000 | 12.92200000 |
| H | 11.79300000 | 9.69200000  | 7.58500000  |
| H | 10.18800000 | 13.31200000 | 11.76200000 |
| H | 14.58300000 | 9.72500000  | 11.30200000 |
| H | 6.21000000  | 2.34000000  | 12.62700000 |
| H | 6.55600000  | 21.69300000 | 8.79400000  |
| H | 12.99700000 | 15.80400000 | 13.88400000 |
| H | 3.14100000  | 6.15900000  | 11.53100000 |
| H | 6.76100000  | 15.72500000 | 5.92700000  |
| H | 11.56200000 | 2.16600000  | 9.26500000  |
| H | 13.25700000 | 11.98100000 | 8.74100000  |
| H | 4.09200000  | 14.14300000 | 6.03900000  |
| H | 11.02300000 | 14.26600000 | 13.88200000 |
| H | 7.45200000  | 6.60600000  | 6.05500000  |
| H | 8.34800000  | 3.26900000  | 13.51400000 |
| H | 7.35300000  | 21.55500000 | 6.43000000  |
| H | 8.39100000  | 17.41700000 | 7.04700000  |
| H | 11.32400000 | 15.51300000 | 7.21500000  |
| H | 1.87200000  | 14.02400000 | 7.12400000  |
| H | 9.00700000  | 4.42700000  | 6.63700000  |
| H | 16.05300000 | 6.51600000  | 8.83400000  |
| H | 12.62000000 | 5.78700000  | 3.79700000  |
| H | 4.51200000  | 8.18700000  | 3.32600000  |
| H | 13.98100000 | 9.86600000  | 3.49000000  |
| H | 15.01300000 | 12.18400000 | 7.01400000  |

|    |             |             |             |
|----|-------------|-------------|-------------|
| H  | 5.92400000  | 12.30700000 | 2.41800000  |
| H  | 3.63000000  | 11.96400000 | 10.48000000 |
| H  | 13.75200000 | 7.58800000  | 2.49300000  |
| H  | 9.41300000  | 2.78200000  | 4.82600000  |
| H  | 1.61700000  | 12.91100000 | 9.34200000  |
| H  | 16.31300000 | 8.00400000  | 10.82500000 |
| H  | 14.94900000 | 14.07200000 | 5.37600000  |
| H  | 6.51800000  | 16.41800000 | 3.57300000  |
| H  | 13.09000000 | 15.72900000 | 5.48500000  |
| H  | 8.26500000  | 19.39900000 | 5.56800000  |
| H  | 6.09300000  | 14.72000000 | 1.79300000  |
| H  | 6.30700000  | 6.54200000  | 3.85500000  |
| H  | 10.90600000 | 0.82300000  | 5.22200000  |
| H  | 11.99000000 | 0.53200000  | 7.45000000  |
| H  | 10.07000000 | 9.97000000  | 1.00400000  |
| H  | 9.78600000  | 7.83900000  | 2.21500000  |
| H  | 9.50700000  | 7.75700000  | 4.67000000  |
| H  | 10.21600000 | 12.62800000 | 1.16600000  |
| H  | 10.11900000 | 14.61800000 | 2.62100000  |
| H  | 9.73500000  | 14.44400000 | 5.06000000  |
| H  | 11.64800000 | 7.71700000  | 13.33900000 |
| H  | 7.45300000  | 7.35400000  | 14.25000000 |
| H  | 6.08300000  | 9.87800000  | 12.37500000 |
| H  | 6.77700000  | 10.75600000 | 13.71900000 |
| H  | 6.03800000  | 9.15100000  | 14.00500000 |
| H  | 12.46700000 | 9.68900000  | 12.15000000 |
| H  | 11.69300000 | 10.87400000 | 13.21100000 |
| H  | 11.34900000 | 10.92800000 | 11.49000000 |
| H  | 9.74100000  | 6.37300000  | 14.24300000 |
| Cl | 7.75900000  | 12.34800000 | 11.38700000 |

IM3-BIAN-IPr# (IM3-LB)

|    |             |             |             |
|----|-------------|-------------|-------------|
| Pd | 8.73400000  | 10.20100000 | 10.35100000 |
| N  | 9.08000000  | 11.98400000 | 7.60400000  |
| N  | 9.24100000  | 9.80800000  | 7.36700000  |
| N  | 9.97000000  | 11.36000000 | 11.79000000 |
| C  | 8.41900000  | 6.35500000  | 8.56100000  |
| C  | 8.99900000  | 10.79500000 | 8.31400000  |
| C  | 8.23600000  | 7.66100000  | 8.08400000  |
| C  | 9.68600000  | 5.79300000  | 8.71600000  |
| C  | 11.83900000 | 14.22300000 | 10.17200000 |
| C  | 9.37200000  | 11.73300000 | 6.27100000  |
| C  | 7.99200000  | 15.82200000 | 9.10200000  |
| C  | 9.44600000  | 10.36100000 | 6.11100000  |
| C  | 7.61200000  | 17.17900000 | 9.68400000  |
| C  | 9.70200000  | 14.09900000 | 8.75200000  |
| C  | 6.81600000  | 8.18800000  | 7.84300000  |
| C  | 6.39800000  | 8.13700000  | 6.37300000  |
| C  | 10.79900000 | 6.56400000  | 8.36800000  |
| C  | 11.15800000 | 13.65000000 | 8.91600000  |
| C  | 9.30500000  | 15.35900000 | 9.21700000  |
| C  | 5.75100000  | 7.49900000  | 8.70100000  |
| C  | 5.40500000  | 8.04500000  | 9.94300000  |
| C  | 10.25700000 | 3.40600000  | 8.07400000  |
| C  | 7.82300000  | 2.92200000  | 9.65800000  |
| C  | 5.06500000  | 17.36400000 | 9.94400000  |
| C  | 8.77100000  | 3.85300000  | 10.10000000 |
| C  | 5.35300000  | 8.97200000  | 5.94800000  |
| C  | 7.06300000  | 15.00800000 | 8.45200000  |
| C  | 6.37500000  | 12.99100000 | 7.10000000  |
| C  | 13.13700000 | 14.75100000 | 10.13800000 |
| C  | 6.34000000  | 13.44400000 | 5.63500000  |
| C  | 7.60300000  | 18.31800000 | 8.66100000  |

|   |             |             |             |
|---|-------------|-------------|-------------|
| C | 6.32300000  | 17.09300000 | 10.50000000 |
| C | 4.98600000  | 13.00800000 | 7.75600000  |
| C | 8.73400000  | 13.29900000 | 8.10900000  |
| C | 10.69100000 | 7.86600000  | 7.87000000  |
| C | 6.79800000  | 2.48900000  | 10.50500000 |
| C | 9.90500000  | 4.36400000  | 9.21100000  |
| C | 7.41300000  | 13.76500000 | 7.91400000  |
| C | 5.08400000  | 6.34300000  | 8.27100000  |
| C | 12.38900000 | 8.20800000  | 5.98700000  |
| C | 12.21000000 | 6.92500000  | 5.45400000  |
| C | 6.21600000  | 12.47900000 | 4.62600000  |
| C | 13.74200000 | 15.25100000 | 11.29700000 |
| C | 3.90300000  | 17.22300000 | 10.70500000 |
| C | 11.96900000 | 13.93600000 | 7.65200000  |
| C | 6.38700000  | 16.69100000 | 11.84300000 |
| C | 4.86300000  | 8.89800000  | 4.64500000  |
| C | 4.10500000  | 5.74400000  | 9.06700000  |
| C | 7.33700000  | 19.62300000 | 9.10800000  |
| C | 13.15500000 | 8.46500000  | 8.35000000  |
| C | 4.41800000  | 7.45700000  | 10.73500000 |
| C | 13.44600000 | 9.49000000  | 9.26000000  |
| C | 8.66700000  | 4.34400000  | 11.41100000 |
| C | 13.07500000 | 9.15900000  | 5.21500000  |
| C | 4.79100000  | 12.30700000 | 8.95800000  |
| C | 5.22800000  | 16.55800000 | 12.60800000 |
| C | 14.02500000 | 7.36400000  | 8.29800000  |
| C | 3.97900000  | 16.82100000 | 12.04000000 |
| C | 11.95200000 | 8.60100000  | 7.40600000  |
| C | 11.16800000 | 14.19500000 | 11.40700000 |
| C | 14.55300000 | 9.41400000  | 10.10900000 |
| C | 6.71000000  | 2.97700000  | 11.81000000 |

|   |             |             |             |
|---|-------------|-------------|-------------|
| C | 7.35000000  | 20.70300000 | 8.22700000  |
| C | 13.05700000 | 15.24200000 | 12.51100000 |
| C | 9.38900000  | 8.42500000  | 7.76900000  |
| C | 3.76500000  | 6.30100000  | 10.30200000 |
| C | 6.39100000  | 14.79300000 | 5.25300000  |
| C | 11.11100000 | 2.32200000  | 8.32900000  |
| C | 12.83100000 | 12.96400000 | 7.12900000  |
| C | 3.89600000  | 13.69000000 | 7.19900000  |
| C | 11.76500000 | 14.70900000 | 12.56000000 |
| C | 6.93900000  | 7.22700000  | 5.45800000  |
| C | 7.64900000  | 3.91000000  | 12.25900000 |
| C | 7.63000000  | 20.50200000 | 6.87100000  |
| C | 7.89100000  | 18.13100000 | 7.30400000  |
| C | 11.93200000 | 15.19300000 | 7.03000000  |
| C | 2.64600000  | 13.67700000 | 7.82500000  |
| C | 9.73500000  | 3.54800000  | 6.78100000  |
| C | 15.12400000 | 7.27600000  | 9.15400000  |
| C | 12.71800000 | 6.59700000  | 4.19200000  |
| C | 5.40800000  | 7.98200000  | 3.73900000  |
| C | 13.57600000 | 8.83800000  | 3.95400000  |
| C | 13.63300000 | 13.23300000 | 6.01600000  |
| C | 6.13700000  | 12.84400000 | 3.28000000  |
| C | 3.54000000  | 12.27900000 | 9.57400000  |
| C | 13.40400000 | 7.55000000  | 3.43800000  |
| C | 10.05200000 | 2.63100000  | 5.77400000  |
| C | 2.46000000  | 12.96600000 | 9.01000000  |
| C | 15.39300000 | 8.30000000  | 10.06400000 |
| C | 13.58500000 | 14.48700000 | 5.40600000  |
| C | 6.31000000  | 15.16400000 | 3.90700000  |
| C | 12.73200000 | 15.46700000 | 5.92000000  |
| C | 7.90000000  | 19.21200000 | 6.41500000  |

|   |             |             |             |
|---|-------------|-------------|-------------|
| C | 6.18000000  | 14.19100000 | 2.91500000  |
| C | 6.44700000  | 7.14800000  | 4.15200000  |
| C | 10.90100000 | 1.55600000  | 6.04200000  |
| C | 11.43100000 | 1.40500000  | 7.32600000  |
| C | 9.68000000  | 10.04100000 | 4.70500000  |
| C | 9.80600000  | 11.32100000 | 4.08300000  |
| C | 9.63300000  | 12.40000000 | 5.00300000  |
| C | 10.06300000 | 11.50100000 | 2.71700000  |
| C | 10.18800000 | 12.84700000 | 2.26500000  |
| C | 10.04200000 | 13.89600000 | 3.15700000  |
| C | 9.75300000  | 13.69400000 | 4.53300000  |
| C | 10.16500000 | 10.31800000 | 1.92800000  |
| C | 10.01100000 | 9.07300000  | 2.51900000  |
| C | 9.77100000  | 8.91300000  | 3.91100000  |
| C | 9.90300000  | 8.61100000  | 12.37500000 |
| C | 9.97500000  | 7.65300000  | 13.39400000 |
| C | 8.86600000  | 7.38200000  | 14.19400000 |
| C | 7.68600000  | 8.09000000  | 13.99000000 |
| C | 7.57400000  | 9.06800000  | 12.98300000 |
| C | 8.67700000  | 9.27200000  | 12.12900000 |
| C | 6.28900000  | 9.85500000  | 12.91500000 |
| C | 11.16000000 | 8.95400000  | 11.61400000 |
| C | 10.82400000 | 11.70900000 | 14.03900000 |
| C | 10.59600000 | 11.90600000 | 15.39900000 |
| C | 9.29400000  | 12.00200000 | 15.90000000 |
| C | 8.22000000  | 11.89600000 | 15.01000000 |
| C | 8.43600000  | 11.69900000 | 13.64800000 |
| C | 9.74500000  | 11.60200000 | 13.13600000 |
| H | 7.53800000  | 5.77300000  | 8.83300000  |
| H | 8.41100000  | 17.43000000 | 10.40400000 |
| H | 6.81000000  | 9.25000000  | 8.14100000  |

|   |             |             |             |
|---|-------------|-------------|-------------|
| H | 11.79500000 | 6.13600000  | 8.49900000  |
| H | 11.13800000 | 12.55300000 | 9.04400000  |
| H | 10.04200000 | 15.98200000 | 9.72800000  |
| H | 5.92000000  | 8.94500000  | 10.28900000 |
| H | 7.89100000  | 2.52200000  | 8.64400000  |
| H | 4.99300000  | 17.70000000 | 8.90700000  |
| H | 4.90600000  | 9.67500000  | 6.65600000  |
| H | 6.02200000  | 15.33200000 | 8.37600000  |
| H | 6.68600000  | 11.93400000 | 7.08400000  |
| H | 13.69000000 | 14.78000000 | 9.19800000  |
| H | 6.06700000  | 1.76300000  | 10.14300000 |
| H | 10.80000000 | 4.40700000  | 9.85700000  |
| H | 5.31900000  | 5.91100000  | 7.29600000  |
| H | 11.66800000 | 6.16500000  | 6.02100000  |
| H | 6.18900000  | 11.42100000 | 4.89600000  |
| H | 14.75400000 | 15.65800000 | 11.24100000 |
| H | 2.93100000  | 17.43200000 | 10.25300000 |
| H | 7.36000000  | 16.47300000 | 12.29200000 |
| H | 4.04900000  | 9.55800000  | 4.33500000  |
| H | 3.59800000  | 4.84200000  | 8.71500000  |
| H | 7.11000000  | 19.79100000 | 10.16400000 |
| H | 4.15500000  | 7.90700000  | 11.69400000 |
| H | 12.79200000 | 10.36500000 | 9.31300000  |
| H | 9.38600000  | 5.08400000  | 11.77200000 |
| H | 13.21300000 | 10.16800000 | 5.60900000  |
| H | 5.63700000  | 11.79600000 | 9.42800000  |
| H | 5.30300000  | 16.24700000 | 13.65300000 |
| H | 13.86200000 | 6.57800000  | 7.55800000  |
| H | 3.07100000  | 16.71300000 | 12.63600000 |
| H | 11.71500000 | 9.67500000  | 7.37200000  |
| H | 10.16300000 | 13.77100000 | 11.46200000 |

|   |             |             |             |
|---|-------------|-------------|-------------|
| H | 14.75700000 | 10.23100000 | 10.80400000 |
| H | 5.91500000  | 2.63200000  | 12.47400000 |
| H | 7.14600000  | 21.70800000 | 8.60200000  |
| H | 13.52100000 | 15.64600000 | 13.41300000 |
| H | 2.99200000  | 5.84100000  | 10.92100000 |
| H | 6.49600000  | 15.57100000 | 6.01200000  |
| H | 11.52600000 | 2.19300000  | 9.33200000  |
| H | 12.88900000 | 11.98400000 | 7.61000000  |
| H | 4.02100000  | 14.23400000 | 6.26200000  |
| H | 11.21300000 | 14.69500000 | 13.50200000 |
| H | 7.75000000  | 6.56500000  | 5.77100000  |
| H | 7.59000000  | 4.30600000  | 13.27500000 |
| H | 7.64400000  | 21.34800000 | 6.18100000  |
| H | 8.11800000  | 17.12900000 | 6.93300000  |
| H | 11.27200000 | 15.97000000 | 7.42300000  |
| H | 1.81400000  | 14.22400000 | 7.37600000  |
| H | 9.07200000  | 4.38700000  | 6.55600000  |
| H | 15.78600000 | 6.40900000  | 9.09300000  |
| H | 12.57300000 | 5.58800000  | 3.80100000  |
| H | 5.02500000  | 7.92300000  | 2.71900000  |
| H | 14.09800000 | 9.59700000  | 3.37000000  |
| H | 14.30000000 | 12.46000000 | 5.62800000  |
| H | 6.05100000  | 12.06900000 | 2.51600000  |
| H | 3.40700000  | 11.72200000 | 10.50300000 |
| H | 13.79700000 | 7.29500000  | 2.45200000  |
| H | 9.63400000  | 2.76100000  | 4.77300000  |
| H | 1.48000000  | 12.94600000 | 9.49300000  |
| H | 16.26100000 | 8.23800000  | 10.72200000 |
| H | 14.20900000 | 14.70000000 | 4.53600000  |
| H | 6.35100000  | 16.22100000 | 3.63700000  |
| H | 12.68900000 | 16.45400000 | 5.45300000  |

|    |             |             |             |
|----|-------------|-------------|-------------|
| H  | 8.12500000  | 19.04000000 | 5.35900000  |
| H  | 6.12300000  | 14.48000000 | 1.86300000  |
| H  | 6.88200000  | 6.43000000  | 3.45300000  |
| H  | 11.15400000 | 0.84300000  | 5.25600000  |
| H  | 12.09800000 | 0.57000000  | 7.54900000  |
| H  | 10.36100000 | 10.39400000 | 0.85500000  |
| H  | 10.09000000 | 8.17700000  | 1.90100000  |
| H  | 9.67400000  | 7.91000000  | 4.32500000  |
| H  | 10.39900000 | 13.04700000 | 1.21200000  |
| H  | 10.14300000 | 14.92100000 | 2.79500000  |
| H  | 9.63100000  | 14.55400000 | 5.19200000  |
| H  | 10.92500000 | 7.13700000  | 13.56600000 |
| H  | 6.82200000  | 7.90000000  | 14.63300000 |
| H  | 6.13700000  | 10.33400000 | 11.94100000 |
| H  | 6.29600000  | 10.66800000 | 13.65900000 |
| H  | 5.42700000  | 9.21100000  | 13.15000000 |
| H  | 11.90900000 | 8.15300000  | 11.70200000 |
| H  | 11.60300000 | 9.87800000  | 12.01900000 |
| H  | 10.98800000 | 9.11800000  | 10.53800000 |
| H  | 8.93400000  | 6.64000000  | 14.99200000 |
| H  | 7.59000000  | 11.61100000 | 12.96200000 |
| H  | 11.84600000 | 11.62400000 | 13.66000000 |
| H  | 11.44900000 | 11.98300000 | 16.07700000 |
| H  | 7.19500000  | 11.96700000 | 15.38100000 |
| H  | 9.11900000  | 12.15700000 | 16.96500000 |
| H  | 10.87800000 | 11.65500000 | 11.43600000 |
| H  | 9.21100000  | 11.59700000 | 11.14600000 |
| Cl | 7.56500000  | 12.06900000 | 11.37200000 |

IM4-BIAN-IPr# (IM4-LB)

|    |            |             |             |
|----|------------|-------------|-------------|
| Pd | 9.18000000 | 10.26800000 | 10.72900000 |
| N  | 9.19400000 | 12.04600000 | 7.85700000  |

|   |             |             |             |
|---|-------------|-------------|-------------|
| N | 9.33800000  | 9.86000000  | 7.67500000  |
| N | 10.13500000 | 11.56100000 | 12.00200000 |
| C | 8.49100000  | 6.36900000  | 8.75300000  |
| C | 9.16400000  | 10.87100000 | 8.61700000  |
| C | 8.31600000  | 7.69400000  | 8.32700000  |
| C | 9.75200000  | 5.78600000  | 8.86700000  |
| C | 11.80900000 | 14.51700000 | 10.47600000 |
| C | 9.41100000  | 11.75300000 | 6.51400000  |
| C | 8.01700000  | 15.93200000 | 9.19900000  |
| C | 9.46300000  | 10.37700000 | 6.39600000  |
| C | 7.59200000  | 17.29200000 | 9.75100000  |
| C | 9.73300000  | 14.19000000 | 9.01500000  |
| C | 6.90200000  | 8.24600000  | 8.10900000  |
| C | 6.45600000  | 8.20200000  | 6.64300000  |
| C | 10.86900000 | 6.55700000  | 8.53300000  |
| C | 11.17600000 | 13.76300000 | 9.29400000  |
| C | 9.31200000  | 15.46400000 | 9.41700000  |
| C | 5.79900000  | 7.59700000  | 8.95500000  |
| C | 5.27600000  | 8.28100000  | 10.05900000 |
| C | 10.26000000 | 3.41000000  | 8.10800000  |
| C | 7.76800000  | 3.04900000  | 9.67300000  |
| C | 5.04600000  | 17.27500000 | 10.05900000 |
| C | 8.84900000  | 3.78400000  | 10.18200000 |
| C | 5.45500000  | 9.09300000  | 6.22400000  |
| C | 7.13500000  | 15.10500000 | 8.50100000  |
| C | 6.51000000  | 13.08800000 | 7.14500000  |
| C | 13.01200000 | 15.22400000 | 10.36000000 |
| C | 6.47000000  | 13.57000000 | 5.68800000  |
| C | 7.49900000  | 18.41600000 | 8.71500000  |
| C | 6.33300000  | 17.13200000 | 10.59900000 |
| C | 5.10900000  | 13.09700000 | 7.77100000  |

|   |             |             |             |
|---|-------------|-------------|-------------|
| C | 8.81600000  | 13.36800000 | 8.31900000  |
| C | 10.77000000 | 7.87900000  | 8.09000000  |
| C | 6.76700000  | 2.57400000  | 10.52400000 |
| C | 9.96300000  | 4.33300000  | 9.29000000  |
| C | 7.51600000  | 13.84700000 | 8.01200000  |
| C | 5.22800000  | 6.36000000  | 8.61400000  |
| C | 12.37500000 | 8.28000000  | 6.14000000  |
| C | 12.20000000 | 7.00900000  | 5.57600000  |
| C | 6.24200000  | 12.62600000 | 4.67600000  |
| C | 13.56000000 | 15.89100000 | 11.46200000 |
| C | 3.91100000  | 17.04700000 | 10.84500000 |
| C | 12.03600000 | 13.86100000 | 8.03800000  |
| C | 6.45300000  | 16.77500000 | 11.95500000 |
| C | 4.91700000  | 9.02000000  | 4.93800000  |
| C | 4.18800000  | 5.81500000  | 9.36900000  |
| C | 7.12200000  | 19.69900000 | 9.14800000  |
| C | 13.29600000 | 8.38300000  | 8.44800000  |
| C | 4.22300000  | 7.74900000  | 10.80800000 |
| C | 13.70900000 | 9.36600000  | 9.35800000  |
| C | 8.90200000  | 4.02800000  | 11.56200000 |
| C | 12.98000000 | 9.27500000  | 5.35700000  |
| C | 4.85600000  | 12.29200000 | 8.89500000  |
| C | 5.32200000  | 16.54600000 | 12.74400000 |
| C | 14.11700000 | 7.25300000  | 8.29100000  |
| C | 4.04300000  | 16.67400000 | 12.18700000 |
| C | 12.03200000 | 8.60500000  | 7.60200000  |
| C | 11.17600000 | 14.48500000 | 11.73100000 |
| C | 14.89100000 | 9.23400000  | 10.08800000 |
| C | 6.83500000  | 2.81600000  | 11.89700000 |
| C | 7.09500000  | 20.77800000 | 8.26600000  |
| C | 12.93000000 | 15.83800000 | 12.70500000 |

|   |             |             |             |
|---|-------------|-------------|-------------|
| C | 9.47400000  | 8.46100000  | 8.04000000  |
| C | 3.67800000  | 6.51100000  | 10.46900000 |
| C | 6.57800000  | 14.91900000 | 5.32100000  |
| C | 11.07700000 | 2.28500000  | 8.30500000  |
| C | 13.01100000 | 12.88700000 | 7.78500000  |
| C | 4.06000000  | 13.86900000 | 7.25400000  |
| C | 11.73800000 | 15.12100000 | 12.83800000 |
| C | 6.91100000  | 7.24100000  | 5.73100000  |
| C | 7.90700000  | 3.54700000  | 12.41300000 |
| C | 7.44000000  | 20.59800000 | 6.92300000  |
| C | 7.84600000  | 18.24900000 | 7.36800000  |
| C | 11.94700000 | 14.95200000 | 7.16100000  |
| C | 2.78500000  | 13.81700000 | 7.82500000  |
| C | 9.71100000  | 3.61300000  | 6.83400000  |
| C | 15.28800000 | 7.10400000  | 9.03600000  |
| C | 12.64300000 | 6.73500000  | 4.27800000  |
| C | 5.37400000  | 8.05000000  | 4.04100000  |
| C | 13.41600000 | 9.00600000  | 4.06100000  |
| C | 13.86700000 | 12.98800000 | 6.68700000  |
| C | 6.13100000  | 13.01500000 | 3.34000000  |
| C | 3.58500000  | 12.24500000 | 9.47700000  |
| C | 13.25800000 | 7.72900000  | 3.51600000  |
| C | 9.96000000  | 2.71500000  | 5.79200000  |
| C | 2.54100000  | 13.00400000 | 8.93400000  |
| C | 15.68600000 | 8.09700000  | 9.93400000  |
| C | 13.76000000 | 14.07400000 | 5.81500000  |
| C | 6.46400000  | 15.31200000 | 3.98500000  |
| C | 12.79800000 | 15.05500000 | 6.05700000  |
| C | 7.81400000  | 19.33000000 | 6.47900000  |
| C | 6.24300000  | 14.36100000 | 2.98700000  |
| C | 6.37400000  | 7.16500000  | 4.44200000  |

|   |             |             |             |
|---|-------------|-------------|-------------|
| C | 10.77200000 | 1.59900000  | 6.00400000  |
| C | 11.33200000 | 1.38800000  | 7.26700000  |
| C | 9.61600000  | 10.00200000 | 4.99400000  |
| C | 9.73100000  | 11.25500000 | 4.31900000  |
| C | 9.62700000  | 12.37000000 | 5.20800000  |
| C | 9.91500000  | 11.37800000 | 2.93400000  |
| C | 10.04000000 | 12.70200000 | 2.42400000  |
| C | 9.96600000  | 13.78700000 | 3.28300000  |
| C | 9.75100000  | 13.64200000 | 4.68000000  |
| C | 9.94600000  | 10.16600000 | 2.18600000  |
| C | 9.80500000  | 8.94900000  | 2.83200000  |
| C | 9.64300000  | 8.84500000  | 4.23800000  |
| C | 10.41400000 | 8.26200000  | 12.55000000 |
| C | 10.36400000 | 7.20900000  | 13.47600000 |
| C | 9.18700000  | 6.90300000  | 14.15800000 |
| C | 8.04900000  | 7.67300000  | 13.93400000 |
| C | 8.06100000  | 8.74700000  | 13.02500000 |
| C | 9.23700000  | 9.00100000  | 12.28800000 |
| C | 6.82700000  | 9.59500000  | 12.89800000 |
| C | 11.72300000 | 8.58400000  | 11.88100000 |
| C | 10.91100000 | 11.73000000 | 14.31400000 |
| C | 10.70400000 | 12.12600000 | 15.63200000 |
| C | 9.45000000  | 12.59000000 | 16.04700000 |
| C | 8.41100000  | 12.65300000 | 15.10900000 |
| C | 8.61500000  | 12.27800000 | 13.78300000 |
| C | 9.87500000  | 11.80400000 | 13.34900000 |
| H | 7.60800000  | 5.78600000  | 9.02100000  |
| H | 8.39500000  | 17.59100000 | 10.44800000 |
| H | 6.92600000  | 9.30800000  | 8.40200000  |
| H | 11.86300000 | 6.11200000  | 8.62800000  |
| H | 11.13300000 | 12.69900000 | 9.59300000  |

|   |             |             |             |
|---|-------------|-------------|-------------|
| H | 10.01900000 | 16.09900000 | 9.95400000  |
| H | 5.69600000  | 9.24700000  | 10.34400000 |
| H | 7.71500000  | 2.83600000  | 8.60300000  |
| H | 4.93400000  | 17.59000000 | 9.01900000  |
| H | 5.07100000  | 9.83500000  | 6.92900000  |
| H | 6.11200000  | 15.44200000 | 8.31600000  |
| H | 6.81900000  | 12.03200000 | 7.11400000  |
| H | 13.53500000 | 15.25800000 | 9.40300000  |
| H | 5.92700000  | 2.01000000  | 10.11000000 |
| H | 10.87500000 | 4.33200000  | 9.91300000  |
| H | 5.58100000  | 5.82200000  | 7.73100000  |
| H | 11.70500000 | 6.22000000  | 6.14600000  |
| H | 6.15800000  | 11.56900000 | 4.93600000  |
| H | 14.48800000 | 16.45400000 | 11.34000000 |
| H | 2.91800000  | 17.17300000 | 10.40800000 |
| H | 7.44900000  | 16.67300000 | 12.39600000 |
| H | 4.13300000  | 9.71900000  | 4.64000000  |
| H | 3.76700000  | 4.84800000  | 9.08800000  |
| H | 6.85200000  | 19.85600000 | 10.19500000 |
| H | 3.82700000  | 8.31200000  | 11.65600000 |
| H | 13.08500000 | 10.25000000 | 9.50600000  |
| H | 9.72500000  | 4.61600000  | 11.97500000 |
| H | 13.10300000 | 10.28000000 | 5.76900000  |
| H | 5.66200000  | 11.68000000 | 9.31300000  |
| H | 5.43500000  | 16.25500000 | 13.78900000 |
| H | 13.86000000 | 6.49300000  | 7.55100000  |
| H | 3.16000000  | 16.48100000 | 12.79600000 |
| H | 11.82800000 | 9.68600000  | 7.64300000  |
| H | 10.24900000 | 13.92300000 | 11.84400000 |
| H | 15.19200000 | 10.02400000 | 10.77900000 |
| H | 6.05600000  | 2.43800000  | 12.56300000 |

|   |             |             |             |
|---|-------------|-------------|-------------|
| H | 6.81600000  | 21.76800000 | 8.63200000  |
| H | 13.36800000 | 16.34800000 | 13.56600000 |
| H | 2.85400000  | 6.09100000  | 11.05100000 |
| H | 6.75500000  | 15.68100000 | 6.08100000  |
| H | 11.51200000 | 2.10700000  | 9.29200000  |
| H | 13.11100000 | 12.04300000 | 8.47000000  |
| H | 4.23500000  | 14.50400000 | 6.38500000  |
| H | 11.24300000 | 15.04100000 | 13.80800000 |
| H | 7.69000000  | 6.53800000  | 6.03300000  |
| H | 7.97000000  | 3.75200000  | 13.48400000 |
| H | 7.43000000  | 21.44500000 | 6.23400000  |
| H | 8.16200000  | 17.26900000 | 7.00600000  |
| H | 11.20600000 | 15.73400000 | 7.34700000  |
| H | 1.97500000  | 14.40300000 | 7.38500000  |
| H | 9.07900000  | 4.48500000  | 6.65400000  |
| H | 15.90500000 | 6.21400000  | 8.89500000  |
| H | 12.49900000 | 5.73500000  | 3.86100000  |
| H | 4.94800000  | 7.98500000  | 3.03700000  |
| H | 13.87500000 | 9.80200000  | 3.46900000  |
| H | 14.62400000 | 12.21900000 | 6.51900000  |
| H | 5.96300000  | 12.25800000 | 2.57100000  |
| H | 3.42300000  | 11.62900000 | 10.36400000 |
| H | 13.60200000 | 7.51600000  | 2.50300000  |
| H | 9.51800000  | 2.89000000  | 4.80800000  |
| H | 1.54300000  | 12.95200000 | 9.37200000  |
| H | 16.61200000 | 7.98800000  | 10.50100000 |
| H | 14.41900000 | 14.15100000 | 4.94900000  |
| H | 6.54900000  | 16.37000000 | 3.72600000  |
| H | 12.70700000 | 15.91000000 | 5.38400000  |
| H | 8.09300000  | 19.17800000 | 5.43400000  |
| H | 6.16700000  | 14.66600000 | 1.94200000  |

|                                                 |             |             |             |
|-------------------------------------------------|-------------|-------------|-------------|
| H                                               | 6.74100000  | 6.40600000  | 3.74600000  |
| H                                               | 10.97100000 | 0.89900000  | 5.18900000  |
| H                                               | 11.97000000 | 0.52100000  | 7.44400000  |
| H                                               | 10.07900000 | 10.20100000 | 1.10200000  |
| H                                               | 9.82700000  | 8.02800000  | 2.24500000  |
| H                                               | 9.55500000  | 7.86200000  | 4.69500000  |
| H                                               | 10.18900000 | 12.85900000 | 1.35200000  |
| H                                               | 10.05900000 | 14.79500000 | 2.87600000  |
| H                                               | 9.68100000  | 14.53100000 | 5.30600000  |
| H                                               | 11.27400000 | 6.63000000  | 13.66600000 |
| H                                               | 7.12400000  | 7.46100000  | 14.47900000 |
| H                                               | 6.87600000  | 10.25700000 | 12.02200000 |
| H                                               | 6.69600000  | 10.24800000 | 13.77300000 |
| H                                               | 5.92300000  | 8.97500000  | 12.82200000 |
| H                                               | 12.37600000 | 7.70400000  | 11.81000000 |
| H                                               | 12.28100000 | 9.35400000  | 12.44300000 |
| H                                               | 11.56100000 | 8.97800000  | 10.87000000 |
| H                                               | 9.16700000  | 6.07500000  | 14.87100000 |
| H                                               | 7.78000000  | 12.33900000 | 13.08400000 |
| H                                               | 11.89400000 | 11.36100000 | 14.01300000 |
| H                                               | 11.53000000 | 12.05200000 | 16.34400000 |
| H                                               | 7.41500000  | 12.99600000 | 15.40300000 |
| H                                               | 9.28300000  | 12.88000000 | 17.08700000 |
| H                                               | 11.11300000 | 11.25100000 | 11.93500000 |
| Cl                                              | 7.76600000  | 12.07500000 | 10.69300000 |
| Na                                              | 7.77500000  | 14.10600000 | 9.90100000  |
| IM5-BIAN-IPr <sup>#</sup> (IM5-L <sub>B</sub> ) |             |             |             |
| Pd                                              | 9.05500000  | 10.18800000 | 10.65800000 |
| N                                               | 9.21800000  | 12.02900000 | 7.85900000  |
| N                                               | 9.31100000  | 9.84600000  | 7.63600000  |
| N                                               | 9.74000000  | 11.69500000 | 11.86600000 |

|   |             |             |             |
|---|-------------|-------------|-------------|
| C | 8.45300000  | 6.38200000  | 8.77400000  |
| C | 9.13600000  | 10.84700000 | 8.59100000  |
| C | 8.27500000  | 7.69400000  | 8.31200000  |
| C | 9.71600000  | 5.80400000  | 8.90500000  |
| C | 11.93400000 | 14.45000000 | 10.37200000 |
| C | 9.45100000  | 11.75700000 | 6.51700000  |
| C | 8.09100000  | 15.90900000 | 9.22300000  |
| C | 9.48200000  | 10.38300000 | 6.36900000  |
| C | 7.66900000  | 17.25900000 | 9.79700000  |
| C | 9.81800000  | 14.18500000 | 8.95600000  |
| C | 6.86300000  | 8.24000000  | 8.06100000  |
| C | 6.45400000  | 8.21700000  | 6.58300000  |
| C | 10.83500000 | 6.56500000  | 8.55500000  |
| C | 11.26600000 | 13.74100000 | 9.18000000  |
| C | 9.40700000  | 15.46200000 | 9.36300000  |
| C | 5.73000000  | 7.56500000  | 8.84400000  |
| C | 5.06200000  | 8.27600000  | 9.84700000  |
| C | 10.23000000 | 3.43600000  | 8.15800000  |
| C | 7.77000000  | 3.01000000  | 9.73500000  |
| C | 5.12300000  | 17.31800000 | 10.16000000 |
| C | 8.80700000  | 3.81200000  | 10.23200000 |
| C | 5.46400000  | 9.11400000  | 6.15400000  |
| C | 7.17600000  | 15.06400000 | 8.59500000  |
| C | 6.52200000  | 13.01700000 | 7.28500000  |
| C | 13.19900000 | 15.04800000 | 10.28300000 |
| C | 6.42000000  | 13.50400000 | 5.83400000  |
| C | 7.57200000  | 18.39600000 | 8.77700000  |
| C | 6.41500000  | 17.09000000 | 10.65500000 |
| C | 5.16000000  | 12.96400000 | 7.98900000  |
| C | 8.86400000  | 13.35400000 | 8.33000000  |
| C | 10.73200000 | 7.87700000  | 8.08800000  |

|   |             |             |             |
|---|-------------|-------------|-------------|
| C | 6.76800000  | 2.53200000  | 10.58400000 |
| C | 9.92400000  | 4.35500000  | 9.34200000  |
| C | 7.54700000  | 13.81100000 | 8.09300000  |
| C | 5.25500000  | 6.28300000  | 8.51900000  |
| C | 12.33900000 | 8.28100000  | 6.14200000  |
| C | 12.14600000 | 7.01500000  | 5.57500000  |
| C | 6.29800000  | 12.55800000 | 4.80600000  |
| C | 13.77400000 | 15.68000000 | 11.39300000 |
| C | 4.00100000  | 17.06900000 | 10.95400000 |
| C | 12.10900000 | 13.85900000 | 7.91400000  |
| C | 6.55300000  | 16.61600000 | 11.96900000 |
| C | 4.95400000  | 9.05400000  | 4.85700000  |
| C | 4.17800000  | 5.72000000  | 9.20400000  |
| C | 7.23800000  | 19.68400000 | 9.23100000  |
| C | 13.25000000 | 8.37500000  | 8.45400000  |
| C | 3.97400000  | 7.72200000  | 10.52800000 |
| C | 13.64900000 | 9.34900000  | 9.37800000  |
| C | 8.81500000  | 4.12500000  | 11.60000000 |
| C | 12.96400000 | 9.26900000  | 5.36500000  |
| C | 5.08900000  | 12.40200000 | 9.27500000  |
| C | 5.43500000  | 16.37300000 | 12.76600000 |
| C | 14.07600000 | 7.25000000  | 8.28900000  |
| C | 4.15200000  | 16.59600000 | 12.25900000 |
| C | 11.99300000 | 8.60300000  | 7.60300000  |
| C | 11.27000000 | 14.48800000 | 11.60900000 |
| C | 14.82300000 | 9.20900000  | 10.12300000 |
| C | 6.79300000  | 2.84000000  | 11.94600000 |
| C | 7.19800000  | 20.76800000 | 8.35700000  |
| C | 13.09800000 | 15.71900000 | 12.61200000 |
| C | 9.43600000  | 8.45400000  | 8.01400000  |
| C | 3.53200000  | 6.43700000  | 10.21500000 |

|   |             |             |             |
|---|-------------|-------------|-------------|
| C | 6.39400000  | 14.86200000 | 5.48500000  |
| C | 11.05100000 | 2.31500000  | 8.35800000  |
| C | 13.04800000 | 12.86600000 | 7.60700000  |
| C | 3.98000000  | 13.43000000 | 7.39700000  |
| C | 11.84400000 | 15.11100000 | 12.71600000 |
| C | 6.92400000  | 7.26000000  | 5.67600000  |
| C | 7.82000000  | 3.64200000  | 12.45000000 |
| C | 7.48700000  | 20.58900000 | 7.00000000  |
| C | 7.86000000  | 18.23000000 | 7.41700000  |
| C | 12.04900000 | 14.99000000 | 7.08800000  |
| C | 2.75800000  | 13.33500000 | 8.07000000  |
| C | 9.69100000  | 3.64500000  | 6.88200000  |
| C | 15.24200000 | 7.09700000  | 9.04000000  |
| C | 12.58400000 | 6.73700000  | 4.27700000  |
| C | 5.42700000  | 8.09100000  | 3.96100000  |
| C | 13.39700000 | 8.99600000  | 4.06800000  |
| C | 13.90500000 | 12.99300000 | 6.51200000  |
| C | 6.15400000  | 12.95100000 | 3.47400000  |
| C | 3.87000000  | 12.30500000 | 9.94400000  |
| C | 13.21500000 | 7.72400000  | 3.51900000  |
| C | 9.95700000  | 2.75600000  | 5.83600000  |
| C | 2.69600000  | 12.76900000 | 9.34200000  |
| C | 15.62200000 | 8.07700000  | 9.96000000  |
| C | 13.83300000 | 14.12400000 | 5.69600000  |
| C | 6.25000000  | 15.26000000 | 4.15300000  |
| C | 12.90000000 | 15.12100000 | 5.98800000  |
| C | 7.81500000  | 19.31600000 | 6.53400000  |
| C | 6.12700000  | 14.30700000 | 3.14100000  |
| C | 6.41400000  | 7.19700000  | 4.37500000  |
| C | 10.77200000 | 1.64300000  | 6.04900000  |
| C | 11.32000000 | 1.42600000  | 7.31700000  |

|   |             |             |             |
|---|-------------|-------------|-------------|
| C | 9.63100000  | 10.04200000 | 4.95800000  |
| C | 9.75200000  | 11.31100000 | 4.31200000  |
| C | 9.65300000  | 12.40400000 | 5.22600000  |
| C | 9.92300000  | 11.46600000 | 2.92900000  |
| C | 10.03200000 | 12.80400000 | 2.44900000  |
| C | 9.95200000  | 13.86800000 | 3.33300000  |
| C | 9.75300000  | 13.69000000 | 4.73000000  |
| C | 9.94800000  | 10.27100000 | 2.15300000  |
| C | 9.80500000  | 9.03900000  | 2.77100000  |
| C | 9.64800000  | 8.90200000  | 4.17600000  |
| C | 10.39000000 | 8.46400000  | 12.68400000 |
| C | 10.43100000 | 7.48200000  | 13.68200000 |
| C | 9.27000000  | 7.08000000  | 14.33900000 |
| C | 8.05700000  | 7.67600000  | 14.00400000 |
| C | 7.98100000  | 8.66700000  | 13.01100000 |
| C | 9.15000000  | 9.03300000  | 12.30900000 |
| C | 6.64200000  | 9.31700000  | 12.77100000 |
| C | 11.69200000 | 8.91200000  | 12.07200000 |
| C | 10.13800000 | 12.17600000 | 14.23500000 |
| C | 9.68400000  | 12.66300000 | 15.45900000 |
| C | 8.33300000  | 12.97800000 | 15.64200000 |
| C | 7.45500000  | 12.83500000 | 14.56100000 |
| C | 7.90900000  | 12.39000000 | 13.32400000 |
| C | 9.26300000  | 12.03100000 | 13.12700000 |
| H | 7.57700000  | 5.80100000  | 9.05400000  |
| H | 8.47600000  | 17.55500000 | 10.49100000 |
| H | 6.86300000  | 9.29600000  | 8.37500000  |
| H | 11.82600000 | 6.12100000  | 8.66000000  |
| H | 11.21900000 | 12.66800000 | 9.44100000  |
| H | 10.13600000 | 16.11100000 | 9.85200000  |
| H | 5.39100000  | 9.28800000  | 10.09100000 |

|   |             |             |             |
|---|-------------|-------------|-------------|
| H | 7.75200000  | 2.74500000  | 8.67600000  |
| H | 4.99200000  | 17.70100000 | 9.14500000  |
| H | 5.06700000  | 9.85100000  | 6.85800000  |
| H | 6.13200000  | 15.36800000 | 8.50900000  |
| H | 6.87200000  | 11.97400000 | 7.23000000  |
| H | 13.74700000 | 15.02700000 | 9.34000000  |
| H | 5.96600000  | 1.90900000  | 10.18000000 |
| H | 10.83400000 | 4.35800000  | 9.96800000  |
| H | 5.71300000  | 5.72300000  | 7.70000000  |
| H | 11.64300000 | 6.23100000  | 6.14700000  |
| H | 6.32600000  | 11.49500000 | 5.05100000  |
| H | 14.75700000 | 16.14600000 | 11.29600000 |
| H | 3.00300000  | 17.24500000 | 10.54800000 |
| H | 7.55400000  | 16.42400000 | 12.36700000 |
| H | 4.18300000  | 9.76200000  | 4.54800000  |
| H | 3.83200000  | 4.71900000  | 8.93700000  |
| H | 7.00800000  | 19.83600000 | 10.28800000 |
| H | 3.46800000  | 8.30500000  | 11.30100000 |
| H | 13.02600000 | 10.23400000 | 9.52200000  |
| H | 9.60600000  | 4.76200000  | 12.00500000 |
| H | 13.10600000 | 10.27000000 | 5.78100000  |
| H | 6.00600000  | 12.04900000 | 9.75600000  |
| H | 5.56900000  | 16.00400000 | 13.78500000 |
| H | 13.82600000 | 6.49800000  | 7.53800000  |
| H | 3.27500000  | 16.40300000 | 12.87900000 |
| H | 11.79000000 | 9.68400000  | 7.64700000  |
| H | 10.29200000 | 14.01300000 | 11.69900000 |
| H | 15.10900000 | 9.98800000  | 10.83200000 |
| H | 6.01800000  | 2.45400000  | 12.61100000 |
| H | 6.95000000  | 21.76100000 | 8.73900000  |
| H | 13.54100000 | 16.21800000 | 13.47600000 |

|   |             |             |             |
|---|-------------|-------------|-------------|
| H | 2.68300000  | 6.00000000  | 10.74500000 |
| H | 6.49100000  | 15.62700000 | 6.25600000  |
| H | 11.47800000 | 2.13400000  | 9.34800000  |
| H | 13.12300000 | 11.98400000 | 8.24700000  |
| H | 4.01200000  | 13.86900000 | 6.39800000  |
| H | 11.30400000 | 15.11400000 | 13.66500000 |
| H | 7.69300000  | 6.55000000  | 5.98900000  |
| H | 7.85000000  | 3.89600000  | 13.51100000 |
| H | 7.46500000  | 21.44000000 | 6.31600000  |
| H | 8.13500000  | 17.24300000 | 7.04000000  |
| H | 11.33000000 | 15.78200000 | 7.31200000  |
| H | 1.85000000  | 13.70400000 | 7.58700000  |
| H | 9.05700000  | 4.51500000  | 6.70100000  |
| H | 15.86700000 | 6.21400000  | 8.89000000  |
| H | 12.42800000 | 5.74000000  | 3.86000000  |
| H | 5.02600000  | 8.04000000  | 2.94700000  |
| H | 13.87300000 | 9.78400000  | 3.48100000  |
| H | 14.63800000 | 12.21000000 | 6.30400000  |
| H | 6.07400000  | 12.19100000 | 2.69500000  |
| H | 3.83600000  | 11.86500000 | 10.94300000 |
| H | 13.55500000 | 7.50800000  | 2.50500000  |
| H | 9.52500000  | 2.93700000  | 4.84900000  |
| H | 1.74100000  | 12.68900000 | 9.86400000  |
| H | 16.54200000 | 7.96200000  | 10.53700000 |
| H | 14.49900000 | 14.22600000 | 4.83700000  |
| H | 6.23500000  | 16.32500000 | 3.90900000  |
| H | 12.83400000 | 16.01000000 | 5.35600000  |
| H | 8.04500000  | 19.16300000 | 5.47700000  |
| H | 6.01900000  | 14.61700000 | 2.10000000  |
| H | 6.79300000  | 6.44300000  | 3.68100000  |
| H | 10.98200000 | 0.94800000  | 5.23300000  |

|   |             |             |             |
|---|-------------|-------------|-------------|
| H | 11.96100000 | 0.55900000  | 7.49600000  |
| H | 10.07600000 | 10.32900000 | 1.07000000  |
| H | 9.82200000  | 8.13200000  | 2.16300000  |
| H | 9.55300000  | 7.90800000  | 4.61100000  |
| H | 10.17100000 | 12.98600000 | 1.38100000  |
| H | 10.02800000 | 14.88700000 | 2.94800000  |
| H | 9.67700000  | 14.56200000 | 5.38000000  |
| H | 11.39500000 | 7.04200000  | 13.94800000 |
| H | 7.13800000  | 7.38600000  | 14.52200000 |
| H | 6.66700000  | 9.95600000  | 11.87600000 |
| H | 6.36800000  | 9.95200000  | 13.62900000 |
| H | 5.85200000  | 8.56100000  | 12.64500000 |
| H | 12.41300000 | 8.08400000  | 11.98400000 |
| H | 12.17500000 | 9.68900000  | 12.69400000 |
| H | 11.53600000 | 9.33500000  | 11.07100000 |
| H | 9.31400000  | 6.32700000  | 15.12800000 |
| H | 7.22200000  | 12.30700000 | 12.48100000 |
| H | 11.19200000 | 11.90200000 | 14.11700000 |
| H | 10.38700000 | 12.78200000 | 16.28800000 |
| H | 6.39700000  | 13.07700000 | 14.68600000 |
| H | 7.97100000  | 13.32200000 | 16.61200000 |
| H | 10.73600000 | 11.46300000 | 11.96000000 |

TS5-BIAN-IPr# (TS5-LB)

|    |            |             |             |
|----|------------|-------------|-------------|
| Pd | 9.06100000 | 10.61200000 | 10.52100000 |
| N  | 9.20700000 | 12.07400000 | 7.74200000  |
| N  | 9.31500000 | 9.87900000  | 7.59700000  |
| N  | 9.53600000 | 11.17800000 | 12.32600000 |
| C  | 8.46200000 | 6.42400000  | 8.76000000  |
| C  | 9.14600000 | 10.91600000 | 8.52300000  |
| C  | 8.29200000 | 7.74200000  | 8.31500000  |
| C  | 9.72200000 | 5.83200000  | 8.86100000  |

|   |             |             |             |
|---|-------------|-------------|-------------|
| C | 11.87000000 | 14.39500000 | 10.35300000 |
| C | 9.42500000  | 11.75700000 | 6.40900000  |
| C | 8.08600000  | 15.93800000 | 9.15300000  |
| C | 9.46400000  | 10.38000000 | 6.31300000  |
| C | 7.67100000  | 17.28200000 | 9.74900000  |
| C | 9.80300000  | 14.20700000 | 8.87500000  |
| C | 6.88400000  | 8.31700000  | 8.13800000  |
| C | 6.39500000  | 8.29000000  | 6.68900000  |
| C | 10.83800000 | 6.59000000  | 8.49700000  |
| C | 11.23300000 | 13.72800000 | 9.12700000  |
| C | 9.39500000  | 15.47300000 | 9.31200000  |
| C | 5.81700000  | 7.66900000  | 9.02000000  |
| C | 5.42900000  | 8.29100000  | 10.18100000 |
| C | 10.22500000 | 3.45800000  | 8.11200000  |
| C | 7.73300000  | 3.12700000  | 9.69500000  |
| C | 5.12300000  | 17.28600000 | 10.06000000 |
| C | 8.83200000  | 3.83400000  | 10.19600000 |
| C | 5.38800000  | 9.19000000  | 6.30600000  |
| C | 7.18000000  | 15.12000000 | 8.48000000  |
| C | 6.51900000  | 13.08500000 | 7.15000000  |
| C | 13.05800000 | 15.12400000 | 10.29900000 |
| C | 6.41200000  | 13.56700000 | 5.70000000  |
| C | 7.58800000  | 18.43600000 | 8.74700000  |
| C | 6.40800000  | 17.13300000 | 10.59700000 |
| C | 5.16100000  | 13.03100000 | 7.86100000  |
| C | 8.85600000  | 13.39900000 | 8.20700000  |
| C | 10.73700000 | 7.90600000  | 8.03800000  |
| C | 6.74200000  | 2.64100000  | 10.55200000 |
| C | 9.93500000  | 4.38300000  | 9.29500000  |
| C | 7.54700000  | 13.87300000 | 7.96100000  |
| C | 5.16100000  | 6.49100000  | 8.66900000  |

|   |             |             |             |
|---|-------------|-------------|-------------|
| C | 12.37800000 | 8.29800000  | 6.11100000  |
| C | 12.21300000 | 7.02500000  | 5.54900000  |
| C | 6.25000000  | 12.61800000 | 4.68100000  |
| C | 13.59200000 | 15.71700000 | 11.44800000 |
| C | 3.98800000  | 17.08100000 | 10.84700000 |
| C | 12.12200000 | 13.83100000 | 7.89400000  |
| C | 6.52400000  | 16.79000000 | 11.94700000 |
| C | 4.82500000  | 9.13600000  | 5.03200000  |
| C | 4.16500000  | 5.94200000  | 9.47000000  |
| C | 7.23500000  | 19.71300000 | 9.21600000  |
| C | 13.22600000 | 8.41600000  | 8.45800000  |
| C | 4.42100000  | 7.75400000  | 10.97700000 |
| C | 13.52200000 | 9.35300000  | 9.45100000  |
| C | 8.91300000  | 4.03900000  | 11.57700000 |
| C | 12.99600000 | 9.29100000  | 5.33600000  |
| C | 5.08900000  | 12.42300000 | 9.12500000  |
| C | 5.39200000  | 16.59900000 | 12.73900000 |
| C | 14.11000000 | 7.34100000  | 8.28600000  |
| C | 4.11700000  | 16.73600000 | 12.18900000 |
| C | 12.00000000 | 8.63000000  | 7.56000000  |
| C | 11.23600000 | 14.26800000 | 11.59200000 |
| C | 14.66000000 | 9.22700000  | 10.24900000 |
| C | 6.83900000  | 2.84200000  | 11.92600000 |
| C | 7.19500000  | 20.81000000 | 8.35800000  |
| C | 12.94800000 | 15.58900000 | 12.67000000 |
| C | 9.44600000  | 8.49400000  | 7.98800000  |
| C | 3.78800000  | 6.57400000  | 10.62800000 |
| C | 6.42600000  | 14.92200000 | 5.34000000  |
| C | 11.03600000 | 2.33000000  | 8.31100000  |
| C | 13.10800000 | 12.86200000 | 7.67700000  |
| C | 3.98600000  | 13.53900000 | 7.29600000  |

|   |             |             |             |
|---|-------------|-------------|-------------|
| C | 11.76400000 | 14.85600000 | 12.73800000 |
| C | 6.82300000  | 7.33700000  | 5.75700000  |
| C | 7.92900000  | 3.54500000  | 12.43600000 |
| C | 7.50300000  | 20.65400000 | 7.00400000  |
| C | 7.89900000  | 18.29400000 | 7.38900000  |
| C | 12.04900000 | 14.91000000 | 7.00500000  |
| C | 2.76800000  | 13.44400000 | 7.97700000  |
| C | 9.68400000  | 3.67000000  | 6.83700000  |
| C | 15.23900000 | 7.20000000  | 9.09400000  |
| C | 12.67100000 | 6.74900000  | 4.25600000  |
| C | 5.25700000  | 8.17700000  | 4.11200000  |
| C | 13.44800000 | 9.02000000  | 4.04400000  |
| C | 13.99600000 | 12.96200000 | 6.60500000  |
| C | 6.10400000  | 13.00500000 | 3.34700000  |
| C | 3.87400000  | 12.32500000 | 9.80200000  |
| C | 13.29300000 | 7.74300000  | 3.50000000  |
| C | 9.93700000  | 2.77600000  | 5.79200000  |
| C | 2.70500000  | 12.83500000 | 9.22900000  |
| C | 15.52300000 | 8.14500000  | 10.07700000 |
| C | 13.91000000 | 14.04000000 | 5.72300000  |
| C | 6.27900000  | 15.31500000 | 4.00700000  |
| C | 12.93300000 | 15.01300000 | 5.92900000  |
| C | 7.85400000  | 19.39300000 | 6.52300000  |
| C | 6.11600000  | 14.35800000 | 3.00300000  |
| C | 6.25900000  | 7.28000000  | 4.48000000  |
| C | 10.74200000 | 1.65600000  | 6.00500000  |
| C | 11.29400000 | 1.43700000  | 7.27100000  |
| C | 9.61000000  | 9.98700000  | 4.91500000  |
| C | 9.72400000  | 11.23000000 | 4.22000000  |
| C | 9.62600000  | 12.35600000 | 5.09500000  |
| C | 9.89700000  | 11.33500000 | 2.83500000  |

|   |             |             |             |
|---|-------------|-------------|-------------|
| C | 10.01300000 | 12.65300000 | 2.30600000  |
| C | 9.93900000  | 13.74800000 | 3.15100000  |
| C | 9.73800000  | 13.62100000 | 4.55200000  |
| C | 9.92500000  | 10.11300000 | 2.10300000  |
| C | 9.78600000  | 8.90500000  | 2.76600000  |
| C | 9.63200000  | 8.82000000  | 4.17500000  |
| C | 10.51100000 | 8.82800000  | 12.59500000 |
| C | 10.53500000 | 7.65400000  | 13.30500000 |
| C | 9.36800000  | 7.13300000  | 13.84700000 |
| C | 8.16200000  | 7.79300000  | 13.67100000 |
| C | 8.09400000  | 8.96800000  | 12.96400000 |
| C | 9.27800000  | 9.47000000  | 12.40400000 |
| C | 6.77000000  | 9.66500000  | 12.84300000 |
| C | 11.79600000 | 9.39300000  | 12.07200000 |
| C | 9.72200000  | 11.99100000 | 14.62600000 |
| C | 9.28400000  | 12.77100000 | 15.65700000 |
| C | 8.19100000  | 13.48100000 | 15.49000000 |
| C | 7.54700000  | 13.41800000 | 14.27200000 |
| C | 7.98400000  | 12.65400000 | 13.23400000 |
| C | 9.07500000  | 11.92800000 | 13.39800000 |
| H | 7.58200000  | 5.85200000  | 9.05300000  |
| H | 8.47900000  | 17.55700000 | 10.45200000 |
| H | 6.93200000  | 9.37400000  | 8.44300000  |
| H | 11.83100000 | 6.14200000  | 8.58600000  |
| H | 11.14400000 | 12.65300000 | 9.37700000  |
| H | 10.11700000 | 16.09900000 | 9.83900000  |
| H | 5.92300000  | 9.21400000  | 10.45500000 |
| H | 7.65800000  | 2.94400000  | 8.62400000  |
| H | 5.00700000  | 17.58200000 | 9.01700000  |
| H | 5.02700000  | 9.92900000  | 7.02600000  |
| H | 6.14000000  | 15.43500000 | 8.37700000  |

|   |             |             |             |
|---|-------------|-------------|-------------|
| H | 6.86800000  | 12.04100000 | 7.09600000  |
| H | 13.57900000 | 15.23400000 | 9.35200000  |
| H | 5.89100000  | 2.09800000  | 10.14200000 |
| H | 10.85300000 | 4.38700000  | 9.90800000  |
| H | 5.41500000  | 6.00400000  | 7.74600000  |
| H | 11.71700000 | 6.23600000  | 6.11700000  |
| H | 6.24700000  | 11.55600000 | 4.93400000  |
| H | 14.51800000 | 16.28500000 | 11.38000000 |
| H | 2.99700000  | 17.19200000 | 10.40700000 |
| H | 7.51900000  | 16.66700000 | 12.38000000 |
| H | 4.04300000  | 9.84700000  | 4.75800000  |
| H | 3.67200000  | 5.02200000  | 9.17900000  |
| H | 6.98600000  | 19.84500000 | 10.27100000 |
| H | 4.12500000  | 8.26500000  | 11.87200000 |
| H | 12.84400000 | 10.19500000 | 9.60100000  |
| H | 9.75500000  | 4.59800000  | 11.98600000 |
| H | 13.11800000 | 10.29600000 | 5.74900000  |
| H | 6.00300000  | 12.03000000 | 9.58300000  |
| H | 5.50600000  | 16.34300000 | 13.79100000 |
| H | 13.93500000 | 6.61800000  | 7.49000000  |
| H | 3.23000000  | 16.58100000 | 12.80600000 |
| H | 11.79000000 | 9.70900000  | 7.58900000  |
| H | 10.30700000 | 13.70200000 | 11.64300000 |
| H | 14.87400000 | 9.98100000  | 11.00600000 |
| H | 6.07200000  | 2.45000000  | 12.59600000 |
| H | 6.92900000  | 21.79400000 | 8.75100000  |
| H | 13.36100000 | 16.05600000 | 13.56600000 |
| H | 3.00000000  | 6.15300000  | 11.25100000 |
| H | 6.55800000  | 15.68800000 | 6.10500000  |
| H | 11.46500000 | 2.14900000  | 9.30000000  |
| H | 13.19000000 | 12.02200000 | 8.36800000  |

|   |             |             |             |
|---|-------------|-------------|-------------|
| H | 4.01800000  | 14.00900000 | 6.31200000  |
| H | 11.24500000 | 14.74400000 | 13.68800000 |
| H | 7.60300000  | 6.62500000  | 6.03600000  |
| H | 8.01600000  | 3.71200000  | 13.50800000 |
| H | 7.47800000  | 21.51500000 | 6.33200000  |
| H | 8.18900000  | 17.31600000 | 7.00100000  |
| H | 11.29200000 | 15.68100000 | 7.15900000  |
| H | 1.86300000  | 13.84800000 | 7.51800000  |
| H | 9.05900000  | 4.54800000  | 6.65700000  |
| H | 15.91200000 | 6.35500000  | 8.93800000  |
| H | 12.53600000 | 5.74700000  | 3.84200000  |
| H | 4.81500000  | 8.13200000  | 3.11500000  |
| H | 13.91600000 | 9.81400000  | 3.45800000  |
| H | 14.75900000 | 12.19600000 | 6.46300000  |
| H | 5.99400000  | 12.24200000 | 2.57400000  |
| H | 3.83900000  | 11.84500000 | 10.78100000 |
| H | 13.64600000 | 7.52800000  | 2.49000000  |
| H | 9.50400000  | 2.95900000  | 4.80600000  |
| H | 1.75300000  | 12.75400000 | 9.75600000  |
| H | 16.41600000 | 8.04400000  | 10.69600000 |
| H | 14.59900000 | 14.11900000 | 4.88100000  |
| H | 6.29500000  | 16.37700000 | 3.75400000  |
| H | 12.85800000 | 15.86100000 | 5.24500000  |
| H | 8.10000000  | 19.25900000 | 5.46800000  |
| H | 6.00900000  | 14.66400000 | 1.96100000  |
| H | 6.60800000  | 6.52900000  | 3.76800000  |
| H | 10.94300000 | 0.95700000  | 5.19000000  |
| H | 11.92800000 | 0.56600000  | 7.45000000  |
| H | 10.05100000 | 10.13200000 | 1.01900000  |
| H | 9.80500000  | 7.97700000  | 2.19200000  |
| H | 9.54300000  | 7.84200000  | 4.64700000  |

|   |             |             |             |
|---|-------------|-------------|-------------|
| H | 10.15400000 | 12.79600000 | 1.23200000  |
| H | 10.02400000 | 14.75100000 | 2.73000000  |
| H | 9.66800000  | 14.51600000 | 5.16900000  |
| H | 11.49100000 | 7.15500000  | 13.44000000 |
| H | 7.24000000  | 7.39600000  | 14.08700000 |
| H | 6.68800000  | 10.22100000 | 11.90300000 |
| H | 6.62900000  | 10.39100000 | 13.64800000 |
| H | 5.95800000  | 8.94400000  | 12.90100000 |
| H | 12.59100000 | 8.64300000  | 12.08500000 |
| H | 12.14400000 | 10.24000000 | 12.67700000 |
| H | 11.69400000 | 9.75200000  | 11.03800000 |
| H | 9.40400000  | 6.22600000  | 14.41300000 |
| H | 7.48200000  | 12.60000000 | 12.28100000 |
| H | 10.56700000 | 11.41700000 | 14.76600000 |
| H | 9.79600000  | 12.81400000 | 16.60100000 |
| H | 6.68800000  | 13.96300000 | 14.12800000 |
| H | 7.84200000  | 14.07300000 | 16.30400000 |
| H | 10.51400000 | 11.23100000 | 12.20300000 |

N-methylaniline

|   |             |             |             |
|---|-------------|-------------|-------------|
| C | 13.30600000 | 12.33000000 | 17.39900000 |
| C | 13.32000000 | 11.12000000 | 16.70500000 |
| C | 13.30300000 | 9.90000000  | 17.38500000 |
| C | 13.28100000 | 9.91100000  | 18.78600000 |
| C | 13.26900000 | 11.10900000 | 19.49200000 |
| C | 13.27200000 | 12.34600000 | 18.80900000 |
| C | 13.30900000 | 14.83000000 | 18.87400000 |
| H | 13.25400000 | 11.09600000 | 20.58600000 |
| H | 13.31600000 | 13.26900000 | 16.84700000 |
| H | 13.33800000 | 11.14000000 | 15.61300000 |
| H | 13.26900000 | 8.96500000  | 19.33500000 |
| H | 13.30200000 | 8.95700000  | 16.83400000 |

|   |             |             |             |
|---|-------------|-------------|-------------|
| H | 13.28700000 | 13.49100000 | 20.51400000 |
| H | 13.46600000 | 15.60000000 | 19.63800000 |
| H | 14.15100000 | 14.88600000 | 18.16200000 |
| H | 12.38300000 | 15.07400000 | 18.32000000 |
| N | 13.23400000 | 13.53600000 | 19.50600000 |

IM3

|    |             |             |             |
|----|-------------|-------------|-------------|
| Pd | 8.83200000  | 10.17200000 | 10.26600000 |
| N  | 9.13800000  | 11.98400000 | 7.51800000  |
| N  | 9.31000000  | 9.81100000  | 7.26600000  |
| N  | 9.97000000  | 11.51500000 | 11.10100000 |
| C  | 8.44500000  | 6.36800000  | 8.44800000  |
| C  | 9.07500000  | 10.79100000 | 8.22400000  |
| C  | 8.28000000  | 7.67300000  | 7.96400000  |
| C  | 9.70400000  | 5.79100000  | 8.60600000  |
| C  | 11.91600000 | 14.30000000 | 10.00600000 |
| C  | 9.41000000  | 11.74200000 | 6.17900000  |
| C  | 8.01300000  | 15.78900000 | 9.06200000  |
| C  | 9.49800000  | 10.37100000 | 6.01200000  |
| C  | 7.61800000  | 17.13600000 | 9.65900000  |
| C  | 9.75000000  | 14.10700000 | 8.65600000  |
| C  | 6.86900000  | 8.21700000  | 7.72000000  |
| C  | 6.42800000  | 8.11700000  | 6.26000000  |
| C  | 10.82700000 | 6.53900000  | 8.23800000  |
| C  | 11.22000000 | 13.68900000 | 8.77700000  |
| C  | 9.33800000  | 15.35300000 | 9.14300000  |
| C  | 5.81500000  | 7.58700000  | 8.63200000  |
| C  | 5.57500000  | 8.15200000  | 9.88900000  |
| C  | 10.25200000 | 3.39600000  | 7.99300000  |
| C  | 7.79200000  | 2.95600000  | 9.54400000  |
| C  | 5.06900000  | 17.33000000 | 9.90700000  |

|   |             |             |             |
|---|-------------|-------------|-------------|
| C | 8.74900000  | 3.87300000  | 9.99700000  |
| C | 5.36100000  | 8.92500000  | 5.83100000  |
| C | 7.08600000  | 14.96100000 | 8.43100000  |
| C | 6.40400000  | 12.93400000 | 7.09000000  |
| C | 13.10900000 | 15.03000000 | 9.91500000  |
| C | 6.31900000  | 13.38900000 | 5.62800000  |
| C | 7.61100000  | 18.28900000 | 8.65300000  |
| C | 6.32100000  | 17.03300000 | 10.46300000 |
| C | 5.03900000  | 12.92100000 | 7.79000000  |
| C | 8.78100000  | 13.29000000 | 8.03500000  |
| C | 10.73500000 | 7.84200000  | 7.74100000  |
| C | 6.75200000  | 2.53800000  | 10.38000000 |
| C | 9.90000000  | 4.36600000  | 9.11900000  |
| C | 7.44800000  | 13.72800000 | 7.87700000  |
| C | 5.07200000  | 6.45900000  | 8.25300000  |
| C | 12.44400000 | 8.14700000  | 5.86000000  |
| C | 12.24800000 | 6.86400000  | 5.33300000  |
| C | 6.21700000  | 12.42500000 | 4.61500000  |
| C | 13.70900000 | 15.56800000 | 11.05900000 |
| C | 3.90000000  | 17.18000000 | 10.66000000 |
| C | 11.99100000 | 13.96200000 | 7.48800000  |
| C | 6.37400000  | 16.58900000 | 11.79200000 |
| C | 4.85600000  | 8.81500000  | 4.53600000  |
| C | 4.12400000  | 5.90700000  | 9.11800000  |
| C | 7.40400000  | 19.59700000 | 9.12700000  |
| C | 13.19200000 | 8.45700000  | 8.22900000  |
| C | 4.62500000  | 7.60800000  | 10.75400000 |
| C | 13.45900000 | 9.50100000  | 9.12400000  |
| C | 8.64000000  | 4.36100000  | 11.30900000 |
| C | 13.15200000 | 9.08100000  | 5.08900000  |
| C | 4.93200000  | 12.33400000 | 9.06300000  |

|   |             |             |             |
|---|-------------|-------------|-------------|
| C | 5.21100000  | 16.44500000 | 12.54800000 |
| C | 14.07300000 | 7.36400000  | 8.20700000  |
| C | 3.96700000  | 16.73900000 | 11.98300000 |
| C | 12.00000000 | 8.56500000  | 7.26900000  |
| C | 11.35200000 | 14.10500000 | 11.27800000 |
| C | 14.55900000 | 9.45500000  | 9.98400000  |
| C | 6.65600000  | 3.02700000  | 11.68400000 |
| C | 7.41400000  | 20.68700000 | 8.25900000  |
| C | 13.12900000 | 15.38300000 | 12.31400000 |
| C | 9.44200000  | 8.42200000  | 7.65100000  |
| C | 3.89700000  | 6.47900000  | 10.37100000 |
| C | 6.30000000  | 14.74200000 | 5.25500000  |
| C | 11.10000000 | 2.31200000  | 8.26100000  |
| C | 12.87100000 | 12.99900000 | 6.97900000  |
| C | 3.88700000  | 13.46100000 | 7.20500000  |
| C | 11.94800000 | 14.64300000 | 12.41800000 |
| C | 6.97300000  | 7.19900000  | 5.35500000  |
| C | 7.60500000  | 3.94400000  | 12.14500000 |
| C | 7.62900000  | 20.49500000 | 6.89100000  |
| C | 7.83100000  | 18.11100000 | 7.28200000  |
| C | 11.90200000 | 15.19500000 | 6.82600000  |
| C | 2.65800000  | 13.41700000 | 7.87100000  |
| C | 9.73100000  | 3.53000000  | 6.69900000  |
| C | 15.16500000 | 7.30600000  | 9.07500000  |
| C | 12.75500000 | 6.52300000  | 4.07300000  |
| C | 5.40700000  | 7.89200000  | 3.64100000  |
| C | 13.65500000 | 8.74600000  | 3.83300000  |
| C | 13.64000000 | 13.25300000 | 5.84000000  |
| C | 6.09900000  | 12.79400000 | 3.27400000  |
| C | 3.70500000  | 12.28400000 | 9.72400000  |
| C | 13.46100000 | 7.46100000  | 3.31900000  |

|   |             |             |             |
|---|-------------|-------------|-------------|
| C | 10.04500000 | 2.60300000  | 5.70100000  |
| C | 2.56100000  | 12.82600000 | 9.13000000  |
| C | 15.41400000 | 8.35200000  | 9.96700000  |
| C | 13.54100000 | 14.48400000 | 5.19000000  |
| C | 6.17700000  | 15.11600000 | 3.91400000  |
| C | 12.67100000 | 15.45500000 | 5.69100000  |
| C | 7.83700000  | 19.20400000 | 6.40700000  |
| C | 6.07800000  | 14.14400000 | 2.91700000  |
| C | 6.46700000  | 7.08700000  | 4.05600000  |
| C | 10.88900000 | 1.52700000  | 5.98100000  |
| C | 11.41700000 | 1.38400000  | 7.26700000  |
| C | 9.71700000  | 10.05700000 | 4.60300000  |
| C | 9.80800000  | 11.34000000 | 3.98000000  |
| C | 9.63000000  | 12.41500000 | 4.90300000  |
| C | 10.03400000 | 11.52200000 | 2.60700000  |
| C | 10.10900000 | 12.86900000 | 2.14800000  |
| C | 9.94700000  | 13.91600000 | 3.03900000  |
| C | 9.69700000  | 13.71000000 | 4.42400000  |
| C | 10.15100000 | 10.34200000 | 1.81900000  |
| C | 10.03800000 | 9.09500000  | 2.41300000  |
| C | 9.82000000  | 8.93000000  | 3.80700000  |
| C | 9.93600000  | 8.48300000  | 12.27800000 |
| C | 9.98400000  | 7.57900000  | 13.35000000 |
| C | 8.89900000  | 7.44100000  | 14.21000000 |
| C | 7.76100000  | 8.21800000  | 14.00300000 |
| C | 7.67400000  | 9.14500000  | 12.95000000 |
| C | 8.76300000  | 9.23700000  | 12.05100000 |
| C | 6.43200000  | 9.99700000  | 12.88500000 |
| C | 11.16100000 | 8.63000000  | 11.40500000 |
| C | 10.54700000 | 11.56700000 | 13.46800000 |
| C | 10.16400000 | 11.79200000 | 14.79200000 |

|   |             |             |             |
|---|-------------|-------------|-------------|
| C | 8.85500000  | 12.15700000 | 15.11300000 |
| C | 7.92300000  | 12.29300000 | 14.07500000 |
| C | 8.29000000  | 12.07600000 | 12.75200000 |
| C | 9.61400000  | 11.70600000 | 12.41700000 |
| C | 11.22900000 | 10.92000000 | 10.72000000 |
| H | 7.55700000  | 5.79800000  | 8.72600000  |
| H | 8.40800000  | 17.38200000 | 10.39100000 |
| H | 6.88900000  | 9.29000000  | 7.97500000  |
| H | 11.81800000 | 6.09500000  | 8.36000000  |
| H | 11.22700000 | 12.59600000 | 8.92900000  |
| H | 10.07700000 | 15.98500000 | 9.64300000  |
| H | 6.15000000  | 9.03300000  | 10.19000000 |
| H | 7.86300000  | 2.55600000  | 8.53100000  |
| H | 5.00600000  | 17.69400000 | 8.87900000  |
| H | 4.91200000  | 9.63500000  | 6.53000000  |
| H | 6.03700000  | 15.26200000 | 8.38400000  |
| H | 6.73600000  | 11.88400000 | 7.05900000  |
| H | 13.58000000 | 15.18600000 | 8.94300000  |
| H | 6.01500000  | 1.82100000  | 10.00900000 |
| H | 10.78800000 | 4.40400000  | 9.77600000  |
| H | 5.22200000  | 6.01600000  | 7.26600000  |
| H | 11.69000000 | 6.11500000  | 5.89900000  |
| H | 6.24100000  | 11.36500000 | 4.87800000  |
| H | 14.63700000 | 16.13600000 | 10.96100000 |
| H | 2.93300000  | 17.41100000 | 10.20800000 |
| H | 7.34300000  | 16.34800000 | 12.23800000 |
| H | 4.02500000  | 9.45300000  | 4.22600000  |
| H | 3.55800000  | 5.02600000  | 8.80700000  |
| H | 7.23000000  | 19.75700000 | 10.19400000 |
| H | 4.45200000  | 8.07100000  | 11.72700000 |
| H | 12.79700000 | 10.37000000 | 9.14900000  |

|   |             |             |             |
|---|-------------|-------------|-------------|
| H | 9.36800000  | 5.08700000  | 11.68100000 |
| H | 13.30500000 | 10.09100000 | 5.47900000  |
| H | 5.82500000  | 11.93100000 | 9.55000000  |
| H | 5.27700000  | 16.10400000 | 13.58400000 |
| H | 13.92800000 | 6.56300000  | 7.48000000  |
| H | 3.05500000  | 16.62500000 | 12.57100000 |
| H | 11.75900000 | 9.63700000  | 7.21000000  |
| H | 10.42700000 | 13.53100000 | 11.37200000 |
| H | 14.74900000 | 10.29000000 | 10.66300000 |
| H | 5.84800000  | 2.69400000  | 12.33900000 |
| H | 7.25900000  | 21.69300000 | 8.65500000  |
| H | 13.59400000 | 15.81000000 | 13.20500000 |
| H | 3.15300000  | 6.05000000  | 11.04600000 |
| H | 6.38300000  | 15.51800000 | 6.01800000  |
| H | 11.51100000 | 2.18900000  | 9.26700000  |
| H | 12.96800000 | 12.03900000 | 7.49200000  |
| H | 3.94700000  | 13.92100000 | 6.21800000  |
| H | 11.48200000 | 14.47400000 | 13.39100000 |
| H | 7.80100000  | 6.56000000  | 5.66900000  |
| H | 7.54100000  | 4.33900000  | 13.16100000 |
| H | 7.64100000  | 21.34900000 | 6.21000000  |
| H | 8.00900000  | 17.10900000 | 6.89000000  |
| H | 11.22700000 | 15.96400000 | 7.21000000  |
| H | 1.77400000  | 13.85000000 | 7.39800000  |
| H | 9.07200000  | 4.37000000  | 6.46800000  |
| H | 15.83900000 | 6.44700000  | 9.03700000  |
| H | 12.59200000 | 5.51600000  | 3.68400000  |
| H | 5.01300000  | 7.80600000  | 2.62700000  |
| H | 14.19600000 | 9.49400000  | 3.25000000  |
| H | 14.32300000 | 12.48800000 | 5.46400000  |
| H | 6.03600000  | 12.02100000 | 2.50600000  |

|   |             |             |             |
|---|-------------|-------------|-------------|
| H | 3.64300000  | 11.82600000 | 10.71300000 |
| H | 13.85400000 | 7.19600000  | 2.33600000  |
| H | 9.62700000  | 2.72500000  | 4.69900000  |
| H | 1.60000000  | 12.78800000 | 9.64900000  |
| H | 16.27800000 | 8.31400000  | 10.63400000 |
| H | 14.13900000 | 14.68600000 | 4.29900000  |
| H | 6.16300000  | 16.17500000 | 3.65000000  |
| H | 12.59000000 | 16.42500000 | 5.19400000  |
| H | 8.01100000  | 19.04000000 | 5.34100000  |
| H | 5.99200000  | 14.43600000 | 1.86800000  |
| H | 6.90700000  | 6.36300000  | 3.36600000  |
| H | 11.13700000 | 0.80300000  | 5.20200000  |
| H | 12.07900000 | 0.54700000  | 7.49800000  |
| H | 10.32800000 | 10.42300000 | 0.74300000  |
| H | 10.12800000 | 8.20000000  | 1.79500000  |
| H | 9.75200000  | 7.92600000  | 4.22400000  |
| H | 10.29000000 | 13.07200000 | 1.09000000  |
| H | 10.00200000 | 14.94300000 | 2.67100000  |
| H | 9.56200000  | 14.57000000 | 5.08000000  |
| H | 10.89700000 | 6.99800000  | 13.51400000 |
| H | 6.91300000  | 8.12700000  | 14.68700000 |
| H | 6.19700000  | 10.33400000 | 11.86800000 |
| H | 6.56000000  | 10.90900000 | 13.48700000 |
| H | 5.57000000  | 9.45100000  | 13.29500000 |
| H | 11.45800000 | 7.67600000  | 10.94200000 |
| H | 12.02200000 | 8.99100000  | 11.99100000 |
| H | 11.00400000 | 9.35800000  | 10.58900000 |
| H | 8.94300000  | 6.75100000  | 15.05400000 |
| H | 7.55200000  | 12.18600000 | 11.95200000 |
| H | 11.57500000 | 11.27600000 | 13.25200000 |
| H | 10.90800000 | 11.67700000 | 15.58400000 |

|     |             |             |             |
|-----|-------------|-------------|-------------|
| H   | 6.89100000  | 12.57400000 | 14.30300000 |
| H   | 8.56000000  | 12.32600000 | 16.15100000 |
| H   | 9.51400000  | 12.18400000 | 10.49200000 |
| H   | 12.07800000 | 11.56400000 | 11.00200000 |
| H   | 11.24400000 | 10.80900000 | 9.63000000  |
| H   | 11.38900000 | 9.92600000  | 11.17900000 |
| Cl  | 7.35900000  | 11.64300000 | 9.72200000  |
| IM4 |             |             |             |
| Pd  | 9.26900000  | 10.24300000 | 10.77200000 |
| N   | 9.23600000  | 12.08300000 | 7.88900000  |
| N   | 9.34500000  | 9.89200000  | 7.71100000  |
| N   | 10.33000000 | 11.52100000 | 12.02800000 |
| C   | 8.45400000  | 6.40700000  | 8.77600000  |
| C   | 9.20400000  | 10.90900000 | 8.65700000  |
| C   | 8.29400000  | 7.73400000  | 8.35600000  |
| C   | 9.70800000  | 5.80500000  | 8.87100000  |
| C   | 11.88700000 | 14.69100000 | 10.32800000 |
| C   | 9.42900000  | 11.78200000 | 6.54400000  |
| C   | 8.03700000  | 16.00000000 | 9.12800000  |
| C   | 9.46400000  | 10.40400000 | 6.43000000  |
| C   | 7.60700000  | 17.36600000 | 9.66100000  |
| C   | 9.77900000  | 14.28100000 | 8.94600000  |
| C   | 6.88300000  | 8.29000000  | 8.12300000  |
| C   | 6.45300000  | 8.23000000  | 6.65400000  |
| C   | 10.83100000 | 6.56000000  | 8.52400000  |
| C   | 11.24900000 | 13.91400000 | 9.16400000  |
| C   | 9.34500000  | 15.55900000 | 9.32300000  |
| C   | 5.76500000  | 7.63900000  | 8.94600000  |
| C   | 5.20200000  | 8.33200000  | 10.02300000 |
| C   | 10.22700000 | 3.44500000  | 8.09200000  |
| C   | 7.72000000  | 3.03800000  | 9.60800000  |

|   |             |             |             |
|---|-------------|-------------|-------------|
| C | 5.05700000  | 17.36500000 | 9.98200000  |
| C | 8.77600000  | 3.78700000  | 10.14600000 |
| C | 5.43900000  | 9.09800000  | 6.22000000  |
| C | 7.15200000  | 15.13700000 | 8.47900000  |
| C | 6.53000000  | 13.05300000 | 7.21700000  |
| C | 13.06200000 | 15.44100000 | 10.18800000 |
| C | 6.46200000  | 13.48300000 | 5.74700000  |
| C | 7.51100000  | 18.47600000 | 8.61200000  |
| C | 6.34600000  | 17.19900000 | 10.50900000 |
| C | 5.14300000  | 13.04700000 | 7.87200000  |
| C | 8.85300000  | 13.41400000 | 8.32400000  |
| C | 10.74800000 | 7.88900000  | 8.10000000  |
| C | 6.70000000  | 2.55200000  | 10.43100000 |
| C | 9.90700000  | 4.34600000  | 9.28400000  |
| C | 7.53900000  | 13.86400000 | 8.03300000  |
| C | 5.20900000  | 6.39700000  | 8.59500000  |
| C | 12.38500000 | 8.28500000  | 6.17300000  |
| C | 12.22600000 | 7.01300000  | 5.60800000  |
| C | 6.28400000  | 12.49500000 | 4.76900000  |
| C | 13.61900000 | 16.11900000 | 11.28100000 |
| C | 3.92500000  | 17.08200000 | 10.75700000 |
| C | 12.04100000 | 14.05800000 | 7.86600000  |
| C | 6.47200000  | 16.77600000 | 11.84400000 |
| C | 4.91300000  | 9.00300000  | 4.93200000  |
| C | 4.14200000  | 5.86000000  | 9.31600000  |
| C | 7.20800000  | 19.78100000 | 9.03900000  |
| C | 13.26000000 | 8.41800000  | 8.49600000  |
| C | 4.12600000  | 7.80500000  | 10.74200000 |
| C | 13.66300000 | 9.44800000  | 9.35300000  |
| C | 8.78700000  | 4.03500000  | 11.52600000 |
| C | 12.99800000 | 9.28200000  | 5.39900000  |

|   |             |             |             |
|---|-------------|-------------|-------------|
| C | 4.96400000  | 12.36200000 | 9.08800000  |
| C | 5.34500000  | 16.51000000 | 12.62900000 |
| C | 14.07400000 | 7.27600000  | 8.41800000  |
| C | 4.06300000  | 16.65300000 | 12.08100000 |
| C | 12.01200000 | 8.61400000  | 7.62400000  |
| C | 11.28500000 | 14.63200000 | 11.59900000 |
| C | 14.81700000 | 9.34400000  | 10.13300000 |
| C | 6.72300000  | 2.80200000  | 11.80500000 |
| C | 7.14900000  | 20.83900000 | 8.13300000  |
| C | 13.00900000 | 16.05500000 | 12.53200000 |
| C | 9.46000000  | 8.49000000  | 8.07100000  |
| C | 3.59200000  | 6.56400000  | 10.39100000 |
| C | 6.50000000  | 14.82100000 | 5.33200000  |
| C | 11.05200000 | 2.32500000  | 8.28000000  |
| C | 12.92700000 | 13.04900000 | 7.46500000  |
| C | 4.03500000  | 13.69300000 | 7.30600000  |
| C | 11.84100000 | 15.30100000 | 12.68800000 |
| C | 6.92500000  | 7.26200000  | 5.76000000  |
| C | 7.77200000  | 3.54600000  | 12.34900000 |
| C | 7.39100000  | 20.61400000 | 6.77400000  |
| C | 7.76700000  | 18.26700000 | 7.25100000  |
| C | 11.96300000 | 15.22200000 | 7.08500000  |
| C | 2.79000000  | 13.66800000 | 7.94600000  |
| C | 9.68900000  | 3.66600000  | 6.81700000  |
| C | 15.22400000 | 7.16000000  | 9.20100000  |
| C | 12.68700000 | 6.74100000  | 4.31500000  |
| C | 5.39200000  | 8.03100000  | 4.04800000  |
| C | 13.45100000 | 9.01800000  | 4.10800000  |
| C | 13.71200000 | 13.19300000 | 6.32000000  |
| C | 6.14700000  | 12.82800000 | 3.42100000  |
| C | 3.71900000  | 12.32500000 | 9.72600000  |

|   |             |             |             |
|---|-------------|-------------|-------------|
| C | 13.30500000 | 7.74000000  | 3.56100000  |
| C | 9.95700000  | 2.78800000  | 5.76200000  |
| C | 2.62600000  | 12.98800000 | 9.15400000  |
| C | 15.60100000 | 8.19100000  | 10.06500000 |
| C | 13.62900000 | 14.35700000 | 5.55300000  |
| C | 6.36300000  | 15.16100000 | 3.98300000  |
| C | 12.75000000 | 15.37200000 | 5.94200000  |
| C | 7.70300000  | 19.32700000 | 6.33900000  |
| C | 6.18700000  | 14.16500000 | 3.02000000  |
| C | 6.40000000  | 7.16200000  | 4.46800000  |
| C | 10.77800000 | 1.67700000  | 5.96400000  |
| C | 11.32600000 | 1.44900000  | 7.22800000  |
| C | 9.61400000  | 10.02400000 | 5.02900000  |
| C | 9.73300000  | 11.27400000 | 4.34900000  |
| C | 9.63600000  | 12.39300000 | 5.23400000  |
| C | 9.92100000  | 11.39000000 | 2.96400000  |
| C | 10.05000000 | 12.71000000 | 2.44700000  |
| C | 9.97500000  | 13.79900000 | 3.29800000  |
| C | 9.76100000  | 13.66200000 | 4.69600000  |
| C | 9.96000000  | 10.17500000 | 2.22300000  |
| C | 9.81800000  | 8.95900000  | 2.87300000  |
| C | 9.64500000  | 8.86300000  | 4.27900000  |
| C | 10.28300000 | 8.01500000  | 12.51700000 |
| C | 10.15500000 | 7.02300000  | 13.50200000 |
| C | 8.98400000  | 6.89700000  | 14.24800000 |
| C | 7.91800000  | 7.75700000  | 13.99500000 |
| C | 8.01000000  | 8.76600000  | 13.02200000 |
| C | 9.20500000  | 8.89900000  | 12.27700000 |
| C | 6.80200000  | 9.63900000  | 12.80400000 |
| C | 11.57100000 | 8.06200000  | 11.73900000 |
| C | 10.93400000 | 11.67500000 | 14.42700000 |

|   |             |             |             |
|---|-------------|-------------|-------------|
| C | 10.55300000 | 11.96300000 | 15.73800000 |
| C | 9.23500000  | 12.30600000 | 16.04100000 |
| C | 8.29800000  | 12.38100000 | 15.00000000 |
| C | 8.66900000  | 12.10500000 | 13.69200000 |
| C | 9.99200000  | 11.72400000 | 13.36700000 |
| C | 11.75700000 | 11.38000000 | 11.78800000 |
| H | 7.56600000  | 5.83600000  | 9.05100000  |
| H | 8.40500000  | 17.68100000 | 10.35700000 |
| H | 6.89900000  | 9.35300000  | 8.41200000  |
| H | 11.81700000 | 6.09800000  | 8.60300000  |
| H | 11.27200000 | 12.84900000 | 9.44500000  |
| H | 10.05900000 | 16.22200000 | 9.81800000  |
| H | 5.61000000  | 9.30300000  | 10.30600000 |
| H | 7.69900000  | 2.82600000  | 8.53800000  |
| H | 4.93400000  | 17.72000000 | 8.95600000  |
| H | 5.03700000  | 9.83900000  | 6.91700000  |
| H | 6.12200000  | 15.45300000 | 8.30600000  |
| H | 6.86900000  | 12.00500000 | 7.21600000  |
| H | 13.55700000 | 15.50100000 | 9.21800000  |
| H | 5.88100000  | 1.97600000  | 9.99400000  |
| H | 10.80800000 | 4.33800000  | 9.92300000  |
| H | 5.59400000  | 5.85200000  | 7.73100000  |
| H | 11.73000000 | 6.22000000  | 6.17200000  |
| H | 6.26200000  | 11.44400000 | 5.06300000  |
| H | 14.53700000 | 16.69400000 | 11.14700000 |
| H | 2.93100000  | 17.19200000 | 10.31900000 |
| H | 7.47100000  | 16.64000000 | 12.26800000 |
| H | 4.12100000  | 9.68700000  | 4.62000000  |
| H | 3.73000000  | 4.89100000  | 9.02700000  |
| H | 7.02100000  | 19.97200000 | 10.09900000 |
| H | 3.70600000  | 8.37100000  | 11.57600000 |

|   |             |             |             |
|---|-------------|-------------|-------------|
| H | 13.05500000 | 10.35000000 | 9.41800000  |
| H | 9.58900000  | 4.63500000  | 11.96300000 |
| H | 13.11400000 | 10.28500000 | 5.81600000  |
| H | 5.81500000  | 11.84300000 | 9.54100000  |
| H | 5.46500000  | 16.15300000 | 13.65300000 |
| H | 13.83300000 | 6.47900000  | 7.71200000  |
| H | 3.18500000  | 16.41100000 | 12.68300000 |
| H | 11.79600000 | 9.69300000  | 7.65400000  |
| H | 10.38700000 | 14.02400000 | 11.73900000 |
| H | 15.10100000 | 10.16700000 | 10.79200000 |
| H | 5.92700000  | 2.42100000  | 12.44700000 |
| H | 6.92700000  | 21.84600000 | 8.49100000  |
| H | 13.44300000 | 16.57900000 | 13.38500000 |
| H | 2.74700000  | 6.15100000  | 10.94600000 |
| H | 6.64300000  | 15.61800000 | 6.06300000  |
| H | 11.47900000 | 2.13600000  | 9.26800000  |
| H | 13.01400000 | 12.14200000 | 8.06700000  |
| H | 4.14000000  | 14.21600000 | 6.35500000  |
| H | 11.37000000 | 15.21900000 | 13.66900000 |
| H | 7.70800000  | 6.57000000  | 6.08000000  |
| H | 7.80000000  | 3.75800000  | 13.42000000 |
| H | 7.34600000  | 21.44200000 | 6.06300000  |
| H | 8.03600000  | 17.27000000 | 6.89800000  |
| H | 11.28400000 | 16.02300000 | 7.38200000  |
| H | 1.94300000  | 14.18200000 | 7.48600000  |
| H | 9.05300000  | 4.53700000  | 6.64600000  |
| H | 15.84300000 | 6.26400000  | 9.11900000  |
| H | 12.55900000 | 5.73900000  | 3.89900000  |
| H | 4.98200000  | 7.95400000  | 3.04000000  |
| H | 13.91300000 | 9.81500000  | 3.52200000  |
| H | 14.40000000 | 12.39700000 | 6.03000000  |

|   |             |             |             |
|---|-------------|-------------|-------------|
| H | 6.02100000  | 12.03600000 | 2.67900000  |
| H | 3.61700000  | 11.81200000 | 10.68900000 |
| H | 13.66200000 | 7.52800000  | 2.55100000  |
| H | 9.52300000  | 2.97700000  | 4.77700000  |
| H | 1.65400000  | 12.96500000 | 9.65200000  |
| H | 16.50600000 | 8.10300000  | 10.67000000 |
| H | 14.23800000 | 14.47100000 | 4.65500000  |
| H | 6.40200000  | 16.21100000 | 3.68500000  |
| H | 12.67900000 | 16.28800000 | 5.35200000  |
| H | 7.90800000  | 19.14100000 | 5.28200000  |
| H | 6.08800000  | 14.43000000 | 1.96500000  |
| H | 6.78200000  | 6.39900000  | 3.78600000  |
| H | 10.99000000 | 0.99200000  | 5.13900000  |
| H | 11.97100000 | 0.58400000  | 7.39800000  |
| H | 10.10400000 | 10.20600000 | 1.13900000  |
| H | 9.85100000  | 8.03700000  | 2.29000000  |
| H | 9.55300000  | 7.88200000  | 4.74100000  |
| H | 10.20800000 | 12.85700000 | 1.37500000  |
| H | 10.07500000 | 14.80400000 | 2.88500000  |
| H | 9.69700000  | 14.55400000 | 5.32000000  |
| H | 11.00000000 | 6.35100000  | 13.68500000 |
| H | 6.99100000  | 7.66700000  | 14.57200000 |
| H | 6.92100000  | 10.27900000 | 11.91600000 |
| H | 6.60200000  | 10.30500000 | 13.65400000 |
| H | 5.90800000  | 9.01800000  | 12.66200000 |
| H | 11.79900000 | 7.08100000  | 11.29600000 |
| H | 12.42700000 | 8.32500000  | 12.37800000 |
| H | 11.51200000 | 8.78600000  | 10.92000000 |
| H | 8.90100000  | 6.13200000  | 15.02400000 |
| H | 7.92600000  | 12.15900000 | 12.89400000 |
| H | 11.97100000 | 11.40000000 | 14.23200000 |

|     |             |             |             |
|-----|-------------|-------------|-------------|
| H   | 11.30100000 | 11.90200000 | 16.53400000 |
| H   | 7.26100000  | 12.65300000 | 15.20500000 |
| H   | 8.93800000  | 12.51200000 | 17.07100000 |
| H   | 12.29300000 | 12.25900000 | 12.19300000 |
| H   | 11.93000000 | 11.35600000 | 10.70500000 |
| H   | 12.22700000 | 10.48000000 | 12.22700000 |
| Cl  | 7.36100000  | 11.71700000 | 11.14500000 |
| Na  | 5.63200000  | 13.25200000 | 11.98800000 |
| IM5 |             |             |             |
| Pd  | 9.03500000  | 10.26000000 | 10.80000000 |
| N   | 9.26800000  | 12.09500000 | 7.90000000  |
| N   | 9.28400000  | 9.90500000  | 7.71600000  |
| N   | 9.78000000  | 11.71000000 | 12.10200000 |
| C   | 8.42800000  | 6.40100000  | 8.77500000  |
| C   | 9.15400000  | 10.92600000 | 8.66300000  |
| C   | 8.24200000  | 7.72500000  | 8.35100000  |
| C   | 9.69200000  | 5.82200000  | 8.89100000  |
| C   | 12.03400000 | 14.76300000 | 10.12000000 |
| C   | 9.47700000  | 11.79200000 | 6.56200000  |
| C   | 8.09400000  | 16.03400000 | 9.06200000  |
| C   | 9.46000000  | 10.41700000 | 6.43800000  |
| C   | 7.65700000  | 17.38100000 | 9.64300000  |
| C   | 9.86900000  | 14.35700000 | 8.79300000  |
| C   | 6.82100000  | 8.25500000  | 8.11400000  |
| C   | 6.39700000  | 8.22400000  | 6.64000000  |
| C   | 10.80400000 | 6.59700000  | 8.55400000  |
| C   | 11.34600000 | 13.99500000 | 8.97600000  |
| C   | 9.43400000  | 15.64900000 | 9.12200000  |
| C   | 5.69800000  | 7.57200000  | 8.90900000  |
| C   | 5.05400000  | 8.27300000  | 9.93500000  |
| C   | 10.21200000 | 3.45600000  | 8.11700000  |

|   |             |             |             |
|---|-------------|-------------|-------------|
| C | 7.72300000  | 3.06200000  | 9.67200000  |
| C | 5.12000000  | 17.36000000 | 10.02700000 |
| C | 8.79300000  | 3.80500000  | 10.19000000 |
| C | 5.39800000  | 9.11600000  | 6.21700000  |
| C | 7.18100000  | 15.12700000 | 8.52500000  |
| C | 6.55800000  | 13.02400000 | 7.30300000  |
| C | 13.36700000 | 15.18700000 | 10.00700000 |
| C | 6.46100000  | 13.45800000 | 5.83400000  |
| C | 7.52000000  | 18.52200000 | 8.63400000  |
| C | 6.42100000  | 17.18200000 | 10.51900000 |
| C | 5.18900000  | 12.97000000 | 7.99500000  |
| C | 8.90900000  | 13.44600000 | 8.29700000  |
| C | 10.69500000 | 7.92200000  | 8.12300000  |
| C | 6.72000000  | 2.57300000  | 10.51400000 |
| C | 9.90700000  | 4.36700000  | 9.30700000  |
| C | 7.57400000  | 13.86100000 | 8.07700000  |
| C | 5.20200000  | 6.30000000  | 8.57000000  |
| C | 12.33700000 | 8.31500000  | 6.20100000  |
| C | 12.16700000 | 7.04300000  | 5.63900000  |
| C | 6.35600000  | 12.47300000 | 4.84200000  |
| C | 14.00300000 | 15.86700000 | 11.05100000 |
| C | 4.01200000  | 17.05700000 | 10.82200000 |
| C | 12.15000000 | 14.12300000 | 7.68200000  |
| C | 6.58400000  | 16.71900000 | 11.83300000 |
| C | 4.87600000  | 9.04900000  | 4.92600000  |
| C | 4.12400000  | 5.74100000  | 9.25700000  |
| C | 7.16700000  | 19.79900000 | 9.10600000  |
| C | 13.19000000 | 8.50400000  | 8.53400000  |
| C | 3.96200000  | 7.72500000  | 10.61400000 |
| C | 13.54600000 | 9.53500000  | 9.41400000  |
| C | 8.83400000  | 4.04500000  | 11.57100000 |

|   |             |             |             |
|---|-------------|-------------|-------------|
| C | 12.96800000 | 9.30300000  | 5.43000000  |
| C | 5.10100000  | 12.38600000 | 9.27000000  |
| C | 5.47900000  | 16.42000000 | 12.63000000 |
| C | 14.03800000 | 7.38900000  | 8.44900000  |
| C | 4.18700000  | 16.58100000 | 12.12300000 |
| C | 11.94900000 | 8.66300000  | 7.64600000  |
| C | 11.36600000 | 15.02400000 | 11.32900000 |
| C | 14.69800000 | 9.45500000  | 10.19900000 |
| C | 6.77700000  | 2.80800000  | 11.88900000 |
| C | 7.08000000  | 20.88700000 | 8.23900000  |
| C | 13.31400000 | 16.15200000 | 12.22900000 |
| C | 9.39900000  | 8.50200000  | 8.07500000  |
| C | 3.49600000  | 6.45200000  | 10.28400000 |
| C | 6.44100000  | 14.80100000 | 5.43100000  |
| C | 11.03600000 | 2.33700000  | 8.30800000  |
| C | 12.99600000 | 13.08100000 | 7.28500000  |
| C | 4.01500000  | 13.44500000 | 7.39700000  |
| C | 11.99300000 | 15.71900000 | 12.36400000 |
| C | 6.86000000  | 7.26500000  | 5.73200000  |
| C | 7.83800000  | 3.55000000  | 12.41400000 |
| C | 7.34200000  | 20.72200000 | 6.87500000  |
| C | 7.78400000  | 18.37100000 | 7.26800000  |
| C | 12.15100000 | 15.30500000 | 6.92800000  |
| C | 2.78300000  | 13.33200000 | 8.04900000  |
| C | 9.66400000  | 3.66700000  | 6.84500000  |
| C | 15.18200000 | 7.29500000  | 9.24400000  |
| C | 12.62800000 | 6.76500000  | 4.34700000  |
| C | 5.34200000  | 8.08400000  | 4.02900000  |
| C | 13.42200000 | 9.03200000  | 4.14000000  |
| C | 13.82800000 | 13.20900000 | 6.16900000  |
| C | 6.22800000  | 12.81200000 | 3.49400000  |

|   |             |             |             |
|---|-------------|-------------|-------------|
| C | 3.87300000  | 12.26900000 | 9.91900000  |
| C | 13.25700000 | 7.75600000  | 3.59300000  |
| C | 9.92300000  | 2.77800000  | 5.79600000  |
| C | 2.70600000  | 12.74100000 | 9.30900000  |
| C | 15.51800000 | 8.32800000  | 10.12200000 |
| C | 13.82100000 | 14.39200000 | 5.42600000  |
| C | 6.31200000  | 15.14600000 | 4.08200000  |
| C | 12.97800000 | 15.43900000 | 5.81200000  |
| C | 7.69400000  | 19.46100000 | 6.39400000  |
| C | 6.20300000  | 14.15300000 | 3.10700000  |
| C | 6.33600000  | 7.19400000  | 4.43700000  |
| C | 10.74000000 | 1.66600000  | 6.00200000  |
| C | 11.30000000 | 1.45000000  | 7.26500000  |
| C | 9.60200000  | 10.04700000 | 5.03000000  |
| C | 9.76100000  | 11.30200000 | 4.36500000  |
| C | 9.69700000  | 12.41300000 | 5.26100000  |
| C | 9.94400000  | 11.43100000 | 2.98000000  |
| C | 10.09900000 | 12.75600000 | 2.48000000  |
| C | 10.05100000 | 13.83600000 | 3.34600000  |
| C | 9.84100000  | 13.68700000 | 4.74500000  |
| C | 9.94300000  | 10.22400000 | 2.22200000  |
| C | 9.76800000  | 9.00600000  | 2.85800000  |
| C | 9.59900000  | 8.89600000  | 4.26400000  |
| C | 10.21500000 | 8.16800000  | 12.53400000 |
| C | 10.25000000 | 7.16000000  | 13.50700000 |
| C | 9.12400000  | 6.85400000  | 14.26600000 |
| C | 7.94400000  | 7.55300000  | 14.03100000 |
| C | 7.87800000  | 8.59000000  | 13.08300000 |
| C | 9.02800000  | 8.91300000  | 12.32200000 |
| C | 6.54000000  | 9.27000000  | 12.91900000 |
| C | 11.46200000 | 8.39200000  | 11.71900000 |

|   |             |             |             |
|---|-------------|-------------|-------------|
| C | 10.08500000 | 11.83600000 | 14.56200000 |
| C | 9.52800000  | 11.99200000 | 15.83000000 |
| C | 8.15200000  | 12.16500000 | 15.99000000 |
| C | 7.34200000  | 12.21800000 | 14.84900000 |
| C | 7.89200000  | 12.08100000 | 13.58200000 |
| C | 9.27600000  | 11.84700000 | 13.39600000 |
| C | 11.23500000 | 11.69200000 | 12.04300000 |
| H | 7.55100000  | 5.80900000  | 9.03900000  |
| H | 8.47100000  | 17.68700000 | 10.32600000 |
| H | 6.81200000  | 9.31100000  | 8.42600000  |
| H | 11.79800000 | 6.15600000  | 8.63900000  |
| H | 11.37200000 | 12.92500000 | 9.25200000  |
| H | 10.16500000 | 16.35800000 | 9.51300000  |
| H | 5.40300000  | 9.27200000  | 10.20000000 |
| H | 7.67900000  | 2.85100000  | 8.60200000  |
| H | 4.97400000  | 17.74100000 | 9.01500000  |
| H | 5.00700000  | 9.85700000  | 6.92000000  |
| H | 6.12400000  | 15.39200000 | 8.46300000  |
| H | 6.92100000  | 11.98400000 | 7.28700000  |
| H | 13.91900000 | 14.98700000 | 9.08900000  |
| H | 5.89100000  | 2.00100000  | 10.09100000 |
| H | 10.81700000 | 4.36400000  | 9.93200000  |
| H | 5.63900000  | 5.74400000  | 7.73800000  |
| H | 11.66400000 | 6.25400000  | 6.20300000  |
| H | 6.38500000  | 11.41900000 | 5.12600000  |
| H | 15.04300000 | 16.18400000 | 10.92700000 |
| H | 3.00600000  | 17.19200000 | 10.41800000 |
| H | 7.59200000  | 16.57400000 | 12.23000000 |
| H | 4.10000000  | 9.75600000  | 4.62200000  |
| H | 3.76200000  | 4.74900000  | 8.97800000  |
| H | 6.95600000  | 19.93900000 | 10.16900000 |

|   |             |             |             |
|---|-------------|-------------|-------------|
| H | 3.47200000  | 8.30100000  | 11.40200000 |
| H | 12.90200000 | 10.41500000 | 9.49300000  |
| H | 9.64800000  | 4.64000000  | 11.99200000 |
| H | 13.09700000 | 10.30400000 | 5.84700000  |
| H | 6.01200000  | 12.02100000 | 9.75500000  |
| H | 5.62900000  | 16.05400000 | 13.64800000 |
| H | 13.82500000 | 6.59800000  | 7.72700000  |
| H | 3.32000000  | 16.33800000 | 12.74100000 |
| H | 11.71600000 | 9.73800000  | 7.65300000  |
| H | 10.33900000 | 14.67500000 | 11.46400000 |
| H | 14.95300000 | 10.27700000 | 10.87200000 |
| H | 6.00000000  | 2.41500000  | 12.54700000 |
| H | 6.81300000  | 21.87000000 | 8.63200000  |
| H | 13.79500000 | 16.70600000 | 13.03700000 |
| H | 2.64300000  | 6.02100000  | 10.81100000 |
| H | 6.53200000  | 15.59800000 | 6.17000000  |
| H | 11.47000000 | 2.15500000  | 9.29600000  |
| H | 13.01500000 | 12.16100000 | 7.87600000  |
| H | 4.06000000  | 13.90000000 | 6.40500000  |
| H | 11.44200000 | 15.92200000 | 13.28300000 |
| H | 7.63400000  | 6.55800000  | 6.04000000  |
| H | 7.89300000  | 3.75200000  | 13.48600000 |
| H | 7.27900000  | 21.57500000 | 6.19600000  |
| H | 8.07700000  | 17.39300000 | 6.88100000  |
| H | 11.51000000 | 16.13600000 | 7.22800000  |
| H | 1.88100000  | 13.70500000 | 7.55900000  |
| H | 9.02800000  | 4.53800000  | 6.67000000  |
| H | 15.82600000 | 6.41700000  | 9.15900000  |
| H | 12.48600000 | 5.76500000  | 3.93100000  |
| H | 4.93300000  | 8.02800000  | 3.01800000  |
| H | 13.89800000 | 9.82300000  | 3.55700000  |

|   |             |             |             |
|---|-------------|-------------|-------------|
| H | 14.49300000 | 12.38800000 | 5.89100000  |
| H | 6.16300000  | 12.02200000 | 2.74400000  |
| H | 3.82400000  | 11.80400000 | 10.90500000 |
| H | 13.60800000 | 7.54100000  | 2.58200000  |
| H | 9.48400000  | 2.96000000  | 4.81200000  |
| H | 1.74300000  | 12.64200000 | 9.81300000  |
| H | 16.42100000 | 8.26000000  | 10.73100000 |
| H | 14.47600000 | 14.50300000 | 4.56000000  |
| H | 6.30000000  | 16.20000000 | 3.79400000  |
| H | 12.97800000 | 16.37200000 | 5.24400000  |
| H | 7.90600000  | 19.32000000 | 5.33300000  |
| H | 6.11200000  | 14.42200000 | 2.05300000  |
| H | 6.71000000  | 6.43700000  | 3.74300000  |
| H | 10.94300000 | 0.97200000  | 5.18400000  |
| H | 11.94300000 | 0.58500000  | 7.43700000  |
| H | 10.07500000 | 10.26600000 | 1.13900000  |
| H | 9.76500000  | 8.09000000  | 2.26400000  |
| H | 9.47900000  | 7.91300000  | 4.71500000  |
| H | 10.25000000 | 12.91800000 | 1.41000000  |
| H | 10.16700000 | 14.84600000 | 2.94700000  |
| H | 9.79600000  | 14.57000000 | 5.38100000  |
| H | 11.18500000 | 6.61000000  | 13.65900000 |
| H | 7.04300000  | 7.30200000  | 14.59900000 |
| H | 6.57300000  | 10.04700000 | 12.14300000 |
| H | 6.20900000  | 9.72400000  | 13.86500000 |
| H | 5.77800000  | 8.53300000  | 12.62400000 |
| H | 11.90300000 | 7.43800000  | 11.39300000 |
| H | 12.23900000 | 8.92600000  | 12.28900000 |
| H | 11.23800000 | 8.98500000  | 10.82200000 |
| H | 9.16300000  | 6.07300000  | 15.02800000 |
| H | 7.25200000  | 12.13200000 | 12.69800000 |

|     |             |             |             |
|-----|-------------|-------------|-------------|
| H   | 11.15900000 | 11.67100000 | 14.48600000 |
| H   | 10.18500000 | 11.94700000 | 16.70400000 |
| H   | 6.26300000  | 12.35300000 | 14.95400000 |
| H   | 7.71600000  | 12.25400000 | 16.98400000 |
| H   | 11.63000000 | 12.63700000 | 12.46100000 |
| H   | 11.56700000 | 11.62600000 | 10.99600000 |
| H   | 11.71300000 | 10.86500000 | 12.59700000 |
| TS5 |             |             |             |
| Pd  | 9.10900000  | 10.27400000 | 10.73900000 |
| N   | 9.27000000  | 12.07600000 | 7.87000000  |
| N   | 9.29600000  | 9.88500000  | 7.68500000  |
| N   | 8.85400000  | 10.86500000 | 12.87000000 |
| C   | 8.43300000  | 6.38400000  | 8.73700000  |
| C   | 9.17200000  | 10.90600000 | 8.63400000  |
| C   | 8.25200000  | 7.71000000  | 8.31800000  |
| C   | 9.69600000  | 5.80300000  | 8.85400000  |
| C   | 12.01200000 | 14.69100000 | 10.16500000 |
| C   | 9.46800000  | 11.77400000 | 6.53100000  |
| C   | 8.09600000  | 15.99700000 | 9.08700000  |
| C   | 9.45800000  | 10.39900000 | 6.40700000  |
| C   | 7.66300000  | 17.34500000 | 9.66700000  |
| C   | 9.86300000  | 14.31300000 | 8.81500000  |
| C   | 6.83500000  | 8.25500000  | 8.10200000  |
| C   | 6.38700000  | 8.22700000  | 6.63700000  |
| C   | 10.81100000 | 6.57700000  | 8.52200000  |
| C   | 11.33200000 | 13.93100000 | 9.01200000  |
| C   | 9.43000000  | 15.59800000 | 9.16600000  |
| C   | 5.72600000  | 7.58500000  | 8.92300000  |
| C   | 5.13300000  | 8.28100000  | 9.97500000  |
| C   | 10.21100000 | 3.43200000  | 8.09000000  |
| C   | 7.71400000  | 3.07500000  | 9.65600000  |

|   |             |             |             |
|---|-------------|-------------|-------------|
| C | 5.12300000  | 17.32700000 | 10.01700000 |
| C | 8.80400000  | 3.79100000  | 10.16700000 |
| C | 5.38500000  | 9.12200000  | 6.23100000  |
| C | 7.18700000  | 15.10500000 | 8.52400000  |
| C | 6.55800000  | 13.01600000 | 7.28000000  |
| C | 13.30500000 | 15.18800000 | 10.05100000 |
| C | 6.46200000  | 13.46100000 | 5.81400000  |
| C | 7.54400000  | 18.48700000 | 8.65500000  |
| C | 6.41600000  | 17.16600000 | 10.53000000 |
| C | 5.19000000  | 12.96600000 | 7.97300000  |
| C | 8.90900000  | 13.42000000 | 8.28500000  |
| C | 10.70500000 | 7.90200000  | 8.09300000  |
| C | 6.71900000  | 2.58400000  | 10.50500000 |
| C | 9.91100000  | 4.34900000  | 9.27600000  |
| C | 7.57700000  | 13.84300000 | 8.06100000  |
| C | 5.19900000  | 6.32700000  | 8.59000000  |
| C | 12.35200000 | 8.30400000  | 6.18000000  |
| C | 12.18900000 | 7.03300000  | 5.61400000  |
| C | 6.34100000  | 12.48400000 | 4.81600000  |
| C | 13.92200000 | 15.86500000 | 11.10700000 |
| C | 4.00400000  | 17.05600000 | 10.80400000 |
| C | 12.15000000 | 14.04900000 | 7.72700000  |
| C | 6.56000000  | 16.75100000 | 11.85600000 |
| C | 4.84500000  | 9.06100000  | 4.94700000  |
| C | 4.14000000  | 5.77500000  | 9.30700000  |
| C | 7.18900000  | 19.76500000 | 9.12200000  |
| C | 13.19100000 | 8.47500000  | 8.52400000  |
| C | 4.06100000  | 7.74000000  | 10.68400000 |
| C | 13.51500000 | 9.47700000  | 9.44100000  |
| C | 8.87100000  | 4.00000000  | 11.55000000 |
| C | 12.97800000 | 9.29700000  | 5.41100000  |

|   |             |             |             |
|---|-------------|-------------|-------------|
| C | 5.10000000  | 12.37600000 | 9.24500000  |
| C | 5.44500000  | 16.48400000 | 12.64700000 |
| C | 14.05800000 | 7.37900000  | 8.41900000  |
| C | 4.16000000  | 16.62800000 | 12.11900000 |
| C | 11.96000000 | 8.64400000  | 7.62500000  |
| C | 11.36100000 | 14.87700000 | 11.38500000 |
| C | 14.65600000 | 9.38700000  | 10.23900000 |
| C | 6.80200000  | 2.79100000  | 11.88100000 |
| C | 7.11300000  | 20.85200000 | 8.25400000  |
| C | 13.25200000 | 16.07200000 | 12.29800000 |
| C | 9.41000000  | 8.48300000  | 8.04300000  |
| C | 3.56300000  | 6.48000000  | 10.35800000 |
| C | 6.45300000  | 14.80700000 | 5.42100000  |
| C | 11.03300000 | 2.31200000  | 8.28500000  |
| C | 13.02300000 | 13.02000000 | 7.36600000  |
| C | 4.01900000  | 13.45500000 | 7.38000000  |
| C | 11.96900000 | 15.56700000 | 12.43400000 |
| C | 6.83500000  | 7.27000000  | 5.71900000  |
| C | 7.88300000  | 3.50400000  | 12.40000000 |
| C | 7.38700000  | 20.68500000 | 6.89300000  |
| C | 7.82100000  | 18.33400000 | 7.29300000  |
| C | 12.13500000 | 15.20800000 | 6.94300000  |
| C | 2.78800000  | 13.35000000 | 8.03600000  |
| C | 9.66200000  | 3.63900000  | 6.81700000  |
| C | 15.19100000 | 7.27500000  | 9.22700000  |
| C | 12.65100000 | 6.76100000  | 4.32200000  |
| C | 5.29700000  | 8.09800000  | 4.04100000  |
| C | 13.43300000 | 9.03100000  | 4.12100000  |
| C | 13.86300000 | 13.13900000 | 6.25700000  |
| C | 6.21100000  | 12.83500000 | 3.47200000  |
| C | 3.87300000  | 12.26700000 | 9.89600000  |

|   |             |             |             |
|---|-------------|-------------|-------------|
| C | 13.27600000 | 7.75700000  | 3.57100000  |
| C | 9.91900000  | 2.74600000  | 5.77200000  |
| C | 2.70900000  | 12.75400000 | 9.29300000  |
| C | 15.49700000 | 8.28100000  | 10.13900000 |
| C | 13.83800000 | 14.29800000 | 5.48300000  |
| C | 6.32200000  | 15.16300000 | 4.07600000  |
| C | 12.97100000 | 15.33100000 | 5.83200000  |
| C | 7.74100000  | 19.42300000 | 6.41800000  |
| C | 6.19800000  | 14.17900000 | 3.09500000  |
| C | 6.29500000  | 7.20500000  | 4.43200000  |
| C | 10.73500000 | 1.63300000  | 5.98200000  |
| C | 11.29400000 | 1.42100000  | 7.24500000  |
| C | 9.59800000  | 10.02600000 | 5.00100000  |
| C | 9.75100000  | 11.28100000 | 4.33200000  |
| C | 9.68400000  | 12.39300000 | 5.22700000  |
| C | 9.93300000  | 11.40700000 | 2.94800000  |
| C | 10.08400000 | 12.73200000 | 2.44500000  |
| C | 10.03400000 | 13.81300000 | 3.30900000  |
| C | 9.82600000  | 13.66600000 | 4.70800000  |
| C | 9.93600000  | 10.19900000 | 2.19300000  |
| C | 9.76600000  | 8.98100000  | 2.83100000  |
| C | 9.59900000  | 8.87400000  | 4.23800000  |
| C | 10.01000000 | 8.66900000  | 12.31300000 |
| C | 9.93200000  | 7.48600000  | 12.54800000 |
| C | 8.72900000  | 6.95300000  | 12.86500000 |
| C | 7.59400000  | 7.61000000  | 12.92100000 |
| C | 7.63900000  | 8.80500000  | 12.71100000 |
| C | 8.86200000  | 9.34300000  | 12.40400000 |
| C | 6.34600000  | 9.43000000  | 12.80700000 |
| C | 11.34100000 | 9.11700000  | 11.96900000 |
| C | 8.91400000  | 12.51900000 | 14.46300000 |

|   |             |             |             |
|---|-------------|-------------|-------------|
| C | 8.29500000  | 13.38700000 | 15.09500000 |
| C | 7.02900000  | 13.50500000 | 14.83100000 |
| C | 6.39400000  | 12.76000000 | 13.89700000 |
| C | 7.00500000  | 11.90500000 | 13.25400000 |
| C | 8.28000000  | 11.73200000 | 13.53300000 |
| C | 10.16900000 | 10.90800000 | 13.15100000 |
| H | 7.55500000  | 5.79500000  | 9.00000000  |
| H | 8.47200000  | 17.64500000 | 10.35600000 |
| H | 6.84600000  | 9.31100000  | 8.41200000  |
| H | 11.80500000 | 6.13400000  | 8.61100000  |
| H | 11.34000000 | 12.86200000 | 9.29000000  |
| H | 10.15800000 | 16.29300000 | 9.58300000  |
| H | 5.51100000  | 9.26800000  | 10.23800000 |
| H | 7.65000000  | 2.88700000  | 8.58500000  |
| H | 4.99000000  | 17.67300000 | 8.99400000  |
| H | 5.00600000  | 9.86200000  | 6.94100000  |
| H | 6.13200000  | 15.37600000 | 8.45400000  |
| H | 6.91700000  | 11.97500000 | 7.25600000  |
| H | 13.84200000 | 15.04700000 | 9.12300000  |
| H | 5.87500000  | 2.03300000  | 10.08800000 |
| H | 10.82600000 | 4.35000000  | 9.89600000  |
| H | 5.59700000  | 5.77800000  | 7.74000000  |
| H | 11.68900000 | 6.24100000  | 6.17600000  |
| H | 6.35900000  | 11.42900000 | 5.09400000  |
| H | 14.93000000 | 16.24100000 | 10.98300000 |
| H | 3.00400000  | 17.17800000 | 10.38500000 |
| H | 7.56300000  | 16.62200000 | 12.26900000 |
| H | 4.06700000  | 9.76900000  | 4.65600000  |
| H | 3.75300000  | 4.79300000  | 9.03200000  |
| H | 6.96700000  | 19.90500000 | 10.18300000 |
| H | 3.61000000  | 8.31100000  | 11.49400000 |

|   |             |             |             |
|---|-------------|-------------|-------------|
| H | 12.85300000 | 10.33900000 | 9.53600000  |
| H | 9.70400000  | 4.56900000  | 11.96500000 |
| H | 13.10100000 | 10.29800000 | 5.83100000  |
| H | 6.00800000  | 12.00000000 | 9.72600000  |
| H | 5.58100000  | 16.15600000 | 13.67500000 |
| H | 13.86700000 | 6.61000000  | 7.67200000  |
| H | 3.28500000  | 16.41200000 | 12.73300000 |
| H | 11.72800000 | 9.71900000  | 7.63800000  |
| H | 10.36200000 | 14.47600000 | 11.51500000 |
| H | 14.88800000 | 10.18700000 | 10.94000000 |
| H | 6.03100000  | 2.39600000  | 12.54500000 |
| H | 6.84400000  | 21.83600000 | 8.64400000  |
| H | 13.71900000 | 16.62100000 | 13.11600000 |
| H | 2.72500000  | 6.05400000  | 10.91000000 |
| H | 6.55500000  | 15.59600000 | 6.16600000  |
| H | 11.46700000 | 2.13400000  | 9.27300000  |
| H | 13.05600000 | 12.11900000 | 7.98000000  |
| H | 4.06500000  | 13.91400000 | 6.39100000  |
| H | 11.43200000 | 15.71100000 | 13.36300000 |
| H | 7.61200000  | 6.56200000  | 6.01500000  |
| H | 7.95800000  | 3.68100000  | 13.47200000 |
| H | 7.33200000  | 21.53800000 | 6.21300000  |
| H | 8.11500000  | 17.35500000 | 6.91000000  |
| H | 11.47200000 | 16.02700000 | 7.21400000  |
| H | 1.88900000  | 13.73500000 | 7.55100000  |
| H | 9.03000000  | 4.51100000  | 6.64000000  |
| H | 15.85000000 | 6.41200000  | 9.12500000  |
| H | 12.51400000 | 5.76100000  | 3.90300000  |
| H | 4.87500000  | 8.04700000  | 3.03600000  |
| H | 13.90600000 | 9.82600000  | 3.54000000  |
| H | 14.54700000 | 12.32900000 | 6.00600000  |

|   |             |             |             |
|---|-------------|-------------|-------------|
| H | 6.13400000  | 12.05100000 | 2.71600000  |
| H | 3.82200000  | 11.79800000 | 10.88100000 |
| H | 13.62900000 | 7.54600000  | 2.56000000  |
| H | 9.48100000  | 2.92600000  | 4.78700000  |
| H | 1.74700000  | 12.66400000 | 9.80000000  |
| H | 16.39200000 | 8.20700000  | 10.75800000 |
| H | 14.49900000 | 14.40000000 | 4.62000000  |
| H | 6.31900000  | 16.21900000 | 3.79600000  |
| H | 12.95500000 | 16.24500000 | 5.24000000  |
| H | 7.96300000  | 19.28100000 | 5.35800000  |
| H | 6.10500000  | 14.45600000 | 2.04300000  |
| H | 6.65700000  | 6.45000000  | 3.73000000  |
| H | 10.93600000 | 0.93600000  | 5.16700000  |
| H | 11.93600000 | 0.55500000  | 7.42100000  |
| H | 10.06700000 | 10.23700000 | 1.10900000  |
| H | 9.76700000  | 8.06400000  | 2.24000000  |
| H | 9.48400000  | 7.89000000  | 4.69100000  |
| H | 10.23400000 | 12.89100000 | 1.37500000  |
| H | 10.14800000 | 14.82200000 | 2.90800000  |
| H | 9.77900000  | 14.55100000 | 5.34300000  |
| H | 10.84300000 | 6.94600000  | 12.49600000 |
| H | 6.64200000  | 7.19400000  | 13.14100000 |
| H | 6.35000000  | 10.40800000 | 12.41100000 |
| H | 6.01600000  | 9.51800000  | 13.82300000 |
| H | 5.64500000  | 8.82900000  | 12.24800000 |
| H | 11.85300000 | 8.49400000  | 11.33800000 |
| H | 12.00400000 | 9.19900000  | 12.75300000 |
| H | 11.22600000 | 10.00900000 | 11.53700000 |
| H | 8.68200000  | 6.02500000  | 13.06100000 |
| H | 6.50100000  | 11.33400000 | 12.52200000 |
| H | 9.90000000  | 12.43500000 | 14.71500000 |

|   |             |             |             |
|---|-------------|-------------|-------------|
| H | 8.81300000  | 13.95700000 | 15.81900000 |
| H | 5.40400000  | 12.83700000 | 13.67800000 |
| H | 6.54600000  | 14.16100000 | 15.34200000 |
| H | 10.37000000 | 11.87700000 | 13.12500000 |
| H | 10.53500000 | 10.21900000 | 12.56900000 |
| H | 10.68800000 | 10.68900000 | 13.94100000 |

Product: N,2,6-trimethyl-N-phenylaniline

|   |             |             |             |
|---|-------------|-------------|-------------|
| N | 9.42500000  | 10.78400000 | 14.81700000 |
| C | 10.29400000 | 9.67200000  | 12.81000000 |
| C | 10.15300000 | 8.68100000  | 11.83000000 |
| C | 8.99300000  | 7.91200000  | 11.75000000 |
| C | 7.93800000  | 8.15400000  | 12.62700000 |
| C | 8.03100000  | 9.14400000  | 13.61800000 |
| C | 9.22600000  | 9.88900000  | 13.71200000 |
| C | 6.87800000  | 9.38900000  | 14.55500000 |
| C | 11.56900000 | 10.46900000 | 12.91200000 |
| C | 9.43900000  | 12.97300000 | 15.88300000 |
| C | 9.05300000  | 14.31400000 | 15.90900000 |
| C | 8.28100000  | 14.86100000 | 14.88400000 |
| C | 7.91200000  | 14.03600000 | 13.81600000 |
| C | 8.29300000  | 12.69500000 | 13.76800000 |
| C | 9.05700000  | 12.12500000 | 14.81400000 |
| C | 10.17400000 | 10.23400000 | 15.93700000 |
| H | 10.97300000 | 8.50300000  | 11.13100000 |
| H | 7.03500000  | 7.54000000  | 12.56800000 |
| H | 6.17400000  | 10.11900000 | 14.12300000 |
| H | 7.21600000  | 9.80700000  | 15.51200000 |
| H | 6.31400000  | 8.46400000  | 14.74600000 |
| H | 12.14300000 | 10.39300000 | 11.97900000 |
| H | 12.22200000 | 10.10800000 | 13.72400000 |
| H | 11.36500000 | 11.52800000 | 13.12500000 |

|   |             |             |             |
|---|-------------|-------------|-------------|
| H | 8.91400000  | 7.10900000  | 11.01100000 |
| H | 7.99300000  | 12.08300000 | 12.91600000 |
| H | 10.04700000 | 12.58400000 | 16.69700000 |
| H | 9.37100000  | 14.93700000 | 16.74900000 |
| H | 7.31300000  | 14.44600000 | 12.99900000 |
| H | 7.97500000  | 15.90800000 | 14.91500000 |
| H | 9.64700000  | 10.39900000 | 16.89400000 |
| H | 10.27100000 | 9.15100000  | 15.78600000 |
| H | 11.18800000 | 10.66700000 | 16.02900000 |

## Reference

1. Q. Zhao, G. Meng, G. Li, C. Flach, R. Mendelsohn, R. Lalancette, R. Szostak and M. Szostak, *Chem. Sci.*, 2021, **12**, 10583-10589.
2. (a) P. Steinsoultz, A. Bailly, P. Wagner, E. Oliva, M. Schmitt, L. Grimaud and F. Bihel, *ACS Catal.*, 2021, **12**, 560-567. (b) Y. Liu, V. A. Voloshkin, T. Scattolin, M. Peng, K. Van Hecke, S. P. Nolan and C. S. J. Cazin, *Eur. J. Org. Chem.*, 2022, e202200309. (c) C. Affouard, R. D. Crockett, K. Diker, R. P. Farrell, G. Gorins, J. R. Huckins and S. Caille, *Org. Process Res. Dev.*, 2015, **19**, 476-485. (d) A. Komáromi and Z. Novák, *Adv. Synth. Catal.*, 2010, **352**, 1523-1532. (e) J.-S. Ouyang, S. Liu, B. Pan, Y. Zhang, H. Liang, B. Chen, X. He, W. T. K. Chan, A. S. C. Chan, T.-Y. Sun, Y.-D. Wu and L. Qiu, *ACS Catal.*, 2021, **11**, 9252-9261.
3. (a) J. L. Farmer, M. Pompeo, A. J. Lough and M. G. Organ, *Chem. Eur. J.* 2014, **20**, 15790-15798. (b) V. Semeniuchenko, W. M. Braje and Michael G. Organ, *Chem. Eur. J.* 2021, **27**, 12535-12539.
4. L. Rout, S. Jammi and T. Punniyamurthy, *Org. Lett.*, 2007, **9**, 3397-3399.
5. S. S. Kampmann, A. N. Sobolev, G. A. Koutsantonis and S. G. Stewart, *Adv. Synth. Catal.*, 2014, **356**, 1967-1973.
6. B. R. Walker, S. Manabe, A. T. Brusoe and C. S. Sevov, *J. Am. Chem. Soc.*, 2021, **143**, 6257-6265.
7. T. Seo, K. Kubota and H. Ito, *Angew. Chem. Int. Ed.*, 2023, **62**, e202311531.
8. W. Chen, K. Chen, W. Chen, M. Liu and H. Wu, *ACS Catal.*, 2019, **9**, 8110-8115.
9. A. Rühling, L. Rakers and F. Glorius, *ChemCatChem*, 2017, **9**, 547-550.
10. W. Chen, S. Zhang, G. Dai, Y. Chen, M. Li, X. Zhao, Y. Chen and L. Chen, *Chem. Eur. J.*, 2019, **25**, 469-473.

11. J. Düker, N. Petersen, N. Richter, P. Feuerer, T. Faber, N. Hölter, N. Kehl, J. Oboril, J. Strippel and A. Gröer, *Org. Lett.*, 2025, **27**, 5566–5571
12. Z. Chen, X. Chen and C. M. So, *J. Org. Chem.*, 2019, **84**, 6366-6376.
13. S. Rodriguez, B. Qu, N. Haddad, D. C. Reeves, W. Tang, H. Lee, D. Krishnamurthy and C. H. Senanayake, *Adv. Synth. Catal.*, 2011, **353**, 533-537.
14. K. Kubota, M. Takahashi, F. Puccetti and H. Ito, *Org. Lett.*, 2025, **27**, 5691-5696.
15. J. Li and Z.-X. Wang, *Org. Lett.*, 2017, **19**, 3723-3726.
16. T. N. Ansari, R. H. Choudhary, M. Nachtegaal, A. H. Clark, S. V. Plummer, J. B. Jasinski, F. Gallou and S. Handa, *ACS Catal.*, 2024, **14**, 4099-4107.
17. B. H. Lipshutz, D. W. Chung and B. Rich, *Adv. Synth. Catal.*, 2009, **351**, 1717-1721.
18. J. Lee, J. Lee, M. Kong, J. Kang, D. Lee, J. Lee, M. Kim and H. Kang, *Org. Lett.*, 2025, **27**, 9195-9200.
19. W. Yao, J. Wang, A. Zhong, J. Li and J. Yang, *Org. Lett.*, 2020, **22**, 8086-8090.
20. Z. C. Wang, Y. Y. Li, S. Q. Zhang, X. Hong and S. L. Shi, *Che. Sci.*, 2023, **14**, 4390-4396.
21. J. Jiang, H. Zhu, Y. Shen and T. Tu, *Org. Chem. Front.*, 2014, **1**, 1172-1175.
22. J. Nebauer, C. Neiß, M. Krug, A. Vogel, D. Fehn, S. Ozaki, F. Rominger, K. Meyer, K. Kamada and D. M. Guldi, *Angew. Chem. Int. Ed.*, 2022, **61**, e202205287.
23. T. Noël, J. R. Naber, R. L. Hartman, J. P. McMullen, K. F. Jensen and S. L. Buchwald, *Che. Sci.*, 2011, **2**, 287-290.
24. F. Chen, H. Geng, C. Li, J. Wang, B. Guo, L. Tang and Y. Y. Yang, *J. Org. Chem.*, 2023, **88**, 15589-15596.
25. Y. Ren, Y. Ruan, B. Cheng, L. Li, J. Liu, Y. Fang and J. Chen, *Bioorg. Med. Chem.*, 2021, **46**, 116376.
26. T. Cao, Y. P. Luo, L. Cheng, J. L. Zhao, Q. S. Jia, S. Zhang and X. W. Liu, *Eur. J. Org. Chem.*, 2023, **26**, e202300494.
27. S. Suárez-Pantiga, R. Hernández-Ruiz, C. Virumbrales, M. R. Pedrosa and R. Sanz, *Angew. Chem. Int. Ed.*, 2019, **131**, 2151-2155.
28. S.-S. Meng, F. Li, X. Tang and A. S. Chan, *Org. Lett.*, 2023, **25**, 3718-3722.
29. P. Hong, L. Wang, X. Zhu, M. Huang and Y. Wan, *Org. Lett.*, 2024, **26**, 10769-10773.
30. K. S. Iyer, K. B. D. Rodriguez, R. M. Lammert, J. R. Yirak, J. M. Saunders, R. D. Kavthe, D. H. Aue and B. H. Lipshutz, *Angew. Chem. Int. Ed.*, 2024, **63**, e202411295.
31. J. P. Wolfe, H. Tomori, J. P. Sadighi, J. Yin and S. L. Buchwald, *J. Org. Chem.*, 2000, **65**, 1158-1174.

32. D. Kim, P. Ghosh, N. Y. Kwon, S. H. Han, S. Han, N. K. Mishra, S. Kim and I. S. Kim, *J. Org. Chem.*, 2020, **85**, 2476-2485.
33. L. Y. Xie, S. Peng, L. L. Jiang, X. Peng, W. Xia, X. Yu, X. X. Wang, Z. Cao and W. M. He, *Org. Chem. Front.*, 2019, **6**, 167-171.
34. F. U. Nnamdi, R. Sullivan, B. Gorin and M. G. Organ, *Org. Lett.*, 2025, **27**, 3865-3870.
35. S. Saranya, S. Radhika and G. Anilkumar, *ChemistrySelect*, 2021, **6**, 6847-6850.
36. S. Graßl, J. Singer and P. Knochel, *Angew. Chem. Int. Ed.*, 2020, **59**, 335-338.
37. A. Monti, J. López-Serrano, A. Prieto and M. C. Nicasio, *ACS Catal.*, 2023, **13**, 10945-10952.
38. G. Kresse, J. Furthmüller, *Comput. Mater. Sci.*, 1996, **6**, 15-50.
39. M. J. Frisch, G. W. Trucks, H. B. Schlegel, G. E. Scuseria, M. A. Robb, J. R. Cheeseman, G. Scalmani, V. Barone, G. A. Petersson, H. Nakatsuji, X. Li, M. Caricato, A. V. Marenich, J. Bloino, B. G. Janesko, R. Gomperts, B. Mennucci, H. P. Hratchian, J. V. Ortiz, A. F. Izmaylov, J. L. Sonnenberg, D. Williams-Young, F. Ding, F. Lipparini, F. Egidi, J. Goings, B. Peng, A. Petrone, T. Henderson, D. Ranasinghe, V. G. Zakrzewski, J. Gao, N. Rega, G. Zheng, W. Liang, M. Hada, M. Ehara, K. Toyota, R. Fukuda, J. Hasegawa, M. Ishida, T. Nakajima, Y.; Honda, O. Kitao, H. Nakai, T. Vreven, K. Throssell, J. A. Jr. Montgomery, J. E. Peralta, F. Ogliaro, M. J. Bearpark, J. J. Heyd, E. N. Brothers, K. N. Kudin, V. N. Staroverov, T. A. Keith, R. Kobayashi, J. Normand, K. Raghavachari, A. P. Rendell, J. C. Burant, S. S. Iyengar, J. Tomasi, M. Cossi, J. M. Millam, M. Klene, C. Adamo, R. Cammi, J. W. Ochterski, R. L. Martin, K. Morokuma, O. Farkas, Foresman, Fox, D. J. Gaussian, Inc., Wallingford CT, 2016.
